# Supplementary material for: Medication use in pregnancy: a cross-sectional, multinational web-based study
Source: PubMed Central journal article supplement — BMJ Open. 2014 Feb 15;4(2):e004365. doi: 10.1136/bmjopen-2013-004365 (PMC3927801; doi:10.1136/bmjopen-2013-004365), 2014-02-15
Supplement: bmjopen-2013-004365.draft_revisions.pdf [file bmjopen-2013-004365.draft_revisions.pdf]

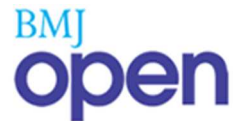

## Medication use in pregnancy: a multinational perspective

|                                 |                                                                                                                                                                                                                                                                                                                                                                                                                                                                                                                                                                                                                                                                                                                                                                                                                                                                                                                                                                                                                                                                                                                                                                                                                                                                                                                                                                                                                                                                                                                                                                                                                                                                                                                                                                                                                                                                                                                                                                                                                                                                                                                                            |
|---------------------------------|--------------------------------------------------------------------------------------------------------------------------------------------------------------------------------------------------------------------------------------------------------------------------------------------------------------------------------------------------------------------------------------------------------------------------------------------------------------------------------------------------------------------------------------------------------------------------------------------------------------------------------------------------------------------------------------------------------------------------------------------------------------------------------------------------------------------------------------------------------------------------------------------------------------------------------------------------------------------------------------------------------------------------------------------------------------------------------------------------------------------------------------------------------------------------------------------------------------------------------------------------------------------------------------------------------------------------------------------------------------------------------------------------------------------------------------------------------------------------------------------------------------------------------------------------------------------------------------------------------------------------------------------------------------------------------------------------------------------------------------------------------------------------------------------------------------------------------------------------------------------------------------------------------------------------------------------------------------------------------------------------------------------------------------------------------------------------------------------------------------------------------------------|
| Journal:                        | <i>BMJ Open</i>                                                                                                                                                                                                                                                                                                                                                                                                                                                                                                                                                                                                                                                                                                                                                                                                                                                                                                                                                                                                                                                                                                                                                                                                                                                                                                                                                                                                                                                                                                                                                                                                                                                                                                                                                                                                                                                                                                                                                                                                                                                                                                                            |
| Manuscript ID:                  | bmjopen-2013-004365                                                                                                                                                                                                                                                                                                                                                                                                                                                                                                                                                                                                                                                                                                                                                                                                                                                                                                                                                                                                                                                                                                                                                                                                                                                                                                                                                                                                                                                                                                                                                                                                                                                                                                                                                                                                                                                                                                                                                                                                                                                                                                                        |
| Article Type:                   | Research                                                                                                                                                                                                                                                                                                                                                                                                                                                                                                                                                                                                                                                                                                                                                                                                                                                                                                                                                                                                                                                                                                                                                                                                                                                                                                                                                                                                                                                                                                                                                                                                                                                                                                                                                                                                                                                                                                                                                                                                                                                                                                                                   |
| Date Submitted by the Author:   | 30-Oct-2013                                                                                                                                                                                                                                                                                                                                                                                                                                                                                                                                                                                                                                                                                                                                                                                                                                                                                                                                                                                                                                                                                                                                                                                                                                                                                                                                                                                                                                                                                                                                                                                                                                                                                                                                                                                                                                                                                                                                                                                                                                                                                                                                |
| Complete List of Authors:       | <p>Lupattelli, Angela; University of Oslo, School of Pharmacy<br/>         Spigset, Olav; St Olav's University Hospital, Department of Clinical Pharmacology; Children's and Women's Health, Norwegian University of Science and Technology, Department of Laboratory Medicine<br/>         Twigg, Michael; University of East Anglia, School of Pharmacy<br/>         Zagorodnikova, Ksenia; Northwest State Medical University n.a.I.I. Mechnikov, Northwest Medical Center for Drug Safety in Pregnancy &amp; Lactation<br/>         Mårdby, Ann-Charlotte ; The Sahlgrenska Academy, University of Gothenburg, Department of Public Health and Community Medicine<br/>         Moretti, Myla; The Hospital for Sick Children, University of Toronto, The Motherisk Program, Division of Clinical Pharmacology and Toxicology<br/>         Drozd, Mariola; Medical University of Lublin, Faculty of Pharmacy<br/>         Panchaud, Alice; University of Geneva and Lausanne, School of Pharmaceutical Sciences<br/>         Hämeen-Anttila, Katri; Finnish Medicines Agency,<br/>         Rieutord, Andre; AHPH, GH HUPS, Hop Antoine Béclère,, Service Pharmacie, Clamart France and Européenne de Formation pour les Pharmaciens<br/>         Gjergja Juraski, Romana; Children's Hospital Srebrnjak, Neuropediatric Unit<br/>         Odalovic, Marina; Faculty of pharmacy, University of Belgrade, Department of Social Pharmacy and Pharmaceutical Legislation<br/>         Kennedy, Debra; Royal Hospital for Women and University of NSW, MotherSafe<br/>         Rudolf, Gorazd; University Medical Centre Ljubljana, Clinical Institute of Medical Genetics<br/>         Juch, Herbert; Medical University of Graz, Research Unit Human Teratogens, Institute for Cell Biology, Histology and Embryology<br/>         Passier, Anneke; Netherlands Pharmacovigilance Centre Lareb, Teratology Information Service (TIS),<br/>         Björnsdóttir, Ingunn; University of Iceland,<br/>         Nordeng, Hedvig; University of Oslo, School of Pharmacy; Norwegian Institute of Public Health, Division of Mental Health</p> |
| <b>Primary Subject Heading</b>: | Obstetrics and gynaecology                                                                                                                                                                                                                                                                                                                                                                                                                                                                                                                                                                                                                                                                                                                                                                                                                                                                                                                                                                                                                                                                                                                                                                                                                                                                                                                                                                                                                                                                                                                                                                                                                                                                                                                                                                                                                                                                                                                                                                                                                                                                                                                 |
| Secondary Subject Heading:      | Obstetrics and gynaecology, Pharmacology and therapeutics, Public health                                                                                                                                                                                                                                                                                                                                                                                                                                                                                                                                                                                                                                                                                                                                                                                                                                                                                                                                                                                                                                                                                                                                                                                                                                                                                                                                                                                                                                                                                                                                                                                                                                                                                                                                                                                                                                                                                                                                                                                                                                                                   |
| Keywords:                       | Maternal medicine < OBSTETRICS, THERAPEUTICS, Public health < INFECTIOUS DISEASES                                                                                                                                                                                                                                                                                                                                                                                                                                                                                                                                                                                                                                                                                                                                                                                                                                                                                                                                                                                                                                                                                                                                                                                                                                                                                                                                                                                                                                                                                                                                                                                                                                                                                                                                                                                                                                                                                                                                                                                                                                                          |

1  
2  
3  
4  
5  
6  
7  
8  
9  
10  
11  
12  
13  
14  
15  
16  
17  
18  
19  
20  
21  
22  
23  
24  
25  
26  
27  
28  
29  
30  
31  
32  
33  
34  
35  
36  
37  
38  
39  
40  
41  
42  
43  
44  
45  
46  
47  
48  
49  
50  
51  
52  
53  
54  
55  
56  
57  
58  
59  
60

|                                                                                                                                                         |
|---------------------------------------------------------------------------------------------------------------------------------------------------------|
|                                                                                                                                                         |
| Note: The following files were submitted by the author for peer review, but cannot be converted to PDF. You must view these files (e.g. movies) online. |
| Herbal Survey revised submission-1.pdf                                                                                                                  |

SCHOLARONE™  
Manuscripts

For peer review only

## Medication use in pregnancy: a multinational perspective

Lupattelli A,<sup>1</sup> Spigset O,<sup>2,3</sup> Twigg MJ,<sup>4</sup> Zagorodnikova K,<sup>5</sup> Mårdby AC,<sup>6</sup> Moretti ME,<sup>7</sup> Drozd M,<sup>8</sup> Panchaud A,<sup>9</sup> Hameen-Anttila K,<sup>10</sup> Rieutord A,<sup>11</sup> Gjergja Juraski R,<sup>12</sup> Odalovic M,<sup>13</sup> Kennedy D,<sup>14</sup> Rudolf G,<sup>15</sup> Juch H,<sup>16</sup> Passier JLM,<sup>17</sup> Björnsdóttir I,<sup>18</sup> Nordeng H<sup>1,19</sup>.

<sup>1</sup>*School of Pharmacy, University of Oslo, Norway*

<sup>2</sup>*Department of Clinical Pharmacology, St Olav's University Hospital, Trondheim, Norway*

<sup>3</sup>*Department of Laboratory Medicine, Children's and Women's Health, Norwegian University of Science and Technology, Trondheim, Norway*

<sup>4</sup>*School of Pharmacy, University of East Anglia, Norwich Research Park, United Kingdom*

<sup>5</sup>*Northwest Medical Center for Drug Safety in Pregnancy & Lactation, Northwest State Medical University n.a.I.I.Mechnikov, St. Petersburg, Russia*

<sup>6</sup>*Department of Public Health and Community Medicine, The Sahlgrenska Academy, University of Gothenburg, Gothenburg, Sweden*

<sup>7</sup>*The Motherisk Program, Division of Clinical Pharmacology and Toxicology, The Hospital for Sick Children, University of Toronto, Ontario, Canada*

<sup>8</sup>*Faculty of Pharmacy, Medical University of Lublin, Poland*

<sup>9</sup>*School of Pharmaceutical Sciences, University of Geneva and Lausanne, Geneva, Switzerland*

<sup>10</sup>*Finnish Medicines Agency, Kuopio, Finland*

<sup>11</sup>*APHP, GH HUPS, Hop Antoine Béclère, Service Pharmacie, Clamart France and Européenne de Formation pour les Pharmaciens, France*

<sup>12</sup>*Children's Hospital Srebrnjak, Neuropediatric Unit, Zagreb, Croatia*

<sup>13</sup>*Department of Social Pharmacy and Pharmaceutical Legislation, Faculty of pharmacy, University of Belgrade, Serbia*

<sup>14</sup>*MotherSafe, Royal Hospital for Women and University of NSW, Randwick, Australia*

<sup>15</sup>*Clinical Institute of Medical Genetics, University Medical Centre Ljubljana, Slovenia*

<sup>16</sup>*Research Unit Human Teratogens, Institute for Cell Biology, Histology and Embryology, Medical University of Graz, Austria*

<sup>17</sup>*Teratology Information Service (TIS), Netherlands Pharmacovigilance Centre Lareb, Den Bosch, the Netherlands*

<sup>18</sup>*University of Iceland, Reykjavik, Iceland*

<sup>19</sup>*Division of Mental Health, Norwegian Institute of Public Health, Oslo, Norway*

### Corresponding author:

Angela Lupattelli, MScPharm,

Department of Pharmacy, School of Pharmacy, University of Oslo,

PO Box 1068 Blindern, 0316 Oslo, Norway

e-mail: [angela.lupattelli@farmasi.uio.no](mailto:angela.lupattelli@farmasi.uio.no); phone: +47 41343628 ; fax: +4722854402

1  
2  
3  
4  
5  
6  
7  
8  
9  
10  
11  
12  
13  
14  
15  
16  
17  
18  
19  
20  
21  
22  
23  
24  
25  
26  
27  
28  
29  
30  
31  
32  
33  
34  
35  
36  
37  
38  
39  
40  
41  
42  
43  
44  
45  
46  
47  
48  
49  
50  
51  
52  
53  
54  
55  
56  
57  
58  
59  
60

**Key words:** pregnancy; drug utilization, maternal health; health behaviour; public health

**Word count** (excluding title page, abstract, references, figures and tables): 3333

For peer review only

## ABSTRACT

**Objectives:** Inter-country comparability between studies on medication use in pregnancy is difficult due to dissimilarities in study design and methodology. This study aimed to examine patterns and determinants of medications use in pregnancy from a multinational perspective, with emphasis on type of medication utilized and indication for use.

**Design:** Cross-sectional, internet-based study performed within the period from 1-Oct-2011 to 29-Feb-2012. Uniform collection of drug utilization data was performed via an anonymous online questionnaire.

**Setting:** Multinational study in Europe (Western, Northern, and Eastern), North and South America, and Australia.

**Participants:** Pregnant women and new mothers with children less than one year of age.

**Primary and secondary outcome measures:** Prevalence and determinants of medication use for acute illnesses, chronic disorders and over-the-counter (OTC) medication use.

**Results:** The study population included 9,459 women whereof 81.2% reported use of at least one medication (prescribed or OTC) during pregnancy. OTC medication use occurred in 66.9% of the pregnancies. The extent of self-reported medicated illnesses and types of medication used by indication varied across regions, especially in relation to urinary tract infections, depression or OTC nasal sprays. Women with higher age or lower educational level, housewives, or women with an unplanned pregnancy were those most often reporting use of chronic medication. Immigrant women in Western (aOR: 0.55, 95% CI: 0.34-0.87) and

1  
2  
3 Northern Europe (aOR: 0.50, 95% CI: 0.31-0.83) were less likely to report chronic medication  
4  
5 use during pregnancy than non-immigrants.  
6  
7

8 **Conclusions:** There is a substantial inter-region variability in the extent of medication use  
9  
10 during pregnancy. In certain subgroups of the population there is a specific need for  
11  
12 information about medications in pregnancy. Future research should focus on this specific  
13  
14 group of women, but also address more insights into the outcome of sub-optimal medication  
15  
16 of severe conditions in pregnancy.  
17  
18  
19  
20  
21  
22  
23  
24  
25  
26  
27  
28  
29  
30  
31  
32  
33  
34  
35  
36  
37  
38  
39  
40  
41  
42  
43  
44  
45  
46  
47  
48  
49  
50  
51  
52  
53  
54  
55  
56  
57  
58  
59  
60

## ARTICLE SUMMARY

### Strengths and limitations of this study

- Uniform data collection of drug utilization data across all participating countries allows for intercountry comparability of the prevalence of medication use during pregnancy, up to now impeded by differences in study design and methodology.
- The study adds a multinational perspective on OTC medication use during pregnancy to the limited number of studies quantifying the extent of self-medication during pregnancy.
- Lack of validity of the self-reported diagnoses since all disorders and related medication use were self-reported by the study participants.
- An internet survey as a study method impedes calculation of a conventional response rate and may cause selection bias of the target population.

1  
2  
3  
4  
5  
6  
7  
8  
9  
10  
11  
12  
13  
14  
15  
16  
17  
18  
19  
20  
21  
22  
23  
24  
25  
26  
27  
28  
29  
30  
31  
32  
33  
34  
35  
36  
37  
38  
39  
40  
41  
42  
43  
44  
45  
46  
47  
48  
49  
50  
51  
52  
53  
54  
55  
56  
57  
58  
59  
60

**FUNDING STATEMENT**

This work was supported by the the Norwegian Research Council grant number 216771/F11 and by the Foundation for Promotion of Norwegian Pharmacies and the Norwegian Pharmaceutical Society.

**COMPETING INTERESTS:** None declared

For peer review only



## INTRODUCTION

Ethical reasons preclude inclusion of pregnant women in the vast majority of pre-marketing clinical trials.[1] As a consequence, most medications are placed onto the market without a directly established safety profile in human pregnancy.[2] So far, few medications have been shown to be major teratogens, yet the risk of minor teratogenicity or of more subtle effects on fetal development still have to be determined for most of them.[3] Despite this, medication use during pregnancy is common. Mitchell et al. found that use of medications, either prescribed or purchased over-the-counter (OTC), occurred in 88.8% of all pregnancies in the USA.[4] In Europe, prevalence estimates of prescribed medication use vary considerably across countries, ranging from 26% in Serbia to 93% in France.[5-10] Such inter-country variability could, at least in part, be caused by differences in study design, methodology and exposure ascertainment across studies.[11] Uniform collection of drug utilization data during pregnancy between countries may overcome such drawbacks, allowing for inter-country comparability of prevalence estimates and shedding light on differences in prenatal care in the various countries.

Prior studies have addressed research priorities in this area such as presenting results on an individual drug level according to the indication of use, quantifying the extent of OTC and prescribed medication use during pregnancy, and taking into account inter-country comparability.[4] Only a few studies have individually examined maternal factors associated with specific types of medication use during pregnancy.[11-14]

The objectives of the current study were to examine patterns of medication use in pregnancy from a multinational perspective, with special emphasis on type of medication utilized, including OTC medications, and self-reported indications for use, and to identify maternal

1  
2  
3 background factors potentially associated with the use of specific types of medication during  
4 pregnancy.  
5  
6

## 7 8 **METHODS**

### 9 **Study design and data collection**

10  
11 This is a multinational, cross-sectional, internet-based study. Pregnant women at any  
12 gestational week and mothers with children less than one year of age were eligible to  
13 participate. Member countries of the European Network of Teratology Information Services  
14 (ENTIS), The Organization of Teratology Information Specialists (OTIS) in North America,  
15 MotherSafe in Australia and European institutions conducting public health research were  
16 invited to take part in the project. Of these, 18 countries participated (Australia, Austria,  
17 Canada, Croatia, Finland, France, Iceland, Italy, Netherlands, Norway, Poland, Russia, Serbia,  
18 Slovenia, Sweden, Switzerland, United Kingdom and USA). Data originating from some  
19 South and Central American countries were also collected through OTIS. Because of the low  
20 number of participants on the individual country level, the region of Central America was  
21 excluded and countries in South America were aggregated into one region. Data selection to  
22 achieve the final study sample was performed as depicted in Figure 1. Participants were  
23 categorized according to the reported country of residency and grouped into six regions:  
24 Western Europe, Northern Europe, Eastern Europe, North America, South America and  
25 Australia.  
26  
27  
28  
29  
30  
31  
32  
33  
34  
35  
36  
37  
38  
39  
40  
41  
42  
43  
44  
45  
46

47 Data were collected through an anonymous on-line questionnaire administered by Quest Back  
48 (<http://www.questback.com>) and accessible for a period of two months in each participating  
49 country within the period 1-Oct-2011 to 29-Feb-2012. The questionnaire was open to the  
50 public via utilization of banners (invitations to participate in the study) on national websites  
51 and/or social networks commonly visited and consulted by pregnant women and/or new  
52  
53  
54  
55  
56  
57  
58  
59  
60

1  
2  
3 mothers. Detailed information about recruitment tools utilized and internet penetration rates is  
4  
5 summarized in Appendix 1.  
6  
7

8  
9 The questionnaire was first developed in Norwegian and English and then translated into the  
10  
11 other relevant languages. A pilot study was carried out in September 2011 (n=47) and elicited  
12  
13 no major change to the questionnaire. Collected data were scrutinized for the presence of  
14  
15 potential duplicates (based on reported country of residency, socio-demographic  
16  
17 characteristics, date and exact time of questionnaire completion) but none were identified.  
18  
19

### 20 21 **Exposure variables**

22  
23 Maternal socio-demographics (i.e. region of residency, age, educational level, mother tongue,  
24  
25 working status, previous children, marital status and unplanned pregnancy) and life-style  
26  
27 characteristics (i.e. smoking status before and during pregnancy and alcohol consumption  
28  
29 after awareness of pregnancy) constituted the exposure variables. To assess external validity,  
30  
31 we compared socio-demographic and life-style characteristics of our study population on an  
32  
33 individual country level with those of the general birthing population in the same country.  
34  
35 Reports of National Statistics Bureaus or previous national studies were utilized for this  
36  
37 purpose. The ratio between the number of respondents and the estimated number of live births  
38  
39 in the 2-months period was also examined for each country (Appendix 2).  
40  
41  
42  
43

### 44 45 **Outcome variables**

46  
47 Use of prescribed medication for acute/short-term illnesses or chronic/long-term disorders and  
48  
49 OTC medication use during pregnancy constituted the outcome variables. Participants were  
50  
51 first confronted with a list of the most common acute/short-term illnesses (i.e. nausea,  
52  
53 heartburn, constipation, common cold, urinary tract infections (UTIs), other infections, pain in  
54  
55 the neck/back/pelvic girdle, headache, sleeping problems) and the most prevalent  
56  
57  
58  
59  
60

1  
2  
3 chronic/long-term disorders (i.e. asthma, allergy, hypothyroidism, rheumatic disorders,  
4  
5 diabetes, epilepsy, depression, anxiety, cardiovascular disease, other disorders) and asked  
6  
7 whether they suffered/had suffered from these conditions during pregnancy. In case of an  
8  
9 affirmative response, women were questioned about medication use for each individual  
10  
11 indication as a free-text entry. Use of OTC medications was also recorded. Recall was aided  
12  
13 with a list of five OTC categories: painkillers, nasal spray/drops, antinauseants, antacids and  
14  
15 laxatives, along with examples of brand name products of relevance in each country. Timing  
16  
17 of exposure (gestational weeks 0-12 (1<sup>st</sup> trimester), 13-24 (2<sup>nd</sup> trimester) and 25-delivery (3<sup>rd</sup>  
18  
19 trimester)) could be reported for each of the medication use questions.  
20  
21

22  
23  
24 We defined a medicine as a single product containing one or more active ingredients. We  
25  
26 initially identified the main active ingredient(s) and formulation of the reported medicinal  
27  
28 products either in the relevant national medicines database or in the “Martindale”  
29  
30 textbook.[15] All recorded medications were coded into the corresponding Anatomical  
31  
32 Therapeutic Chemical (ATC) codes at the ATC 5<sup>th</sup> level (i.e. the substance level) whenever  
33  
34 possible, otherwise into the 2<sup>nd</sup>- 4<sup>th</sup> levels as appropriate, in accordance with the World Health  
35  
36 Organization ATC index.[16] The OTC status of medications was crosschecked with the  
37  
38 prescription policies within each country. Whenever a prescription medication was reported  
39  
40 under the OTC question, this record was omitted from the analysis of OTC use but counted in  
41  
42 the estimation of total medication use (including prescription and OTC). Iron, mineral  
43  
44 supplements, vitamins, herbal remedies and any type of alternative medicine were recorded  
45  
46 separately and excluded from the estimation of medication use.  
47  
48  
49

## 50 51 52 **Ethics**

53  
54 All participants gave informed consent by answering “Yes” to the question “Are you willing  
55  
56 to participate in the study?” The study was approved by the Regional Ethics Committee,  
57  
58

1  
2  
3 Region South-East in Norway. Ethical approval or study notification to the relevant national  
4  
5 Ethics Boards was achieved in specific countries as required by national legislation. All data  
6  
7 were handled and stored anonymously.  
8  
9

### 10 11 **Statistical analysis**

12  
13 Descriptive statistics were utilized as appropriate. Univariate and multivariate logistic  
14  
15 regression analyses were used to examine the association between maternal characteristic and  
16  
17 three categorical outcome measures (Yes/No): Medication use for acute/short-term illnesses;  
18  
19 medication use for chronic/long-term disorders; OTC medication use. P-values of <0.05 were  
20  
21 considered statistically significant. Data are presented as adjusted odds ratios (aOR) with 95%  
22  
23 confidence intervals (CI). The analyzed explanatory variables included all maternal socio-  
24  
25 demographics and life-style characteristics. After fitting the univariate logistic regression  
26  
27 model for all explanatory variables, the multivariate model was built and adjusted for all  
28  
29 remaining covariates. The Hosmer and Lemeshow test was used to assess goodness of fit of  
30  
31 the final multivariate model.[17] Analogue sub-analyses on individual region level were  
32  
33 performed. In these instances, region of residency was not included in the model. All  
34  
35 statistical analyses were performed by using the Statistical Package for the Social Sciences  
36  
37 (SPSS) version 20.0 (IBM® SPSS® Statistics).  
38  
39  
40  
41  
42

## 43 **RESULTS**

### 44 45 **Population characteristics**

46  
47 A total of 9,615 women accessed the on-line questionnaire whereof 98.6% completed it. The  
48  
49 participant flow-chart to achieve final study population (n=9,459) is depicted in Figure 1. A  
50  
51 total of 5,089 women (53.8%) were pregnant at the time of completion of the questionnaire  
52  
53 whereas 4,370 women (46.2%) had delivered their babies within the previous year.  
54  
55  
56  
57  
58  
59  
60

1  
2  
3 Overall, the birthing population in each participating country was reflected quite well by the  
4 sample with respect to age, parity and smoking habits (Appendix 2). However, there was a  
5 difference in terms of educational level; on average, the women in the study had higher  
6 education than the general birthing population in each country. In addition, participants in  
7 Sweden, Austria, Iceland and Italy were slightly more often primiparous, whereas the  
8 responders in Australia, USA, Netherlands, Slovenia and Croatia were somewhat older than  
9 the general birthing population.  
10  
11  
12  
13  
14  
15  
16  
17  
18  
19

### 20 **Total medication use**

21 After exclusion of vitamins, mineral supplements and iron, use of at least one medication  
22 either prescribed or OTC at any time during pregnancy was reported by 7,678 out of 9,459  
23 women (81.2%). Figure 2 depicts prevalence estimates of total medication use during  
24 pregnancy by region and country of residence, with specific rates according to inclusion or  
25 exclusion of vitamins, mineral supplements and iron. The extent of OTC medication use is  
26 also outlined. The highest prevalence of total medication use during pregnancy was observed  
27 in The Netherlands (95.1%), Iceland (93.0%) and Finland (92.3%). The overall prevalence  
28 estimates of medication use in pregnancy according to timing and drug class (ATC level 1 and  
29 2) are presented in Appendix 3. Medications for the nervous system (ATC class N) were the  
30 most commonly used during pregnancy (57.5%), mostly due to paracetamol (acetaminophen)  
31 and its combinations.  
32  
33  
34  
35  
36  
37  
38  
39  
40  
41  
42  
43  
44  
45  
46  
47

### 48 **Medication use according to indication**

49 Headache, heartburn, pain, nausea and UTIs constituted the leading indications for use of  
50 medication during pregnancy among the acute/short-term illnesses analyzed. Hypothyroidism,  
51 asthma, allergy and depression were the leading indications for chronic/long-term medication  
52 use. Observed prevalence rates of these disorders, overall and by region of residency, are  
53  
54  
55  
56  
57  
58  
59  
60

1  
2  
3 presented in Appendices 4 and 5, respectively, along with rates of total and specific  
4  
5 medication use. Table 1 outlines prevalence estimates of OTC medication use during  
6  
7 pregnancy by region and indication for use. Only the most common medication groups  
8  
9 reported are presented. Inter-region variations in rates and types of medication used during  
10  
11 pregnancy were observed both for acute/short-term illnesses (e.g. nausea and UTIs),  
12  
13 chronic/long-term disorders (e.g. asthma and depression) and OTC medications (e.g. nasal  
14  
15 spray).  
16  
17  
18  
19  
20  
21  
22  
23  
24  
25  
26  
27  
28  
29  
30  
31  
32  
33  
34  
35  
36  
37  
38  
39  
40  
41  
42  
43  
44  
45  
46  
47  
48  
49  
50  
51  
52  
53  
54  
55  
56  
57  
58  
59  
60

**Table 1:** Use of OTC medication at any time during pregnancy by ATC level, indication for use and region (n=9,459) <sup>\*†</sup>

| OTC medication use, overall and by drug groups           | REGION              |                     |                   |                   |                   |                   | Total               |
|----------------------------------------------------------|---------------------|---------------------|-------------------|-------------------|-------------------|-------------------|---------------------|
|                                                          | Western Europe      | Northern Europe     | Eastern Europe    | North America     | South America     | Australian        |                     |
|                                                          | n=3,201             | n=2,820             | n=2,342           | n=533             | n=346             | n=217             | n=9,459             |
|                                                          | n (%)               | n (%)               | n (%)             | n (%)             | n (%)             | n (%)             | n (%)               |
| <b>OTC painkillers, total</b>                            | <b>1,714 (53.5)</b> | <b>1,773 (62.9)</b> | <b>734 (31.3)</b> | <b>284 (53.3)</b> | <b>127 (36.7)</b> | <b>151 (69.9)</b> | <b>4,783 (50.6)</b> |
| <i>By drug group</i>                                     |                     |                     |                   |                   |                   |                   |                     |
| Paracetamol (incl. combinations) (N02BE)                 | 1,655 (51.7)        | 1,735 (61.5)        | 630 (26.9)        | 263 (49.3)        | 87 (25.1)         | 146 (67.3)        | 4,516 (47.7)        |
| Non-steroidal antiinflammatory drugs (M01A)              | 70 (2.2)            | 182 (6.5)           | 68 (2.9)          | 40 (7.5)          | 59 (17.1)         | 7 (3.2)           | 426 (4.5)           |
| Acetylsalicylic acid (incl. combinations) (N02BA)        | 7 (0.2)             | 11 (0.4)            | 32 (1.4)          | 2 (0.4)           | 2 (0.6)           | 1 (0.5)           | 55 (0.6)            |
| Metamizole (N02BB02)                                     | -                   | 6 (0.2)             | 31 (1.3)          | 1 (0.2)           | 12 (3.5)          | -                 | 50 (0.5)            |
| <b>OTC antacids, total</b>                               | <b>1,011 (31.6)</b> | <b>883 (31.3)</b>   | <b>583 (24.9)</b> | <b>129 (24.2)</b> | <b>48 (13.9)</b>  | <b>76 (35.0)</b>  | <b>2,730 (28.9)</b> |
| <i>By drug group</i>                                     |                     |                     |                   |                   |                   |                   |                     |
| Antacids (aluminium, salts combinations, antiflatulents) | 472 (14.7)          | 550 (19.5)          | 508 (21.7)        | 47 (8.8)          | 36 (10.4)         | 54 (24.9)         | 1,667 (17.6)        |
| Alginic acid complex/sucralfate/bismuth (A02BX)          | 606 (18.9)          | 421 (14.9)          | 87 (3.7)          | 4 (0.8)           | 1 (0.3)           | 17 (7.8)          | 1,136 (12.0)        |
| H <sub>2</sub> receptor antagonists (A02BA)              | 20 (0.6)            | 20 (0.7)            | 16 (0.7)          | 57 (10.1)         | 10 (2.9)          | 17 (7.8)          | 137 (1.4)           |
| Antacids with calcium (A02AC)                            | 23 (0.7)            | 12 (0.4)            | 10 (0.4)          | 69 (12.9)         | 2 (0.6)           | 10 (4.6)          | 126 (1.3)           |
| Proton pump inhibitors (A02BC)                           | 38 (1.2)            | 52 (1.8)            | -                 | 10 (1.9)          | 2 (0.6)           | 5 (0.3)           | 107 (1.1)           |
| <b>OTC nasal sprays/drops, total</b>                     | <b>272 (8.5)</b>    | <b>742 (26.3)</b>   | <b>451 (19.3)</b> | <b>35 (6.6)</b>   | <b>7 (2.0)</b>    | <b>14 (6.5)</b>   | <b>1,521 (16.1)</b> |
| <i>By drug group</i>                                     |                     |                     |                   |                   |                   |                   |                     |
| Sympathomimetic nasal decongestants (R01AA/R01BB)        | 204 (6.4)           | 683 (24.2)          | 365 (15.6)        | 20 (3.8)          | 3 (0.9)           | 4 (1.8)           | 1,279 (13.5)        |
| Nasal corticosteroids (R01AD)                            | 31 (1.0)            | 49 (1.7)            | 12 (0.5)          | 5 (0.9)           | 2 (0.6)           | 10 (4.6)          | 109 (1.2)           |
| Nasal immunostimulants (low dose interferon) (L03A)      | -                   | -                   | 28 (1.2)          | -                 | -                 | -                 | 28 (0.3)            |
| <b>OTC laxatives, total</b>                              | <b>240 (7.5)</b>    | <b>227 (8.0)</b>    | <b>237 (10.1)</b> | <b>50 (9.4)</b>   | <b>8 (2.3)</b>    | <b>19 (8.8)</b>   | <b>781 (8.3)</b>    |
| <i>By drug group</i>                                     |                     |                     |                   |                   |                   |                   |                     |
| Osmotically acting laxatives (A06AD)                     | 159 (5.0)           | 171 (6.1)           | 197 (8.4)         | 2 (0.4)           | 2 (0.6)           | 8 (3.7)           | 539 (5.7)           |
| Contact laxatives (A06AB)                                | 28 (0.9)            | 44 (1.6)            | 18 (0.8)          | 7 (1.3)           | 6 (1.7)           | 2 (0.9)           | 105 (1.1)           |



| OTC medication use, overall and by drug groups | REGION              |                     |                     |                   |                   |                   | Total               |
|------------------------------------------------|---------------------|---------------------|---------------------|-------------------|-------------------|-------------------|---------------------|
|                                                | Western Europe      | Northern Europe     | Eastern Europe      | North America     | South America     | Australian        |                     |
|                                                | <b>n=3,201</b>      | <b>n=2,820</b>      | <b>n=2,342</b>      | <b>n=533</b>      | <b>n=346</b>      | <b>n=217</b>      | <b>n=9,459</b>      |
|                                                | <b>n (%)</b>        | <b>n (%)</b>        | <b>n (%)</b>        | <b>n (%)</b>      | <b>n (%)</b>      | <b>n (%)</b>      | <b>n (%)</b>        |
| Enemas (A06AG)                                 | 3 (0.1)             | 25 (0.9)            | 34 (1.5)            | 4 (0.8)           | -                 | 2 (0.9)           | 68 (0.7)            |
| Softeners, emollients (A06AA)                  | 8 (0.2)             | -                   | -                   | 38 (7.1)          | -                 | 6 (2.8)           | 52 (0.5)            |
| <b>OTC antinauseants, total</b>                | <b>263 (8.2)</b>    | <b>273 (9.7)</b>    | <b>41 (1.8)</b>     | <b>60 (11.3)</b>  | <b>28 (8.1)</b>   | <b>40 (18.4)</b>  | <b>705 (7.5)</b>    |
| <i>By drug group</i>                           |                     |                     |                     |                   |                   |                   |                     |
| First generation antihistamines (R06A)         | 141 (4.4)           | 256 (9.1)           | 7 (1.5)             | 55 (10.3)         | 5 (1.4)           | 5 (2.3)           | 469 (5.0)           |
| Metoclopramide/domperidone/bromopride (A03FA)  | 113 (3.5)           | 5 (0.2)             | 18 (0.8)            | 2 (0.4)           | 19 (5.5)          | 27 (12.4)         | 184 (1.9)           |
| <b>Total OTC medication use</b>                | <b>2,163 (67.6)</b> | <b>2,155 (76.4)</b> | <b>1,347 (57.5)</b> | <b>342 (64.2)</b> | <b>156 (45.1)</b> | <b>168 (77.4)</b> | <b>6,331 (66.9)</b> |

\*Countries are grouped into regions as shown in Figure 1.

†Sums of percentages do not add up to total medication use as only most common medication groups are presented. Rates do not include mineral supplements, vitamins, iron, and herbal or alternative medicine products.

Abbreviations: OTC: Over-The-Counter medications.

### Determinants of medication use

Determinants of medication use during pregnancy according to type of medication utilized are presented in table 2. Use of chronic/long-term medications during pregnancy was reported in a significant larger extent by women in Northern Europe (aOR:1.68, 95% CI:1.46-1.94), North America (aOR:1.80, 95% CI:1.42-2.28) and Australia (aOR:2.76, 95% CI:2.03-3.76) compared to women in Western Europe. Older women or housewives, those with low education or with an unplanned pregnancy, were the ones most often reporting use of chronic/long-term medication. Sub-analysis on individual region level revealed that women not having the official language of the country of residency as mother tongue were less likely to report chronic/long-term medication use in Western (aOR: 0.55, 95% CI: 0.34-0.87) and Northern Europe (aOR: 0.50, 95% CI: 0.31-0.83), but not in the other regions.

**Table 2:** Determinants of medication use in pregnancy (n=9,459)\*

|                             | Medication use                              |                         |                                              |                         |                  |                         |
|-----------------------------|---------------------------------------------|-------------------------|----------------------------------------------|-------------------------|------------------|-------------------------|
|                             | For acute/short-term illnesses<br>(n=6,469) |                         | For chronic/long-term disorders<br>(n=1,604) |                         | OTC<br>(n=6,331) |                         |
|                             | n (%)                                       | aOR (95% CI)            | n (%)                                        | aOR (95% CI)            | n (%)            | aOR (95% CI)            |
| <b>Region of residency†</b> |                                             |                         |                                              |                         |                  |                         |
| Western Europe              | 2,224 (69.5)                                | Reference               | 462 (14.4)                                   | Reference               | 2,163 (67.6)     | Reference               |
| Northern Europe             | 1,954 (69.3)                                | 0.96 (0.86-1.08)        | 593 (21.0)                                   | <b>1.68 (1.46-1.94)</b> | 2,155 (76.4)     | <b>1.54 (1.36-1.74)</b> |
| Eastern Europe              | 1,474 (62.9)                                | <b>0.69 (0.61-0.78)</b> | 322 (13.7)                                   | 1.03 (0.87-1.21)        | 1,347 (57.5)     | <b>0.60 (0.53-0.67)</b> |
| North America               | 403 (75.6)                                  | <b>1.28 (1.03-1.60)</b> | 119 (22.3)                                   | <b>1.80 (1.42-2.28)</b> | 342 (64.2)       | <b>0.81 (0.66-0.99)</b> |
| South America               | 250 (82.3)                                  | 1.03 (0.79-1.34)        | 38 (11.0)                                    | 0.70 (0.48-1.01)        | 156 (45.1)       | <b>0.34 (0.27-0.44)</b> |
| Australia                   | 164 (75.6)                                  | 1.29 (0.93-1.79)        | 70 (32.3)                                    | <b>2.76 (2.03-3.76)</b> | 168 (77.4)       | <b>1.57 (1.12-2.20)</b> |
| <b>Maternal age (years)</b> |                                             |                         |                                              |                         |                  |                         |
| ≤20                         | 232 (70.5)                                  | 1.22 (0.93-1.60)        | 761 (14.7)                                   | <b>0.58 (0.39-0.87)</b> | 205 (62.3)       | 1.05 (0.81-1.36)        |
| 21-30                       | 3,531 (68.2)                                | Reference               | 33 (10.0)                                    | Reference               | 3,461 (66.8)     | Reference               |
| 31-40                       | 2,576 (68.6)                                | 0.90 (0.82-1.00)        | 764 (20.4)                                   | <b>1.44 (1.27-1.63)</b> | 2,531 (67.4)     | <b>0.85 (0.77-0.94)</b> |
| ≥41                         | 130 (66.3)                                  | 0.73 (0.54-1.00)        | 46 (23.5)                                    | <b>1.61 (1.13-2.29)</b> | 134 (68.4)       | 0.86 (0.62-1.19)        |
| <b>Previous children</b>    |                                             |                         |                                              |                         |                  |                         |
| No                          | 3,082 (65.5)                                | Reference               | 735 (15.6)                                   | Reference               | 2,949 (62.6)     | Reference               |
| Yes                         | 3,387 (71.3)                                | <b>1.34 (1.22-1.47)</b> | 869 (18.3)                                   | 1.08 (0.96-1.21)        | 3,382 (71.2)     | <b>1.58 (1.44-1.74)</b> |
| <b>Marital status</b>       |                                             |                         |                                              |                         |                  |                         |
| Married/cohabiting          | 6,066 (68.5)                                | Reference               | 1,503 (17.0)                                 | Reference               | 5,960 (67.3)     | Reference               |
| Single/divorced/others      | 403 (66.3)                                  | 0.91 (0.75-1.10)        | 101 (16.6)                                   | 1.06 (0.83-1.35)        | 371 (61.0)       | 0.91 (0.75-1.10)        |
| <b>Working status</b>       |                                             |                         |                                              |                         |                  |                         |
| Employed, but not as HCP    | 3,737 (66.8)                                | Reference               | 905 (16.2)                                   | Reference               | 3,667 (65.6)     | Reference               |
| HCP                         | 934 (74.4)                                  | <b>1.41 (1.23-1.63)</b> | 240 (19.1)                                   | 1.13 (0.96-1.33)        | 944 (75.2)       | <b>1.42 (1.23-1.64)</b> |
| Student                     | 592 (69.1)                                  | 1.11 (0.94-1.31)        | 128 (14.9)                                   | 1.04 (0.84-1.30)        | 578 (67.4)       | 1.10 (0.93-1.30)        |
| Housewife                   | 608 (72.6)                                  | 1.14 (0.96-1.35)        | 170 (20.3)                                   | <b>1.34 (1.10-1.63)</b> | 577 (68.9)       | 1.05 (0.88-1.24)        |
| Job seeker                  | 281 (66.0)                                  | 0.96 (0.78-1.20)        | 66 (15.5)                                    | 1.03 (0.78-1.36)        | 258 (60.6)       | 0.85 (0.68-1.05)        |
| Other than above            | 311 (65.2)                                  | 0.91 (0.75-1.12)        | 94 (19.7)                                    | <b>1.29 (1.01-1.65)</b> | 302 (63.3)       | 0.91 (0.74-1.12)        |
| <b>Educational level</b>    |                                             |                         |                                              |                         |                  |                         |

|                                                                                             | Medication use                              |                         |                                              |                         |                  |                         |
|---------------------------------------------------------------------------------------------|---------------------------------------------|-------------------------|----------------------------------------------|-------------------------|------------------|-------------------------|
|                                                                                             | For acute/short-term illnesses<br>(n=6,469) |                         | For chronic/long-term disorders<br>(n=1,604) |                         | OTC<br>(n=6,331) |                         |
|                                                                                             | n (%)                                       | aOR (95% CI)            | n (%)                                        | aOR (95% CI)            | n (%)            | aOR (95% CI)            |
| High school                                                                                 | 1,864 (68.7)                                | Reference               | 428 (15.8)                                   | Reference               | 1,779 (65.6)     | Reference               |
| Less than high school                                                                       | 331 (72.7)                                  | 1.17 (0.93-1.49)        | 92 (20.2)                                    | <b>1.51 (1.15-1.97)</b> | 317 (69.7)       | <b>1.32 (1.04-1.67)</b> |
| More than high school                                                                       | 3,574 (68.4)                                | 0.99 (0.89-1.11)        | 916 (17.5)                                   | 1.04 (0.91-1.20)        | 3,489 (66.8)     | 1.07 (0.96-1.19)        |
| Others, unspecified                                                                         | 700 (65.7)                                  | 0.82 (0.70-0.96)        | 168 (15.8)                                   | 0.94 (0.77-1.16)        | 746 (70.0)       | 1.13 (0.97-1.33)        |
| <b>Alcohol use after awareness of pregnancy</b>                                             |                                             |                         |                                              |                         |                  |                         |
| No                                                                                          | 5,270 (67.1)                                | Reference               | 1,322 (16.8)                                 | Reference               | 5,133 (65.3)     | Reference               |
| Yes                                                                                         | 1,144 (75.7)                                | <b>1.59 (1.39-1.81)</b> | 270 (17.9)                                   | 1.11 (0.95-1.29)        | 1,150 (76.1)     | <b>1.95 (1.71-2.23)</b> |
| <b>Smoking during pregnancy</b>                                                             |                                             |                         |                                              |                         |                  |                         |
| No                                                                                          | 5,835 (68.5)                                | Reference               | 1,441 (16.9)                                 | Reference               | 5,716 (67.0)     | Reference               |
| Yes, but less than before pregnancy                                                         | 530 (69.0)                                  | 1.08 (0.91-1.27)        | 130 (16.9)                                   | 1.01 (0.82-1.25)        | 511 (66.5)       | 1.06 (0.90-1.26)        |
| Yes, the same or more than before pregnancy                                                 | 88 (67.7)                                   | 0.95 (0.64-1.40)        | 28 (21.5)                                    | 1.19 (0.74-1.90)        | 89 (68.5)        | 1.21 (0.81-1.82)        |
| <b>Planned pregnancy</b>                                                                    |                                             |                         |                                              |                         |                  |                         |
| Yes                                                                                         | 5,836 (68.4)                                | Reference               | 1,427 (16.7)                                 | Reference               | 5,727 (67.2)     | Reference               |
| No                                                                                          | 616 (68.4)                                  | 0.96 (0.82-1.12)        | 173 (19.2)                                   | <b>1.29 (1.06-1.56)</b> | 587 (65.1)       | 1.00 (0.85-1.17)        |
| <b>First language different from the official main language in the country of residency</b> |                                             |                         |                                              |                         |                  |                         |
| No                                                                                          | 6,089 (68.5)                                | Reference               | 1,530 (17.2)                                 | Reference               | 5,972 (67.1)     | Reference               |
| Yes                                                                                         | 363 (67.2)                                  | 0.93 (0.76-1.12)        | 71 (13.1)                                    | <b>0.66 (0.50-0.86)</b> | 347 (64.3)       | 0.89 (0.74-1.08)        |

Abbreviation: HCP: health care provider.

\*Numbers may not add up due to missing values. Missing values are less than 5% of the total. Mineral supplements, vitamins, iron, herbal or alternative medicine products are not included in the medication use estimates.

†Countries are grouped into regions as shown in Figure 1.

## DISCUSSION

This is the first internet-based study examining patterns and determinants of medication use during pregnancy on a multinational level. In specific countries (Australia, Canada, France, Russia, The Netherlands, and the USA) the study sample was a small proportion of the general birthing population; hence the generalizability of our findings for these specific countries should be interpreted with caution. In all regions, approximately eight out of ten women reported use of at least one medication, either prescribed or OTC, during the course of their pregnancy. This finding is in line with previous research conducted in Europe, North America, South America and Australia,[4,18-23] though our estimates were somewhat higher in some of the Eastern European countries, e.g. Serbia, than those observed in a previous study.[5] Different recruitment strategies, i.e. internet-based in our study versus maternity care unit-/community pharmacy-based in the previous study could explain such discrepancy.

Overall, analgesics, antacids, nasal decongestants/antiallergics and systemic antibiotics were the medication groups dominating the drug utilization scenario, as also shown by previous research.[4,18-20] However, our study also provides insights into the proportion of medicated women among those suffering from a specific illness during pregnancy across the six regions. We found that approximately seven out of ten women who reported UTIs were treated with antibiotics during pregnancy. This related to all regions, except Eastern Europe where it was only four out of ten women. Since women may perceive dysuria without ascertainment of bacteriuria in the urine as UTI, an over-reporting of the illness could have occurred. Yet, a sub-optimal treatment of UTIs during pregnancy in Eastern Europe cannot be ruled out. The inter-country variability in the types of antibiotics used for UTIs could simply be explained by differences in prescribing practice,[24] presence of screening for bacteriuria in early pregnancy, or specific antibiotic resistance patterns.

1  
2  
3 Even though nausea was the condition affecting most women in all six regions, the  
4  
5 corresponding proportions of medicated nausea were generally low. This scenario is probably  
6  
7 due to two main factors: a) the predominantly mild character of nausea and the possibility of  
8  
9 non-pharmacological management (e.g. dietary advices); b) the reluctance of general  
10  
11 practitioners to prescribe antiemetics even though safety profile assessments are in  
12  
13 place.[25,26] As also shown in previous studies,[4,27] use of serotonin antagonists in North  
14  
15 America and Australia is increasing also in pregnancy compared to the other regions, eliciting  
16  
17 the need of sound studies assessing the safety profile of this drug group in pregnancy.  
18  
19

20  
21 In most regions, the self-reported prevalence of hypothyroidism was somewhat higher than  
22  
23 the reported hormone substitution rate. Because of its known association with adverse  
24  
25 pregnancy outcomes,[28] the unexpected finding of potential sub-optimal treatment of  
26  
27 hypothyroidism during pregnancy deserves attention. It could probably be due to a lack of  
28  
29 information about hypothyroidism typology and its diagnostic ascertainment in our study.  
30  
31

32  
33 In our study, depression was self-reported and not based on any psychometric assessment,  
34  
35 thus the observed substantial inter-regional variability in the extent of this disorder and related  
36  
37 medication use could have certainly been affected by women's attitudes in reporting. Our  
38  
39 estimate of medication use for depression in Australia was higher than that observed in a  
40  
41 recent study (10.6% versus 2.1%).[29] However, the similarity in self-reported depression  
42  
43 itself (11.5% versus 15.6%) suggests that our population might mostly comprise women who  
44  
45 did not discontinue their pharmacological therapy once they became pregnant. Our estimates  
46  
47 for North America and Western Europe were in line with recent literature showing an increase  
48  
49 in antidepressant use in pregnancy during the last years.[4,30]  
50  
51

52  
53 In most regions approximately 60-70% of women reported use of at least one OTC  
54  
55 medication during the course of their pregnancy, mostly for pain conditions, heartburn and  
56  
57

1  
2  
3 upper airways disorders, indicating a substantially high rate of self-medication during  
4  
5 pregnancy. This estimate aligns with previous research carried out in North America.[31] Of  
6  
7 note, self-medication with OTC sympathomimetic nasal decongestants was more extensive in  
8  
9 Northern and Eastern Europe than in the remaining regions; this could be explained by the  
10  
11 time of the year when the data collection was performed.  
12  
13

14  
15 Region of residency was an important factor associated with medication use during pregnancy.  
16  
17 As also shown by Cleary et al.,[32] we found that rates of medication use among women  
18  
19 originally from Eastern Europe and South America were significantly lower than those  
20  
21 observed in Western Europe, North America and Australia. Such geographical differences  
22  
23 could be due to culture, variations in prenatal care assistance or access to medications in the  
24  
25 various regions and the related costs.  
26  
27

28  
29 Women working as health care providers, those consuming alcohol during pregnancy and  
30  
31 those with previous children were those more likely to use short-term and OTC medications,  
32  
33 possibly reflecting higher confidence in self-treatment and use of medications in general in  
34  
35 the former instance, and less anxiety for the pregnancy outcome in the latter two instances.  
36  
37 One factor negatively associated with chronic/long-term medication use was not having the  
38  
39 official language of the country of residency as mother tongue. This tendency was detected in  
40  
41 Western and Northern Europe, rising concerns about the potential health risks for immigrant  
42  
43 women in these two regions. As shown by Hameen-Anttila et al., 57% of pregnant women  
44  
45 have perceived information needs about medications during pregnancy.[33] Thus,  
46  
47 identification of potential users or non-users of medication during pregnancy might be of  
48  
49 clinical relevance, allowing tailored evidence-based information about medication safety or  
50  
51 outcome of sub-optimal medication of severe medical conditions in pregnancy.  
52  
53  
54  
55  
56  
57  
58  
59  
60

### Strengths and limitations

The main strength is that data collection was performed uniformly across all participating countries, allowing for inter-country comparison of the prevalence of medication use during pregnancy. By quantifying the extent of self-medication with OTC drugs and medication use according to self-reported indication, it was possible to determine the leading causes for medication use among pregnant women. Categorization of maternal characteristics positively associated with the various types of medications used during pregnancy enabled us to identify which groups of women are more likely to need information about medication use during pregnancy. The utilization of an anonymous web-based questionnaire enabled us to reach a large proportion of the birthing population in several countries worldwide. However, we cannot exclude the possibility that the women who decided to participate in the study differed from the general birthing population in other ways that our analysis could not control for.

One main limitation of the study is the lack of validity of the self-reported diagnoses. All disorders were self-reported by the participants and hence dependent on the women's perception of the medical condition. Similarly, information about medication use during pregnancy was dependent on the accuracy of the women's reporting and recall. For new mothers, data were registered retrospectively; hence a risk of recall bias cannot be ruled out. The questionnaire was only available through internet websites; by using this kind of approach a conventional response rate cannot be calculated. However, recent epidemiological studies indicate reasonable validity of web-based recruitment methods.[34,35] Also, the penetration rate of the internet either in households or at work is relatively high among women in childbearing age.[36-40] Hence, the degree to which our findings can be extrapolated to the target population is based on the representativeness of the respondents to the general birthing populations in each country. The sample in each country had a somewhat



1  
2  
3 higher educational level than the general birthing populations. Inclusion of pregnant women at  
4  
5 any gestational week might have inflated the prevalence of non-users of medications during  
6  
7 pregnancy. Also, women with specific disorders or in need of information about medication  
8  
9 use during pregnancy might have been more likely to consult internet websites and therefore  
10  
11 participate in this study.  
12

## 13 14 15 **CONCLUSIONS**

16  
17 Use of medications for acute and chronic disorders as well as use of OTC medications, were  
18  
19 common during pregnancy. The extent of medicated illnesses and types of medications used  
20  
21 for the different indications varied across the six regions. This was especially relevant for  
22  
23 acute/short-term illnesses such as nausea and UTIs, but also for chronic/long-term disorders  
24  
25 such as hypothyroidism or depression. Women with higher age or lower educational level,  
26  
27 housewives, or women with an unplanned pregnancy were those most often reporting use of  
28  
29 chronic/long-term medication and may therefore be more in need of information about  
30  
31 medication during pregnancy. Moreover, maternal-fetal health among immigrants residing in  
32  
33 Western and Northern Europe might be jeopardized. Future research should definitely focus  
34  
35 on this specific group of women, but also address more insights into the outcome of sub-  
36  
37 optimal medication of severe conditions in pregnancy.  
38  
39  
40  
41  
42  
43  
44  
45  
46  
47  
48  
49  
50  
51  
52  
53  
54  
55  
56  
57  
58  
59  
60

## ACKNOWLEDGMENTS

We thank OTIS, ENTIS Scientific Board who reviewed the study protocol and all website providers who contributed to the recruitment phase. We are grateful to all the participating women who took part in this study.

**AUTHOR'S CONTRIBUTION:** AL, OS and HN conceived the idea for the study and participated in its design and coordination. AL drafted the manuscript and analyzed the data. MJT, KZ, ACM, MEM, MD, AP, KHA, AR, RGJ, MO, DK, GR, HJ, AP and IB contributed to the data collection. All authors contributed to the interpretation of the results and revised the manuscript critically for important intellectual content. All the authors read and approved the final manuscript.

**DATA SHARING STATEMENT:** No additional data are available. Researchers can apply for data access for subprojects within the overall aims of the main study 'Medication Use in Pregnancy—an International Study'.

**REFERENCES**

1. ACOG Committee Opinion No. 377: Research involving women. *Obstet Gynecol* 2007;**110**(3):731-6.
2. Adam MP, Polifka JE, Friedman JM. Evolving knowledge of the teratogenicity of medications in human pregnancy. *Am J Med Genet C Semin Med Genet* 2011;**157**(3):175-82.
3. Briggs GG, Freeman RK, Yaffe SJ, editors. *Drugs in pregnancy and lactation*. [S.l.]: Lippincott Williams & Wilkins, 2011.
4. Mitchell AA, Gilboa SM, Werler MM, et al. Medication use during pregnancy, with particular focus on prescription drugs: 1976-2008. *Am J Obstet Gynecol* 2011;**205**(1):51 e1-8.
5. Odalovic M, Vezmar Kovacevic S, Ilic K, et al. Drug use before and during pregnancy in Serbia. *Int J Clin Pharm* 2012;**34**(5):719-27.
6. Gagne JJ, Maio V, Berghella V, et al. Prescription drug use during pregnancy: a population-based study in Regione Emilia-Romagna, Italy. *Eur J Clin Pharmacol* 2008;**64**(11):1125-32.
7. Engeland A, Bramness JG, Daltveit AK, et al. Prescription drug use among fathers and mothers before and during pregnancy. A population-based cohort study of 106,000 pregnancies in Norway 2004-2006. *Br J Clin Pharmacol* 2008;**65**(5):653-60.
8. Bakker MK, Jentink J, Vroom F, et al. Drug prescription patterns before, during and after pregnancy for chronic, occasional and pregnancy-related drugs in the Netherlands. *BJOG* 2006;**113**(5):559-68.
9. Lacroix I, Hurault C, Sarramon MF, et al. Prescription of drugs during pregnancy: a study using EFEMERIS, the new French database. *Eur J Clin Pharmacol* 2009;**65**(8):839-46.
10. Malm H, Martikainen J, Klaukka T, et al. Prescription drugs during pregnancy and lactation--a Finnish register-based study. *Eur J Clin Pharmacol* 2003;**59**(2):127-33.

11. Daw JR, Hanley GE, Greyson DL, et al. Prescription drug use during pregnancy in developed countries: a systematic review. *Pharmacoepidemiol Drug Saf* 2011;**20**(9):895-902.
12. Rubin JD, Ferencz C, Loffredo C. Use of prescription and non-prescription drugs in pregnancy. *J Clin Epidemiol* 1993;**46**(6):581-89.
13. McKenna L, McIntyre M. What over-the-counter preparations are pregnant women taking? A literature review. *J Adv Nurs* 2006;**56**(6):636-45.
14. Odalovic M, Vezmar Kovacevic S, Nordeng H, et al. Predictors of the use of medications before and during pregnancy. *Int J Clin Pharm* 2013;**35**(3):408-16.
15. Martindale W, Sweetman SC. *Martindale : the complete drug reference*. London: Pharmaceutical Press, 2011:2 b. : ill.
16. WHO Collaborating Centre for Drugs Statistics Methodology. ATC/DDD index 2012. [http://www.whocc.no/atc\\_ddd\\_index/](http://www.whocc.no/atc_ddd_index/) (accessed 17 March, 2012).
17. Hosmer DW, Lemeshow S, editors. *Applied logistic regression*. 2nd ed. New York: Wiley-Interscience, 2000.
18. Nordeng H, Ystrøm E, Einarson A. Perception of risk regarding the use of medications and other exposures during pregnancy. *Eur J Clin Pharmacol* 2010;**66**(2):207-14.
19. Headley J, Northstone K, Simmons H, et al. Medication use during pregnancy: data from the Avon Longitudinal Study of Parents and Children. *Eur J Clin Pharmacol* 2004;**60**(5):355-61.
20. Medication during pregnancy: an intercontinental cooperative study. Collaborative Group on Drug Use in Pregnancy (C.G.D.U.P.). *Int J Gynaecol Obstet* 1992;**39**(3):185-96.
21. Donati S, Baglio G, Spinelli A, et al. Drug use in pregnancy among Italian women. *Eur J Clin Pharmacol* 2000;**56**(4):323-8.
22. Henry A, Crowther C. Patterns of medication use during and prior to pregnancy: the MAP study. *Aust N Z J Obstet Gynaecol* 2000;**40**(2):165-72.

- 1  
2  
3 23. Marín G, Cañas M, Homar C, et al. Uso de fármacos durante el período de gestación en  
4 embarazadas de Buenos Aires, Argentina. *Rev salud pública* 2010;**12**(5):722-31.  
5  
6  
7 24. European Centre for Disease Prevention and Control. Surveillance of antimicrobial  
8 consumption in Europe, 2010. Stockholm: ECDC, 2013.  
9  
10  
11 25. Smith J, Refuerzo J, Ramin S. Treatment and outcome of nausea and vomiting of  
12 pregnancy. In: Basow D, ed. UpToDate. Waltham, MA: UpToDate, 2013.  
13  
14 26. Gadsby R, Barnie-Adshead T, Sykes C. Why won't doctors prescribe antiemetics in  
15 pregnancy? *BMJ* 2011;**343**:d4387.  
16  
17  
18 27. Raymond SH. A survey of prescribing for the management of nausea and vomiting in  
19 pregnancy in Australasia. *Aust N Z J Obstet Gynaecol* 2013.  
20  
21  
22 28. Ross DS. Hypothyroidism during pregnancy: Clinical manifestations, diagnosis, and  
23 treatment. In: Basow DS, ed. UpToDate. Waltham, MA: UpToDate, 2013.  
24  
25  
26 29. Lewis AJ, Bailey C, Galbally M. Anti-depressant use during pregnancy in Australia:  
27 findings from the Longitudinal Study of Australian Children. *Aust N Z J Public Health*  
28 2012;**36**(5):487-8.  
29  
30  
31 30. Petersen I, Gilbert RE, Evans SJ, et al. Pregnancy as a major determinant for  
32 discontinuation of antidepressants: an analysis of data from The Health Improvement  
33 Network. *J Clin Psychiatry* 2011;**72**(7):979-85.  
34  
35  
36 31. Refuerzo JS, Blackwell SC, Sokol RJ, et al. Use of Over-the-Counter Medications and  
37 Herbal Remedies in Pregnancy. *Amer J Perinatol* 2005;**22**(EFirst):321,24.  
38  
39  
40 32. Cleary BJ, Butt H, Strawbridge JD, et al. Medication use in early pregnancy-prevalence  
41 and determinants of use in a prospective cohort of women. *Pharmacoepidemiol Drug Saf*  
42 2010;**19**(4):408-17.  
43  
44  
45 33. Hameen-Anttila K, Jyrkka J, Enlund H, et al. Medicines information needs during  
46 pregnancy: a multinational comparison. *BMJ open* 2013;**3**(4).  
47  
48  
49  
50  
51  
52  
53  
54  
55  
56  
57  
58  
59  
60

- 1  
2  
3 34. Ekman A, Dickman P, Klint Å, et al. Feasibility of Using Web-based Questionnaires in  
4 Large Population-based Epidemiological Studies. *Eur J Epidemiol* 2006;**21**(2):103-11.  
5  
6  
7 35. van Gelder MM, Bretveld RW, Roeleveld N. Web-based questionnaires: the future in  
8 epidemiology? *Am J Epidemiol* 2010;**172**(11):1292-8.  
9  
10  
11 36. Seybert H. Internet use in households and by individuals in 2011. Eurostat Statistics in  
12 focus. 2011. [http://epp.eurostat.ec.europa.eu/cache/ITY\\_OFFPUB/KS-SF-11-066/EN/KS-](http://epp.eurostat.ec.europa.eu/cache/ITY_OFFPUB/KS-SF-11-066/EN/KS-SF-11-066-EN.PDF)  
13 [SF-11-066-EN.PDF](http://epp.eurostat.ec.europa.eu/cache/ITY_OFFPUB/KS-SF-11-066/EN/KS-SF-11-066-EN.PDF) (accessed 13 November, 2012).  
14  
15  
16 37. Internet World Stats. Usage and population statistics. 2012.  
17  
18 <http://www.internetworldstats.com/> (accessed 13 November, 2012).  
19  
20  
21  
22 38. Australian Bureau of Statistics. Household Use of Information Technology, Australia,  
23 2010-11  
24  
25 [http://www.abs.gov.au/ausstats/abs@.nsf/Latestproducts/8146.0Main%20Features12010-](http://www.abs.gov.au/ausstats/abs@.nsf/Latestproducts/8146.0Main%20Features12010-11?opendocument&tabname=Summary&prodno=8146.0&issue=2010-11&num=&view=)  
26 [11?opendocument&tabname=Summary&prodno=8146.0&issue=2010-11&num=&view=](http://www.abs.gov.au/ausstats/abs@.nsf/Latestproducts/8146.0Main%20Features12010-11?opendocument&tabname=Summary&prodno=8146.0&issue=2010-11&num=&view=)  
27 (accessed 13 November, 2012).  
28  
29  
30  
31  
32  
33 39. Statistics Canada. Individual Internet use and E-commerce (2010). 2011.  
34  
35 <http://www.statcan.gc.ca/daily-quotidien/111012/dq111012a-eng.htm> (accessed November  
36 13th, 2012).  
37  
38  
39  
40 40. United States Census Bureau. The 2012 Statistical Abstract. Information &  
41 Communications: Internet Publishing and Broadcasting and Internet Usage. 2010.  
42  
43 [http://www.census.gov/compendia/statab/cats/information\\_communications/internet\\_publishi](http://www.census.gov/compendia/statab/cats/information_communications/internet_publishing_and_broadcasting_and_internet_usage.html)  
44 [ng\\_and\\_broadcasting\\_and\\_internet\\_usage.html](http://www.census.gov/compendia/statab/cats/information_communications/internet_publishing_and_broadcasting_and_internet_usage.html) (accessed 13 November, 2012).  
45  
46  
47  
48  
49  
50  
51  
52  
53  
54  
55  
56  
57  
58  
59  
60

**Figure 1:** Participant flow-chart to achieve the final sample analyzed

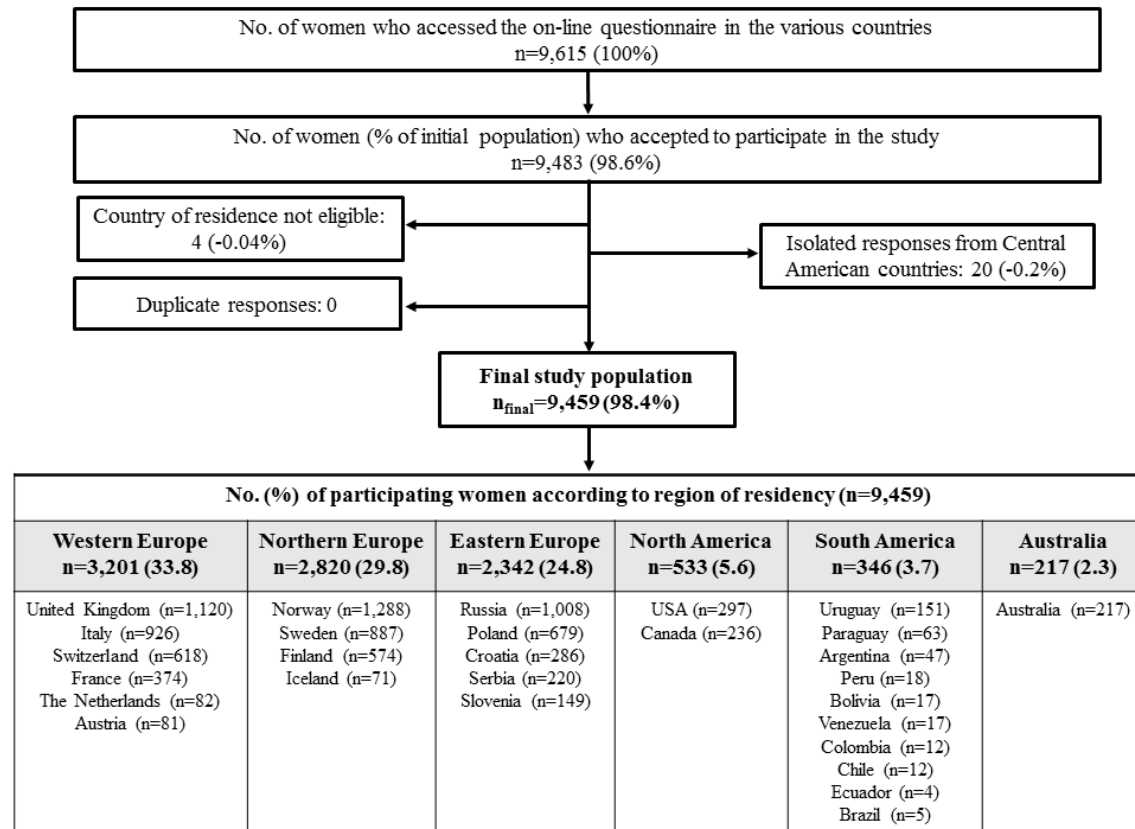

view only

**Figure 2:** Proportion of respondents reporting use of any medication - prescribed and/or OTC - during pregnancy (%), including and excluding vitamins, mineral supplements and iron, and proportion of respondents reporting OTC medication use during pregnancy, according to region and country of residency

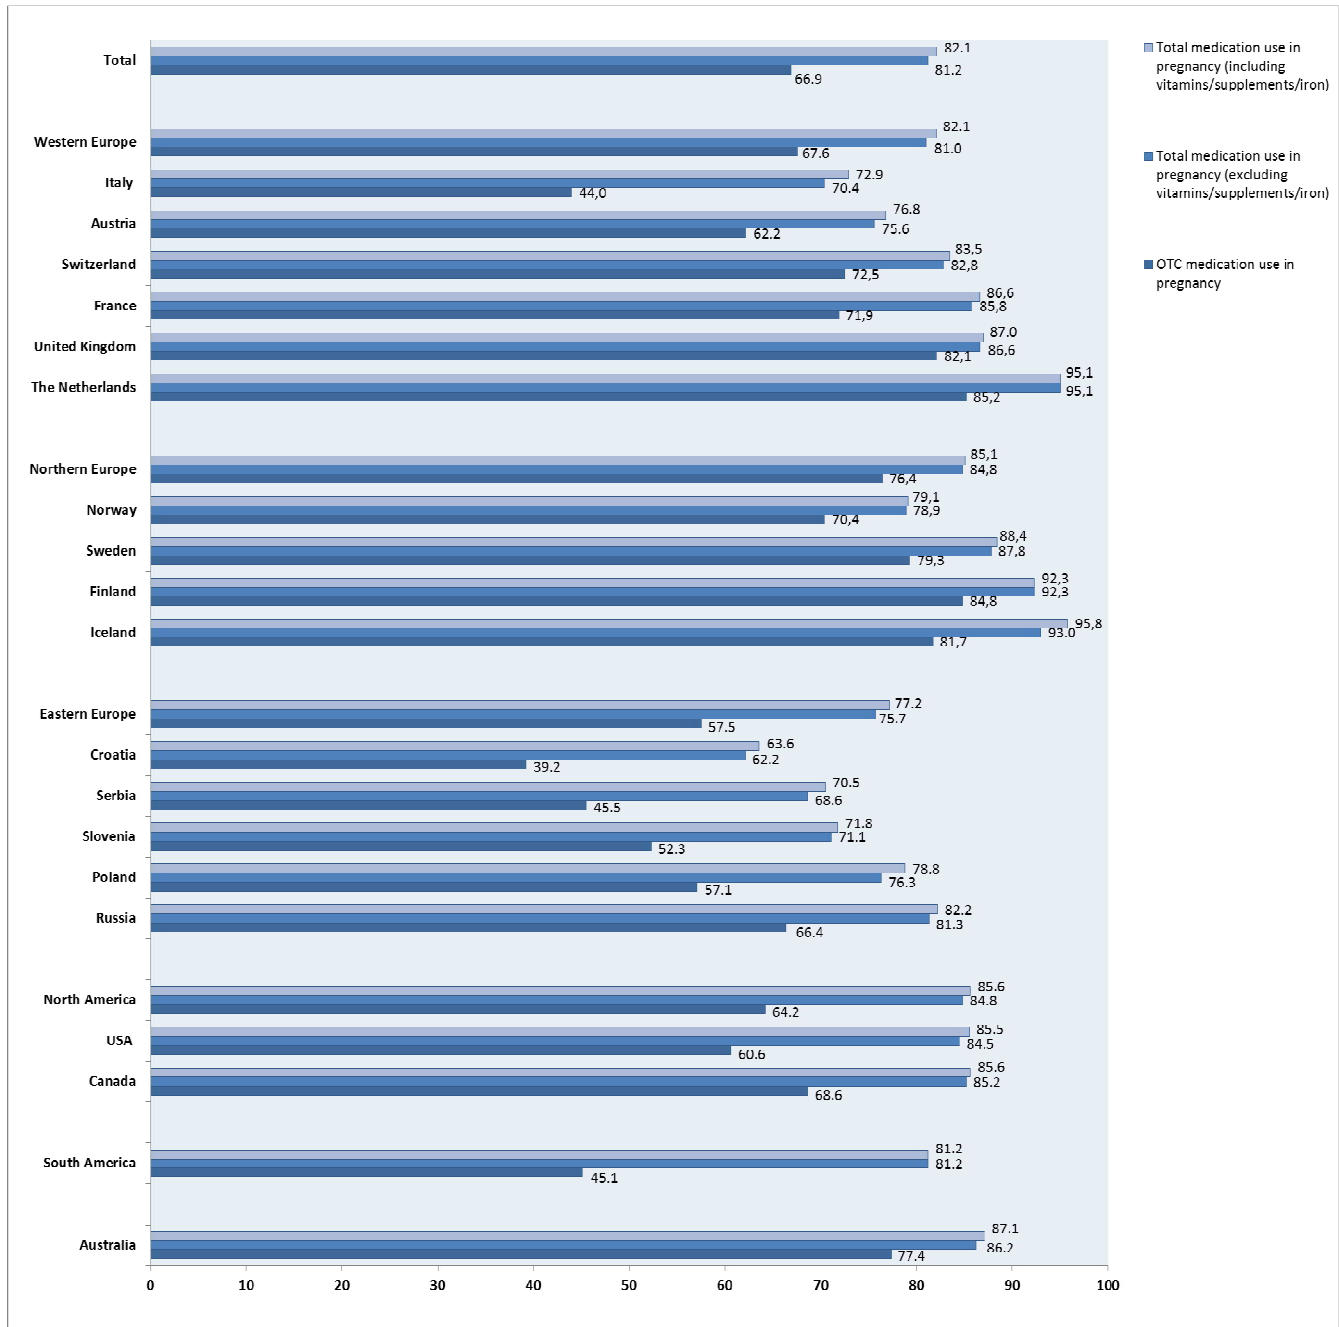



**Appendix 1: Websites used for recruitment and internet penetration rates in each participating country**

| <i>Country</i>         | <i>Website used for recruitment</i>                                                                                                                                                                                        | <i>Internet penetration rates*</i> |
|------------------------|----------------------------------------------------------------------------------------------------------------------------------------------------------------------------------------------------------------------------|------------------------------------|
| <b>Western Europe</b>  |                                                                                                                                                                                                                            |                                    |
| United Kingdom         | <i>Targeted email to pregnancy forum subscribers:</i><br>www.bounty.com<br><br><i>Pregnancy Forums:</i> www.pregnancyforum.co.uk;<br>www.pregnancyforum.org.uk                                                             | 93% <sup>1</sup>                   |
| Italy                  | <i>Pregnancy Forums:</i> www.gravidanzaonline.it;<br>www.forumsalute.it; www.mammole.it;<br>www.pianetamamma.it; www.miobambino.it<br><br><i>Targeted email to pregnancy forum subscribers:</i><br>www.gravidanzaonline.it | 70% <sup>1</sup>                   |
| Switzerland            | www.bebe-bebe.com; www.swissmom.ch                                                                                                                                                                                         | 84.2% <sup>2</sup>                 |
| France                 | www.aufeminin.com ( <i>Including ipad application to website subscribers</i> )                                                                                                                                             | 91% <sup>1</sup>                   |
| The Netherlands        | www.lareb.nl; www.gezondzwangerzijn.nl;<br>www.babybytes.nl                                                                                                                                                                | 98% <sup>1</sup>                   |
| Austria                | www.schwangerschaft.at; www.schwangerschafts-blog.at;<br>www.fratz.at; www.netdoctor.at; www.babycenter.at;<br>www.baby-boom.at; www.ekiz-dachverband.at;<br>www.babyguide.at                                              | 93% <sup>1</sup>                   |
| <b>Northern Europe</b> |                                                                                                                                                                                                                            |                                    |
| Norway                 | www.barnimagen.com; www.klikk.no; www.jormorsiri.no;<br>www.tryggmamedisin.no                                                                                                                                              | 99% <sup>1</sup>                   |
| Sweden                 | www.barntotal.se; www.minbebis.com;<br>www.se.babycenter.com; www.socmed.gu.se                                                                                                                                             | 99% <sup>1</sup>                   |
| Finland                | www.vauva.fi; www.meidanperhe.fi; www.kaksplus.fi                                                                                                                                                                          | 99% <sup>1</sup>                   |
| Iceland                | <i>Pregnancy Forums:</i> www.bland.is                                                                                                                                                                                      | 100% <sup>1</sup>                  |
| <b>Eastern Europe</b>  |                                                                                                                                                                                                                            |                                    |
| Russia                 | www.babyblog.ru; www.littleone.ru<br><br><i>Pregnancy Forums:</i> www.woman.ru; www.9months.ru;<br>www.bemam; www.280dney.ru; www.iampregnant.ru<br>www.pregnancy.org.ua; www.baby.ru; www.mama66.ru;<br>www.spuzom.ru     | 47.7% <sup>2</sup>                 |
| Poland                 | www.zzief.umlub.pl<br><br><i>Pregnancy Forums:</i> www.ebrzuszek.pl; www.babyboom.pl;<br>www.zapytajpolozna.pl; www.planujemydziecko.pl;<br>www.twoja-ciaza.com.pl                                                         | 84% <sup>1</sup>                   |
| Croatia                | www.cybermed.hr                                                                                                                                                                                                            | 80% <sup>1</sup> (data from 2010)  |

| <i>Country</i> | <i>Website used for recruitment</i>        | <i>Internet penetration rates*</i> |
|----------------|--------------------------------------------|------------------------------------|
| Serbia         | www.ringeraja.rs                           | 52% <sup>1</sup> (data from 2009)  |
| Slovenia       | <i>Pregnancy Forums</i> : www.med.over.net | 92% <sup>1</sup>                   |

\*Indicates the frequency of internet access - at least once a week, including every day - among individuals aged 25- 34 years. Differences between men and women were relatively small. Slightly more than two thirds of men (70%) and 65% of women used the Internet regularly.

| <i>Country</i>       | <i>Website used for recruitment</i>                                                                                                                                                                                                         | <i>Internet penetration rates</i>                      |
|----------------------|---------------------------------------------------------------------------------------------------------------------------------------------------------------------------------------------------------------------------------------------|--------------------------------------------------------|
| <b>North America</b> |                                                                                                                                                                                                                                             |                                                        |
| USA/Canada           | www.otispregnancy.org; Facebook page of OTIS;<br>www.babyontheway.com.ca; www.justmommies.com<br><br><i>Pregnancy Forums</i> : www.babyandbump.com<br>www.babycentre.com.ca; www.thecradle.com;<br>www.talk.sheknows.com; www.parenting.com | Canada: 94% <sup>3**</sup><br>USA: 80.2% <sup>4§</sup> |
| <b>South America</b> | www.otispregnancy.org; Facebook page of OTIS<br><br><i>Pregnancy Forums</i> : www.semanaasemana.com;<br>www.univision.com; www.eleambarazo.net                                                                                              | South America: 48.2% <sup>2</sup>                      |

\*\* Indicates individuals aged 16-45 years who used the internet for personal use.

§ Indicates individuals > 18 years old, access from anywhere; household internet for women is equal to 68.1%; higher percentages are observed for people aged 25-54 years.

| <i>Country</i>   | <i>Website used for recruitment</i>                                                                               | <i>Internet penetration rates<sup>§§</sup></i> |
|------------------|-------------------------------------------------------------------------------------------------------------------|------------------------------------------------|
| <b>Australia</b> | www.mothersafe.org.au; www.bubhub.com.au<br><br><i>Pregnancy Forums</i> : www.abds.org.au;<br>www.birthing.com.au | 83% <sup>5</sup>                               |

§§ Indicates households with access to the internet at home.

#### Sources of internet penetration rates:

1. Seybert H. Internet use in households and by individuals in 2011. Eurostat Statistics in focus; 2011.
2. Internet World Stats. Usage and population statistics. Available at: <http://www.internetworldstats.com/>. Accessed November 20, 2012.
3. Statistics Canada. Individual Internet use and E-commerce (2010). Available at: <http://www.statcan.gc.ca/daily-quotidien/111012/dq111012a-eng.htm>. Accessed November 20, 2012.
4. United States Census Bureau. The 2012 Statistical Abstract. Information & Communications: Internet Publishing and Broadcasting and Internet Usage. Available at: [http://www.census.gov/compendia/statab/cats/information\\_communications/internet\\_publishing\\_and\\_broadcasting\\_and\\_internet\\_usage.html](http://www.census.gov/compendia/statab/cats/information_communications/internet_publishing_and_broadcasting_and_internet_usage.html). Accessed November 13th, 2012.
5. Australian Bureau of Statistics. Household Use of Information Technology, Australia, 2010-11 Available at: <http://www.abs.gov.au/ausstats/abs@.nsf/Latestproducts/8146.0Main%20Features12010-11?opendocument&tabname=Summary&prodno=8146.0&issue=2010-11&num=&view=>. Accessed November 13, 2012.

**Appendix 2:** Socio-demographic characteristics of the study population and general birthing population on individual country<sup>†</sup>

**Appendix 2a:** Socio-demographic characteristics in Western European countries (United Kingdom (UK), Italy and Switzerland)

|                                             | Study sample<br>in the UK<br>n=1,120<br>(%) | General birthing<br>population in<br>UK*<br>LB=723,165 <sup>1</sup><br>(%) | Study sample<br>in Italy<br>n=926<br>(%) | General birthing<br>population in<br>Italy<br>LB=546,606 <sup>2</sup><br>(%) | Study sample<br>in Switzerland<br>n=618<br>(%) | General birthing<br>population in<br>Switzerland<br>LB=80,808 <sup>2</sup><br>(%) |
|---------------------------------------------|---------------------------------------------|----------------------------------------------------------------------------|------------------------------------------|------------------------------------------------------------------------------|------------------------------------------------|-----------------------------------------------------------------------------------|
| <b>Mean Age ± sd</b>                        | 30.5 ± 5.2                                  | 29.6 <sup>1</sup>                                                          | 32.3 ± 5.0                               | 31.3 <sup>3</sup>                                                            | 31.6 ± 4.3                                     | 31.4 <sup>4</sup>                                                                 |
| <b>Marital status</b>                       |                                             |                                                                            |                                          |                                                                              |                                                |                                                                                   |
| In marriage                                 | 63.3                                        | 53.2 <sup>1</sup>                                                          | 68.8                                     | 75.1 <sup>2</sup>                                                            | 80.0                                           | 80.7 <sup>4</sup>                                                                 |
| Outside marriage                            | 36.7                                        | 46.8 <sup>1</sup>                                                          | 31.2                                     | 31.5 <sup>2</sup>                                                            | 20.0                                           | 19.3 <sup>4</sup>                                                                 |
| <b>Parity</b>                               |                                             |                                                                            |                                          |                                                                              |                                                |                                                                                   |
| No previous children                        | 48.0 <sup>†</sup>                           | 41.9 <sup>1 †</sup>                                                        | 59.7                                     | 48.7 <sup>5</sup>                                                            | 53.2                                           | -                                                                                 |
| <b>Educational level</b>                    |                                             |                                                                            |                                          |                                                                              |                                                |                                                                                   |
| Less than high school                       | 0.6                                         | 16.5 <sup>1</sup>                                                          | 7.0                                      | 25.2 <sup>6</sup>                                                            | 11.0                                           | 11.7 <sup>6</sup>                                                                 |
| High school                                 | 27.9                                        | 37.2 <sup>1</sup>                                                          | 47.2                                     | 49.2 <sup>6</sup>                                                            | 13.6                                           | 49.2 <sup>6</sup>                                                                 |
| More than high school                       | 52.1                                        | 46.3 <sup>1</sup>                                                          | 44.3                                     | 25.6 <sup>6</sup>                                                            | 47.2                                           | 39.1 <sup>6</sup>                                                                 |
| Other                                       | 19.3                                        | -                                                                          | 1.5                                      | -                                                                            | 28.2                                           | -                                                                                 |
| <b>Women smoking before pregnancy</b>       | 25.2                                        | 25.7 <sup>7</sup>                                                          | 34.2                                     | 33.3 <sup>3</sup>                                                            | 25.1                                           | 25.4 <sup>7</sup>                                                                 |
| <b>Women smoking during pregnancy</b>       | 7.1 <sup>‡</sup>                            | 13.2 <sup>8 ‡</sup>                                                        | 10.5                                     | 22.7 <sup>9</sup>                                                            | 5.5                                            | 6.6 <sup>10</sup>                                                                 |
| <b>Use of alcohol during pregnancy</b>      | 28.3                                        | 24.0 <sup>11 §</sup>                                                       | 17.9                                     | 17.7 <sup>9</sup>                                                            | 20.7                                           | 29.9 <sup>10</sup>                                                                |
| <b>No. of respondents/No. live births**</b> | 0.9%                                        |                                                                            | 1.0%                                     |                                                                              | 4.6%                                           |                                                                                   |

Abbreviations: LB: Number of live births per year.

<sup>†</sup>No Statistics Bureaus reports/studies were found for South America.

\*The figures shown here are statistic estimates for England and Wales. Scotland and Northern Ireland have separate statistical reports. Since more than 85% of the study population in UK were resident in England and about 8% in Wales, we are only showing national statistic data for these two parts of the UK.

<sup>†</sup>Among married women only – as provided by the Statistics Bureau in the UK.

1  
2  
3  
4  
5  
6  
7  
8  
9  
10  
11  
12  
13  
14  
15  
16  
17  
18  
19  
20  
21  
22  
23  
24  
25  
26  
27  
28  
29  
30  
31  
32  
33  
34  
35  
36  
37  
38  
39  
40  
41  
42  
43  
44  
45  
46  
47  
48  
49

‡Among women resident in England only (as provided by the Statistics Bureau in the UK, data on 4<sup>th</sup> Quarter of 2011).

§Women reporting at least one occasion during pregnancy of consuming more than four drinks in a day.

\*\*The ratio “No. of respondents/No. live births” is calculated as the proportion (%) of pregnancies included in the study among live births in the country in two months (period of data collection).

For peer review only

**Appendix 2b:** Socio-demographic characteristics in Western European countries (France, The Netherlands and Austria)

|                                             | Study sample in<br>France<br>n=374<br>(%) | General birthing<br>population in<br>France<br>LB=824,263 <sup>2</sup><br>(%) | Study sample<br>in The<br>Netherlands<br>n=81<br>(%) | General birthing<br>population in The<br>Netherlands<br>LB=180,060 <sup>2</sup><br>(%) | Study<br>sample in<br>Austria<br>n=82<br>(%) | General birthing<br>population in<br>Austria<br>LB=78,109 <sup>2</sup><br>(%) |
|---------------------------------------------|-------------------------------------------|-------------------------------------------------------------------------------|------------------------------------------------------|----------------------------------------------------------------------------------------|----------------------------------------------|-------------------------------------------------------------------------------|
| <b>Mean Age ± sd</b>                        | 29.6 ± 4.9                                | 30.1 <sup>12</sup>                                                            | 32.0 ± 6.4                                           | 31.0 <sup>13</sup>                                                                     | 30.6 ± 4.6                                   | 30.0 <sup>14</sup>                                                            |
| <b>Marital status</b>                       |                                           |                                                                               |                                                      |                                                                                        |                                              |                                                                               |
| In marriage                                 | 48.9                                      | 45.0 <sup>2</sup>                                                             | 69.1                                                 | 58.2 <sup>13</sup>                                                                     | 48.8                                         | 59.6 <sup>15</sup>                                                            |
| Outside marriage                            | 51.1                                      | 55.0 <sup>2</sup>                                                             | 30.8                                                 | 41.8 <sup>13</sup>                                                                     | 51.2                                         | 40.4 <sup>15</sup>                                                            |
| <b>Parity</b>                               |                                           |                                                                               |                                                      |                                                                                        |                                              |                                                                               |
| No previous children                        | 52.9                                      | 44.2 <sup>16</sup>                                                            | 38.3                                                 | 46.4 <sup>13</sup>                                                                     | 63.4                                         | 47.96 <sup>15</sup>                                                           |
| <b>Educational level</b>                    |                                           |                                                                               |                                                      |                                                                                        |                                              |                                                                               |
| Less than high school                       | 1.6                                       | 15.4 <sup>6</sup>                                                             | 9.9                                                  | 15.9 <sup>6</sup>                                                                      | 9.8                                          | 13.3 <sup>6</sup>                                                             |
| High-school                                 | 25.1                                      | 37.4 <sup>6</sup>                                                             | 66.7                                                 | 40.2 <sup>6</sup>                                                                      | 32.9                                         | 64.1 <sup>6</sup>                                                             |
| More than high school                       | 57.0                                      | 47.2 <sup>6</sup>                                                             | 23.5                                                 | 43.9 <sup>6</sup>                                                                      | 40.2                                         | 22.7 <sup>6</sup>                                                             |
| Other                                       | 16.3                                      | -                                                                             | -                                                    | -                                                                                      | 17.1                                         | -                                                                             |
| <b>Women smoking before pregnancy</b>       | 39.3                                      | 39.0 <sup>16</sup>                                                            | 34.6                                                 | 29.5 <sup>7</sup>                                                                      | 31.7                                         | 32.1 <sup>17</sup>                                                            |
| <b>Women smoking during pregnancy</b>       | 14.2                                      | 28.0 <sup>16</sup>                                                            | 14.8                                                 | 17.1 <sup>18</sup>                                                                     | 4.9                                          | -                                                                             |
| <b>Use of alcohol during pregnancy</b>      | 11.5                                      | 52.0 <sup>19</sup>                                                            | 11.1                                                 | 16-35 <sup>13</sup>                                                                    | 13.4                                         | -                                                                             |
| <b>No. of respondents/No. live births *</b> | 0.3%                                      |                                                                               | 0.3%                                                 |                                                                                        | 0.6%                                         |                                                                               |

Abbreviations: LB: Number of live births per year.

\*The ratio “No. of respondents/No. live births” is calculated as the proportion (%) of pregnancies included in the study among live births in the country in two months (period of data collection).

## Appendix 2c: Socio-demographic characteristics in Northern European countries (Norway, Sweden and Finland)

|                                             | Study sample<br>in Norway<br>n=1,228<br>(%) | General birthing<br>population in<br>Norway<br>LB=60,220 <sup>2</sup><br>(%) | Study sample<br>in Sweden<br>n=887<br>(%) | General birthing<br>population in<br>Sweden<br>LB=111,770 <sup>2</sup><br>(%) | Study sample<br>in Finland<br>n=574<br>(%) | General birthing<br>population in<br>Finland<br>LB=59,961 <sup>2</sup><br>(%) |
|---------------------------------------------|---------------------------------------------|------------------------------------------------------------------------------|-------------------------------------------|-------------------------------------------------------------------------------|--------------------------------------------|-------------------------------------------------------------------------------|
| <b>Mean Age ± sd</b>                        | 29.0 ± 4.6                                  | 29.8 ± 5.3 <sup>20</sup>                                                     | 29.8 ± 5.3                                | 30.3 <sup>21</sup>                                                            | 29.0±5.1                                   | 30.1 <sup>22</sup>                                                            |
| <b>Marital status</b>                       |                                             |                                                                              |                                           |                                                                               |                                            |                                                                               |
| In marriage                                 | 39.1                                        | 46.0 <sup>20</sup>                                                           | 40.7                                      | 45.8 <sup>2</sup>                                                             | 59.4                                       | 57.8 <sup>22</sup>                                                            |
| Outside marriage                            | 60.9                                        | 53.4 <sup>20</sup>                                                           | 59.3                                      | 54.2 <sup>2</sup>                                                             | 40.6                                       | 42.0 <sup>22</sup>                                                            |
| Unknown                                     | -                                           | 0.6 <sup>20</sup>                                                            |                                           |                                                                               | -                                          | 0.2 <sup>22</sup>                                                             |
| <b>Parity</b>                               |                                             |                                                                              |                                           |                                                                               |                                            |                                                                               |
| No previous children                        | 41.4                                        | 42.4 <sup>20</sup>                                                           | 63.1                                      | 44.9 <sup>21</sup>                                                            | 35.5                                       | 42.2 <sup>22</sup>                                                            |
| <b>Educational level</b>                    |                                             |                                                                              |                                           |                                                                               |                                            |                                                                               |
| Less than high school                       | 4.5                                         | 14.7 <sup>6</sup>                                                            | 5.2                                       | 11.1 <sup>6</sup>                                                             | 8.2                                        | 7.1 <sup>6</sup>                                                              |
| High-school                                 | 28.0                                        | 31.4 <sup>6</sup>                                                            | 30.0                                      | 38.2 <sup>6</sup>                                                             | 36.4                                       | 44.5 <sup>6</sup>                                                             |
| More than high school                       | 46.9                                        | 53.9 <sup>6</sup>                                                            | 60.6                                      | 50.6 <sup>6</sup>                                                             | 52.6                                       | 48.4 <sup>6</sup>                                                             |
| Other                                       | 20.7                                        | -                                                                            | 4.2                                       | -                                                                             | 2.8                                        | -                                                                             |
| <b>Women smoking before pregnancy</b>       | 33.5                                        | 36.5 <sup>7</sup>                                                            | 25.0                                      | 27.2 <sup>7</sup>                                                             | 36.7                                       | 19.7 <sup>7</sup>                                                             |
| <b>Women smoking during pregnancy</b>       | 6.8                                         | 7.0 <sup>20</sup>                                                            | 5.4                                       | 6.5 <sup>21</sup>                                                             | 11.7                                       | 15.2 <sup>22</sup>                                                            |
| <b>Use of alcohol during pregnancy</b>      | 4.1                                         | 7.4 <sup>23</sup>                                                            | 7.2                                       | 5.9 <sup>24</sup>                                                             | 13.9                                       | -                                                                             |
| <b>No. of respondents/No. live births *</b> | 12.2%                                       |                                                                              | 4.8%                                      |                                                                               | 5.7%                                       |                                                                               |

Abbreviations: LB: Number of live births per year.

\*The ratio "No. of respondents/No. live births" is calculated as the proportion (%) of pregnancies included in the study among live births in the country in two months (period of data collection).

## Appendix 2d: Socio-demographic characteristics in Northern European countries (Iceland)

|                                            | Study sample in<br>Iceland<br>n=70 | General birthing<br>population in Iceland<br>LB=4,492 <sup>2</sup> |
|--------------------------------------------|------------------------------------|--------------------------------------------------------------------|
|                                            | (%)                                | (%)                                                                |
| <b>Age range (years)</b>                   |                                    |                                                                    |
| 15-20                                      | 11.3                               | 5.1 <sup>25</sup>                                                  |
| 21-25                                      | 16.9                               | 19.3 <sup>25</sup>                                                 |
| 26-30                                      | 42.3                               | 34.2 <sup>25</sup>                                                 |
| 31-35                                      | 15.5                               | 27.3 <sup>25</sup>                                                 |
| 36-40                                      | 12.7                               | 11.7 <sup>25</sup>                                                 |
| ≥41                                        | 1.4                                | 2.4 <sup>25</sup>                                                  |
| <b>Marital status</b>                      |                                    |                                                                    |
| In marriage                                | 31.0                               | 35.0 <sup>25</sup>                                                 |
| Outside marriage                           | 69.0                               | 65.0 <sup>25</sup>                                                 |
| <b>Parity</b>                              |                                    |                                                                    |
| No previous children                       | 47.9                               | 38.1 <sup>25</sup>                                                 |
| <b>Educational level</b>                   |                                    |                                                                    |
| Less than high school                      | 25.4                               | 21.4 <sup>6</sup>                                                  |
| High-school                                | 18.3                               | 30.5 <sup>6</sup>                                                  |
| More than high school                      | 43.7                               | 48.1 <sup>6</sup>                                                  |
| Other                                      | 12.7                               | -                                                                  |
| <b>Women smoking before pregnancy</b>      | 40.8                               | 35.5 <sup>7</sup>                                                  |
| <b>No. of respondents/No. live births*</b> | 9.3%                               |                                                                    |

Abbreviations: LB: Number of live births per year.

\*The ratio "No. of respondents/No. live births" is calculated as the proportion (%) of pregnancies included in the study among live births in the country in two months (period of data collection).

1  
2  
3  
4  
5  
6  
7  
8  
9  
10  
11  
12  
13  
14  
15  
16  
17  
18  
19  
20  
21  
22  
23  
24  
25  
26  
27  
28  
29  
30  
31  
32  
33  
34  
35  
36  
37  
38  
39  
40  
41  
42  
43  
44  
45  
46  
47  
48  
49

**Appendix 2e: Socio-demographic characteristics in Eastern European countries (Russia and Poland)**

|                                                       | Study sample in<br>Russia<br>n=1,008 | General birthing<br>population in Russia<br>LB=1,796,629 <sup>2</sup> | Study sample in<br>Poland<br>n=679 | General birthing<br>population in Poland<br>LB=388,416 <sup>2</sup> |
|-------------------------------------------------------|--------------------------------------|-----------------------------------------------------------------------|------------------------------------|---------------------------------------------------------------------|
|                                                       | (%)                                  | (%)                                                                   | (%)                                | (%)                                                                 |
| <b>Mean Age ± sd</b>                                  | 27.7 ± 4.8                           | 27.4 <sup>26</sup>                                                    | 27.1 ± 4.1                         | 28.6 <sup>27*</sup>                                                 |
| <b>Marital status</b>                                 |                                      |                                                                       |                                    |                                                                     |
| In marriage                                           | 85.3                                 | 73.9 <sup>26</sup>                                                    | 85.0                               | 79.4 <sup>27</sup>                                                  |
| Outside marriage                                      | 14.7                                 | 26.1 <sup>26</sup>                                                    | 15.0                               | 20.6 <sup>27</sup>                                                  |
| <b>Parity</b>                                         |                                      |                                                                       |                                    |                                                                     |
| No previous children                                  | 57.9                                 | -                                                                     | 40.6                               | 50.1 <sup>27</sup>                                                  |
| <b>Educational level</b>                              |                                      |                                                                       |                                    |                                                                     |
| Less than high school                                 | 1.6                                  | -                                                                     | 1.9                                | 8.7 <sup>27</sup>                                                   |
| High-school                                           | 9.3                                  | -                                                                     | 31.1                               | 49.6 <sup>27</sup>                                                  |
| More than high school                                 | 75.1                                 | -                                                                     | 65.1                               | 41.6 <sup>27</sup>                                                  |
| Other                                                 | 14.0                                 | -                                                                     | 1.9                                | -                                                                   |
| <b>Women smoking before pregnancy</b>                 | 46.1                                 | 30.8 <sup>28</sup>                                                    | 49.2                               | 25.0 <sup>29</sup>                                                  |
| <b>Women smoking during pregnancy</b>                 | 9.6                                  | 4.3-6.5 <sup>30,31</sup>                                              | 12.8                               | 22-30 <sup>29</sup>                                                 |
| <b>Use of alcohol during pregnancy</b>                | 26.0                                 | 60.0 <sup>32</sup>                                                    | 9.6                                | 15.3 <sup>33</sup>                                                  |
| <b>No. of respondents/No. live births<sup>†</sup></b> | 0.3%                                 |                                                                       | 1.0%                               |                                                                     |

Abbreviations: LB: Number of live births per year.

\*Median age of women at birth, not mean age.

†The ratio “No. of respondents/No. live births” is calculated as the proportion (%) of pregnancies included in the study among live births in the country in two months (period of data collection).



Appendix 2f: Socio-demographic characteristics in Eastern European countries (Croatia, Serbia and Slovenia)

|                                                        | Study sample<br>in Croatia | General birthing<br>population in<br>Croatia | Study sample<br>in Serbia | General birthing<br>population in<br>Serbia | Study sample<br>in Slovenia | General birthing<br>population in<br>Slovenia |
|--------------------------------------------------------|----------------------------|----------------------------------------------|---------------------------|---------------------------------------------|-----------------------------|-----------------------------------------------|
|                                                        | n=286                      | LB=41,197 <sup>2</sup>                       | n=220                     | LB=65,598 <sup>2</sup>                      | n=149                       | LB=21,947 <sup>2</sup>                        |
|                                                        | n (%)                      | (%)                                          | n (%)                     | (%)                                         | n (%)                       | (%)                                           |
| <b>Mean Age ± sd</b>                                   | 29.1 ± 4.5*                | 27.7 <sup>34</sup>                           | 29.2 ± 3.9*               | 28.7 <sup>35</sup>                          | 31.7 ± 4.5                  | 30.4 <sup>36</sup>                            |
| <b>Marital status</b>                                  |                            |                                              |                           |                                             |                             |                                               |
| In marriage                                            | 83.9                       | 86.7 <sup>34</sup>                           | 90.1                      | 76.1 <sup>35</sup>                          | 47.0                        | 43.2 <sup>36</sup>                            |
| Outside marriage                                       | 16.1                       | 13.3 <sup>34</sup>                           | 9.9                       | 23.9 <sup>35</sup>                          | 53.0                        | 56.8 <sup>36</sup>                            |
| Unknown                                                | -                          | -                                            | -                         | -                                           | -                           | -                                             |
| <b>Parity</b>                                          |                            |                                              |                           |                                             |                             |                                               |
| No previous children                                   | 50.7                       | 46.9 <sup>34</sup>                           | 46.8                      | 51.1 <sup>35</sup>                          | 45.6                        | 48.5 <sup>36</sup>                            |
| <b>Educational level</b>                               |                            |                                              |                           |                                             |                             |                                               |
| Less than high school                                  | 1.0                        | 3.1 <sup>34</sup>                            | 0.9                       | 15.9 <sup>37</sup>                          | 2.0                         | 8.5 <sup>36</sup>                             |
| High-school                                            | 36.7                       | 52.5 <sup>34</sup>                           | 33.6                      | 54.9 <sup>37</sup>                          | 24.8                        | 48.5 <sup>36</sup>                            |
| More than high school                                  | 61.2                       | 44.4 <sup>34</sup>                           | 61.8                      | 29.2 <sup>37</sup>                          | 69.1                        | 43.0 <sup>36</sup>                            |
| Other                                                  | 1.0                        | -                                            | 3.6                       | -                                           | 4.0                         | -                                             |
| <b>Women smoking before pregnancy</b>                  | 50.0                       | 34.4 <sup>34</sup>                           | 49.1                      | 29.9 <sup>38</sup>                          | 32.9                        | 34.4 <sup>7</sup>                             |
| <b>Women smoking during pregnancy</b>                  | 18.8                       | 23.1 <sup>39</sup>                           | 18.2                      | 18.4 <sup>40</sup>                          | 6.7                         | 9.6-11.2 <sup>41</sup>                        |
| <b>Use of alcohol during pregnancy</b>                 | 12.6                       | 15.5 <sup>42</sup>                           | 15.0                      | -                                           | 32.2                        | -                                             |
| <b>No. of respondents/No. live births</b> <sup>†</sup> | 4.2%                       |                                              | 2.0%                      |                                             | 4.1%                        |                                               |

Abbreviations: LB: Number of live births per year.

\*Mean age for first child (as it is available from the Statistics Bureau reports in Croatia and Serbia).

<sup>†</sup>The ratio "No. of respondents/No. live births" is calculated as the proportion (%) of pregnancies included in the study among live births in the country in two months (period of data collection).

1  
2  
3  
4  
5  
6  
7  
8  
9  
10  
11  
12  
13  
14  
15  
16  
17  
18  
19  
20  
21  
22  
23  
24  
25  
26  
27  
28  
29  
30  
31  
32  
33  
34  
35  
36  
37  
38  
39  
40  
41  
42  
43  
44  
45  
46  
47  
48  
49

**Appendix 2g:** Socio-demographic characteristics in North American countries (USA, Canada) and Australia.

|                                        | Study sample in<br>The USA<br>n=297 | General birthing<br>population in<br>USA <sup>43</sup><br>LB=3,999,386 | Study sample<br>in Canada<br>n=236 | General birthing<br>population in<br>Canada <sup>44</sup><br>LB=377,636 | Study sample<br>in Australia<br>n=217 | General birthing<br>population in<br>Australia <sup>45</sup><br>LB=301,617 |
|----------------------------------------|-------------------------------------|------------------------------------------------------------------------|------------------------------------|-------------------------------------------------------------------------|---------------------------------------|----------------------------------------------------------------------------|
|                                        | n (%)                               | (%)                                                                    | n (%)                              | (%)                                                                     | n (%)                                 | (%)                                                                        |
| <b>Age range (years)</b>               |                                     |                                                                        |                                    |                                                                         |                                       |                                                                            |
| 15-19                                  | 4.7                                 | 9.3 <sup>43</sup>                                                      | 2.1                                | 3.9 <sup>44</sup>                                                       | 2.3                                   | 3.8 <sup>45</sup>                                                          |
| 20-24                                  | 18.2                                | 23.8 <sup>43</sup>                                                     | 25.0                               | 14.6 <sup>44</sup>                                                      | 8.8                                   | 13.8 <sup>45</sup>                                                         |
| 25-29                                  | 28.3                                | 28.3 <sup>43</sup>                                                     | 30.1                               | 30.2 <sup>44</sup>                                                      | 31.8                                  | 27.9 <sup>45</sup>                                                         |
| 30-34                                  | 29.3                                | 24.1 <sup>43</sup>                                                     | 30.5                               | 32.2 <sup>44</sup>                                                      | 27.6                                  | 31.7 <sup>45</sup>                                                         |
| 35-39                                  | 15.2                                | 11.6 <sup>43</sup>                                                     | 11.0                               | 15.6 <sup>44</sup>                                                      | 22.1                                  | 18.4 <sup>45</sup>                                                         |
| 40-44                                  | 4.0                                 | 2.7 <sup>43</sup>                                                      | 1.3                                | 3.1 <sup>44</sup>                                                       | 6.9                                   | 4.0 <sup>45</sup>                                                          |
| ≥45                                    | 0.3                                 | 0.2 <sup>43</sup>                                                      | -                                  | 0.2 <sup>44</sup>                                                       | 0.5                                   | 0.2 <sup>45</sup>                                                          |
| <b>Mean Age ± sd</b>                   | 29.3 ± 6.1                          | -                                                                      | 28.3 ± 5.2                         | 29.6 <sup>44</sup>                                                      | 31.1 ± 5.7                            | 30.7 <sup>45</sup>                                                         |
| <b>Marital status</b>                  |                                     |                                                                        |                                    |                                                                         |                                       |                                                                            |
| In marriage                            | 67.0                                | 59.2 <sup>46</sup>                                                     | 42.4                               | 60.4 <sup>44</sup>                                                      | 70.5                                  | 65.8 <sup>45</sup>                                                         |
| Outside marriage                       | 33.0                                | 39.9 <sup>46</sup>                                                     | 57.6                               | 28.8 <sup>44</sup>                                                      | 29.5                                  | 34.2 <sup>45</sup>                                                         |
| Unknown                                | -                                   | 0.9 <sup>46</sup>                                                      | -                                  | 10.8 <sup>44</sup>                                                      | -                                     | -                                                                          |
| <b>Parity</b>                          |                                     |                                                                        |                                    |                                                                         |                                       |                                                                            |
| No previous children                   | 41.1                                | 40.1 <sup>43</sup>                                                     | 48.3                               | 43.3 <sup>44</sup>                                                      | 47.9                                  | 43.8 <sup>45</sup>                                                         |
| <b>Educational level</b>               |                                     |                                                                        |                                    |                                                                         |                                       |                                                                            |
| Less than high school                  | 2.7                                 | 17.4 <sup>47</sup>                                                     | 1.3                                | 8.4 <sup>48</sup>                                                       | 0.5                                   | 20.6 <sup>49</sup>                                                         |
| High-school                            | 25.3                                | 24.4 <sup>47</sup>                                                     | 24.6                               | -                                                                       | 29.0                                  | -                                                                          |
| More than high school                  | 62.0                                | 58.2 <sup>47</sup>                                                     | 67.8                               | 69.6 <sup>48</sup>                                                      | 63.1                                  | 56.0 <sup>50</sup>                                                         |
| Other                                  | 10.1                                | -                                                                      | 6.4                                | -                                                                       | 7.4                                   | -                                                                          |
| <b>Women smoking before pregnancy</b>  | 28.3                                | 21.5 <sup>51</sup>                                                     | 29.2                               | 22.0 <sup>52</sup>                                                      | 29.1                                  | 29.9 <sup>53</sup>                                                         |
| <b>Women smoking during pregnancy</b>  | 8.1                                 | 10.2 <sup>54</sup>                                                     | 16.1                               | 13.4 <sup>48</sup>                                                      | 14.3                                  | 14.5 <sup>55</sup>                                                         |
| <b>Use of alcohol during pregnancy</b> | 17.5                                | 15.5 <sup>51</sup>                                                     | 16.1                               | 10.5 <sup>48</sup>                                                      | 27.2                                  | 29.0 <sup>56</sup>                                                         |

|                                            | Study sample in<br>The USA | General birthing<br>population in<br>USA <sup>43</sup> | Study sample<br>in Canada | General birthing<br>population in<br>Canada <sup>44</sup> | Study sample<br>in Australia | General birthing<br>population in<br>Australia <sup>45</sup> |
|--------------------------------------------|----------------------------|--------------------------------------------------------|---------------------------|-----------------------------------------------------------|------------------------------|--------------------------------------------------------------|
|                                            | n=297                      | LB=3,999,386                                           | n=236                     | LB=377,636                                                | n=217                        | LB=301,617                                                   |
|                                            | n (%)                      | (%)                                                    | n (%)                     | (%)                                                       | n (%)                        | (%)                                                          |
| <i>No. of respondents/No. live births*</i> | 0.04%                      |                                                        | 0.4%                      |                                                           | 0.4%                         |                                                              |

Abbreviations: LB: Number of live births per year.

\*The ratio “No. of respondents/No. live births” is calculated as the proportion (%) of pregnancies included in the study among live births in the country in two months (period of data collection).

#### Sources of socio-demographic characteristics of the general birthing population:

1. UK National Statistics. Characteristics of Birth 1 and 2/of mother 1 and 2, England and Wales. 2010; <http://www.statistics.gov.uk/hub/population/births-and-fertility/maternal/index.html>. Accessed November 12th, 2012.
2. Eurostat. Live births by mother's age at last birthday and legal marital status. [http://appsso.eurostat.ec.europa.eu/nui/show.do?dataset=demo\\_fagec&lang=en](http://appsso.eurostat.ec.europa.eu/nui/show.do?dataset=demo_fagec&lang=en). Accessed November 6th, 2012.
3. Istat - Istituto nazionale di statistica. Demography in figures. 2011; [http://demo.istat.it/index\\_e.html](http://demo.istat.it/index_e.html).
4. Swiss Statistics. Components of population change – Data, indicators. <http://www.bfs.admin.ch/bfs/portal/en/index/themen/01/06/blank/key/01.html>.
5. Donati S, Baglio G, Spinelli A, Grandolfo ME. Drug use in pregnancy among Italian women. *Eur. J. Clin. Pharmacol.* Jul 2000;56(4):323-328.
6. Eurostat. Persons with a given education attainment level by sex and age groups (%). [http://epp.eurostat.ec.europa.eu/portal/page/portal/product\\_details/dataset?p\\_product\\_code=EDAT\\_LFS\\_9903](http://epp.eurostat.ec.europa.eu/portal/page/portal/product_details/dataset?p_product_code=EDAT_LFS_9903). Accessed November 6th, 2012.
7. Eurostat. Smokers by sex. [http://epp.eurostat.ec.europa.eu/portal/page/portal/product\\_details/dataset?p\\_product\\_code=TPS00169](http://epp.eurostat.ec.europa.eu/portal/page/portal/product_details/dataset?p_product_code=TPS00169). Accessed November 6th, 2012.
8. The Health and Social Care Information Centre. Statistics on women's smoking status at time of delivery: England, Quarter 1, 2012/13. 2012; <http://www.ic.nhs.uk/pubs/wsstd1213q1>. Accessed November 12th, 2012.
9. De Santis M, De Luca C, Mappa I, Quattrocchi T, Angelo L, Cesari E. Smoke, alcohol consumption and illicit drug use in an Italian population of pregnant women. *Eur. J. Obstet. Gynecol. Reprod. Biol.* Nov 2011;159(1):106-110.
10. Lemola S, Grob A. Drinking and smoking in pregnancy: what questions do Swiss physicians ask? *Swiss Med. Wkly.* Jan 27 2007;137(3-4):66-69.
11. Sayal K, Heron J, Golding J, et al. Binge pattern of alcohol consumption during pregnancy and childhood mental health outcomes: longitudinal population-based study. *Pediatrics.* Feb 2009;123(2):e289-296.
12. National Institute of Statistics and Economic Studies INSEE. Population. <http://www.insee.fr/en/themes/theme.asp?theme=2>. Accessed November 7th, 2012.
13. Statline, Centraal Bureaus voor de Statistiek. Population. 2012. <http://www.cbs.nl/en-GB/menu/themas/bevolking/nieuws/default.htm>. Accessed November 10th, 2012.

14. Statistics Austria. Births. Long-term and current final annual results. 2011; [http://www.statistik.at/web\\_en/statistics/population/births/index.html](http://www.statistik.at/web_en/statistics/population/births/index.html). Accessed November 6th, 2012.
15. STATcube - Statistical Database of Statistics Austria. <http://statcube.at/superweb/login.do?guest=guest>. Accessed November 6th, 2012.
16. Menai M, Heude B, Slama R, et al. Association between maternal blood cadmium during pregnancy and birth weight and the risk of fetal growth restriction: The EDEN mother-child cohort study. *Reprod. Toxicol.* 12// 2012;34(4):622-627.
17. Jahrbuch der Gesundheitsstatistik. Wien 2011.
18. Leermakers ET, Taal HR, Bakker R, Steegers EA, Hofman A, Jaddoe VW. A common genetic variant at 15q25 modifies the associations of maternal smoking during pregnancy with fetal growth: the generation R study. *PLoS One.* 2012;7(4):e34584.
19. de Chazeron I, Llorca PM, Ughetto S, et al. Is pregnancy the time to change alcohol consumption habits in France? *Alcohol. Clin. Exp. Res.* May 2008;32(5):868-873.
20. Norwegian Institute of Public Health. Medisinsk fødselsregisters statistikkbank - statistikk om alle fødsler i Norge. 2011; <http://mfr-nesstar.uib.no/mfr/>. Accessed November 6th, 2012.
21. Nordic Perinatal Statistics 2010. National Institute for Health and Welfare.
22. The National Institute for Health and Welfare, Helsinki Finland. Liitetaulukot - Bilagetabeller - Appendix Tables. 2010.
23. Ystrom E, Vollrath ME, Nordeng H. Effects of personality on use of medications, alcohol, and cigarettes during pregnancy. *Eur. J. Clin. Pharmacol.* May 2012;68(5):845-851.
24. Nilsen P, Holmqvist M, Hultgren E, Bendtsen P, Cedergren M. Alcohol use before and during pregnancy and factors influencing change among Swedish women. *Acta Obstet. Gynecol. Scand.* 2008;87(7):768-774.
25. Births and Deaths. Statistics Iceland. <http://www.statice.is/Statistics/Population/Births-and-deaths>. Accessed November 6th, 2012.
26. The Demographic Yearbook of Russia - statistical handbook. Moscow: Federal State Statistics Service (Rosstat);2010.
27. Demographic Yearbook of Poland. Warsaw: Central Statistical Office of Poland;2011.
28. Current tobacco use and secondhand smoke exposure among women of reproductive age - 14 countries, 2008-2010. *MMWR Morb. Mortal. Wkly. Rep.* Nov 2 2012;61:877-882.
29. Przewoźniak K, Zatoński W. Ekspertyza „zachowania zdrowotne kobiet w ciąży”. Warszawa: Zakład Epidemiologii i Prewencji Nowotworów, Centrum Onkologii – Instytut w Warszawie. Posiedzenie Plenarne Rady Naukowej przy Ministrze Zdrowia, Ministerstwo Zdrowia; 24-03-2010 2010.
30. Kelmanson IA, Erman LV, Litvina SV. Maternal smoking during pregnancy and behavioural characteristics in 2 - 4-month-old infants. *Klin. Padiatr.* Nov-Dec 2002;214(6):359-364.
31. Hugg TT, Jaakkola MS, Ruotsalainen RO, Pushkarev VJ, Jaakkola JJ. Parental smoking behaviour and effects of tobacco smoke on children's health in Finland and Russia. *Eur. J. Public Health.* Feb 2008;18(1):55-62.
32. Kristjanson AF, Wilsnack SC, Zvartau E, Tsoy M, Novikov B. Alcohol use in pregnant and nonpregnant Russian women. *Alcohol. Clin. Exp. Res.* Feb 2007;31(2):299-307.
33. Wojtyła A, Kapka-Skrzypczak L, Diatczyk J, Fronczak A, Paprzycki P. Alcohol-related Developmental Origin of Adult Health - population studies in Poland among mothers and newborns (2010-2012). *Ann. Agric. Environ. Med.* Sep 20 2012;19(3):365-377.

34. Statistical Yearbook of the Republic of Croatia. Zagreb: Croatian Bureau of Statistics; 2011 December 2011.
35. Statistical Yearbook of the Republic of Serbia. Demographic Yearbook in Republic of Serbia. Belgrade: Statistical Office of the Republic of Serbia;2011.
36. Statistical Office of the Republic of Slovenia. SI-STAT Data Portal. Population. <http://pxweb.stat.si/pxweb/Database/Demographics/Demographics.asp>. Accessed November 7th, 2012.
37. Krstev S, Marinkovic J, Simic S, Kocev N, Bondy SJ. Prevalence and predictors of smoking and quitting during pregnancy in Serbia: results of a nationally representative survey. *Int J Public Health*. Sep 16 2011.
38. Statistical Office of the Republic of Serbia. Women and Men in the Republic of Serbia, Belgrade 2011. 2011.
39. Strinic T, Bukovic D, Sumilin L, Radic A, Hauptman D, Klobucar A. Socio-demographic characteristics and lifestyle habits of pregnant women smokers. *Coll. Antropol.* Dec 2005;29(2):611-614.
40. Odalovic M, Vezmar Kovacevic S, Ilic K, Sabo A, Tasic L. Drug use before and during pregnancy in Serbia. *Int. J. Clin. Pharm.* Oct 2012;34(5):719-727.
41. Antolič B, Geršak K, Verdenik I, Novak-Antolič Ž. Adverse effects of thyroid dysfunction on pregnancy and pregnancy outcome: Epidemiologic study in Slovenia. *Journal of Maternal-Fetal and Neonatal Medicine*. 2006;19(10):651-654.
42. Petkovic G, Barisic I. FAS prevalence in a sample of urban schoolchildren in Croatia. *Reprod. Toxicol.* Apr 2010;29(2):237-241.
43. Hamilton B, Martin J, Ventura S. National Vital Statistics Reports. Births: Preliminary Data for 2010. U.S. Department of health and human services. Centers for Disease Control and Prevention. National Center for Health Statistics. National Vital Statistics System;2011.
44. Statistics Canada. Births. 2010; <http://www.statcan.gc.ca/daily-quotidien/1111220/dq1111220g-eng.htm>. Accessed 12 November 2012.
45. Australian Bureau of Statistics. Births, Australia. 2011; <http://www.abs.gov.au/AUSSTATS/abs@.nsf/mf/3301.0>. Accessed November 13th, 2012.
46. OECD. Panorama de la société 2011. OECD Publishing.
47. The 2012 Statistical Abstract.The National Data Book. Women With Births in the Past 12 Months by Citizenship Status, Educational Attainment, and Poverty Status, by State. 2009; [http://www.census.gov/compendia/statab/cats/births\\_deaths\\_marriages\\_divorces/births.html](http://www.census.gov/compendia/statab/cats/births_deaths_marriages_divorces/births.html). Accessed November 12th, 2012.
48. Canadian Perinatal Health Report, 2008 Edition. Ottawa: Public Health Agency of Canada;2008.
49. Sawicki E, Stewart K, Wong S, Leung L, Paul E, George J. Medication use for chronic health conditions by pregnant women attending an Australian maternity hospital. *Aust. N. Z. J. Obstet. Gynaecol.* 2011;51(4):333-338.
50. Australian Bureau of Statistics. Australian Social Trends, Sep 2012. 2012; <http://www.abs.gov.au/AUSSTATS/abs@.nsf/Lookup/4102.0Main+Features20Sep+2012>. Accessed November 13th, 2012.
51. Substance Abuse and Mental Health Services Administration, Results from the 2010 National Survey on Drug Use and Health: Summary of National Findings. NSDUH Series H-41, HHS Publication No. (SMA) 11-4658. Rockville, MD: Substance Abuse and Mental Health Services Administration;2011.
52. Public Health Agency of Canada. What Mothers Say: The Canadian Maternity Experiences Survey. Ottawa2009.
53. Hotham E, Ali R, White J, Robinson J. Pregnancy-related changes in tobacco, alcohol and cannabis use reported by antenatal patients at two public hospitals in South Australia. *Aust. N. Z. J. Obstet. Gynaecol.* Jun 2008;48(3):248-254.
54. Health, United States, 2011: With Special Feature on Socioeconomic Status and Health. Hyattsville, MD: National Center for Health Statistics;2012.
55. Australia's mothers and babies 2009. Perinatal statistics series no. 25. Cat. no. PER 52. Canberra: AIHW;2011.

1  
2  
3  
4  
5  
6  
7  
8  
9  
10  
11  
12  
13  
14  
15  
16  
17  
18  
19  
20  
21  
22  
23  
24  
25  
26  
27  
28  
29  
30  
31  
32  
33  
34  
35  
36  
37  
38  
39  
40  
41  
42  
43  
44  
45  
46  
47  
48  
49

56. Maloney E, Hutchinson D, Burns L, Mattick RP, Black E. Prevalence and predictors of alcohol use in pregnancy and breastfeeding among Australian women. Birth. Mar 2011;38(1):3-9.

For peer review only

**Appendix 3:** Overall medication use on 1<sup>st</sup> and 2<sup>nd</sup> ATC level according to timing of use in pregnancy (n=9,459)\*

| Anatomical Therapeutic Chemical (ATC) classification index<br>1 <sup>st</sup> and 2 <sup>nd</sup> levels |                                                                  | Anytime during<br>pregnancy<br>n (%) | 1 <sup>st</sup> trimester<br>n (%) | 2 <sup>nd</sup> trimester<br>n (%) | 3 <sup>rd</sup> trimester<br>n (%) |
|----------------------------------------------------------------------------------------------------------|------------------------------------------------------------------|--------------------------------------|------------------------------------|------------------------------------|------------------------------------|
| <b>A</b>                                                                                                 | <b>Alimentary tract and metabolism</b>                           | <b>4,275 (45.2)</b>                  | <b>2,786 (29.5)</b>                | <b>3,390 (35.8)</b>                | <b>3,160 (33.4)</b>                |
| A01                                                                                                      | Stomatological preparations                                      | 62 (0.7)                             | 42 (0.4)                           | 52 (0.5)                           | 46 (0.5)                           |
| A02                                                                                                      | <i>Drugs for acid related disorders</i>                          | 3,242 (34.3)                         | 2,034 (21.5)                       | 2,634 (27.8)                       | 2,615 (27.6)                       |
| A03                                                                                                      | Drugs for functional gastrointestinal disorders                  | 650 (6.9)                            | 543 (5.7)                          | 512 (5.4)                          | 381 (4.0)                          |
| A04                                                                                                      | Antiemetics and antinauseants                                    | 136 (1.4)                            | 124 (1.3)                          | 114 (1.2)                          | 81 (0.9)                           |
| A05                                                                                                      | Bile and liver therapy                                           | 24 (0.3)                             | 15 (0.2)                           | 17 (0.2)                           | 16 (0.2)                           |
| A06                                                                                                      | <i>Laxatives</i>                                                 | 978 (10.3)                           | 696 (7.4)                          | 835 (8.8)                          | 735 (7.8)                          |
| A07                                                                                                      | Antidiarrheals, intestinal antiinflammatory/antiinfective agents | 89 (0.9)                             | 61 (0.6)                           | 69 (0.7)                           | 57 (0.6)                           |
| A09                                                                                                      | Digestives, incl. enzymes                                        | 9 (0.1)                              | 7 (0.1)                            | 8 (0.1)                            | 3 (0.0)                            |
| A10                                                                                                      | Drugs used in diabetes                                           | 85 (0.9)                             | 57 (0.6)                           | 58 (0.6)                           | 45 (0.5)                           |
| -                                                                                                        | Unspecified medications for nausea                               | 6 (0.1)                              | 5 (0.1)                            | 4 (0.0)                            | 3 (0.0)                            |
| <b>B</b>                                                                                                 | <b>Blood and blood forming organs</b>                            | <b>148 (1.6)</b>                     | <b>89 (0.9)</b>                    | <b>102 (1.1)</b>                   | <b>79 (0.8)</b>                    |
| B01                                                                                                      | <i>Antithrombotic agents</i>                                     | 135 (1.4)                            | 78 (0.8)                           | 95 (1.0)                           | 72 (0.8)                           |
| B02                                                                                                      | Antihemorrhagics                                                 | 5 (0.1)                              | 4 (0.0)                            | 2 (0.0)                            | 3 (0.0)                            |
| B05                                                                                                      | Blood substitutes and perfusion solutions                        | 7 (0.1)                              | 5 (0.1)                            | 5 (0.1)                            | 2 (0.0)                            |
| B06                                                                                                      | Other hematological agents                                       | 3 (0.0)                              | 2 (0.0)                            | 2 (0.0)                            | 3 (0.0)                            |
| <b>C</b>                                                                                                 | <b>Cardiovascular system</b>                                     | <b>202 (2.1)</b>                     | <b>132 (1.4)</b>                   | <b>161 (1.7)</b>                   | <b>133 (1.4)</b>                   |
| C01                                                                                                      | Cardiac therapy                                                  | 7 (0.1)                              | 4 (0.0)                            | 5 (0.1)                            | 4 (0.1)                            |
| C02                                                                                                      | <i>Antihypertensives</i>                                         | 56 (0.6)                             | 34 (0.4)                           | 42 (0.4)                           | 31 (0.3)                           |
| C03                                                                                                      | Diuretics                                                        | 6 (0.1)                              | 5 (0.1)                            | 3 (0.0)                            | 2 (0.0)                            |
| C04                                                                                                      | Peripheral vasodilators                                          | 3 (0.0)                              | 3 (0.0)                            | 3 (0.0)                            | 3 (0.0)                            |
| C05                                                                                                      | Vasoprotectives                                                  | 44 (0.5)                             | 24 (0.3)                           | 35 (0.4)                           | 31 (0.3)                           |
| C07                                                                                                      | <i>Beta blocking agents</i>                                      | 74 (0.8)                             | 51 (0.5)                           | 59 (0.6)                           | 51 (0.5)                           |
| C08                                                                                                      | Calcium channel blockers                                         | 21 (0.2)                             | 16 (0.2)                           | 18 (0.2)                           | 13 (0.1)                           |
| C09                                                                                                      | Agents acting on the renin-angiotensin system                    | 4 (0.0)                              | 2 (0.0)                            | 2 (0.0)                            | 2 (0.0)                            |
| C10                                                                                                      | Lipid modifying agents                                           | 5 (0.1)                              | 3 (0.0)                            | 4 (0.0)                            | 4 (0.0)                            |
| -                                                                                                        | Unspecified medications for hypertension                         | 4 (0.0)                              | 3 (0.0)                            | 3 (0.0)                            | 2 (0.0)                            |

| Anatomical Therapeutic Chemical (ATC) classification index<br>1 <sup>st</sup> and 2 <sup>nd</sup> levels |                                                                        | Anytime during<br>pregnancy<br>n (%) | 1 <sup>st</sup> trimester<br>n (%) | 2 <sup>nd</sup> trimester<br>n (%) | 3 <sup>rd</sup> trimester<br>n (%) |
|----------------------------------------------------------------------------------------------------------|------------------------------------------------------------------------|--------------------------------------|------------------------------------|------------------------------------|------------------------------------|
| <b>D</b>                                                                                                 | <b>Dermatologicals</b>                                                 | <b>162 (1.7)</b>                     | <b>116 (1.2)</b>                   | <b>127 (1.3)</b>                   | <b>103 (1.1)</b>                   |
| <b>D01</b>                                                                                               | <i>Antifungals for dermatological use</i>                              | 38 (0.4)                             | 28 (0.3)                           | 33 (0.3)                           | 27 (0.3)                           |
| <b>D02</b>                                                                                               | Emollients and protectives                                             | 14 (0.1)                             | 11 (0.1)                           | 12 (0.1)                           | 10 (0.1)                           |
| <b>D03</b>                                                                                               | Preparations for treatment of wounds and ulcers                        | 4 (0.0)                              | 3 (0.0)                            | 3 (0.0)                            | 3 (0.0)                            |
| <b>D04</b>                                                                                               | Antipruritics, incl. antihistamines, anesthetics, etc.                 | 6 (0.1)                              | 3 (0.0)                            | 5 (0.1)                            | 4 (0.0)                            |
| <b>D05</b>                                                                                               | Antipsoriatics                                                         | 3 (0.0)                              | 1 (0.0)                            | 1 (0.0)                            | 1 (0.0)                            |
| <b>D06</b>                                                                                               | Antibiotics and chemotherapeutics for dermatological use               | 21 (0.2)                             | 15 (0.2)                           | 16 (0.2)                           | 13 (0.1)                           |
| <b>D07</b>                                                                                               | <i>Corticosteroids, dermatological preparations</i>                    | 56 (0.6)                             | 40 (0.4)                           | 39 (0.4)                           | 31 (0.3)                           |
| <b>D08</b>                                                                                               | Antiseptics and disinfectants                                          | 14 (0.1)                             | 9 (0.1)                            | 10 (0.1)                           | 9 (0.1)                            |
| <b>D09</b>                                                                                               | Medicated dressings                                                    | 5 (0.1)                              | 5 (0.1)                            | 5 (0.1)                            | 3 (0.0)                            |
| <b>D10</b>                                                                                               | Anti-acne preparations                                                 | 4 (0.0)                              | 4 (0.0)                            | 4 (0.0)                            | 2 (0.0)                            |
| <b>D11</b>                                                                                               | Other dermatological preparations                                      | 1 (0.0)                              | -                                  | 1 (0.0)                            | 1 (0.0)                            |
| -                                                                                                        | Unspecified medications for skin disorders                             | 5 (0.1)                              | 4 (0.0)                            | 4 (0.0)                            | 3 (0.0)                            |
| <b>G</b>                                                                                                 | <b>Genito urinary system and sex hormones</b>                          | <b>488 (5.2)</b>                     | <b>318 (3.4)</b>                   | <b>394 (4.2)</b>                   | <b>303 (3.2)</b>                   |
| <b>G01</b>                                                                                               | <i>Gynecological antiinfectives and antiseptics</i>                    | 406 (4.3)                            | 255 (2.7)                          | 337 (3.6)                          | 258 (2.7)                          |
| <b>G02</b>                                                                                               | Other gynecologicals                                                   | 13 (0.1)                             | 10 (0.1)                           | 10 (0.1)                           | 8 (0.1)                            |
| <b>G03</b>                                                                                               | Sex hormones and modulators of the genital system                      | 68 (0.7)                             | 55 (0.6)                           | 50 (0.5)                           | 36 (0.4)                           |
| <b>G04</b>                                                                                               | Urologicals                                                            | 12 (0.1)                             | 8 (0.1)                            | 7 (0.1)                            | 8 (0.1)                            |
| <b>H</b>                                                                                                 | <b>Systemic hormonal preparations, excl. sex hormones and insulins</b> | <b>486 (5.1)</b>                     | <b>304 (3.2)</b>                   | <b>346 (3.7)</b>                   | <b>262 (2.8)</b>                   |
| <b>H01</b>                                                                                               | Pituitary and hypothalamic hormones and analogues                      | 4 (0.0)                              | 4 (0.0)                            | 3 (0.0)                            | 4 (0.0)                            |
| <b>H02</b>                                                                                               | Corticosteroids for systemic use                                       | 93 (1.0)                             | 64 (0.7)                           | 78 (0.8)                           | 63 (0.7)                           |
| <b>H03</b>                                                                                               | <i>Thyroid therapy</i>                                                 | 397 (4.2)                            | 242 (2.6)                          | 273 (2.9)                          | 201 (2.1)                          |
| <b>J</b>                                                                                                 | <b>Antiinfectives for systemic use</b>                                 | <b>1,381 (14.6)</b>                  | <b>874 (9.2)</b>                   | <b>1,107 (11.7)</b>                | <b>943 (10.0)</b>                  |
| <b>J01</b>                                                                                               | <i>Antibacterials for systemic use</i>                                 | 1,325 (14.0)                         | 840 (8.9)                          | 1,061 (11.2)                       | 908 (9.6)                          |
| <b>J02</b>                                                                                               | Antimycotics for systemic use                                          | 23 (0.2)                             | 16 (0.2)                           | 21 (0.2)                           | 17 (0.2)                           |
| <b>J05</b>                                                                                               | Antivirals for systemic use                                            | 39 (0.4)                             | 27 (0.3)                           | 30 (0.3)                           | 26 (0.3)                           |
| <b>J06</b>                                                                                               | Immune sera and immunoglobulins                                        | 4 (0.0)                              | 2 (0.0)                            | 3 (0.0)                            | 4 (0.0)                            |
| <b>J07</b>                                                                                               | Vaccines                                                               | 10 (0.1)                             | 5 (0.1)                            | 8 (0.1)                            | 5 (0.1)                            |



| Anatomical Therapeutic Chemical (ATC) classification index<br>1 <sup>st</sup> and 2 <sup>nd</sup> levels |                                                            | Anytime during<br>pregnancy<br>n (%) | 1 <sup>st</sup> trimester<br>n (%) | 2 <sup>nd</sup> trimester<br>n (%) | 3 <sup>rd</sup> trimester<br>n (%) |
|----------------------------------------------------------------------------------------------------------|------------------------------------------------------------|--------------------------------------|------------------------------------|------------------------------------|------------------------------------|
| <b>L</b>                                                                                                 | <b>Antineoplastic and immunomodulating agents</b>          | <b>134 (1.4)</b>                     | <b>83 (0.9)</b>                    | <b>117 (1.2)</b>                   | <b>97 (1.0)</b>                    |
| <b>L01</b>                                                                                               | Antineoplastic agents                                      | 4 (0.0)                              | 3 (0.0)                            | 4 (0.0)                            | 1 (0.0)                            |
| <b>L03</b>                                                                                               | <i>Immunostimulants</i>                                    | 96 (1.0)                             | 58 (0.6)                           | 86 (0.9)                           | 78 (0.8)                           |
| <b>L04</b>                                                                                               | Immunosuppressants                                         | 34 (0.4)                             | 22 (0.2)                           | 27 (0.3)                           | 18 (0.2)                           |
| <b>M</b>                                                                                                 | <b>Musculo-skeletal system</b>                             | <b>571 (6.0)</b>                     | <b>416 (4.4)</b>                   | <b>437 (4.6)</b>                   | <b>380 (4.0)</b>                   |
| <b>M01</b>                                                                                               | <i>Antiinflammatory and antirheumatic products</i>         | 515 (5.4)                            | 378 (4.0)                          | 396 (4.2)                          | 342 (3.6)                          |
| <b>M02</b>                                                                                               | Topical products for joint and muscular pain               | 54 (0.6)                             | 37 (0.4)                           | 41 (0.4)                           | 41 (0.4)                           |
| <b>M03</b>                                                                                               | Muscle relaxants                                           | 8 (0.1)                              | 8 (0.1)                            | 4 (0.0)                            | 1 (0.0)                            |
| <b>M05</b>                                                                                               | Drugs for treatment of bone diseases                       | 1 (0.0)                              | -                                  | 1 (0.0)                            | -                                  |
| <b>M09</b>                                                                                               | Other drugs for disorders of the musculo-skeletal system   | 2 (0.0)                              | 2 (0.0)                            | 2 (0.0)                            | 2 (0.0)                            |
| -                                                                                                        | Unspecified medications for headache                       | 2 (0.0)                              | 1 (0.0)                            | 1 (0.0)                            | 1 (0.0)                            |
| <b>N</b>                                                                                                 | <b>Nervous system</b>                                      | <b>5,441 (57.5)</b>                  | <b>3,638 (38.5)</b>                | <b>4,247 (44.9)</b>                | <b>3,449 (36.5)</b>                |
| <b>N01</b>                                                                                               | Anesthetics                                                | 13 (0.1)                             | 10 (0.1)                           | 7 (0.1)                            | 8 (0.1)                            |
| <b>N02</b>                                                                                               | <i>Analgesics</i>                                          | 5,297 (56.0)                         | 3,562 (37.7)                       | 4,171 (44.1)                       | 3,387 (35.8)                       |
| <b>N03</b>                                                                                               | Antiepileptics                                             | 76 (0.8)                             | 46 (0.5)                           | 49 (0.5)                           | 42 (0.4)                           |
| <b>N05</b>                                                                                               | <i>Psycholeptics</i>                                       | 210 (2.2)                            | 173 (1.8)                          | 164 (1.7)                          | 138 (1.5)                          |
| <b>N06</b>                                                                                               | <i>Psychoanaleptics</i>                                    | 275 (2.9)                            | 211 (2.2)                          | 213 (2.3)                          | 179 (1.9)                          |
| <b>N07</b>                                                                                               | Other nervous system drugs                                 | 6 (0.1)                              | 4 (0.0)                            | 5 (0.1)                            | 3 (0.0)                            |
| -                                                                                                        | Unspecified analgesics/medications for the nervous system  | 52 (0.5)                             | 38 (0.4)                           | 43 (0.5)                           | 35 (0.4)                           |
| <b>P</b>                                                                                                 | <b>Antiparasitic products, insecticides and repellents</b> | <b>26 (0.3)</b>                      | <b>20 (0.2)</b>                    | <b>22 (0.2)</b>                    | <b>16 (0.2)</b>                    |
| <b>P01</b>                                                                                               | <i>Antiprotozoals</i>                                      | 25 (0.3)                             | 20 (0.2)                           | 22 (0.2)                           | 16 (0.2)                           |
| <b>P02</b>                                                                                               | Anthelmintics                                              | 1 (0.0)                              | -                                  | -                                  | -                                  |
| <b>R</b>                                                                                                 | <b>Respiratory system</b>                                  | <b>2,609 (27.6)</b>                  | <b>1,878 (19.9)</b>                | <b>2,047 (21.6)</b>                | <b>1,702 (18.0)</b>                |
| <b>R01</b>                                                                                               | <i>Nasal preparations</i>                                  | 1,547 (16.4)                         | 1,079 (11.4)                       | 1,229 (13.0)                       | 1,046 (11.1)                       |
| <b>R02</b>                                                                                               | Throat preparations                                        | 167 (1.8)                            | 110 (1.2)                          | 131 (1.4)                          | 122 (1.3)                          |
| <b>R03</b>                                                                                               | <i>Drugs for obstructive airway diseases</i>               | 396 (4.2)                            | 269 (2.8)                          | 304 (3.2)                          | 242 (2.6)                          |
| <b>R05</b>                                                                                               | Cough and cold preparations                                | 152 (1.6)                            | 103 (1.1)                          | 125 (1.3)                          | 101 (1.1)                          |
| <b>R06</b>                                                                                               | <i>Antihistamines for systemic use</i>                     | 912 (9.6)                            | 777 (8.2)                          | 740 (7.8)                          | 580 (6.1)                          |

| Anatomical Therapeutic Chemical (ATC) classification index<br>1 <sup>st</sup> and 2 <sup>nd</sup> levels |                                                   | Anytime during<br>pregnancy<br>n (%) | 1 <sup>st</sup> trimester<br>n (%) | 2 <sup>nd</sup> trimester<br>n (%) | 3 <sup>rd</sup> trimester<br>n (%) |
|----------------------------------------------------------------------------------------------------------|---------------------------------------------------|--------------------------------------|------------------------------------|------------------------------------|------------------------------------|
| <b>R07</b>                                                                                               | Other respiratory system products                 | 3 (0.0)                              | 2 (0.0)                            | 3 (0.0)                            | 3 (0.0)                            |
| -                                                                                                        | Unspecified medications of the respiratory system | 142 (1.5)                            | 101 (1.1)                          | 118 (1.2)                          | 99 (1.0)                           |
| <b>S</b>                                                                                                 | <b>Sensory organs</b>                             | <b>45 (0.5)</b>                      | <b>33 (0.3)</b>                    | <b>38 (0.4)</b>                    | <b>28 (0.3)</b>                    |
| <b>S01</b>                                                                                               | <i>Ophthalmologicals</i>                          | 33 (0.3)                             | 24 (0.3)                           | 28 (0.3)                           | 23 (0.2)                           |
| <b>S02</b>                                                                                               | Otologicals                                       | 5 (0.1)                              | 3 (0.0)                            | 4 (0.0)                            | 2 (0.0)                            |
| <b>S03</b>                                                                                               | Ophthalmological and otological preparations      | 3 (0.0)                              | 2 (0.0)                            | 2 (0.0)                            | 2 (0.0)                            |
| -                                                                                                        | Unspecified medications for eye disorders         | 5 (0.1)                              | 4 (0.0)                            | 5 (0.1)                            | 2 (0.0)                            |
| <b>V</b>                                                                                                 | <b>Various</b>                                    | 15 (0.2)                             | 10 (0.1)                           | 11 (0.1)                           | 9 (0.1)                            |
| <b>Total medication use (any ATC)</b>                                                                    |                                                   | <b>7,678 (81.2)</b>                  | <b>4,710 (49.8)</b>                | <b>5,538 (58.5)</b>                | <b>4,663 (49.3)</b>                |

\*The most common medication groups within each ATC class are in italics. Exposure timing is defined as follows: 1<sup>st</sup> trimester (gestational weeks 0-12), 2<sup>nd</sup> trimester (gestational week 13-24), 3<sup>rd</sup> trimester (gestational week 25 and up to childbirth).

**Appendix 4:** Prevalence of acute/short-term illnesses and most common medications used at any time during pregnancy by ATC level, indication for use and region (n=9,459) \*\*†

| Prevalence of acute/short-term illnesses in pregnancy and related medication use, overall and by drug groups | REGION                             |                                     |                                    |                                 |                                 |                             | Total               |
|--------------------------------------------------------------------------------------------------------------|------------------------------------|-------------------------------------|------------------------------------|---------------------------------|---------------------------------|-----------------------------|---------------------|
|                                                                                                              | Western Europe<br>n=3,201<br>n (%) | Northern Europe<br>n=2,820<br>n (%) | Eastern Europe<br>n=2,342<br>n (%) | North America<br>n=533<br>n (%) | South America<br>n=346<br>n (%) | Australia<br>n=217<br>n (%) |                     |
| <b>Prevalence of headache</b>                                                                                | 1,699 (53.1)                       | 1,657 (58.8)                        | 1,138 (48.6)                       | 373 (70.0)                      | 197 (56.9)                      | 147 (67.7)                  | 5,211 (55.1)        |
| <b>Medication use for headache, total</b>                                                                    | <b>1,027 (32.1)</b>                | <b>1,057 (37.5)</b>                 | <b>522 (22.3)</b>                  | <b>226 (42.4)</b>               | <b>121 (35.0)</b>               | <b>109 (50.2)</b>           | <b>3,062 (32.4)</b> |
| <i>By drug group</i>                                                                                         |                                    |                                     |                                    |                                 |                                 |                             |                     |
| Paracetamol (incl. combinations) (N02BE)                                                                     | 994 (31.1)                         | 1,009 (35.8)                        | 372 (15.9)                         | 206 (38.6)                      | 92 (26.6)                       | 101 (46.5)                  | 2,774 (29.3)        |
| Non-steroidal antiinflammatory drugs (M01A)                                                                  | 28 (0.9)                           | 78 (2.8)                            | 37 (1.6)                           | 18 (3.0)                        | 18 (5.2)                        | 2 (0.9)                     | 179 (1.9)           |
| Acetylsalicylic acid (incl. combinations) (N02BA)                                                            | 7 (0.2)                            | 4 (0.1)                             | 81 (3.5)                           | 1 (0.2)                         | 4 (1.2)                         | 2 (0.9)                     | 99 (1.0)            |
| Opioid analgesics (N02A)                                                                                     | 14 (0.4)                           | 46 (1.6)                            | 3 (0.1)                            | 3 (0.6)                         | -                               | 13 (6.0)                    | 79 (0.8)            |
| Selective serotonin (5-HT <sub>1</sub> ) agonists (N02CC)                                                    | 6 (0.2)                            | 22 (0.8)                            | 2 (0.1)                            | 3 (0.6)                         | -                               | 1 (0.5)                     | 34 (0.4)            |
| <b>Prevalence of heartburn</b>                                                                               | 2,196 (68.6)                       | 1,875 (66.5)                        | 1,425 (60.8)                       | 374 (70.2)                      | 248 (71.7)                      | 141 (65.0)                  | 6,259 (66.2)        |
| <b>Medication use for heartburn, total</b>                                                                   | <b>984 (30.7)</b>                  | <b>885 (31.4)</b>                   | <b>525 (22.4)</b>                  | <b>202 (37.9)</b>               | <b>88 (25.4)</b>                | <b>72 (33.2)</b>            | <b>2,756 (29.1)</b> |
| <i>By drug group</i>                                                                                         |                                    |                                     |                                    |                                 |                                 |                             |                     |
| Antacids (aluminium, salts combinations, antiflatulents)                                                     | 384 (12.0)                         | 503 (17.8)                          | 440 (18.8)                         | 51 (9.6)                        | 63 (18.2)                       | 20 (9.2)                    | 1,461 (15.4)        |
| Alginic acid complex/sucralfate/bismuth (A02BX)                                                              | 569 (17.8)                         | 332 (11.8)                          | 86 (3.7)                           | 4 (0.8)                         | 3 (0.9)                         | 14 (6.5)                    | 1,008 (10.7)        |
| Proton pump inhibitors (A02BC)                                                                               | 77 (2.4)                           | 86 (3.0)                            | 4 (0.2)                            | 13 (2.4)                        | 3 (0.9)                         | 7 (3.2)                     | 190 (2.0)           |
| Antacid with calcium (A02AC)                                                                                 | 20 (0.6)                           | 13 (0.5)                            | 10 (0.4)                           | 123 (23.1)                      | 2 (0.6)                         | 9 (4.1)                     | 177 (1.9)           |
| H <sub>2</sub> receptor antagonists (A02BA)                                                                  | 27 (0.8)                           | 27 (1.0)                            | 7 (0.3)                            | 45 (8.4)                        | 5 (1.4)                         | 38 (17.5)                   | 149 (1.6)           |
| <b>Prevalence of pain</b>                                                                                    | 2,150 (67.2)                       | 2,067 (73.3)                        | 1,484 (63.4)                       | 369 (69.2)                      | 248 (71.7)                      | 157 (72.4)                  | 6,475 (68.5)        |
| <b>Medication use for pain, total</b>                                                                        | <b>533 (16.7)</b>                  | <b>426 (15.1)</b>                   | <b>147 (6.3)</b>                   | <b>110 (20.6)</b>               | <b>80 (23.1)</b>                | <b>59 (27.2)</b>            | <b>1,355 (14.3)</b> |
| <i>By drug group</i>                                                                                         |                                    |                                     |                                    |                                 |                                 |                             |                     |
| Paracetamol (incl. combinations) (N02BE)                                                                     | 444 (13.9)                         | 374 (13.3)                          | 65 (2.8)                           | 99 (18.6)                       | 44 (12.7)                       | 55 (25.3)                   | 1,081 (11.4)        |
| Non-steroidal antiinflammatory drugs (M01A)                                                                  | 19 (0.6)                           | 36 (1.3)                            | 21 (0.9)                           | 11 (2.1)                        | 24 (6.9)                        | 3 (1.4)                     | 114 (1.2)           |
| Opioid analgesics (N02A)                                                                                     | 39 (1.2)                           | 51 (1.8)                            | 2 (0.1)                            | 4 (0.8)                         | -                               | 12 (5.5)                    | 108 (1.1)           |

|                                                                                                                     | REGION                |                        |                       |                      |                      |                   |                     |
|---------------------------------------------------------------------------------------------------------------------|-----------------------|------------------------|-----------------------|----------------------|----------------------|-------------------|---------------------|
| <b>Prevalence of acute/short-term illnesses in pregnancy and related medication use, overall and by drug groups</b> | <b>Western Europe</b> | <b>Northern Europe</b> | <b>Eastern Europe</b> | <b>North America</b> | <b>South America</b> | <b>Australia</b>  | <b>Total</b>        |
|                                                                                                                     | <b>n=3,201</b>        | <b>n=2,820</b>         | <b>n=2,342</b>        | <b>n=533</b>         | <b>n=346</b>         | <b>n=217</b>      | <b>n=9,459</b>      |
|                                                                                                                     | <b>n (%)</b>          | <b>n (%)</b>           | <b>n (%)</b>          | <b>n (%)</b>         | <b>n (%)</b>         | <b>n (%)</b>      | <b>n (%)</b>        |
| <b>Prevalence of nausea</b>                                                                                         | 2,324 (72.6)          | 2,244 (79.6)           | 1,503 (64.2)          | 409 (76.7)           | 238 (68.8)           | 173 (79.7)        | 6,891 (72.9)        |
| <b>Medication use for nausea, total</b>                                                                             | <b>413 (12.9)</b>     | <b>380 (13.5)</b>      | <b>140 (6.0)</b>      | <b>128 (24.0)</b>    | <b>71 (20.5)</b>     | <b>39 (18.0)</b>  | <b>1,171 (12.4)</b> |
| <i>By drug group</i>                                                                                                |                       |                        |                       |                      |                      |                   |                     |
| First generation antihistamines (R06A)                                                                              | 150 (4.7)             | 259 (9.2)              | 21 (0.9)              | 84 (15.9)            | 9 (2.6)              | 4 (1.8)           | 527 (5.6)           |
| Metoclopramide/domperidone/bromopride (A03FA)                                                                       | 134 (4.2)             | 69 (2.4)               | 27 (1.2)              | 10 (1.9)             | 45 (13.0)            | 25 (11.5)         | 310 (3.3)           |
| Serotonin antagonists (A04AA)                                                                                       | 4 (0.1)               | 8 (0.3)                | 1 (0.0)               | 28 (5.3)             | 1 (0.3)              | 11 (5.1)          | 53 (0.6)            |
| <b>Prevalence of UTI</b>                                                                                            | 513 (16.0)            | 327 (11.6)             | 452 (19.3)            | 93 (17.4)            | 92 (26.6)            | 25 (11.5)         | 1,502 (15.9)        |
| <b>Medication use for UTI, total</b>                                                                                | <b>315 (9.8)</b>      | <b>221 (7.8)</b>       | <b>192 (8.2)</b>      | <b>56 (10.5)</b>     | <b>63 (18.2)</b>     | <b>17 (7.8)</b>   | <b>864 (9.1)</b>    |
| <i>By drug group</i>                                                                                                |                       |                        |                       |                      |                      |                   |                     |
| Unspecified penicillins (J01C-)                                                                                     | 94 (2.9)              | 99 (3.5)               | 46 (2.0)              | 16 (3.0)             | 17 (4.9)             | 1 (0.5)           | 273 (2.9)           |
| NOS Antibacterials for systemic use (J01-)                                                                          | 116 (3.6)             | 85 (3.0)               | 25 (1.1)              | 20 (3.8)             | 14 (4.0)             | 6 (2.8)           | 266 (2.8)           |
| Penicillins with extended spectrum ± beta-lactamase inhibitors (J01CA/J01CR)                                        | 85 (2.7)              | 78 (2.8)               | 44 (1.9)              | 14 (2.6)             | 17 (4.9)             | 1 (0.5)           | 239 (2.5)           |
| Nitrofurantoin (J01XE)                                                                                              | 7 (0.2)               | 25 (0.9)               | 54 (2.3)              | 10 (1.9)             | 3 (0.9)              | 1 (0.5)           | 100 (1.1)           |
| Cephalosporins (J01D)                                                                                               | 20 (0.6)              | 10 (0.4)               | 36 (1.5)              | 2 (0.4)              | 11 (3.2)             | 6 (2.8)           | 85 (0.9)            |
| <b>Total prevalence of any acute/short-term illness</b>                                                             | <b>3,159 (98.7)</b>   | <b>2,803 (99.4)</b>    | <b>2,299 (98.2)</b>   | <b>523 (98.1)</b>    | <b>341 (98.6)</b>    | <b>214 (98.6)</b> | <b>9,339 (98.7)</b> |
| <b>Total medication use for any acute/short-term illness</b>                                                        | <b>2,224 (69.5)</b>   | <b>1,954 (69.3)</b>    | <b>1,474 (62.9)</b>   | <b>403 (75.6)</b>    | <b>250 (72.3)</b>    | <b>164 (75.6)</b> | <b>6,469 (68.4)</b> |

\*Countries are grouped into regions as shown in Figure 1.

†Sums of percentages do not add up to total medication use as only most common medication groups are presented. Rates do not include mineral supplements, vitamins, iron, and herbal or alternative medicine products.

Abbreviations: UTI: Urinary tract infection; NOS: Not otherwise specified.

**Appendix 5:** Prevalence of chronic/long-term disorders and most common medications used at any time during pregnancy by ATC level, indication for use and region (n=9,459) \*\*†

|                                                                                                                      | REGION           |                  |                 |                 |                 |                  | Total            |
|----------------------------------------------------------------------------------------------------------------------|------------------|------------------|-----------------|-----------------|-----------------|------------------|------------------|
|                                                                                                                      | Western Europe   | Northern Europe  | Eastern Europe  | North America   | South America   | Australia        |                  |
| <b>Prevalence of chronic/long-term disorders in pregnancy and related medication use, overall and by drug groups</b> | <b>n=3,201</b>   | <b>n=2,820</b>   | <b>n=2,342</b>  | <b>n=533</b>    | <b>n=346</b>    | <b>n=217</b>     | <b>n=9,459</b>   |
|                                                                                                                      | <i>n (%)</i>     | <i>n (%)</i>     | <i>n (%)</i>    | <i>n (%)</i>    | <i>n (%)</i>    | <i>n (%)</i>     | <i>n (%)</i>     |
| <b>Prevalence of hypothyroidism</b>                                                                                  | 130 (4.1)        | 118 (4.2)        | 105 (4.5)       | 22 (4.1)        | 11 (3.2)        | 6 (2.8)          | 392 (4.1)        |
| <b>Medication use for hypothyroidism, total</b>                                                                      | <b>118 (3.7)</b> | <b>113 (4.0)</b> | <b>96 (4.1)</b> | <b>21 (3.9)</b> | <b>9 (2.6)</b>  | <b>6 (2.8)</b>   | <b>363 (3.8)</b> |
| <i>By drug group</i>                                                                                                 |                  |                  |                 |                 |                 |                  |                  |
| Thyroid hormone, levothyroxine (H03AA01)                                                                             | 117 (3.7)        | 112 (4.0)        | 89 (3.8)        | 21 (3.9)        | 9 (2.6)         | 6 (2.8)          | 354 (3.7)        |
| <b>Prevalence of asthma</b>                                                                                          | 163 (5.1)        | 193 (6.8)        | 58 (2.5)        | 43 (8.1)        | 12 (3.5)        | 24 (11.1)        | 493 (5.2)        |
| <b>Medication use for asthma, total</b>                                                                              | <b>122 (3.8)</b> | <b>133 (4.7)</b> | <b>38 (1.6)</b> | <b>35 (6.6)</b> | <b>8 (2.3)</b>  | <b>24 (11.1)</b> | <b>360 (3.8)</b> |
| <i>By drug group</i>                                                                                                 |                  |                  |                 |                 |                 |                  |                  |
| Inhalant selective beta-2 agonists (R03AC)                                                                           | 94 (2.9)         | 66 (2.3)         | 26 (1.1)        | 32 (6.0)        | 7 (2.0)         | 24 (11.1)        | 249 (2.6)        |
| Adrenergics and other drugs for COPD (R03AK)                                                                         | 33 (1.0)         | 46 (1.6)         | 10 (0.4)        | 3 (0.6)         | 2 (0.6)         | 7 (3.2)          | 101 (1.1)        |
| Inhalant glucocorticoids (R03BA)                                                                                     | 28 (0.9)         | 40 (1.4)         | 13 (0.6)        | 12 (2.3)        | -               | 4 (1.8)          | 97 (1.0)         |
| Systemic selective beta-2 agonists (R03CC)                                                                           | -                | 30 (1.1)         | -               | 2 (0.4)         | -               | -                | 32 (0.3)         |
| <b>Prevalence of allergy</b>                                                                                         | 205 (6.4)        | 372 (13.2)       | 163 (7.0)       | 51 (9.6)        | 20 (5.8)        | 23 (10.6)        | 834 (8.8)        |
| <b>Medication use for allergy, total</b>                                                                             | <b>66 (2.1)</b>  | <b>171 (6.1)</b> | <b>65 (2.8)</b> | <b>24 (4.5)</b> | <b>13 (3.8)</b> | <b>17 (7.8)</b>  | <b>356 (3.8)</b> |
| <i>By drug group</i>                                                                                                 |                  |                  |                 |                 |                 |                  |                  |
| Second generation antihistamines (R06A)                                                                              | 29 (0.9)         | 104 (3.7)        | 27 (1.2)        | 17 (3.2)        | 4 (1.2)         | 5 (2.3)          | 186 (2.0)        |
| Nasal corticosteroids (R01AD)                                                                                        | 11 (0.3)         | 32 (1.1)         | 17 (0.7)        | -               | -               | 7 (3.2)          | 67 (0.7)         |
| First generation antihistamines (R06A)                                                                               | 13 (0.4)         | 29 (1.0)         | 10 (0.4)        | 9 (1.7)         | 6 (1.7)         | 4 (1.8)          | 71 (0.8)         |
| <b>Prevalence of depression</b>                                                                                      | 95 (3.0)         | 144 (5.1)        | 29 (1.2)        | 52 (9.8)        | 4 (1.2)         | 25 (11.5)        | 349 (3.7)        |
| <b>Medication use for depression, total</b>                                                                          | <b>61 (1.9)</b>  | <b>100 (3.5)</b> | <b>11 (0.5)</b> | <b>29 (5.4)</b> | <b>1 (0.3)</b>  | <b>23 (10.6)</b> | <b>225 (2.4)</b> |
| <i>By drug group</i>                                                                                                 |                  |                  |                 |                 |                 |                  |                  |
| SSRI antidepressants (N06AB)                                                                                         | 44 (1.4)         | 82 (2.9)         | 6 (0.3)         | 14 (2.6)        | -               | 14 (6.5)         | 160 (1.7)        |
| SNRIs/mianserin/trazodone/mirtazapine/bupropionAnxiolytic                                                            | 9 (0.3)          | 11 (0.4)         | 1 (0.0)         | 15 (2.8)        | -               | 7 (3.2)          | 43 (0.5)         |

| Prevalence of chronic/long-term disorders in pregnancy and related medication use, overall and by drug groups | REGION            |                   |                   |                   |                  |                  | Total               |
|---------------------------------------------------------------------------------------------------------------|-------------------|-------------------|-------------------|-------------------|------------------|------------------|---------------------|
|                                                                                                               | Western Europe    | Northern Europe   | Eastern Europe    | North America     | South America    | Australia        |                     |
|                                                                                                               | <b>n=3,201</b>    | <b>n=2,820</b>    | <b>n=2,342</b>    | <b>n=533</b>      | <b>n=346</b>     | <b>n=217</b>     | <b>n=9,459</b>      |
|                                                                                                               | <i>n (%)</i>      | <i>n (%)</i>      | <i>n (%)</i>      | <i>n (%)</i>      | <i>n (%)</i>     | <i>n (%)</i>     | <i>n (%)</i>        |
| s, benzodiazepine (N05BA)                                                                                     | 6 (0.2)           | 2 (0.1)           | 5 (0.2)           | -                 | -                | 1 (0.5)          | 14 (0.1)            |
| Antipsychotics quetiapine/olanzapine (N05AH)                                                                  | 2 (0.1)           | 4 (0.1)           | -                 | 3 (0.6)           | -                | 3 (1.4)          | 12 (0.1)            |
| <b>Total prevalence of any chronic/long-term disorder</b>                                                     | <b>617 (19.3)</b> | <b>831 (29.5)</b> | <b>576 (24.6)</b> | <b>154 (28.9)</b> | <b>51 (14.7)</b> | <b>72 (33.2)</b> | <b>2,301 (24.3)</b> |
| <b>Total medication use for any chronic/long-term disorder</b>                                                | <b>462 (14.4)</b> | <b>593 (21.0)</b> | <b>322 (13.7)</b> | <b>119 (22.3)</b> | <b>38 (11.0)</b> | <b>70 (32.3)</b> | <b>1,604 (17.0)</b> |

\*Countries are grouped into regions as shown in Figure 1.

†Sums of percentages do not add up to total medication use as only most common medication groups are presented. Rates do not include mineral supplements, vitamins, iron, and herbal or alternative medicine products.

Abbreviations: COPD: Chronic obstructive pulmonary disease; SSRI: Selective serotonin re-uptake inhibitors; SNRI: Serotonin–noradrenaline reuptake inhibitors.

STROBE Statement—Checklist of items that should be included in reports of *cross-sectional studies*

|                              | Item No | Recommendation                                                                                                                                                                                                                                                                                                                                                                                           |
|------------------------------|---------|----------------------------------------------------------------------------------------------------------------------------------------------------------------------------------------------------------------------------------------------------------------------------------------------------------------------------------------------------------------------------------------------------------|
| <b>Title and abstract</b>    | 1       | <b>X</b> (a) Indicate the study's design with a commonly used term in the title or the abstract                                                                                                                                                                                                                                                                                                          |
|                              |         | <b>X</b> (b) Provide in the abstract an informative and balanced summary of what was done and what was found                                                                                                                                                                                                                                                                                             |
| <b>Introduction</b>          |         |                                                                                                                                                                                                                                                                                                                                                                                                          |
| Background/rationale         | 2       | <b>X</b> Explain the scientific background and rationale for the investigation being reported                                                                                                                                                                                                                                                                                                            |
| Objectives                   | 3       | <b>X</b> State specific objectives, including any prespecified hypotheses                                                                                                                                                                                                                                                                                                                                |
| <b>Methods</b>               |         |                                                                                                                                                                                                                                                                                                                                                                                                          |
| Study design                 | 4       | <b>X</b> Present key elements of study design early in the paper                                                                                                                                                                                                                                                                                                                                         |
| Setting                      | 5       | <b>X</b> Describe the setting, locations, and relevant dates, including periods of recruitment, exposure, follow-up, and data collection                                                                                                                                                                                                                                                                 |
| Participants                 | 6       | <b>X</b> (a) Give the eligibility criteria, and the sources and methods of selection of participants                                                                                                                                                                                                                                                                                                     |
| Variables                    | 7       | <b>X</b> Clearly define all outcomes, exposures, predictors, potential confounders, and effect modifiers. Give diagnostic criteria, if applicable                                                                                                                                                                                                                                                        |
| Data sources/<br>measurement | 8*      | <b>X</b> For each variable of interest, give sources of data and details of methods of assessment (measurement). Describe comparability of assessment methods if there is more than one group                                                                                                                                                                                                            |
| Bias                         | 9       | <b>X</b> Describe any efforts to address potential sources of bias                                                                                                                                                                                                                                                                                                                                       |
| Study size                   | 10      | <b>X</b> Explain how the study size was arrived at                                                                                                                                                                                                                                                                                                                                                       |
| Quantitative variables       | 11      | <b>X</b> Explain how quantitative variables were handled in the analyses. If applicable, describe which groupings were chosen and why                                                                                                                                                                                                                                                                    |
| Statistical methods          | 12      | <b>X</b> (a) Describe all statistical methods, including those used to control for confounding<br>(b) Describe any methods used to examine subgroups and interactions<br><b>X</b> (c) Explain how missing data were addressed<br>(d) If applicable, describe analytical methods taking account of sampling strategy<br>(e) Describe any sensitivity analyses                                             |
| <b>Results</b>               |         |                                                                                                                                                                                                                                                                                                                                                                                                          |
| Participants                 | 13*     | <b>X</b> (a) Report numbers of individuals at each stage of study—eg numbers potentially eligible, examined for eligibility, confirmed eligible, included in the study, completing follow-up, and analysed<br>(b) Give reasons for non-participation at each stage<br>(c) Consider use of a flow diagram                                                                                                 |
| Descriptive data             | 14*     | <b>X</b> (a) Give characteristics of study participants (eg demographic, clinical, social) and information on exposures and potential confounders<br>(b) Indicate number of participants with missing data for each variable of interest                                                                                                                                                                 |
| Outcome data                 | 15*     | <b>X</b> Report numbers of outcome events or summary measures                                                                                                                                                                                                                                                                                                                                            |
| Main results                 | 16      | <b>X</b> (a) Give unadjusted estimates and, if applicable, confounder-adjusted estimates and their precision (eg, 95% confidence interval). Make clear which confounders were adjusted for and why they were included<br><b>X</b> (b) Report category boundaries when continuous variables were categorized<br>(c) If relevant, consider translating estimates of relative risk into absolute risk for a |

1  
2  
3  
4  
5  
6  
7  
8  
9  
10  
11  
12  
13  
14  
15  
16  
17  
18  
19  
20  
21  
22  
23  
24  
25  
26  
27  
28  
29  
30  
31  
32  
33  
34  
35  
36  
37  
38  
39  
40  
41  
42  
43  
44  
45  
46  
47  
48  
49  
50  
51  
52  
53  
54  
55  
56  
57  
58  
59  
60

meaningful time period

|                          |    |                                                                                                                                                                              |
|--------------------------|----|------------------------------------------------------------------------------------------------------------------------------------------------------------------------------|
| Other analyses           | 17 | Report other analyses done—eg analyses of subgroups and interactions, and sensitivity analyses                                                                               |
| <b>Discussion</b>        |    |                                                                                                                                                                              |
| Key results              | 18 | ✗ Summarise key results with reference to study objectives                                                                                                                   |
| Limitations              | 19 | ✗ Discuss limitations of the study, taking into account sources of potential bias or imprecision. Discuss both direction and magnitude of any potential bias                 |
| Interpretation           | 20 | ✗ Give a cautious overall interpretation of results considering objectives, limitations, multiplicity of analyses, results from similar studies, and other relevant evidence |
| Generalisability         | 21 | ✗ Discuss the generalisability (external validity) of the study results                                                                                                      |
| <b>Other information</b> |    |                                                                                                                                                                              |
| Funding                  | 22 | ✗ Give the source of funding and the role of the funders for the present study and, if applicable, for the original study on which the present article is based              |

\*Give information separately for exposed and unexposed groups.

**Note:** An Explanation and Elaboration article discusses each checklist item and gives methodological background and published examples of transparent reporting. The STROBE checklist is best used in conjunction with this article (freely available on the Web sites of PLoS Medicine at <http://www.plosmedicine.org/>, Annals of Internal Medicine at <http://www.annals.org/>, and Epidemiology at <http://www.epidem.com/>). Information on the STROBE Initiative is available at [www.strobe-statement.org](http://www.strobe-statement.org).





## Medication use in pregnancy: a multinational perspective

|                                 |                                                                                                                                                                                                                                                                                                                                                                                                                                                                                                                                                                                                                                                                                                                                                                                                                                                                                                                                                                                                                                                                                                                                                                                                                                                                                                                                                                                                                                                                                                                                                                                                                                                                                                                                                                                                                                                                                                                                                                                                                                                                                                                                             |
|---------------------------------|---------------------------------------------------------------------------------------------------------------------------------------------------------------------------------------------------------------------------------------------------------------------------------------------------------------------------------------------------------------------------------------------------------------------------------------------------------------------------------------------------------------------------------------------------------------------------------------------------------------------------------------------------------------------------------------------------------------------------------------------------------------------------------------------------------------------------------------------------------------------------------------------------------------------------------------------------------------------------------------------------------------------------------------------------------------------------------------------------------------------------------------------------------------------------------------------------------------------------------------------------------------------------------------------------------------------------------------------------------------------------------------------------------------------------------------------------------------------------------------------------------------------------------------------------------------------------------------------------------------------------------------------------------------------------------------------------------------------------------------------------------------------------------------------------------------------------------------------------------------------------------------------------------------------------------------------------------------------------------------------------------------------------------------------------------------------------------------------------------------------------------------------|
| Journal:                        | <i>BMJ Open</i>                                                                                                                                                                                                                                                                                                                                                                                                                                                                                                                                                                                                                                                                                                                                                                                                                                                                                                                                                                                                                                                                                                                                                                                                                                                                                                                                                                                                                                                                                                                                                                                                                                                                                                                                                                                                                                                                                                                                                                                                                                                                                                                             |
| Manuscript ID:                  | bmjopen-2013-004365.R1                                                                                                                                                                                                                                                                                                                                                                                                                                                                                                                                                                                                                                                                                                                                                                                                                                                                                                                                                                                                                                                                                                                                                                                                                                                                                                                                                                                                                                                                                                                                                                                                                                                                                                                                                                                                                                                                                                                                                                                                                                                                                                                      |
| Article Type:                   | Research                                                                                                                                                                                                                                                                                                                                                                                                                                                                                                                                                                                                                                                                                                                                                                                                                                                                                                                                                                                                                                                                                                                                                                                                                                                                                                                                                                                                                                                                                                                                                                                                                                                                                                                                                                                                                                                                                                                                                                                                                                                                                                                                    |
| Date Submitted by the Author:   | 08-Jan-2014                                                                                                                                                                                                                                                                                                                                                                                                                                                                                                                                                                                                                                                                                                                                                                                                                                                                                                                                                                                                                                                                                                                                                                                                                                                                                                                                                                                                                                                                                                                                                                                                                                                                                                                                                                                                                                                                                                                                                                                                                                                                                                                                 |
| Complete List of Authors:       | <p>Lupattelli, Angela; University of Oslo, School of Pharmacy<br/>         Spigset, Olav; St Olav's University Hospital, Department of Clinical Pharmacology; Children's and Women's Health, Norwegian University of Science and Technology, Department of Laboratory Medicine<br/>         Twigg, Michael; University of East Anglia, School of Pharmacy<br/>         Zagorodnikova, Ksenia; Northwest State Medical University n.a.I.I. Mechnikov, Northwest Medical Center for Drug Safety in Pregnancy &amp; Lactation<br/>         Mårdby, Ann-Charlotte ; The Sahlgrenska Academy, University of Gothenburg, Department of Public Health and Community Medicine<br/>         Moretti, Myla; The Hospital for Sick Children, University of Toronto, The Motherisk Program, Division of Clinical Pharmacology and Toxicology<br/>         Drozd, Mariola; Medical University of Lublin, Faculty of Pharmacy<br/>         Panchaud, Alice; University of Geneva and Lausanne, School of Pharmaceutical Sciences<br/>         Hämeen-Anttila, Katri; Finnish Medicines Agency,<br/>         Rieutord, Andre; APHP, GH HUPS, Hop Antoine Bécélère,, Service Pharmacie, Clamart France and Européenne de Formation pour les Pharmaciens<br/>         Gjergja Juraski, Romana; Children's Hospital Srebrnjak, Neuropediatric Unit<br/>         Odalovic, Marina; Faculty of pharmacy, University of Belgrade, Department of Social Pharmacy and Pharmaceutical Legislation<br/>         Kennedy, Debra; Royal Hospital for Women and University of NSW, MotherSafe<br/>         Rudolf, Gorazd; University Medical Centre Ljubljana, Clinical Institute of Medical Genetics<br/>         Juch, Herbert; Medical University of Graz, Research Unit Human Teratogens, Institute for Cell Biology, Histology and Embryology<br/>         Passier, Anneke; Netherlands Pharmacovigilance Centre Lareb, Teratology Information Service (TIS),<br/>         Björnsdóttir, Ingunn; University of Iceland,<br/>         Nordeng, Hedvig; University of Oslo, School of Pharmacy; Norwegian Institute of Public Health, Division of Mental Health</p> |
| <b>Primary Subject Heading</b>: | Obstetrics and gynaecology                                                                                                                                                                                                                                                                                                                                                                                                                                                                                                                                                                                                                                                                                                                                                                                                                                                                                                                                                                                                                                                                                                                                                                                                                                                                                                                                                                                                                                                                                                                                                                                                                                                                                                                                                                                                                                                                                                                                                                                                                                                                                                                  |
| Secondary Subject Heading:      | Obstetrics and gynaecology, Pharmacology and therapeutics, Public health                                                                                                                                                                                                                                                                                                                                                                                                                                                                                                                                                                                                                                                                                                                                                                                                                                                                                                                                                                                                                                                                                                                                                                                                                                                                                                                                                                                                                                                                                                                                                                                                                                                                                                                                                                                                                                                                                                                                                                                                                                                                    |
| Keywords:                       | Maternal medicine < OBSTETRICS, THERAPEUTICS, PUBLIC HEALTH                                                                                                                                                                                                                                                                                                                                                                                                                                                                                                                                                                                                                                                                                                                                                                                                                                                                                                                                                                                                                                                                                                                                                                                                                                                                                                                                                                                                                                                                                                                                                                                                                                                                                                                                                                                                                                                                                                                                                                                                                                                                                 |
|                                 |                                                                                                                                                                                                                                                                                                                                                                                                                                                                                                                                                                                                                                                                                                                                                                                                                                                                                                                                                                                                                                                                                                                                                                                                                                                                                                                                                                                                                                                                                                                                                                                                                                                                                                                                                                                                                                                                                                                                                                                                                                                                                                                                             |

1  
2  
3  
4  
5  
6  
7  
8  
9  
10  
11  
12  
13  
14  
15  
16  
17  
18  
19  
20  
21  
22  
23  
24  
25  
26  
27  
28  
29  
30  
31  
32  
33  
34  
35  
36  
37  
38  
39  
40  
41  
42  
43  
44  
45  
46  
47  
48  
49  
50  
51  
52  
53  
54  
55  
56  
57  
58  
59  
60

SCHOLARONE™  
Manuscripts

For peer review only

## Medication use in pregnancy: a multinational perspective

Lupattelli A,<sup>1</sup> Spigset O,<sup>2,3</sup> Twigg MJ,<sup>4</sup> Zagorodnikova K,<sup>5</sup> Mårdby AC,<sup>6</sup> Moretti ME,<sup>7</sup> Drozd M,<sup>8</sup> Panchaud A,<sup>9</sup> Hämeen-Anttila K,<sup>10</sup> Rieutord A,<sup>11</sup> Gjergja Juraski R,<sup>12</sup> Odalovic M,<sup>13</sup> Kennedy D,<sup>14</sup> Rudolf G,<sup>15</sup> Juch H,<sup>16</sup> Passier JLM,<sup>17</sup> Björnsdóttir I,<sup>1</sup> Nordeng H<sup>1,18</sup>.

<sup>1</sup>*School of Pharmacy, University of Oslo, Norway*

<sup>2</sup>*Department of Clinical Pharmacology, St Olav's University Hospital, Trondheim, Norway*

<sup>3</sup>*Department of Laboratory Medicine, Children's and Women's Health, Norwegian University of Science and Technology, Trondheim, Norway*

<sup>4</sup>*School of Pharmacy, University of East Anglia, Norwich Research Park, United Kingdom*

<sup>5</sup>*Northwest Medical Center for Drug Safety in Pregnancy & Lactation, Northwest State Medical University n.a.I.I.Mechnikov, St. Petersburg, Russia*

<sup>6</sup>*Department of Public Health and Community Medicine, The Sahlgrenska Academy, University of Gothenburg, Gothenburg, Sweden*

<sup>7</sup>*The Motherisk Program, Division of Clinical Pharmacology and Toxicology, The Hospital for Sick Children, University of Toronto, Ontario, Canada*

<sup>8</sup>*Faculty of Pharmacy, Medical University of Lublin, Poland*

<sup>9</sup>*School of Pharmaceutical Sciences, University of Geneva and Lausanne, Geneva, Switzerland*

<sup>10</sup>*Finnish Medicines Agency, Kuopio, Finland*

<sup>11</sup>*APHP, GH HUPS, Hop Antoine Béclère, Service Pharmacie, Clamart France and Européenne de Formation pour les Pharmaciens, France*

<sup>12</sup>*Children's Hospital Srebrnjak, Neuropediatric Unit, Zagreb, Croatia*

<sup>13</sup>*Department of Social Pharmacy and Pharmaceutical Legislation, Faculty of pharmacy, University of Belgrade, Serbia*

<sup>14</sup>*MotherSafe, Royal Hospital for Women and University of NSW, Randwick, Australia*

<sup>15</sup>*Clinical Institute of Medical Genetics, University Medical Centre Ljubljana, Slovenia*

<sup>16</sup>*Research Unit Human Teratogens, Institute for Cell Biology, Histology and Embryology, Medical University of Graz, Austria*

<sup>17</sup>*Teratology Information Service (TIS), Netherlands Pharmacovigilance Centre Lareb, the Netherlands*

<sup>18</sup>*Division of Mental Health, Norwegian Institute of Public Health, Oslo, Norway*

### Corresponding author:

Angela Lupattelli, MScPharm,

1  
2  
3  
4  
5  
6  
7  
8  
9  
10  
11  
12  
13  
14  
15  
16  
17  
18  
19  
20  
21  
22  
23  
24  
25  
26  
27  
28  
29  
30  
31  
32  
33  
34  
35  
36  
37  
38  
39  
40  
41  
42  
43  
44  
45  
46  
47  
48  
49  
50  
51  
52  
53  
54  
55  
56  
57  
58  
59  
60

Department of Pharmacy, School of Pharmacy, University of Oslo,  
PO Box 1068 Blindern, 0316 Oslo, Norway  
e-mail: angela.lupattelli@farmasi.uio.no; phone: +47 41343628 ; fax: +4722854402

**Key words:** pregnancy; drug utilization, maternal health; health behaviour; public health

**Word count** (excluding title page, abstract, references, figures and tables): 3571

For peer review only

## ABSTRACT

**Objectives:** Inter-country comparability between studies on medication use in pregnancy is difficult due to dissimilarities in study design and methodology. This study aimed to examine patterns and factors associated with medications use in pregnancy from a multinational perspective, with emphasis on type of medication utilized and indication for use.

**Design:** Cross-sectional, internet-based study performed within the period from 1-Oct-2011 to 29-Feb-2012. Uniform collection of drug utilization data was performed via an anonymous online questionnaire.

**Setting:** Multinational study in Europe (Western, Northern, and Eastern), North and South America, and Australia.

**Participants:** Pregnant women and new mothers with children less than one year of age.

**Primary and secondary outcome measures:** Prevalence and factors associated with medication use for acute/short-term illnesses, chronic/long-term disorders and over-the-counter (OTC) medication use.

**Results:** The study population included 9,459 women whereof 81.2% reported use of at least one medication (prescribed or OTC) during pregnancy. Overall, OTC medication use occurred in 66.9% of the pregnancies, whereas 68.4% and 17.0% of women reported use of at least one medication for treatment of acute/short-term illnesses and chronic/long-term disorders, respectively. The extent of self-reported

1  
2  
3 medicated illnesses and types of medication used by indication varied across regions,  
4  
5 especially in relation to urinary tract infections, depression or OTC nasal sprays.  
6

7 Women with higher age or lower educational level, housewives, or women with an  
8  
9 unplanned pregnancy were those most often reporting use of medication for  
10  
11 chronic/long-term disorders. Immigrant women in Western (aOR: 0.55, 95% CI: 0.34-  
12  
13 0.87) and Northern Europe (aOR: 0.50, 95% CI: 0.31-0.83) were less likely to report  
14  
15 use of medication for chronic/long-term disorders during pregnancy than non-  
16  
17 immigrants.  
18  
19

## 20 21 22 **Conclusions:**

23  
24 In this study, the majority of women in Europe, North America, South America and  
25  
26 Australia used at least one medication during pregnancy. There was a substantial  
27  
28 inter-region variability in the types of medication used.  
29  
30  
31  
32  
33  
34  
35  
36  
37  
38  
39  
40  
41  
42  
43  
44  
45  
46  
47  
48  
49  
50  
51  
52  
53  
54  
55  
56  
57  
58  
59  
60

## ARTICLE SUMMARY

### Strengths and limitations of this study

- Uniform data collection of drug utilization data across all participating countries allows for inter-country comparability of the prevalence of medication use during pregnancy, up to now impeded by differences in study design and methodology.
- The study adds a multinational perspective on OTC medication use during pregnancy to the limited number of studies quantifying the extent of self-medication during pregnancy.
- Lack of validity of the self-reported diagnoses is a limitation since all disorders and related medication use were self-reported by the study participants.
- An internet survey as a study method impedes calculation of a conventional response rate and may cause selection bias of the target population.

## INTRODUCTION

Ethical reasons preclude inclusion of pregnant women in the vast majority of pre-marketing clinical trials.[1] As a consequence, most medications are placed onto the market without a directly established safety profile in human pregnancy.[2] So far, few medications have been shown to be major teratogens, yet the risk of minor teratogenicity or of more subtle effects on fetal development still have to be determined for most of them.[3] Despite this, medication use during pregnancy is common. Mitchell et al. found that use of medications, either prescribed or purchased over-the-counter (OTC), occurred in 88.8% of all pregnancies in the USA.[4] In Europe, prevalence estimates of prescribed medication use vary considerably across countries, ranging from 26% in Serbia to 93% in France.[5-10] Such inter-country variability could, at least in part, be caused by differences in study design, methodology and exposure ascertainment across studies.[11] Uniform collection of drug utilization data during pregnancy between countries may overcome such drawbacks, allowing for inter-country comparability of prevalence estimates and shedding light on differences in prenatal care in the various countries.

Prior studies have addressed research priorities in this area such as presenting results on an individual drug level according to the indication of use, quantifying the extent of OTC and prescribed medication use during pregnancy, and taking into account inter-country comparability.[4] Only a few studies have individually examined maternal factors associated with specific types of medication use during pregnancy.[11-14]



1  
2  
3 The objectives of the current study were to examine patterns of medication use in  
4 pregnancy from a multinational perspective, with special emphasis on type of  
5 medication utilized, including OTC medications, and self-reported indications for use,  
6 and to identify maternal background factors potentially associated with medication  
7 use for acute/short-term illnesses, medication use for chronic/long-term disorders and  
8 OTC medication use during pregnancy.  
9  
10  
11  
12  
13  
14  
15

## 16 17 **METHODS**

### 18 19 **Study design and data collection**

20 This is a multinational, cross-sectional, internet-based study. Pregnant women at any  
21 gestational week and mothers with children less than one year of age were eligible to  
22 participate. Member countries of the European Network of Teratology Information  
23 Services (ENTIS), The Organization of Teratology Information Specialists (OTIS) in  
24 North America, MotherSafe in Australia and European institutions conducting public  
25 health research were invited to take part in the project. Of these, 18 countries  
26 participated (Australia, Austria, Canada, Croatia, Finland, France, Iceland, Italy,  
27 Netherlands, Norway, Poland, Russia, Serbia, Slovenia, Sweden, Switzerland, United  
28 Kingdom and USA). Data originating from some South and Central American  
29 countries were also collected through OTIS. Because of the low number of  
30 participants on the individual country level, the region of Central America was  
31 excluded and countries in South America were aggregated into one region. Data  
32 selection to achieve the final study sample was performed as depicted in Figure 1.  
33  
34  
35  
36  
37  
38  
39  
40  
41  
42  
43  
44  
45  
46  
47  
48  
49  
50  
51  
52  
53  
54  
55  
56  
57  
58  
59  
60

1  
2  
3 Data were collected through an anonymous on-line questionnaire administered by  
4  
5 Quest Back (<http://www.questback.com>) and accessible for a period of two months in  
6  
7 each participating country within the period 1-Oct-2011 to 29-Feb-2012. The  
8  
9 complete questionnaire is presented in Appendix 1. The questionnaire was open to the  
10  
11 public via utilization of banners (invitations to participate in the study) on national  
12  
13 websites and/or social networks commonly visited and consulted by pregnant women  
14  
15 and/or new mothers. Detailed information about recruitment tools utilized and internet  
16  
17 penetration rates is summarized in Appendix 2.  
18  
19

20  
21  
22 The questionnaire was first developed in Norwegian and English and then translated  
23  
24 into the other relevant languages. A pilot study was carried out in September 2011  
25  
26 (n=47) and elicited no major change to the questionnaire. Collected data were  
27  
28 scrutinized for the presence of potential duplicates (based on reported country of  
29  
30 residency, socio-demographic characteristics, date and exact time of questionnaire  
31  
32 completion) but none were identified.  
33  
34

### 35 36 **Exposure variables**

37  
38 Maternal socio-demographics (i.e. region of residency, age, educational level, mother  
39  
40 tongue, working status at time of conception, previous children, marital status and  
41  
42 unplanned pregnancy) and life-style characteristics (i.e. smoking status before and  
43  
44 during pregnancy and alcohol consumption after awareness of pregnancy) constituted  
45  
46 the exposure variables. To assess external validity, we compared socio-demographic  
47  
48 and life-style characteristics of our study population on an individual country level  
49  
50 with those of the general birthing population in the same country. Reports of National  
51  
52 Statistics Bureaus or previous national studies were utilized for this purpose. The ratio  
53  
54  
55  
56  
57  
58  
59  
60

1  
2  
3 between the number of respondents and the estimated number of live births in the 2-  
4  
5 months period was also examined for each country (Appendix 3).  
6  
7

### 8 **Outcome variables**

9  
10 Use of any medication, medication for acute/short-term illnesses, medication for  
11  
12 chronic/long-term disorders and OTC medication use during pregnancy constituted  
13  
14 the outcome variables. Participants were first confronted with a list of the most  
15  
16 common acute/short-term illnesses (i.e. nausea, heartburn, constipation, common cold,  
17  
18 urinary tract infections (UTIs), other infections, pain in the neck/back/pelvic girdle,  
19  
20 headache, sleeping problems) and the most prevalent chronic/long-term disorders (i.e.  
21  
22 asthma, allergy, hypothyroidism, rheumatic disorders, diabetes, epilepsy, depression,  
23  
24 anxiety, cardiovascular disease, other disorders) and asked whether they suffered/had  
25  
26 suffered from these conditions during pregnancy. In case of an affirmative response,  
27  
28 women were questioned about medication use for each individual indication as a free-  
29  
30 text entry. Use of OTC medications was also recorded. Recall was aided with a list of  
31  
32 five OTC medication categories: painkillers, nasal spray/drops, antinauseants,  
33  
34 antacids and laxatives, along with examples of brand name products of relevance in  
35  
36 each country. It was optional to report timing of exposure for each of the medication  
37  
38 use questions (the alternatives were gestational weeks 0-12 (1st trimester), 13-24 (2nd  
39  
40 trimester) and 25-delivery (3rd trimester)).  
41  
42  
43  
44  
45  
46

47 We defined a medicine as a single product containing one or more active ingredients.

48 We initially identified the main active ingredient(s) and formulation of the reported  
49  
50 medicinal products either in the relevant national medicines database or in the  
51  
52 “Martindale” textbook.[15] All recorded medications were coded into the  
53  
54 corresponding Anatomical Therapeutic Chemical (ATC) codes at the ATC 5<sup>th</sup> level  
55  
56  
57  
58  
59  
60

1  
2  
3 (i.e. the substance level) whenever possible, otherwise into the 2<sup>nd</sup>- 4<sup>th</sup> levels as  
4  
5 appropriate, in accordance with the World Health Organization ATC index.[16] The  
6  
7 OTC status of medications was crosschecked with the prescription policies within  
8  
9 each country. Whenever a prescription medication was reported under the OTC  
10  
11 question, this record was omitted from the analysis of OTC use but counted in the  
12  
13 estimation of total medication use (including prescription and OTC). Iron, mineral  
14  
15 supplements, vitamins, herbal remedies and any type of alternative medicine were  
16  
17 recorded separately and excluded from the estimation of medication use.  
18  
19

20  
21  
22 The required sample size calculation for the outcome variables on region and  
23  
24 individual country levels are outlined in Appendix 4. The expected prevalence  
25  
26 estimates were set according to results of previous studies.[5-10,17,18]  
27  
28

### 29 30 **Ethics**

31  
32 All participants gave informed consent by answering “Yes” to the question “Are you  
33  
34 willing to participate in the study?” The study was approved by the Regional Ethics  
35  
36 Committee, Region South-East in Norway. Ethical approval or study notification to  
37  
38 the relevant national Ethics Boards was achieved in specific countries as required by  
39  
40 national legislation. All data were handled and stored anonymously.  
41  
42

### 43 44 **Statistical analysis**

45  
46 Descriptive statistics were utilized as appropriate. Univariate and multivariate logistic  
47  
48 regression analyses were used to examine the association between maternal  
49  
50 characteristic and three categorical outcome measures (Yes/No): Medication use for  
51  
52 acute/short-term illnesses; medication use for chronic/long-term disorders; OTC  
53  
54 medication use. P-values of <0.05 were considered statistically significant. Data are  
55  
56  
57

1  
2  
3 presented as adjusted odds ratios (aOR) with 95% confidence intervals (CI). The  
4  
5 analyzed explanatory variables included all maternal socio-demographics and life-  
6  
7 style characteristics. After fitting the univariate logistic regression model for all  
8  
9 explanatory variables, the multivariate model was built and adjusted for all remaining  
10  
11 covariates. The Hosmer and Lemeshow test was used to assess goodness of fit of the  
12  
13 final multivariate model.[19] Analogue sub-analyses on individual region level were  
14  
15 performed. In these instances, region of residency was not included in the model. All  
16  
17 statistical analyses were performed by using the Statistical Package for the Social  
18  
19 Sciences (SPSS) version 20.0 (IBM® SPSS® Statistics).  
20  
21  
22  
23

## 24 RESULTS

### 25 Population characteristics

26  
27  
28 A total of 9,615 women accessed the on-line questionnaire whereof 98.6% completed  
29  
30 it. The participant flow-chart to achieve final study population (n=9,459) is depicted  
31  
32 in Figure 1. A total of 5,089 women (53.8%) were pregnant at the time of completion  
33  
34 of the questionnaire, whereas 4,370 women (46.2%) had delivered their babies within  
35  
36 the previous year. Of the former group, 1,095 (21.5%), 1,702 (33.4%) and 2,291  
37  
38 (45.0%) women were in the first, second and third trimester of pregnancy,  
39  
40 respectively. Of the latter group, 1,320 (30.2%), 947 (21.7%) and 2,102 (48.1%) had a  
41  
42 baby of age  $\leq 16$  weeks, 17-28 weeks, and  $\geq 29$  weeks, respectively. For two women  
43  
44 the time of gestation/baby's age was unknown. Overall, the birthing population in  
45  
46 each participating country was reflected quite well by the sample with respect to age,  
47  
48 parity and smoking habits (Appendix 3). However, there was a difference in terms of  
49  
50 educational level; on average, the women in the study had higher education than the  
51  
52 general birthing population in each country. In addition, participants in Sweden,  
53  
54  
55  
56  
57  
58  
59  
60

1  
2  
3 Austria, Iceland and Italy were slightly more often primiparous, whereas the  
4  
5 responders in Australia, USA, The Netherlands, Slovenia and Croatia were somewhat  
6  
7 older than the general birthing population.  
8  
9

### 10 **Total medication use**

11  
12 After exclusion of vitamins, mineral supplements and iron, use of at least one  
13  
14 medication either prescribed or OTC at any time during pregnancy was reported by  
15  
16 7,678 out of 9,459 women (81.2%). Figure 2 depicts prevalence estimates of total  
17  
18 medication use during pregnancy by region and country of residence. The extent of  
19  
20 OTC medication use, as well as medication use for acute/short-term illnesses and  
21  
22 chronic/long-term disorders is also outlined. The highest prevalence of total  
23  
24 medication use during pregnancy was observed in The Netherlands (95.1%), Iceland  
25  
26 (93.0%) and Finland (92.3%). The overall prevalence estimates of medication use in  
27  
28 pregnancy according to timing and drug class (ATC level 1 and 2) are presented in  
29  
30 Appendix 5. Medications for the nervous system (ATC class N) were the most  
31  
32 commonly used during pregnancy (57.5%), mostly due to paracetamol  
33  
34 (acetaminophen) and its combinations.  
35  
36  
37  
38  
39

40  
41 A corollary analysis according to pregnancy status showed that pregnant women  
42  
43 reported in a significantly lower degree than new mothers any medication use during  
44  
45 pregnancy (78.8% vs. 84.0%, p-value<0.001), as well as OTC medication use (63.0%  
46  
47 vs. 71.5%, p-value<0.001) and medication use for acute/short-term illnesses (66.2%  
48  
49 vs. 70.9%, p-value<0.001). In contrast, the difference in medication use for  
50  
51 chronic/long-term disorders was not significant (17.4% vs. 16.5%, p-value=0.271).  
52  
53  
54 None of the rates differed significantly when women in the third trimester of  
55  
56 pregnancy were compared to new mothers.  
57  
58  
59  
60

### Medication use according to indication

Headache, heartburn, pain, nausea and UTIs constituted the leading indications for use of medication during pregnancy among the acute/short-term illnesses analyzed. Hypothyroidism, asthma, allergy and depression were the leading indications for chronic/long-term medication use. Observed prevalence rates of these disorders, overall and by region of residency, are presented in Appendices 6 and 7, respectively, along with rates of total and specific medication use. Table 1 outlines prevalence estimates of OTC medication use during pregnancy by region and indication for use. Only the most common medication groups reported are presented. Inter-region variations in rates and types of medication used during pregnancy were observed both for acute/short-term illnesses (e.g. nausea and UTIs), chronic/long-term disorders (e.g. asthma and depression) and OTC medications (e.g. nasal spray).

### Factors associated with medication use

Factors associated with medication use during pregnancy according to type of medication utilized are presented in table 2. Use of chronic/long-term medications during pregnancy was reported in a significant larger extent by women in Northern Europe (aOR:1.68, 95% CI:1.46-1.94), North America (aOR:1.80, 95% CI:1.42-2.28) and Australia (aOR:2.76, 95% CI:2.03-3.76) compared to women in Western Europe. Older women or housewives, those with low education or with an unplanned pregnancy, were the ones most often reporting use of chronic/long-term medication. Sub-analysis on individual region level revealed that women not having the official language of the country of residency as mother tongue were less likely to report chronic/long-term medication use in Western (aOR: 0.55, 95% CI: 0.34-0.87) and Northern Europe (aOR: 0.50, 95% CI: 0.31-0.83), but not in the other regions.

**Table 1:** Use of OTC medication at any time during pregnancy by ATC level, indication for use and region (n=9,459) <sup>\*†</sup>

| OTC medication use, overall and by drug groups           | REGION              |                     |                   |                   |                   |                   | Total               |
|----------------------------------------------------------|---------------------|---------------------|-------------------|-------------------|-------------------|-------------------|---------------------|
|                                                          | Western Europe      | Northern Europe     | Eastern Europe    | North America     | South America     | Australian        |                     |
|                                                          | n=3,201             | n=2,820             | n=2,342           | n=533             | n=346             | n=217             | n=9,459             |
|                                                          | n (%)               | n (%)               | n (%)             | n (%)             | n (%)             | n (%)             | n (%)               |
| <b>OTC painkillers, total</b>                            | <b>1,714 (53.5)</b> | <b>1,773 (62.9)</b> | <b>734 (31.3)</b> | <b>284 (53.3)</b> | <b>127 (36.7)</b> | <b>151 (69.9)</b> | <b>4,783 (50.6)</b> |
| <i>By drug group</i>                                     |                     |                     |                   |                   |                   |                   |                     |
| Paracetamol (incl. combinations) (N02BE)                 | 1,655 (51.7)        | 1,735 (61.5)        | 630 (26.9)        | 263 (49.3)        | 87 (25.1)         | 146 (67.3)        | 4,516 (47.7)        |
| Non-steroidal antiinflammatory drugs (M01A)              | 70 (2.2)            | 182 (6.5)           | 68 (2.9)          | 40 (7.5)          | 59 (17.1)         | 7 (3.2)           | 426 (4.5)           |
| Acetylsalicylic acid (incl. combinations) (N02BA)        | 7 (0.2)             | 11 (0.4)            | 32 (1.4)          | 2 (0.4)           | 2 (0.6)           | 1 (0.5)           | 55 (0.6)            |
| Metamizole (N02BB02)                                     | -                   | 6 (0.2)             | 31 (1.3)          | 1 (0.2)           | 12 (3.5)          | -                 | 50 (0.5)            |
| <b>OTC antacids, total</b>                               | <b>1,011 (31.6)</b> | <b>883 (31.3)</b>   | <b>583 (24.9)</b> | <b>129 (24.2)</b> | <b>48 (13.9)</b>  | <b>76 (35.0)</b>  | <b>2,730 (28.9)</b> |
| <i>By drug group</i>                                     |                     |                     |                   |                   |                   |                   |                     |
| Antacids (aluminium, salts combinations, antiflatulents) | 472 (14.7)          | 550 (19.5)          | 508 (21.7)        | 47 (8.8)          | 36 (10.4)         | 54 (24.9)         | 1,667 (17.6)        |
| Alginic acid complex/sucralfate/bismuth (A02BX)          | 606 (18.9)          | 421 (14.9)          | 87 (3.7)          | 4 (0.8)           | 1 (0.3)           | 17 (7.8)          | 1,136 (12.0)        |
| H <sub>2</sub> receptor antagonists (A02BA)              | 20 (0.6)            | 20 (0.7)            | 16 (0.7)          | 57 (10.1)         | 10 (2.9)          | 17 (7.8)          | 137 (1.4)           |
| Antacids with calcium (A02AC)                            | 23 (0.7)            | 12 (0.4)            | 10 (0.4)          | 69 (12.9)         | 2 (0.6)           | 10 (4.6)          | 126 (1.3)           |
| Proton pump inhibitors (A02BC)                           | 38 (1.2)            | 52 (1.8)            | -                 | 10 (1.9)          | 2 (0.6)           | 5 (0.3)           | 107 (1.1)           |
| <b>OTC nasal sprays/drops, total</b>                     | <b>272 (8.5)</b>    | <b>742 (26.3)</b>   | <b>451 (19.3)</b> | <b>35 (6.6)</b>   | <b>7 (2.0)</b>    | <b>14 (6.5)</b>   | <b>1,521 (16.1)</b> |
| <i>By drug group</i>                                     |                     |                     |                   |                   |                   |                   |                     |
| Sympathomimetic nasal decongestants (R01AA/R01BB)        | 204 (6.4)           | 683 (24.2)          | 365 (15.6)        | 20 (3.8)          | 3 (0.9)           | 4 (1.8)           | 1,279 (13.5)        |
| Nasal corticosteroids (R01AD)                            | 31 (1.0)            | 49 (1.7)            | 12 (0.5)          | 5 (0.9)           | 2 (0.6)           | 10 (4.6)          | 109 (1.2)           |
| Nasal immunostimulants (low dose interferon) (L03A)      | -                   | -                   | 28 (1.2)          | -                 | -                 | -                 | 28 (0.3)            |
| <b>OTC laxatives, total</b>                              | <b>240 (7.5)</b>    | <b>227 (8.0)</b>    | <b>237 (10.1)</b> | <b>50 (9.4)</b>   | <b>8 (2.3)</b>    | <b>19 (8.8)</b>   | <b>781 (8.3)</b>    |
| <i>By drug group</i>                                     |                     |                     |                   |                   |                   |                   |                     |
| Osmotically acting laxatives (A06AD)                     | 159 (5.0)           | 171 (6.1)           | 197 (8.4)         | 2 (0.4)           | 2 (0.6)           | 8 (3.7)           | 539 (5.7)           |
| Contact laxatives (A06AB)                                | 28 (0.9)            | 44 (1.6)            | 18 (0.8)          | 7 (1.3)           | 6 (1.7)           | 2 (0.9)           | 105 (1.1)           |



| OTC medication use, overall and by drug groups | REGION              |                     |                     |                   |                   |                   | Total               |
|------------------------------------------------|---------------------|---------------------|---------------------|-------------------|-------------------|-------------------|---------------------|
|                                                | Western Europe      | Northern Europe     | Eastern Europe      | North America     | South America     | Australian        |                     |
|                                                | n=3,201             | n=2,820             | n=2,342             | n=533             | n=346             | n=217             | n=9,459             |
|                                                | <i>n (%)</i>        | <i>n (%)</i>        | <i>n (%)</i>        | <i>n (%)</i>      | <i>n (%)</i>      | <i>n (%)</i>      | <i>n (%)</i>        |
| Enemas (A06AG)                                 | 3 (0.1)             | 25 (0.9)            | 34 (1.5)            | 4 (0.8)           | -                 | 2 (0.9)           | 68 (0.7)            |
| Softeners, emollients (A06AA)                  | 8 (0.2)             | -                   | -                   | 38 (7.1)          | -                 | 6 (2.8)           | 52 (0.5)            |
| <b>OTC antinauseants, total</b>                | <b>263 (8.2)</b>    | <b>273 (9.7)</b>    | <b>41 (1.8)</b>     | <b>60 (11.3)</b>  | <b>28 (8.1)</b>   | <b>40 (18.4)</b>  | <b>705 (7.5)</b>    |
| <i>By drug group</i>                           |                     |                     |                     |                   |                   |                   |                     |
| First generation antihistamines (R06A)         | 141 (4.4)           | 256 (9.1)           | 7 (1.5)             | 55 (10.3)         | 5 (1.4)           | 5 (2.3)           | 469 (5.0)           |
| Metoclopramide/domperidone/bromopride (A03FA)  | 113 (3.5)           | 5 (0.2)             | 18 (0.8)            | 2 (0.4)           | 19 (5.5)          | 27 (12.4)         | 184 (1.9)           |
| <b>Total OTC medication use</b>                | <b>2,163 (67.6)</b> | <b>2,155 (76.4)</b> | <b>1,347 (57.5)</b> | <b>342 (64.2)</b> | <b>156 (45.1)</b> | <b>168 (77.4)</b> | <b>6,331 (66.9)</b> |

\*Countries are grouped into regions as shown in Figure 1.

†Sums of percentages do not add up to total medication use as only most common medication groups are presented. Rates do not include mineral supplements, vitamins, iron, and herbal or alternative medicine products.

Abbreviations: OTC: Over-The-Counter medications.

**Table 2:** Factors associated with medication use in pregnancy (n=9,459)\*

|                             | Medication use                              |                         |                                              |                         |                  |                         |
|-----------------------------|---------------------------------------------|-------------------------|----------------------------------------------|-------------------------|------------------|-------------------------|
|                             | For acute/short-term illnesses<br>(n=6,469) |                         | For chronic/long-term disorders<br>(n=1,604) |                         | OTC<br>(n=6,331) |                         |
|                             | n (%)                                       | aOR (95% CI)            | n (%)                                        | aOR (95% CI)            | n (%)            | aOR (95% CI)            |
| <b>Region of residency†</b> |                                             |                         |                                              |                         |                  |                         |
| Western Europe              | 2,224 (69.5)                                | Reference               | 462 (14.4)                                   | Reference               | 2,163 (67.6)     | Reference               |
| Northern Europe             | 1,954 (69.3)                                | 0.96 (0.86-1.08)        | 593 (21.0)                                   | <b>1.68 (1.46-1.94)</b> | 2,155 (76.4)     | <b>1.54 (1.36-1.74)</b> |
| Eastern Europe              | 1,474 (62.9)                                | <b>0.69 (0.61-0.78)</b> | 322 (13.7)                                   | 1.03 (0.87-1.21)        | 1,347 (57.5)     | <b>0.60 (0.53-0.67)</b> |
| North America               | 403 (75.6)                                  | <b>1.28 (1.03-1.60)</b> | 119 (22.3)                                   | <b>1.80 (1.42-2.28)</b> | 342 (64.2)       | <b>0.81 (0.66-0.99)</b> |
| South America               | 250 (82.3)                                  | 1.03 (0.79-1.34)        | 38 (11.0)                                    | 0.70 (0.48-1.01)        | 156 (45.1)       | <b>0.34 (0.27-0.44)</b> |
| Australia                   | 164 (75.6)                                  | 1.29 (0.93-1.79)        | 70 (32.3)                                    | <b>2.76 (2.03-3.76)</b> | 168 (77.4)       | <b>1.57 (1.12-2.20)</b> |
| <b>Maternal age (years)</b> |                                             |                         |                                              |                         |                  |                         |
| ≤20                         | 232 (70.5)                                  | 1.22 (0.93-1.60)        | 761 (14.7)                                   | <b>0.58 (0.39-0.87)</b> | 205 (62.3)       | 1.05 (0.81-1.36)        |
| 21-30                       | 3,531 (68.2)                                | Reference               | 33 (10.0)                                    | Reference               | 3,461 (66.8)     | Reference               |
| 31-40                       | 2,576 (68.6)                                | 0.90 (0.82-1.00)        | 764 (20.4)                                   | <b>1.44 (1.27-1.63)</b> | 2,531 (67.4)     | <b>0.85 (0.77-0.94)</b> |
| ≥41                         | 130 (66.3)                                  | 0.73 (0.54-1.00)        | 46 (23.5)                                    | <b>1.61 (1.13-2.29)</b> | 134 (68.4)       | 0.86 (0.62-1.19)        |
| <b>Previous children</b>    |                                             |                         |                                              |                         |                  |                         |
| No                          | 3,082 (65.5)                                | Reference               | 735 (15.6)                                   | Reference               | 2,949 (62.6)     | Reference               |
| Yes                         | 3,387 (71.3)                                | <b>1.34 (1.22-1.47)</b> | 869 (18.3)                                   | 1.08 (0.96-1.21)        | 3,382 (71.2)     | <b>1.58 (1.44-1.74)</b> |
| <b>Marital status</b>       |                                             |                         |                                              |                         |                  |                         |
| Married/cohabiting          | 6,066 (68.5)                                | Reference               | 1,503 (17.0)                                 | Reference               | 5,960 (67.3)     | Reference               |
| Single/divorced/others      | 403 (66.3)                                  | 0.91 (0.75-1.10)        | 101 (16.6)                                   | 1.06 (0.83-1.35)        | 371 (61.0)       | 0.91 (0.75-1.10)        |
| <b>Working status</b>       |                                             |                         |                                              |                         |                  |                         |
| Employed, but not as HCP    | 3,737 (66.8)                                | Reference               | 905 (16.2)                                   | Reference               | 3,667 (65.6)     | Reference               |
| HCP                         | 934 (74.4)                                  | <b>1.41 (1.23-1.63)</b> | 240 (19.1)                                   | 1.13 (0.96-1.33)        | 944 (75.2)       | <b>1.42 (1.23-1.64)</b> |
| Student                     | 592 (69.1)                                  | 1.11 (0.94-1.31)        | 128 (14.9)                                   | 1.04 (0.84-1.30)        | 578 (67.4)       | 1.10 (0.93-1.30)        |
| Housewife                   | 608 (72.6)                                  | 1.14 (0.96-1.35)        | 170 (20.3)                                   | <b>1.34 (1.10-1.63)</b> | 577 (68.9)       | 1.05 (0.88-1.24)        |
| Job seeker                  | 281 (66.0)                                  | 0.96 (0.78-1.20)        | 66 (15.5)                                    | 1.03 (0.78-1.36)        | 258 (60.6)       | 0.85 (0.68-1.05)        |
| Other than above            | 311 (65.2)                                  | 0.91 (0.75-1.12)        | 94 (19.7)                                    | <b>1.29 (1.01-1.65)</b> | 302 (63.3)       | 0.91 (0.74-1.12)        |
| <b>Educational level</b>    |                                             |                         |                                              |                         |                  |                         |

|                                                                                             | Medication use                              |                         |                                              |                         |                  |                         |
|---------------------------------------------------------------------------------------------|---------------------------------------------|-------------------------|----------------------------------------------|-------------------------|------------------|-------------------------|
|                                                                                             | For acute/short-term illnesses<br>(n=6,469) |                         | For chronic/long-term disorders<br>(n=1,604) |                         | OTC<br>(n=6,331) |                         |
|                                                                                             | n (%)                                       | aOR (95% CI)            | n (%)                                        | aOR (95% CI)            | n (%)            | aOR (95% CI)            |
| Less than high school                                                                       | 331 (72.7)                                  | 1.17 (0.93-1.49)        | 92 (20.2)                                    | <b>1.51 (1.15-1.97)</b> | 317 (69.7)       | <b>1.32 (1.04-1.67)</b> |
| High school                                                                                 | 1,864 (68.7)                                | Reference               | 428 (15.8)                                   | Reference               | 1,779 (65.6)     | Reference               |
| More than high school                                                                       | 3,574 (68.4)                                | 0.99 (0.89-1.11)        | 916 (17.5)                                   | 1.04 (0.91-1.20)        | 3,489 (66.8)     | 1.07 (0.96-1.19)        |
| Others, unspecified                                                                         | 700 (65.7)                                  | 0.82 (0.70-0.96)        | 168 (15.8)                                   | 0.94 (0.77-1.16)        | 746 (70.0)       | 1.13 (0.97-1.33)        |
| <b>Alcohol use after awareness of pregnancy</b>                                             |                                             |                         |                                              |                         |                  |                         |
| No                                                                                          | 5,270 (67.1)                                | Reference               | 1,322 (16.8)                                 | Reference               | 5,133 (65.3)     | Reference               |
| Yes                                                                                         | 1,144 (75.7)                                | <b>1.59 (1.39-1.81)</b> | 270 (17.9)                                   | 1.11 (0.95-1.29)        | 1,150 (76.1)     | <b>1.95 (1.71-2.23)</b> |
| <b>Smoking during pregnancy</b>                                                             |                                             |                         |                                              |                         |                  |                         |
| No                                                                                          | 5,835 (68.5)                                | Reference               | 1,441 (16.9)                                 | Reference               | 5,716 (67.0)     | Reference               |
| Yes, but less than before pregnancy                                                         | 530 (69.0)                                  | 1.08 (0.91-1.27)        | 130 (16.9)                                   | 1.01 (0.82-1.25)        | 511 (66.5)       | 1.06 (0.90-1.26)        |
| Yes, the same or more than before pregnancy                                                 | 88 (67.7)                                   | 0.95 (0.64-1.40)        | 28 (21.5)                                    | 1.19 (0.74-1.90)        | 89 (68.5)        | 1.21 (0.81-1.82)        |
| <b>Planned pregnancy</b>                                                                    |                                             |                         |                                              |                         |                  |                         |
| Yes                                                                                         | 5,836 (68.4)                                | Reference               | 1,427 (16.7)                                 | Reference               | 5,727 (67.2)     | Reference               |
| No                                                                                          | 616 (68.4)                                  | 0.96 (0.82-1.12)        | 173 (19.2)                                   | <b>1.29 (1.06-1.56)</b> | 587 (65.1)       | 1.00 (0.85-1.17)        |
| <b>First language different from the official main language in the country of residency</b> |                                             |                         |                                              |                         |                  |                         |
| No                                                                                          | 6,089 (68.5)                                | Reference               | 1,530 (17.2)                                 | Reference               | 5,972 (67.1)     | Reference               |
| Yes                                                                                         | 363 (67.2)                                  | 0.93 (0.76-1.12)        | 71 (13.1)                                    | <b>0.66 (0.50-0.86)</b> | 347 (64.3)       | 0.89 (0.74-1.08)        |

Abbreviation: HCP: health care provider.

\*Numbers may not add up due to missing values. Missing values are less than 5% of the total. Mineral supplements, vitamins, iron, herbal or alternative medicine products are not included in the medication use estimates.

†Countries are grouped into regions as shown in Figure 1.

## DISCUSSION

This is the first internet-based study examining patterns and factors associated with medication use during pregnancy on a multinational level. In all regions, approximately eight out of ten women reported use of at least one medication, either prescribed or OTC, during the course of their pregnancy. This finding is in line with previous research conducted in Europe, North America, South America and Australia,[4,20-25] though our estimates were somewhat higher in some of the Eastern European countries, e.g. Serbia, than those observed in a previous study.[5] Different recruitment strategies, i.e. internet-based in our study versus maternity care unit-/community pharmacy-based in the previous study could explain such discrepancy.

Overall, analgesics, antacids, nasal decongestants/antiallergics and systemic antibiotics were the medication groups dominating the drug utilization scenario, as also shown by previous research.[4,20-22] However, our study also provides insights into the proportion of medicated women among those suffering from a specific illness during pregnancy across the six regions. We found that approximately seven out of ten women who reported UTIs were treated with antibiotics during pregnancy. This related to all regions, except Eastern Europe where it was only four out of ten women. Since women may perceive dysuria without ascertainment of bacteriuria in the urine as UTI, an over-reporting of the illness could have occurred. Yet, a sub-optimal treatment of UTIs during pregnancy in Eastern Europe cannot be ruled out. The inter-country variability in the types of antibiotics used for UTIs could simply be explained by differences in prescribing practice,[26] presence of screening for bacteriuria in early pregnancy, or specific antibiotic resistance patterns.

1  
2  
3 Even though nausea was the condition affecting most women in all six regions, the  
4  
5 corresponding proportions of medicated nausea were generally low. This scenario is probably  
6  
7 due to two main factors: a) the predominantly mild character of nausea and the possibility of  
8  
9 non-pharmacological management (e.g. dietary advices); b) the reluctance of general  
10  
11 practitioners to prescribe antiemetics even though safety profile assessments are in  
12  
13 place.[27,28] As also shown in previous studies,[4,29] use of serotonin antagonists in North  
14  
15 America and Australia is increasing also in pregnancy compared to the other regions, eliciting  
16  
17 the need of sound studies assessing the safety profile of this drug group in pregnancy.  
18  
19

20  
21 In most regions, the self-reported prevalence of hypothyroidism was somewhat higher than  
22  
23 the reported hormone substitution rate. Because of its known association with adverse  
24  
25 pregnancy outcomes,[30] the unexpected finding of potential sub-optimal treatment of  
26  
27 hypothyroidism during pregnancy deserves attention. It could probably be due to a lack of  
28  
29 information about hypothyroidism typology and its diagnostic ascertainment in our study.  
30  
31

32  
33 In our study, depression was self-reported and not based on any psychometric assessment,  
34  
35 thus the observed substantial inter-regional variability in the extent of this disorder and related  
36  
37 medication use could have certainly been affected by women's attitudes in reporting. Our  
38  
39 estimate of medication use for depression in Australia was higher than that observed in a  
40  
41 recent study (10.6% versus 2.1%).[31] However, the similarity in self-reported depression  
42  
43 itself (11.5% versus 15.6%) suggests that our population might mostly comprise women who  
44  
45 did not discontinue their pharmacological therapy once they became pregnant. Our estimates  
46  
47 for North America and Western Europe were in line with recent literature showing an increase  
48  
49 in antidepressant use in pregnancy during the last years.[4,32]  
50  
51

52  
53  
54 In most regions approximately 60-70% of women reported use of at least one OTC  
55  
56 medication during the course of their pregnancy, mostly for pain conditions, heartburn and  
57  
58

1  
2  
3 upper airways disorders, indicating a substantially high rate of self-medication during  
4  
5 pregnancy. This estimate aligns with previous research carried out in North America.[17] Of  
6  
7 note, self-medication with OTC sympathomimetic nasal decongestants was more extensive in  
8  
9 Northern and Eastern Europe than in the remaining regions; this could be explained by the  
10  
11 time of the year when the data collection was performed.  
12  
13

14  
15 Region of residency was an important factor associated with medication use during pregnancy.  
16  
17 As also shown by Cleary et al.,[33] we found that rates of medication use among women  
18  
19 originally from Eastern Europe and South America were significantly lower than those  
20  
21 observed in Western Europe, North America and Australia. Such geographical differences  
22  
23 could be due to culture, variations in prenatal care assistance or access to medications in the  
24  
25 various regions and the related costs.  
26  
27

28  
29 Women working as health care providers, those consuming alcohol during pregnancy and  
30  
31 those with previous children were those more likely to use short-term and OTC medications,  
32  
33 possibly reflecting higher confidence in self-treatment and use of medications in general in  
34  
35 the former instance, and less anxiety for the pregnancy outcome in the latter two instances.  
36  
37

38  
39 Contrary to previous studies indicating an association between higher maternal education and  
40  
41 more prevalent use of medication during pregnancy,[14,17,23] we found that lower education  
42  
43 was associated with a higher use of OTC medications as well as medication for chronic/long-  
44  
45 term disorders (30-50% increased risk). Results of similar magnitude (30% increased risk)  
46  
47 were also observed by Olesen et al.[34], whereas Stokholm et al. [35] identified a stronger  
48  
49 association (2.3-fold increased risk) between low maternal education and use of antibiotic for  
50  
51 respiratory tract infections during pregnancy. One factor negatively associated with  
52  
53 chronic/long-term medication use was not having the official language of the country of  
54  
55 residency as mother tongue. This tendency was detected in Western and Northern Europe,  
56  
57  
58  
59  
60

1  
2  
3 rising concerns about the potential health risks for immigrant women in these two regions. As  
4  
5 shown by Hameen-Anttila et al., 57% of pregnant women have perceived information needs  
6  
7 about medications during pregnancy.[36] Thus, identification of potential users or non-users  
8  
9 of medication during pregnancy might be of clinical relevance, allowing tailored evidence-  
10  
11 based information about medication safety or outcome of sub-optimal medication of severe  
12  
13 medical conditions in pregnancy.  
14

### 15 16 17 **Strengths and limitations**

18  
19 The main strength is that data collection was performed uniformly across all participating  
20  
21 countries, allowing for inter-country comparison of the prevalence of medication use during  
22  
23 pregnancy. By quantifying the extent of self-medication with OTC drugs and medication use  
24  
25 according to self-reported indication, it was possible to determine the leading causes for  
26  
27 medication use among pregnant women. Categorization of maternal characteristics positively  
28  
29 associated with the various types of medications used during pregnancy enabled us to identify  
30  
31 which groups of women are more likely to need information about medication use during  
32  
33 pregnancy. The utilization of an anonymous web-based questionnaire enabled us to reach a  
34  
35 large proportion of the birthing population in several countries worldwide. However, we  
36  
37 cannot exclude the possibility that the women who decided to participate in the study differed  
38  
39 from the general birthing population in other ways that our analysis could not control for. In  
40  
41 most participating countries the study sample was large enough to warrant calculation of  
42  
43 prevalence estimates with a precision of 5%. However, less precise estimates were permitted  
44  
45 by the study sample in Austria, Iceland and The Netherlands (precision of 9-11%), as well as  
46  
47 in Australia, Canada, Croatia, Serbia, Slovenia, and USA (precision of 6-7%).  
48  
49  
50

51  
52  
53 One main limitation of the study is the lack of validity of the self-reported diagnoses. All  
54  
55 disorders were self-reported by the participants and hence dependent on the women's  
56  
57  
58  
59  
60

1  
2  
3 perception of the medical condition. Similarly, information about medication use during  
4 pregnancy was dependent on the accuracy of the women's reporting and recall. For new  
5 mothers, data were registered retrospectively; hence a risk of recall bias cannot be ruled out.  
6  
7 In specific countries (Australia, Canada, France, Russia, The Netherlands, and the USA) the  
8 study sample was a small proportion of the general birthing population; hence the  
9 generalizability of our findings for these specific countries should be interpreted with caution.  
10  
11 The questionnaire was only available through internet websites; by using this kind of  
12 approach a conventional response rate cannot be calculated and a selection bias of the target  
13 population cannot be ruled out. However, recent epidemiological studies indicate reasonable  
14 validity of web-based recruitment methods.[37,38] Also, the penetration rate of the internet  
15 either in households or at work is relatively high among women in childbearing age.[39-43]  
16  
17 Hence, the degree to which our findings can be extrapolated to the target population is based  
18 on the representativeness of the respondents to the general birthing populations in each  
19 country. The sample in each country had a somewhat higher educational level than the general  
20 birthing populations. Such a limitation might have led to biased estimates of the association  
21 between maternal education and medication use during pregnancy. Since many ailments  
22 requiring pharmacotherapy occur in mid or late pregnancy, inclusion of pregnant women at  
23 early gestation in the total material has somewhat inflated the prevalence of non-users of  
24 medications during pregnancy. Also, women with specific disorders or in need of information  
25 about medication use during pregnancy might have been more likely to consult internet  
26 websites and therefore participate in this study.  
27  
28  
29  
30  
31  
32  
33  
34  
35  
36  
37  
38  
39  
40  
41  
42  
43  
44  
45  
46  
47  
48  
49

## 50 51 **CONCLUSIONS**

52  
53 Use of medications for acute/short-term illnesses and chronic/long-term disorders as well as  
54 use of OTC medications, were common during pregnancy. The extent of medicated illnesses  
55  
56  
57



1  
2  
3 and types of medications used for the different indications varied across the six regions. This  
4  
5 was especially relevant for acute/short-term illnesses such as nausea and UTIs, but also for  
6  
7 chronic/long-term disorders such as hypothyroidism or depression. Women with higher age or  
8  
9 lower educational level, housewives, or women with an unplanned pregnancy were those  
10  
11 most often reporting chronic/long-term medication use, as opposed to immigrants residing in  
12  
13 Western and Northern Europe who reported the least use of this medication category. Future  
14  
15 research should definitely focus on this specific group of women, but also address more  
16  
17 insights into the outcome of sub-optimal medication of severe conditions in pregnancy.  
18  
19  
20  
21  
22  
23  
24  
25  
26  
27  
28  
29  
30  
31  
32  
33  
34  
35  
36  
37  
38  
39  
40  
41  
42  
43  
44  
45  
46  
47  
48  
49  
50  
51  
52  
53  
54  
55  
56  
57  
58  
59  
60

**ACKNOWLEDGMENTS**

We thank OTIS, ENTIS Scientific Board who reviewed the study protocol and all website providers who contributed to the recruitment phase. We are grateful to all the participating women who took part in this study.

**FUNDING:** This work was funded by the Norwegian Research Council (grant no. 216771/F11) and the Foundation for Promotion of Norwegian Pharmacies and the Norwegian Pharmaceutical Society.

**AUTHOR'S CONTRIBUTION:** AL, OS and HN conceived the idea for the study and participated in its design and coordination. AL drafted the manuscript and analyzed the data. MJT, KZ, ACM, MEM, MD, AP, KHA, AR, RGJ, MO, DK, GR, HJ, AP and IB contributed to the data collection. All authors contributed to the interpretation of the results and revised the manuscript critically for important intellectual content. All the authors read and approved the final manuscript.

**COMPETING INTERESTS:** None

**DATA SHARING STATEMENT:** No additional data are available. Researchers can apply for data access for subprojects within the overall aims of the main study 'The Multinational Medication Use in Pregnancy Study'.

**REFERENCES**

1. ACOG Committee Opinion No. 377: Research involving women. *Obstet Gynecol* 2007;**110**(3):731-6.
2. Adam MP, Polifka JE, Friedman JM. Evolving knowledge of the teratogenicity of medications in human pregnancy. *Am J Med Genet C Semin Med Genet* 2011;**157**(3):175-82.
3. Briggs GG, Freeman RK, Yaffe SJ. *Drugs in pregnancy and lactation*. [S.l.]: Lippincott Williams & Wilkins 2011.
4. Mitchell AA, Gilboa SM, Werler MM, et al. Medication use during pregnancy, with particular focus on prescription drugs: 1976-2008. *Am J Obstet Gynecol* 2011;**205**(1):51 e1-8.
5. Odalovic M, Vezmar Kovacevic S, Ilic K, et al. Drug use before and during pregnancy in Serbia. *Int J Clin Pharm* 2012;**34**(5):719-27.
6. Gagne JJ, Maio V, Berghella V, et al. Prescription drug use during pregnancy: a population-based study in Regione Emilia-Romagna, Italy. *Eur J Clin Pharmacol* 2008;**64**(11):1125-32.
7. Engeland A, Bramness JG, Daltveit AK, et al. Prescription drug use among fathers and mothers before and during pregnancy. A population-based cohort study of 106,000 pregnancies in Norway 2004-2006. *Br J Clin Pharmacol* 2008;**65**(5):653-60.
8. Bakker MK, Jentink J, Vroom F, et al. Drug prescription patterns before, during and after pregnancy for chronic, occasional and pregnancy-related drugs in the Netherlands. *BJOG* 2006;**113**(5):559-68.
9. Lacroix I, Hurault C, Sarramon MF, et al. Prescription of drugs during pregnancy: a study using EFEMERIS, the new French database. *Eur J Clin Pharmacol* 2009;**65**(8):839-46.
10. Malm H, Martikainen J, Klaukka T, et al. Prescription drugs during pregnancy and lactation--a Finnish register-based study. *Eur J Clin Pharmacol* 2003;**59**(2):127-33.

11. Daw JR, Hanley GE, Greyson DL, et al. Prescription drug use during pregnancy in developed countries: a systematic review. *Pharmacoepidemiol Drug Saf* 2011;**20**(9):895-902.
12. Rubin JD, Ferencz C, Loffredo C. Use of prescription and non-prescription drugs in pregnancy. *J Clin Epidemiol* 1993;**46**(6):581-89.
13. McKenna L, McIntyre M. What over-the-counter preparations are pregnant women taking? A literature review. *J Adv Nurs* 2006;**56**(6):636-45.
14. Odalovic M, Vezmar Kovacevic S, Nordeng H, et al. Predictors of the use of medications before and during pregnancy. *Int J Clin Pharm* 2013;**35**(3):408-16.
15. Martindale W, Sweetman SC. *Martindale : the complete drug reference*. London: Pharmaceutical Press, 2011.
16. WHO Collaborating Centre for Drugs Statistics Methodology. Guidelines for ATC classification and DDD assignment 2013. Oslo, 2012. Available at: [http://www.whocc.no/atc\\_ddd\\_index/](http://www.whocc.no/atc_ddd_index/). Accessed 17 March, 2012.
17. Refuerzo JS, Blackwell SC, Sokol RJ, et al. Use of Over-the-Counter Medications and Herbal Remedies in Pregnancy. *Amer J Perinatol* 2005;**22**(EFirst):321,24.
18. Sawicki E, Stewart K, Wong S, et al. Medication use for chronic health conditions by pregnant women attending an Australian maternity hospital. *Aust N Z J Obstet Gynaecol* 2011;**51**(4):333-38.
19. Hosmer DW, Lemeshow S. *Applied logistic regression*. New York: Wiley-Interscience 2000.
20. Nordeng H, Ystrøm E, Einarson A. Perception of risk regarding the use of medications and other exposures during pregnancy. *Eur J Clin Pharmacol* 2010;**66**(2):207-14.
21. Headley J, Northstone K, Simmons H, et al. Medication use during pregnancy: data from the Avon Longitudinal Study of Parents and Children. *Eur J Clin Pharmacol* 2004;**60**(5):355-61.

- 1  
2  
3 22. Medication during pregnancy: an intercontinental cooperative study. Collaborative Group  
4 on Drug Use in Pregnancy (C.G.D.U.P.). *Int J Gynaecol Obstet* 1992;**39**(3):185-96.  
5  
6  
7 23. Donati S, Baglio G, Spinelli A, et al. Drug use in pregnancy among Italian women. *Eur J*  
8  
9 *Clin Pharmacol* 2000;**56**(4):323-8.  
10  
11 24. Henry A, Crowther C. Patterns of medication use during and prior to pregnancy: the MAP  
12 study. *Aust N Z J Obstet Gynaecol* 2000;**40**(2):165-72.  
13  
14 25. Marín G, Cañas M, Homar C, et al. Uso de fármacos durante el período de gestación en  
15 embarazadas de Buenos Aires, Argentina. *Rev salud pública* 2010;**12**(5):722-31.  
16  
17 26. European Centre for Disease Prevention and Control. Surveillance of antimicrobial  
18 consumption in Europe, 2010. Stockholm: ECDC, 2013.  
19  
20 27. Smith J, Refuerzo J, Ramin S. Treatment and outcome of nausea and vomiting of  
21 pregnancy. In: Basow D, ed. UpToDate. Waltham, MA: UpToDate, 2013.  
22  
23 28. Gadsby R, Barnie-Adshead T, Sykes C. Why won't doctors prescribe antiemetics in  
24 pregnancy? *BMJ* 2011;**343**:d4387.  
25  
26 29. Raymond SH. A survey of prescribing for the management of nausea and vomiting in  
27 pregnancy in Australasia. *Aust N Z J Obstet Gynaecol* 2013.  
28  
29 30. Ross DS. Hypothyroidism during pregnancy: Clinical manifestations, diagnosis, and  
30 treatment. In: Basow DS, ed. UpToDate. Waltham, MA: UpToDate, 2013.  
31  
32 31. Lewis AJ, Bailey C, Galbally M. Anti-depressant use during pregnancy in Australia:  
33 findings from the Longitudinal Study of Australian Children. *Aust N Z J Public Health*  
34 2012;**36**(5):487-8.  
35  
36 32. Petersen I, Gilbert RE, Evans SJ, et al. Pregnancy as a major determinant for  
37 discontinuation of antidepressants: an analysis of data from The Health Improvement  
38 Network. *J Clin Psychiatry* 2011;**72**(7):979-85.  
39  
40  
41  
42  
43  
44  
45  
46  
47  
48  
49  
50  
51  
52  
53  
54  
55  
56  
57  
58  
59  
60

- 1  
2  
3 33. Cleary BJ, Butt H, Strawbridge JD, et al. Medication use in early pregnancy-prevalence  
4 and determinants of use in a prospective cohort of women. *Pharmacoepidemiol Drug Saf*  
5 2010;**19**(4):408-17.  
6  
7  
8  
9  
10 34. Olesen C, Thrane N, Henriksen TB, et al. Associations between socio-economic factors  
11 and the use of prescription medication during pregnancy: a population-based study among  
12 19,874 Danish women. *Eur J Clin Pharmacol* 2006;**62**(7):547-53.  
13  
14  
15 35. Stokholm J, Schjorring S, Pedersen L, et al. Prevalence and Predictors of Antibiotic  
16 Administration during Pregnancy and Birth. *PLoS One* 2013;**8**(12):e82932.  
17  
18  
19  
20 36. Hameen-Anttila K, Jyrkka J, Enlund H, et al. Medicines information needs during  
21 pregnancy: a multinational comparison. *BMJ Open* 2013;**3**(4).  
22  
23  
24 37. Ekman A, Dickman P, Klint Å, et al. Feasibility of Using Web-based Questionnaires in  
25 Large Population-based Epidemiological Studies. *Eur J Epidemiol* 2006;**21**(2):103-11.  
26  
27  
28  
29 38. van Gelder MM, Bretveld RW, Roeleveld N. Web-based questionnaires: the future in  
30 epidemiology? *Am J Epidemiol* 2010;**172**(11):1292-8.  
31  
32  
33  
34 39. Seybert H. Internet use in households and by individuals in 2011. Eurostat Statistics in  
35 focus. 2011; Available at: [http://epp.eurostat.ec.europa.eu/cache/ITY\\_OFFPUB/KS-SF-11-](http://epp.eurostat.ec.europa.eu/cache/ITY_OFFPUB/KS-SF-11-066/EN/KS-SF-11-066-EN.PDF)  
36 [066/EN/KS-SF-11-066-EN.PDF](http://epp.eurostat.ec.europa.eu/cache/ITY_OFFPUB/KS-SF-11-066/EN/KS-SF-11-066-EN.PDF). Accessed 13 November, 2012.  
37  
38  
39  
40 40. Internet World Stats. Usage and population statistics. 2012; Available at:  
41 <http://www.internetworldstats.com/>. Accessed 13 November, 2012.  
42  
43  
44  
45 41. Australian Bureau of Statistics. Household Use of Information Technology, Australia,  
46 2010-11. Available at: [http://www.abs.gov.au/ausstats/abs@.nsf/Latestproducts/8146.0Main](http://www.abs.gov.au/ausstats/abs@.nsf/Latestproducts/8146.0MainFeatures12010-11?opendocument&tabname=Summary&prodno=8146.0&issue=2010-11&num=&view=)  
47 [Features12010-11?opendocument&tabname=Summary&prodno=8146.0&issue=2010-](http://www.abs.gov.au/ausstats/abs@.nsf/Latestproducts/8146.0MainFeatures12010-11?opendocument&tabname=Summary&prodno=8146.0&issue=2010-11&num=&view=)  
48 [11&num=&view=](http://www.abs.gov.au/ausstats/abs@.nsf/Latestproducts/8146.0MainFeatures12010-11?opendocument&tabname=Summary&prodno=8146.0&issue=2010-11&num=&view=). Accessed 13 November, 2012.  
49  
50  
51  
52  
53  
54  
55  
56  
57  
58  
59  
60

1  
2  
3 42. Statistics Canada. Individual Internet use and E-commerce (2010). 2011; Available at:  
4  
5 <http://www.statcan.gc.ca/daily-quotidien/111012/dq111012a-eng.htm>. Accessed 13  
6  
7 November, 2012.

8  
9 43. United States Census Bureau. The 2012 Statistical Abstract. Information &  
10  
11 Communications: Internet Publishing and Broadcasting and Internet Usage. 2010; Available  
12  
13 at:  
14  
15 [http://www.census.gov/compendia/statab/cats/information\\_communications/internet\\_publishing\\_and\\_broadcasting\\_and\\_internet\\_usage.html](http://www.census.gov/compendia/statab/cats/information_communications/internet_publishing_and_broadcasting_and_internet_usage.html). Accessed 13 November, 2012.  
16  
17  
18  
19  
20  
21  
22  
23  
24  
25  
26  
27  
28  
29  
30  
31  
32  
33  
34  
35  
36  
37  
38  
39  
40  
41  
42  
43  
44  
45  
46  
47  
48  
49  
50  
51  
52  
53  
54  
55  
56  
57  
58  
59  
60

## Medication use in pregnancy: a multinational perspective

Lupattelli A,<sup>1</sup> Spigset O,<sup>2,3</sup> Twigg MJ,<sup>4</sup> Zagorodnikova K,<sup>5</sup> Mårdby AC,<sup>6</sup> Moretti ME,<sup>7</sup> Drozd M,<sup>8</sup> Panchaud A,<sup>9</sup> ~~Hämeen-Anttila K~~,<sup>10</sup> Rieutord A,<sup>11</sup> Gjergja Juraski R,<sup>12</sup> Odalovic M,<sup>13</sup> Kennedy D,<sup>14</sup> Rudolf G,<sup>15</sup> Juch H,<sup>16</sup> Passier JLM,<sup>17</sup> Björnsdóttir I,<sup>18</sup> Nordeng H<sup>1,19,18</sup>.

<sup>1</sup>*School of Pharmacy, University of Oslo, Norway*

<sup>2</sup>*Department of Clinical Pharmacology, St Olav's University Hospital, Trondheim, Norway*

<sup>3</sup>*Department of Laboratory Medicine, Children's and Women's Health, Norwegian University of Science and Technology, Trondheim, Norway*

<sup>4</sup>*School of Pharmacy, University of East Anglia, Norwich Research Park, United Kingdom*

<sup>5</sup>*Northwest Medical Center for Drug Safety in Pregnancy & Lactation, Northwest State Medical University n.a.I.I.Mechnikov, St. Petersburg, Russia*

<sup>6</sup>*Department of Public Health and Community Medicine, The Sahlgrenska Academy, University of Gothenburg, Gothenburg, Sweden*

<sup>7</sup>*The Motherisk Program, Division of Clinical Pharmacology and Toxicology, The Hospital for Sick Children, University of Toronto, Ontario, Canada*

<sup>8</sup>*Faculty of Pharmacy, Medical University of Lublin, Poland*

<sup>9</sup>*School of Pharmaceutical Sciences, University of Geneva and Lausanne, Geneva, Switzerland*

<sup>10</sup>*Finnish Medicines Agency, Kuopio, Finland*

<sup>11</sup>*APHP, GH HUPS, Hop Antoine Béclère, Service Pharmacie, Clamart France and Européenne de Formation pour les Pharmaciens, France*

<sup>12</sup>*Children's Hospital Srebrnjak, Neuropediatric Unit, Zagreb, Croatia*

<sup>13</sup>*Department of Social Pharmacy and Pharmaceutical Legislation, Faculty of pharmacy, University of Belgrade, Serbia*

<sup>14</sup>*MotherSafe, Royal Hospital for Women and University of NSW, Randwick, Australia*

<sup>15</sup>*Clinical Institute of Medical Genetics, University Medical Centre Ljubljana, Slovenia*

<sup>16</sup>*Research Unit Human Teratogens, Institute for Cell Biology, Histology and Embryology, Medical University of Graz, Austria*

<sup>17</sup>*Teratology Information Service (TIS), Netherlands Pharmacovigilance Centre Lareb, the Netherlands*

<sup>18</sup>*University of Iceland*

<sup>18,9</sup>*Division of Mental Health, Norwegian Institute of Public Health, Oslo, Norway*

### Corresponding author:

Angela Lupattelli, MScPharm,



1  
2  
3 Department of Pharmacy, School of Pharmacy, University of Oslo,  
4 PO Box 1068 Blindern, 0316 Oslo, Norway  
5  
6 e-mail: angela.lupattelli@farmasi.uio.no; phone: +47 41343628 ; fax: +4722854402  
7  
8

9 **Key words:** pregnancy; drug utilization, maternal health; health behaviour; public  
10  
11 health  
12

13  
14  
15 **Word count** (excluding title page, abstract, references, figures and tables): 3571  
16  
17  
18  
19  
20  
21  
22  
23  
24  
25  
26  
27  
28  
29  
30  
31  
32  
33  
34  
35  
36  
37  
38  
39  
40  
41  
42  
43  
44  
45  
46  
47  
48  
49  
50  
51  
52  
53  
54  
55  
56  
57  
58  
59  
60

**ABSTRACT**

**Objectives:** Inter-country comparability between studies on medication use in pregnancy is difficult due to dissimilarities in study design and methodology. This study aimed to examine patterns and **factors associated with** medications use in pregnancy from a multinational perspective, with emphasis on type of medication utilized and indication for use.

**Design:** Cross-sectional, internet-based study performed within the period from 1-Oct-2011 to 29-Feb-2012. Uniform collection of drug utilization data was performed via an anonymous online questionnaire.

**Setting:** Multinational study in Europe (Western, Northern, and Eastern), North and South America, and Australia.

**Participants:** Pregnant women and new mothers with children less than one year of age.

**Primary and secondary outcome measures:** Prevalence and **factors associated with** medication use for acute/**short-term** illnesses, chronic/**long-term** disorders and over-the-counter (OTC) medication use.

**Results:** The study population included 9,459 women whereof 81.2% reported use of at least one medication (prescribed or OTC) during pregnancy. **Overall**, OTC medication use occurred in 66.9% of the pregnancies, **whereas 68.4% and 17.0% of women reported use of at least one medication for treatment of acute/short-term illnesses and chronic/long-term disorders, respectively.** The extent of self-reported

1  
2  
3 medicated illnesses and types of medication used by indication varied across regions,  
4  
5 especially in relation to urinary tract infections, depression or OTC nasal sprays.  
6

7  
8 Women with higher age or lower educational level, housewives, or women with an  
9  
10 unplanned pregnancy were those most often reporting use of medication for  
11  
12 chronic/long-term chronic medication disorders. Immigrant women in Western (aOR:  
13  
14 0.55, 95% CI: 0.34-0.87) and Northern Europe (aOR: 0.50, 95% CI: 0.31-0.83) were  
15  
16 less likely to report use of medication for chronic/long-term disorders ~~chronic~~  
17  
18 ~~medication use~~ during pregnancy than non-immigrants.  
19

## 20 21 22 **Conclusions:**

23  
24 In this study, the majority of women in Europe, North America, South America and  
25  
26 Australia used at least one medication during pregnancy. There was a substantial  
27  
28 inter-region variability in the types of medication used.  
29  
30  
31  
32  
33  
34  
35  
36  
37  
38  
39  
40  
41  
42  
43  
44  
45  
46  
47  
48  
49  
50  
51  
52  
53  
54  
55  
56  
57  
58  
59  
60

## ARTICLE SUMMARY

### Strengths and limitations of this study

- Uniform data collection of drug utilization data across all participating countries allows for inter-country comparability of the prevalence of medication use during pregnancy, up to now impeded by differences in study design and methodology.
- The study adds a multinational perspective on OTC medication use during pregnancy to the limited number of studies quantifying the extent of self-medication during pregnancy.
- Lack of validity of the self-reported diagnoses **is a limitation** since all disorders and related medication use were self-reported by the study participants.
- An internet survey as a study method impedes calculation of a conventional response rate and may cause selection bias of the target population.

**FUNDING STATEMENT**

This work was supported by the Norwegian Research Council grant number 216771/F11 and by the Foundation for Promotion of Norwegian Pharmacies and the Norwegian Pharmaceutical Society.

**COMPETING INTERESTS:** None declared

For peer review only

## INTRODUCTION

Ethical reasons preclude inclusion of pregnant women in the vast majority of pre-marketing clinical trials.[1] As a consequence, most medications are placed onto the market without a directly established safety profile in human pregnancy.[2] So far, few medications have been shown to be major teratogens, yet the risk of minor teratogenicity or of more subtle effects on fetal development still have to be determined for most of them.[3] Despite this, medication use during pregnancy is common. Mitchell et al. found that use of medications, either prescribed or purchased over-the-counter (OTC), occurred in 88.8% of all pregnancies in the USA.[4] In Europe, prevalence estimates of prescribed medication use vary considerably across countries, ranging from 26% in Serbia to 93% in France.[5-10] Such inter-country variability could, at least in part, be caused by differences in study design, methodology and exposure ascertainment across studies.[11] Uniform collection of drug utilization data during pregnancy between countries may overcome such drawbacks, allowing for inter-country comparability of prevalence estimates and shedding light on differences in prenatal care in the various countries.

Prior studies have addressed research priorities in this area such as presenting results on an individual drug level according to the indication of use, quantifying the extent of OTC and prescribed medication use during pregnancy, and taking into account inter-country comparability.[4] Only a few studies have individually examined maternal factors associated with specific types of medication use during pregnancy.[11-14]

1  
2  
3 The objectives of the current study were to examine patterns of medication use in  
4 pregnancy from a multinational perspective, with special emphasis on type of  
5 medication utilized, including OTC medications, and self-reported indications for use,  
6 and to identify maternal background factors potentially associated with medication  
7 use for acute/short-term illnesses, medication use for chronic/long-term disorders and  
8 OTC medication use during pregnancy.  
9  
10  
11  
12  
13  
14  
15  
16

## 17 **METHODS**

### 18 **Study design and data collection**

19  
20 This is a multinational, cross-sectional, internet-based study. Pregnant women at any  
21 gestational week and mothers with children less than one year of age were eligible to  
22 participate. Member countries of the European Network of Teratology Information  
23 Services (ENTIS), The Organization of Teratology Information Specialists (OTIS) in  
24 North America, MotherSafe in Australia and European institutions conducting public  
25 health research were invited to take part in the project. Of these, 18 countries  
26 participated (Australia, Austria, Canada, Croatia, Finland, France, Iceland, Italy,  
27 Netherlands, Norway, Poland, Russia, Serbia, Slovenia, Sweden, Switzerland, United  
28 Kingdom and USA). Data originating from some South and Central American  
29 countries were also collected through OTIS. Because of the low number of  
30 participants on the individual country level, the region of Central America was  
31 excluded and countries in South America were aggregated into one region. Data  
32 selection to achieve the final study sample was performed as depicted in Figure 1.  
33  
34 Participants were categorized according to the reported country of residency and  
35 grouped into six regions: Western Europe, Northern Europe, Eastern Europe, North  
36 America, South America and Australia.  
37  
38  
39  
40  
41  
42  
43  
44  
45  
46  
47  
48  
49  
50  
51  
52  
53  
54  
55  
56  
57  
58  
59  
60

1  
2  
3 Data were collected through an anonymous on-line questionnaire administered by  
4 Quest Back (<http://www.questback.com>) and accessible for a period of two months in  
5 each participating country within the period 1-Oct-2011 to 29-Feb-2012. **The**  
6 **complete questionnaire is presented in Appendix 1.** The questionnaire was open to the  
7 public via utilization of banners (invitations to participate in the study) on national  
8 websites and/or social networks commonly visited and consulted by pregnant women  
9 and/or new mothers. Detailed information about recruitment tools utilized and internet  
10 penetration rates is summarized in Appendix 2.

11  
12 The questionnaire was first developed in Norwegian and English and then translated  
13 into the other relevant languages. A pilot study was carried out in September 2011  
14 (n=47) and elicited no major change to the questionnaire. Collected data were  
15 scrutinized for the presence of potential duplicates (based on reported country of  
16 residency, socio-demographic characteristics, date and exact time of questionnaire  
17 completion) but none were identified.

### 18 **Exposure variables**

19  
20 Maternal socio-demographics (i.e. region of residency, age, educational level, mother  
21 tongue, working status **at time of conception**, previous children, marital status and  
22 unplanned pregnancy) and life-style characteristics (i.e. smoking status before and  
23 during pregnancy and alcohol consumption after awareness of pregnancy) constituted  
24 the exposure variables. To assess external validity, we compared socio-demographic  
25 and life-style characteristics of our study population on an individual country level  
26 with those of the general birthing population in the same country. Reports of National  
27 Statistics Bureaus or previous national studies were utilized for this purpose. The ratio



1  
2  
3 between the number of respondents and the estimated number of live births in the 2-  
4  
5 months period was also examined for each country (Appendix 3).  
6  
7

### 8 **Outcome variables**

9  
10 Use of any medication, ~~prescribed~~ medication for acute/short-term illnesses,  
11 medication for chronic/long-term disorders and OTC medication use during  
12 pregnancy constituted the outcome variables. Participants were first confronted with a  
13  
14 list of the most common acute/short-term illnesses (i.e. nausea, heartburn,  
15  
16 constipation, common cold, urinary tract infections (UTIs), other infections, pain in  
17  
18 the neck/back/pelvic girdle, headache, sleeping problems) and the most prevalent  
19  
20 chronic/long-term disorders (i.e. asthma, allergy, hypothyroidism, rheumatic disorders,  
21  
22 diabetes, epilepsy, depression, anxiety, cardiovascular disease, other disorders),  
23  
24 and asked whether they suffered/had suffered from these conditions during pregnancy. In  
25  
26 case of an affirmative response, women were questioned about medication use for  
27  
28 each individual indication as a free-text entry. Use of OTC medications was also  
29  
30 recorded. Recall was aided with a list of five OTC medication categories: painkillers,  
31  
32 nasal spray/drops, antinauseants, antacids and laxatives, along with examples of brand  
33  
34 name products of relevance in each country. It was optional to report timing of  
35  
36 exposure for each of the medication use questions (the alternatives were gestational  
37  
38 weeks 0-12 (1st trimester), 13-24 (2nd trimester) and 25-delivery (3rd trimester)).  
39  
40  
41  
42  
43  
44  
45  
46

47 We defined a medicine as a single product containing one or more active ingredients.  
48  
49 We initially identified the main active ingredient(s) and formulation of the reported  
50  
51 medicinal products either in the relevant national medicines database or in the  
52  
53 “Martindale” textbook.[15] All recorded medications were coded into the  
54  
55 corresponding Anatomical Therapeutic Chemical (ATC) codes at the ATC 5<sup>th</sup> level  
56  
57  
58  
59  
60

1  
2  
3 (i.e. the substance level) whenever possible, otherwise into the 2<sup>nd</sup>- 4<sup>th</sup> levels as  
4  
5 appropriate, in accordance with the World Health Organization ATC index.[16] The  
6  
7 OTC status of medications was crosschecked with the prescription policies within  
8  
9 each country. Whenever a prescription medication was reported under the OTC  
10  
11 question, this record was omitted from the analysis of OTC use but counted in the  
12  
13 estimation of total medication use (including prescription and OTC). Iron, mineral  
14  
15 supplements, vitamins, herbal remedies and any type of alternative medicine were  
16  
17 recorded separately and excluded from the estimation of medication use.  
18  
19

20  
21  
22 **The required sample size calculation for the outcome variables on region and**  
23  
24 **individual country levels are outlined in Appendix 4. The expected prevalence**  
25  
26 **estimates were set according to results of previous studies.[5-10,17,18]**  
27  
28

### 29 **Ethics**

30  
31  
32 All participants gave informed consent by answering “Yes” to the question “Are you  
33  
34 willing to participate in the study?” The study was approved by the Regional Ethics  
35  
36 Committee, Region South-East in Norway. Ethical approval or study notification to  
37  
38 the relevant national Ethics Boards was achieved in specific countries as required by  
39  
40 national legislation. All data were handled and stored anonymously.  
41  
42

### 43 **Statistical analysis**

44  
45  
46 Descriptive statistics were utilized as appropriate. Univariate and multivariate logistic  
47  
48 regression analyses were used to examine the association between maternal  
49  
50 characteristic and three categorical outcome measures (Yes/No): Medication use for  
51  
52 acute/short-term illnesses; medication use for chronic/long-term disorders; OTC  
53  
54 medication use. P-values of <0.05 were considered statistically significant. Data are  
55  
56  
57  
58  
59  
60

1  
2  
3 presented as adjusted odds ratios (aOR) with 95% confidence intervals (CI). The  
4  
5 analyzed explanatory variables included all maternal socio-demographics and life-  
6  
7 style characteristics. After fitting the univariate logistic regression model for all  
8  
9 explanatory variables, the multivariate model was built and adjusted for all remaining  
10  
11 covariates. The Hosmer and Lemeshow test was used to assess goodness of fit of the  
12  
13 final multivariate model.[19] Analogue sub-analyses on individual region level were  
14  
15 performed. In these instances, region of residency was not included in the model. All  
16  
17 statistical analyses were performed by using the Statistical Package for the Social  
18  
19 Sciences (SPSS) version 20.0 (IBM® SPSS® Statistics).

## 22 23 24 RESULTS

### 25 26 Population characteristics

27  
28 A total of 9,615 women accessed the on-line questionnaire whereof 98.6% completed  
29  
30 it. The participant flow-chart to achieve final study population (n=9,459) is depicted  
31  
32 in Figure 1. A total of 5,089 women (53.8%) were pregnant at the time of completion  
33  
34 of the questionnaire, whereas 4,370 women (46.2%) had delivered their babies within  
35  
36 the previous year. Of the former group, 1,095 (21.5%), 1,702 (33.4%) and 2,291  
37  
38 (45.0%) women were in the first, second and third trimester of pregnancy,  
39  
40 respectively. Of the latter group, 1,320 (30.2%), 947 (21.7%) and 2,102 (48.1%) had a  
41  
42 baby of age  $\leq 16$  weeks, 17-28 weeks, and  $\geq 29$  weeks, respectively. For two women  
43  
44 the time of gestation/baby's age was unknown. Overall, the birthing population in  
45  
46 each participating country was reflected quite well by the sample with respect to age,  
47  
48 parity and smoking habits (Appendix 3). However, there was a difference in terms of  
49  
50 educational level; on average, the women in the study had higher education than the  
51  
52 general birthing population in each country. In addition, participants in Sweden,  
53  
54  
55  
56  
57  
58  
59  
60

1  
2  
3 Austria, Iceland and Italy were slightly more often primiparous, whereas the  
4  
5 responders in Australia, USA, The Netherlands, Slovenia and Croatia were somewhat  
6  
7 older than the general birthing population.  
8  
9

### 10 11 **Total medication use**

12  
13 After exclusion of vitamins, mineral supplements and iron, use of at least one  
14  
15 medication either prescribed or OTC at any time during pregnancy was reported by  
16  
17 7,678 out of 9,459 women (81.2%). Figure 2 depicts prevalence estimates of total  
18  
19 medication use during pregnancy by region and country of residence, ~~with specific~~  
20  
21 ~~rates according to inclusion or exclusion of vitamins, mineral supplements and iron.~~  
22  
23 The extent of OTC ~~use, as well as medication use for acute/short-term~~  
24  
25 ~~illnesses and chronic/long-term disorders use~~ is also outlined. The highest prevalence  
26  
27 of total medication use during pregnancy was observed in The Netherlands (95.1%),  
28  
29 Iceland (93.0%) and Finland (92.3%). The overall prevalence estimates of medication  
30  
31 use in pregnancy according to timing and drug class (ATC level 1 and 2) are  
32  
33 presented in Appendix 5. Medications for the nervous system (ATC class N) were the  
34  
35 most commonly used during pregnancy (57.5%), mostly due to paracetamol  
36  
37 (acetaminophen) and its combinations.  
38  
39  
40  
41  
42

43 ~~A corollary analysis according to pregnancy status showed that pregnant women~~  
44  
45 ~~reported in a significantly lower degree than new mothers any medication use during~~  
46  
47 ~~pregnancy (78.8% vs. 84.0%, p-value<0.001), as well as OTC medication use (63.0%~~  
48  
49 ~~vs. 71.5%, p-value<0.001) and medication use for acute/short-term illnesses (66.2%~~  
50  
51 ~~vs. 70.9%, p-value<0.001). In contrast, the difference in medication use for~~  
52  
53 ~~chronic/long-term disorders was not significant (17.4% vs. 16.5%, p-value=0.271).~~  
54  
55  
56  
57  
58  
59  
60

1  
2  
3 None of the rates differed significantly when women in the third trimester of  
4  
5 pregnancy were compared to new mothers.  
6  
7

### 8 9 **Medication use according to indication**

10  
11 Headache, heartburn, pain, nausea and UTIs constituted the leading indications for  
12  
13 use of medication during pregnancy among the acute/short-term illnesses analyzed.  
14  
15 Hypothyroidism, asthma, allergy and depression were the leading indications for  
16  
17 chronic/long-term medication use. Observed prevalence rates of these disorders,  
18  
19 overall and by region of residency, are presented in Appendices 6 and 7, respectively,  
20  
21 along with rates of total and specific medication use. Table 1 outlines prevalence  
22  
23 estimates of OTC medication use during pregnancy by region and indication for use.  
24  
25  
26 Only the most common medication groups reported are presented. Inter-region  
27  
28 variations in rates and types of medication used during pregnancy were observed both  
29  
30 for acute/short-term illnesses (e.g. nausea and UTIs), chronic/long-term disorders (e.g.  
31  
32 asthma and depression) and OTC medications (e.g. nasal spray).  
33  
34  
35

### 36 37 **Factors associated with medication use**

38  
39  
40 **Factors associated with** medication use during pregnancy according to type of  
41  
42 medication utilized are presented in table 2. Use of chronic/long-term medications  
43  
44 during pregnancy was reported in a significant larger extent by women in Northern  
45  
46 Europe (aOR:1.68, 95% CI:1.46-1.94), North America (aOR:1.80, 95% CI:1.42-2.28)  
47  
48 and Australia (aOR:2.76, 95% CI:2.03-3.76) compared to women in Western Europe.  
49  
50 Older women or housewives, those with low education or with an unplanned  
51  
52 pregnancy, were the ones most often reporting use of chronic/long-term medication.  
53  
54  
55 Sub-analysis on individual region level revealed that women not having the official  
56  
57  
58  
59  
60

1  
2  
3 language of the country of residency as mother tongue were less likely to report  
4  
5 chronic/long-term medication use in Western (aOR: 0.55, 95% CI: 0.34-0.87) and  
6  
7 Northern Europe (aOR: 0.50, 95% CI: 0.31-0.83), but not in the other regions.  
8  
9  
10  
11  
12  
13  
14  
15  
16  
17  
18  
19  
20  
21  
22  
23  
24  
25  
26  
27  
28  
29  
30  
31  
32  
33  
34  
35  
36  
37  
38  
39  
40  
41  
42  
43  
44  
45  
46  
47  
48  
49  
50  
51  
52  
53  
54  
55  
56  
57  
58  
59  
60

For peer review only

**Table 1:** Use of OTC medication at any time during pregnancy by ATC level, indication for use and region (n=9,459) <sup>\*†</sup>

| OTC medication use, overall and by drug groups           | REGION              |                     |                   |                   |                   |                   | Total               |
|----------------------------------------------------------|---------------------|---------------------|-------------------|-------------------|-------------------|-------------------|---------------------|
|                                                          | Western Europe      | Northern Europe     | Eastern Europe    | North America     | South America     | Australian        |                     |
|                                                          | n=3,201             | n=2,820             | n=2,342           | n=533             | n=346             | n=217             | n=9,459             |
|                                                          | n (%)               | n (%)               | n (%)             | n (%)             | n (%)             | n (%)             | n (%)               |
| <b>OTC painkillers, total</b>                            | <b>1,714 (53.5)</b> | <b>1,773 (62.9)</b> | <b>734 (31.3)</b> | <b>284 (53.3)</b> | <b>127 (36.7)</b> | <b>151 (69.9)</b> | <b>4,783 (50.6)</b> |
| <i>By drug group</i>                                     |                     |                     |                   |                   |                   |                   |                     |
| Paracetamol (incl. combinations) (N02BE)                 | 1,655 (51.7)        | 1,735 (61.5)        | 630 (26.9)        | 263 (49.3)        | 87 (25.1)         | 146 (67.3)        | 4,516 (47.7)        |
| Non-steroidal antiinflammatory drugs (M01A)              | 70 (2.2)            | 182 (6.5)           | 68 (2.9)          | 40 (7.5)          | 59 (17.1)         | 7 (3.2)           | 426 (4.5)           |
| Acetylsalicylic acid (incl. combinations) (N02BA)        | 7 (0.2)             | 11 (0.4)            | 32 (1.4)          | 2 (0.4)           | 2 (0.6)           | 1 (0.5)           | 55 (0.6)            |
| Metamizole (N02BB02)                                     | -                   | 6 (0.2)             | 31 (1.3)          | 1 (0.2)           | 12 (3.5)          | -                 | 50 (0.5)            |
| <b>OTC antacids, total</b>                               | <b>1,011 (31.6)</b> | <b>883 (31.3)</b>   | <b>583 (24.9)</b> | <b>129 (24.2)</b> | <b>48 (13.9)</b>  | <b>76 (35.0)</b>  | <b>2,730 (28.9)</b> |
| <i>By drug group</i>                                     |                     |                     |                   |                   |                   |                   |                     |
| Antacids (aluminium, salts combinations, antiflatulents) | 472 (14.7)          | 550 (19.5)          | 508 (21.7)        | 47 (8.8)          | 36 (10.4)         | 54 (24.9)         | 1,667 (17.6)        |
| Alginic acid complex/sucralfate/bismuth (A02BX)          | 606 (18.9)          | 421 (14.9)          | 87 (3.7)          | 4 (0.8)           | 1 (0.3)           | 17 (7.8)          | 1,136 (12.0)        |
| H <sub>2</sub> receptor antagonists (A02BA)              | 20 (0.6)            | 20 (0.7)            | 16 (0.7)          | 57 (10.1)         | 10 (2.9)          | 17 (7.8)          | 137 (1.4)           |
| Antacids with calcium (A02AC)                            | 23 (0.7)            | 12 (0.4)            | 10 (0.4)          | 69 (12.9)         | 2 (0.6)           | 10 (4.6)          | 126 (1.3)           |
| Proton pump inhibitors (A02BC)                           | 38 (1.2)            | 52 (1.8)            | -                 | 10 (1.9)          | 2 (0.6)           | 5 (0.3)           | 107 (1.1)           |
| <b>OTC nasal sprays/drops, total</b>                     | <b>272 (8.5)</b>    | <b>742 (26.3)</b>   | <b>451 (19.3)</b> | <b>35 (6.6)</b>   | <b>7 (2.0)</b>    | <b>14 (6.5)</b>   | <b>1,521 (16.1)</b> |
| <i>By drug group</i>                                     |                     |                     |                   |                   |                   |                   |                     |
| Sympathomimetic nasal decongestants (R01AA/R01BB)        | 204 (6.4)           | 683 (24.2)          | 365 (15.6)        | 20 (3.8)          | 3 (0.9)           | 4 (1.8)           | 1,279 (13.5)        |
| Nasal corticosteroids (R01AD)                            | 31 (1.0)            | 49 (1.7)            | 12 (0.5)          | 5 (0.9)           | 2 (0.6)           | 10 (4.6)          | 109 (1.2)           |
| Nasal immunostimulants (low dose interferon) (L03A)      | -                   | -                   | 28 (1.2)          | -                 | -                 | -                 | 28 (0.3)            |
| <b>OTC laxatives, total</b>                              | <b>240 (7.5)</b>    | <b>227 (8.0)</b>    | <b>237 (10.1)</b> | <b>50 (9.4)</b>   | <b>8 (2.3)</b>    | <b>19 (8.8)</b>   | <b>781 (8.3)</b>    |
| <i>By drug group</i>                                     |                     |                     |                   |                   |                   |                   |                     |
| Osmotically acting laxatives (A06AD)                     | 159 (5.0)           | 171 (6.1)           | 197 (8.4)         | 2 (0.4)           | 2 (0.6)           | 8 (3.7)           | 539 (5.7)           |
| Contact laxatives (A06AB)                                | 28 (0.9)            | 44 (1.6)            | 18 (0.8)          | 7 (1.3)           | 6 (1.7)           | 2 (0.9)           | 105 (1.1)           |

16

| OTC medication use, overall and by drug groups | REGION              |                     |                     |                   |                   |                   | Total               |
|------------------------------------------------|---------------------|---------------------|---------------------|-------------------|-------------------|-------------------|---------------------|
|                                                | Western Europe      | Northern Europe     | Eastern Europe      | North America     | South America     | Australian        |                     |
|                                                | <b>n=3,201</b>      | <b>n=2,820</b>      | <b>n=2,342</b>      | <b>n=533</b>      | <b>n=346</b>      | <b>n=217</b>      | <b>n=9,459</b>      |
|                                                | <b>n (%)</b>        | <b>n (%)</b>        | <b>n (%)</b>        | <b>n (%)</b>      | <b>n (%)</b>      | <b>n (%)</b>      | <b>n (%)</b>        |
| Enemas (A06AG)                                 | 3 (0.1)             | 25 (0.9)            | 34 (1.5)            | 4 (0.8)           | -                 | 2 (0.9)           | 68 (0.7)            |
| Softeners, emollients (A06AA)                  | 8 (0.2)             | -                   | -                   | 38 (7.1)          | -                 | 6 (2.8)           | 52 (0.5)            |
| <b>OTC antinauseants, total</b>                | <b>263 (8.2)</b>    | <b>273 (9.7)</b>    | <b>41 (1.8)</b>     | <b>60 (11.3)</b>  | <b>28 (8.1)</b>   | <b>40 (18.4)</b>  | <b>705 (7.5)</b>    |
| <i>By drug group</i>                           |                     |                     |                     |                   |                   |                   |                     |
| First generation antihistamines (R06A)         | 141 (4.4)           | 256 (9.1)           | 7 (1.5)             | 55 (10.3)         | 5 (1.4)           | 5 (2.3)           | 469 (5.0)           |
| Metoclopramide/domperidone/bromopride (A03FA)  | 113 (3.5)           | 5 (0.2)             | 18 (0.8)            | 2 (0.4)           | 19 (5.5)          | 27 (12.4)         | 184 (1.9)           |
| <b>Total OTC medication use</b>                | <b>2,163 (67.6)</b> | <b>2,155 (76.4)</b> | <b>1,347 (57.5)</b> | <b>342 (64.2)</b> | <b>156 (45.1)</b> | <b>168 (77.4)</b> | <b>6,331 (66.9)</b> |

\*Countries are grouped into regions as shown in Figure 1.

†Sums of percentages do not add up to total medication use as only most common medication groups are presented. Rates do not include mineral supplements, vitamins, iron, and herbal or alternative medicine products.

Abbreviations: OTC: Over-The-Counter medications.



**Table 2: Factors associated with medication use in pregnancy (n=9,459)\***

|                             | Medication use                              |                         |                                              |                         |                  |                         |
|-----------------------------|---------------------------------------------|-------------------------|----------------------------------------------|-------------------------|------------------|-------------------------|
|                             | For acute/short-term illnesses<br>(n=6,469) |                         | For chronic/long-term disorders<br>(n=1,604) |                         | OTC<br>(n=6,331) |                         |
|                             | n (%)                                       | aOR (95% CI)            | n (%)                                        | aOR (95% CI)            | n (%)            | aOR (95% CI)            |
| <b>Region of residency†</b> |                                             |                         |                                              |                         |                  |                         |
| Western Europe              | 2,224 (69.5)                                | Reference               | 462 (14.4)                                   | Reference               | 2,163 (67.6)     | Reference               |
| Northern Europe             | 1,954 (69.3)                                | 0.96 (0.86-1.08)        | 593 (21.0)                                   | <b>1.68 (1.46-1.94)</b> | 2,155 (76.4)     | <b>1.54 (1.36-1.74)</b> |
| Eastern Europe              | 1,474 (62.9)                                | <b>0.69 (0.61-0.78)</b> | 322 (13.7)                                   | 1.03 (0.87-1.21)        | 1,347 (57.5)     | <b>0.60 (0.53-0.67)</b> |
| North America               | 403 (75.6)                                  | <b>1.28 (1.03-1.60)</b> | 119 (22.3)                                   | <b>1.80 (1.42-2.28)</b> | 342 (64.2)       | <b>0.81 (0.66-0.99)</b> |
| South America               | 250 (82.3)                                  | 1.03 (0.79-1.34)        | 38 (11.0)                                    | 0.70 (0.48-1.01)        | 156 (45.1)       | <b>0.34 (0.27-0.44)</b> |
| Australia                   | 164 (75.6)                                  | 1.29 (0.93-1.79)        | 70 (32.3)                                    | <b>2.76 (2.03-3.76)</b> | 168 (77.4)       | <b>1.57 (1.12-2.20)</b> |
| <b>Maternal age (years)</b> |                                             |                         |                                              |                         |                  |                         |
| ≤20                         | 232 (70.5)                                  | 1.22 (0.93-1.60)        | 761 (14.7)                                   | <b>0.58 (0.39-0.87)</b> | 205 (62.3)       | 1.05 (0.81-1.36)        |
| 21-30                       | 3,531 (68.2)                                | Reference               | 33 (10.0)                                    | Reference               | 3,461 (66.8)     | Reference               |
| 31-40                       | 2,576 (68.6)                                | 0.90 (0.82-1.00)        | 764 (20.4)                                   | <b>1.44 (1.27-1.63)</b> | 2,531 (67.4)     | <b>0.85 (0.77-0.94)</b> |
| ≥41                         | 130 (66.3)                                  | 0.73 (0.54-1.00)        | 46 (23.5)                                    | <b>1.61 (1.13-2.29)</b> | 134 (68.4)       | 0.86 (0.62-1.19)        |
| <b>Previous children</b>    |                                             |                         |                                              |                         |                  |                         |
| No                          | 3,082 (65.5)                                | Reference               | 735 (15.6)                                   | Reference               | 2,949 (62.6)     | Reference               |
| Yes                         | 3,387 (71.3)                                | <b>1.34 (1.22-1.47)</b> | 869 (18.3)                                   | 1.08 (0.96-1.21)        | 3,382 (71.2)     | <b>1.58 (1.44-1.74)</b> |
| <b>Marital status</b>       |                                             |                         |                                              |                         |                  |                         |
| Married/cohabiting          | 6,066 (68.5)                                | Reference               | 1,503 (17.0)                                 | Reference               | 5,960 (67.3)     | Reference               |
| Single/divorced/others      | 403 (66.3)                                  | 0.91 (0.75-1.10)        | 101 (16.6)                                   | 1.06 (0.83-1.35)        | 371 (61.0)       | 0.91 (0.75-1.10)        |
| <b>Working status</b>       |                                             |                         |                                              |                         |                  |                         |
| Employed, but not as HCP    | 3,737 (66.8)                                | Reference               | 905 (16.2)                                   | Reference               | 3,667 (65.6)     | Reference               |
| HCP                         | 934 (74.4)                                  | <b>1.41 (1.23-1.63)</b> | 240 (19.1)                                   | 1.13 (0.96-1.33)        | 944 (75.2)       | <b>1.42 (1.23-1.64)</b> |
| Student                     | 592 (69.1)                                  | 1.11 (0.94-1.31)        | 128 (14.9)                                   | 1.04 (0.84-1.30)        | 578 (67.4)       | 1.10 (0.93-1.30)        |
| Housewife                   | 608 (72.6)                                  | 1.14 (0.96-1.35)        | 170 (20.3)                                   | <b>1.34 (1.10-1.63)</b> | 577 (68.9)       | 1.05 (0.88-1.24)        |
| Job seeker                  | 281 (66.0)                                  | 0.96 (0.78-1.20)        | 66 (15.5)                                    | 1.03 (0.78-1.36)        | 258 (60.6)       | 0.85 (0.68-1.05)        |
| Other than above            | 311 (65.2)                                  | 0.91 (0.75-1.12)        | 94 (19.7)                                    | <b>1.29 (1.01-1.65)</b> | 302 (63.3)       | 0.91 (0.74-1.12)        |
| <b>Educational level</b>    |                                             |                         |                                              |                         |                  |                         |

|                                                                                             | Medication use                              |                         |                                              |                         |                  |                         |
|---------------------------------------------------------------------------------------------|---------------------------------------------|-------------------------|----------------------------------------------|-------------------------|------------------|-------------------------|
|                                                                                             | For acute/short-term illnesses<br>(n=6,469) |                         | For chronic/long-term disorders<br>(n=1,604) |                         | OTC<br>(n=6,331) |                         |
|                                                                                             | n (%)                                       | aOR (95% CI)            | n (%)                                        | aOR (95% CI)            | n (%)            | aOR (95% CI)            |
| Less than high school                                                                       | 331 (72.7)                                  | 1.17 (0.93-1.49)        | 92 (20.2)                                    | <b>1.51 (1.15-1.97)</b> | 317 (69.7)       | <b>1.32 (1.04-1.67)</b> |
| High school                                                                                 | 1,864 (68.7)                                | Reference               | 428 (15.8)                                   | Reference               | 1,779 (65.6)     | Reference               |
| More than high school                                                                       | 3,574 (68.4)                                | 0.99 (0.89-1.11)        | 916 (17.5)                                   | 1.04 (0.91-1.20)        | 3,489 (66.8)     | 1.07 (0.96-1.19)        |
| Others, unspecified                                                                         | 700 (65.7)                                  | 0.82 (0.70-0.96)        | 168 (15.8)                                   | 0.94 (0.77-1.16)        | 746 (70.0)       | 1.13 (0.97-1.33)        |
| <b>Alcohol use after awareness of pregnancy</b>                                             |                                             |                         |                                              |                         |                  |                         |
| No                                                                                          | 5,270 (67.1)                                | Reference               | 1,322 (16.8)                                 | Reference               | 5,133 (65.3)     | Reference               |
| Yes                                                                                         | 1,144 (75.7)                                | <b>1.59 (1.39-1.81)</b> | 270 (17.9)                                   | 1.11 (0.95-1.29)        | 1,150 (76.1)     | <b>1.95 (1.71-2.23)</b> |
| <b>Smoking during pregnancy</b>                                                             |                                             |                         |                                              |                         |                  |                         |
| No                                                                                          | 5,835 (68.5)                                | Reference               | 1,441 (16.9)                                 | Reference               | 5,716 (67.0)     | Reference               |
| Yes, but less than before pregnancy                                                         | 530 (69.0)                                  | 1.08 (0.91-1.27)        | 130 (16.9)                                   | 1.01 (0.82-1.25)        | 511 (66.5)       | 1.06 (0.90-1.26)        |
| Yes, the same or more than before pregnancy                                                 | 88 (67.7)                                   | 0.95 (0.64-1.40)        | 28 (21.5)                                    | 1.19 (0.74-1.90)        | 89 (68.5)        | 1.21 (0.81-1.82)        |
| <b>Planned pregnancy</b>                                                                    |                                             |                         |                                              |                         |                  |                         |
| Yes                                                                                         | 5,836 (68.4)                                | Reference               | 1,427 (16.7)                                 | Reference               | 5,727 (67.2)     | Reference               |
| No                                                                                          | 616 (68.4)                                  | 0.96 (0.82-1.12)        | 173 (19.2)                                   | <b>1.29 (1.06-1.56)</b> | 587 (65.1)       | 1.00 (0.85-1.17)        |
| <b>First language different from the official main language in the country of residency</b> |                                             |                         |                                              |                         |                  |                         |
| No                                                                                          | 6,089 (68.5)                                | Reference               | 1,530 (17.2)                                 | Reference               | 5,972 (67.1)     | Reference               |
| Yes                                                                                         | 363 (67.2)                                  | 0.93 (0.76-1.12)        | 71 (13.1)                                    | <b>0.66 (0.50-0.86)</b> | 347 (64.3)       | 0.89 (0.74-1.08)        |

Abbreviation: HCP: health care provider.

\*Numbers may not add up due to missing values. Missing values are less than 5% of the total. Mineral supplements, vitamins, iron, herbal or alternative medicine products are not included in the medication use estimates.

†Countries are grouped into regions as shown in Figure 1.

## DISCUSSION

This is the first internet-based study examining patterns and factors associated with medication use during pregnancy on a multinational level. ~~In specific countries (Australia, Canada, France, Russia, The Netherlands, and the USA) the study sample was a small proportion of the general birthing population; hence the generalizability of our findings for these specific countries should be interpreted with caution.~~ In all regions, approximately eight out of ten women reported use of at least one medication, either prescribed or OTC, during the course of their pregnancy. This finding is in line with previous research conducted in Europe, North America, South America and Australia,[4,20-25] though our estimates were somewhat higher in some of the Eastern European countries, e.g. Serbia, than those observed in a previous study.[5] Different recruitment strategies, i.e. internet-based in our study versus maternity care unit-/community pharmacy-based in the previous study could explain such discrepancy.

Overall, analgesics, antacids, nasal decongestants/antiallergics and systemic antibiotics were the medication groups dominating the drug utilization scenario, as also shown by previous research.[4,20-22] However, our study also provides insights into the proportion of medicated women among those suffering from a specific illness during pregnancy across the six regions. We found that approximately seven out of ten women who reported UTIs were treated with antibiotics during pregnancy. This related to all regions, except Eastern Europe where it was only four out of ten women. Since women may perceive dysuria without ascertainment of bacteriuria in the urine as UTI, an over-reporting of the illness could have occurred. Yet, a sub-optimal treatment of UTIs during pregnancy in Eastern Europe cannot be ruled out. The inter-country variability in the types of antibiotics used for UTIs could simply be explained by

1  
2  
3 differences in prescribing practice,[26] presence of screening for bacteriuria in early  
4 pregnancy, or specific antibiotic resistance patterns.  
5  
6

7  
8 Even though nausea was the condition affecting most women in all six regions, the  
9 corresponding proportions of medicated nausea were generally low. This scenario is probably  
10 due to two main factors: a) the predominantly mild character of nausea and the possibility of  
11 non-pharmacological management (e.g. dietary advices); b) the reluctance of general  
12 practitioners to prescribe antinauseants even though safety profile assessments are in  
13 place.[27,28] As also shown in previous studies,[4,29] use of serotonin antagonists in North  
14 America and Australia is increasing also in pregnancy compared to the other regions, eliciting  
15 the need of sound studies assessing the safety profile of this drug group in pregnancy.  
16  
17

18  
19 In most regions, the self-reported prevalence of hypothyroidism was somewhat higher than  
20 the reported hormone substitution rate. Because of its known association with adverse  
21 pregnancy outcomes,[30] the unexpected finding of potential sub-optimal treatment of  
22 hypothyroidism during pregnancy deserves attention. It could probably be due to a lack of  
23 information about hypothyroidism typology and its diagnostic ascertainment in our study.  
24  
25

26  
27 In our study, depression was self-reported and not based on any psychometric assessment,  
28 thus the observed substantial inter-regional variability in the extent of this disorder and related  
29 medication use could have certainly been affected by women's attitudes in reporting. Our  
30 estimate of medication use for depression in Australia was higher than that observed in a  
31 recent study (10.6% versus 2.1%).[31] However, the similarity in self-reported depression  
32 itself (11.5% versus 15.6%) suggests that our population might mostly comprise women who  
33 did not discontinue their pharmacological therapy once they became pregnant. Our estimates  
34 for North America and Western Europe were in line with recent literature showing an increase  
35 in antidepressant use in pregnancy during the last years.[4,32]  
36  
37  
38  
39  
40  
41  
42  
43  
44  
45  
46  
47  
48  
49  
50  
51  
52  
53  
54  
55  
56  
57

1  
2  
3 In most regions approximately 60-70% of women reported use of at least one OTC  
4 medication during the course of their pregnancy, mostly for pain conditions, heartburn and  
5 upper airways disorders, indicating a substantially high rate of self-medication during  
6 pregnancy. This estimate aligns with previous research carried out in North America.[17] Of  
7 note, self-medication with OTC sympathomimetic nasal decongestants was more extensive in  
8 Northern and Eastern Europe than in the remaining regions; this could be explained by the  
9 time of the year when the data collection was performed.

10  
11 Region of residency was an important factor associated with medication use during pregnancy.  
12 As also shown by Cleary et al.,[33] we found that rates of medication use among women  
13 originally from Eastern Europe and South America were significantly lower than those  
14 observed in Western Europe, North America and Australia. Such geographical differences  
15 could be due to culture, variations in prenatal care assistance or access to medications in the  
16 various regions and the related costs.

17  
18 Women working as health care providers, those consuming alcohol during pregnancy and  
19 those with previous children were those more likely to use short-term and OTC medications,  
20 possibly reflecting higher confidence in self-treatment and use of medications in general in  
21 the former instance, and less anxiety for the pregnancy outcome in the latter two instances.

22  
23 **Contrary to previous studies indicating an association between higher maternal education and**  
24 **more prevalent use of medication during pregnancy,[14,17,23] we found that lower education**  
25 **was associated with a higher use of OTC medications as well as medication for chronic/long-**  
26 **term disorders (30-50% increased risk). Results of similar magnitude (30% increased risk)**  
27 **were also observed by Olesen et al.[34], whereas Stokholm et al. [35] identified a stronger**  
28 **association (2.3-fold increased risk) between low maternal education and use of antibiotic for**  
29 **respiratory tract infections during pregnancy. One factor negatively associated with**

1  
2  
3 chronic/long-term medication use was not having the official language of the country of  
4 residency as mother tongue. This tendency was detected in Western and Northern Europe,  
5  
6 rising concerns about the potential health risks for immigrant women in these two regions. As  
7  
8 shown by Hameen-Anttila et al., 57% of pregnant women have perceived information needs  
9  
10 about medications during pregnancy.[36] Thus, identification of potential users or non-users  
11  
12 of medication during pregnancy might be of clinical relevance, allowing tailored evidence-  
13  
14 based information about medication safety or outcome of sub-optimal medication of severe  
15  
16 medical conditions in pregnancy.  
17  
18  
19

### 20 21 **Strengths and limitations**

22  
23 The main strength is that data collection was performed uniformly across all participating  
24  
25 countries, allowing for inter-country comparison of the prevalence of medication use during  
26  
27 pregnancy. By quantifying the extent of self-medication with OTC drugs and medication use  
28  
29 according to self-reported indication, it was possible to determine the leading causes for  
30  
31 medication use among pregnant women. Categorization of maternal characteristics positively  
32  
33 associated with the various types of medications used during pregnancy enabled us to identify  
34  
35 which groups of women are more likely to need information about medication use during  
36  
37 pregnancy. The utilization of an anonymous web-based questionnaire enabled us to reach a  
38  
39 large proportion of the birthing population in several countries worldwide. However, we  
40  
41 cannot exclude the possibility that the women who decided to participate in the study differed  
42  
43 from the general birthing population in other ways that our analysis could not control for. **In**  
44  
45 **most participating countries the study sample was large enough to warrant calculation of**  
46  
47 **prevalence estimates with a precision of 5%. However, less precise estimates were permitted**  
48  
49 **by the study sample in Austria, Iceland and The Netherlands (precision of 9-11%), as well as**  
50  
51 **in Australia, Canada, Croatia, Serbia, Slovenia, and USA (precision of 6-7%).**  
52  
53  
54  
55  
56  
57  
58  
59  
60

1  
2  
3 One main limitation of the study is the lack of validity of the self-reported diagnoses. All  
4  
5 disorders were self-reported by the participants and hence dependent on the women's  
6  
7 perception of the medical condition. Similarly, information about medication use during  
8  
9 pregnancy was dependent on the accuracy of the women's reporting and recall. For new  
10  
11 mothers, data were registered retrospectively; hence a risk of recall bias cannot be ruled out.

12  
13  
14 In specific countries (Australia, Canada, France, Russia, The Netherlands, and the USA) the  
15  
16 study sample was a small proportion of the general birthing population; hence the  
17  
18 generalizability of our findings for these specific countries should be interpreted with caution.  
19

20  
21 The questionnaire was only available through internet websites; by using this kind of  
22  
23 approach a conventional response rate cannot be calculated and a selection bias of the target  
24  
25 population cannot be ruled out. However, recent epidemiological studies indicate reasonable  
26  
27 validity of web-based recruitment methods.[37,38] Also, the penetration rate of the internet  
28  
29 either in households or at work is relatively high among women in childbearing age.[39-43]  
30  
31 Hence, the degree to which our findings can be extrapolated to the target population is based  
32  
33 on the representativeness of the respondents to the general birthing populations in each  
34  
35 country. The sample in each country had a somewhat higher educational level than the general  
36  
37 birthing populations. Such a limitation might have led to biased estimates of the association  
38  
39 between maternal education and medication use during pregnancy. Since many ailments  
40  
41 requiring pharmacotherapy occur in mid or late pregnancy, inclusion of pregnant women at  
42  
43 early gestation in the total material has somewhat inflated the prevalence of non-users of  
44  
45 medications during pregnancy. Also, women with specific disorders or in need of information  
46  
47 about medication use during pregnancy might have been more likely to consult internet  
48  
49 websites and therefore participate in this study.  
50  
51  
52  
53  
54  
55  
56  
57  
58  
59  
60

## CONCLUSIONS

Use of medications for acute/short-term illnesses and chronic/long-term disorders as well as use of OTC medications, were common during pregnancy. The extent of medicated illnesses and types of medications used for the different indications varied across the six regions. This was especially relevant for acute/short-term illnesses such as nausea and UTIs, but also for chronic/long-term disorders such as hypothyroidism or depression. Women with higher age or lower educational level, housewives, or women with an unplanned pregnancy were those most often reporting use of chronic/long-term medication use, as opposed to i ~~and may therefore be more in need of information about medication during pregnancy. Moreover, maternal-fetal health among i~~immigrants residing in Western and Northern Europe who reported the least use of this medication category. might be jeopardized. Future research should definitely focus on this specific group of women, but also address more insights into the outcome of sub-optimal medication of severe conditions in pregnancy.



## ACKNOWLEDGMENTS

We thank OTIS, ENTIS Scientific Board who reviewed the study protocol and all website providers who contributed to the recruitment phase. We are grateful to all the participating women who took part in this study.

**AUTHOR'S CONTRIBUTION:** AL, OS and HN conceived the idea for the study and participated in its design and coordination. AL drafted the manuscript and analyzed the data. MJT, KZ, ACM, MEM, MD, AP, KHA, AR, RGJ, MO, DK, GR, HJ, AP and IB contributed to the data collection. All authors contributed to the interpretation of the results and revised the manuscript critically for important intellectual content. All the authors read and approved the final manuscript.

**DATA SHARING STATEMENT:** No additional data are available. Researchers can apply for data access for subprojects within the overall aims of the main study 'The Multinational Medication Use in Pregnancy Study'.

**REFERENCES**

1. ACOG Committee Opinion No. 377: Research involving women. *Obstet Gynecol* 2007;**110**(3):731-6.
2. Adam MP, Polifka JE, Friedman JM. Evolving knowledge of the teratogenicity of medications in human pregnancy. *Am J Med Genet C Semin Med Genet* 2011;**157**(3):175-82.
3. Briggs GG, Freeman RK, Yaffe SJ. *Drugs in pregnancy and lactation*. [S.l.]: Lippincott Williams & Wilkins 2011.
4. Mitchell AA, Gilboa SM, Werler MM, et al. Medication use during pregnancy, with particular focus on prescription drugs: 1976-2008. *Am J Obstet Gynecol* 2011;**205**(1):51 e1-8.
5. Odalovic M, Vezmar Kovacevic S, Ilic K, et al. Drug use before and during pregnancy in Serbia. *Int J Clin Pharm* 2012;**34**(5):719-27.
6. Gagne JJ, Maio V, Berghella V, et al. Prescription drug use during pregnancy: a population-based study in Regione Emilia-Romagna, Italy. *Eur J Clin Pharmacol* 2008;**64**(11):1125-32.
7. Engeland A, Bramness JG, Daltveit AK, et al. Prescription drug use among fathers and mothers before and during pregnancy. A population-based cohort study of 106,000 pregnancies in Norway 2004-2006. *Br J Clin Pharmacol* 2008;**65**(5):653-60.
8. Bakker MK, Jentink J, Vroom F, et al. Drug prescription patterns before, during and after pregnancy for chronic, occasional and pregnancy-related drugs in the Netherlands. *BJOG* 2006;**113**(5):559-68.
9. Lacroix I, Hurault C, Sarramon MF, et al. Prescription of drugs during pregnancy: a study using EFEMERIS, the new French database. *Eur J Clin Pharmacol* 2009;**65**(8):839-46.
10. Malm H, Martikainen J, Klaukka T, et al. Prescription drugs during pregnancy and lactation--a Finnish register-based study. *Eur J Clin Pharmacol* 2003;**59**(2):127-33.

11. Daw JR, Hanley GE, Greyson DL, et al. Prescription drug use during pregnancy in developed countries: a systematic review. *Pharmacoepidemiol Drug Saf* 2011;**20**(9):895-902.
12. Rubin JD, Ferencz C, Loffredo C. Use of prescription and non-prescription drugs in pregnancy. *J Clin Epidemiol* 1993;**46**(6):581-89.
13. McKenna L, McIntyre M. What over-the-counter preparations are pregnant women taking? A literature review. *J Adv Nurs* 2006;**56**(6):636-45.
14. Odalovic M, Vezmar Kovacevic S, Nordeng H, et al. Predictors of the use of medications before and during pregnancy. *Int J Clin Pharm* 2013;**35**(3):408-16.
15. Martindale W, Sweetman SC. *Martindale : the complete drug reference*. London: Pharmaceutical Press, 2011.
16. WHO Collaborating Centre for Drugs Statistics Methodology. Guidelines for ATC classification and DDD assignment 2013. Oslo, 2012. Available at: [http://www.whocc.no/atc\\_ddd\\_index/](http://www.whocc.no/atc_ddd_index/). Accessed 17 March, 2012.
17. Refuerzo JS, Blackwell SC, Sokol RJ, et al. Use of Over-the-Counter Medications and Herbal Remedies in Pregnancy. *Amer J Perinatol* 2005;**22**(EFirst):321,24.
18. Sawicki E, Stewart K, Wong S, et al. Medication use for chronic health conditions by pregnant women attending an Australian maternity hospital. *Aust N Z J Obstet Gynaecol* 2011;**51**(4):333-38.
19. Hosmer DW, Lemeshow S. *Applied logistic regression*. New York: Wiley-Interscience 2000.
20. Nordeng H, Ystrøm E, Einarson A. Perception of risk regarding the use of medications and other exposures during pregnancy. *Eur J Clin Pharmacol* 2010;**66**(2):207-14.
21. Headley J, Northstone K, Simmons H, et al. Medication use during pregnancy: data from the Avon Longitudinal Study of Parents and Children. *Eur J Clin Pharmacol* 2004;**60**(5):355-61.

- 1  
2  
3 22. Medication during pregnancy: an intercontinental cooperative study. Collaborative Group  
4 on Drug Use in Pregnancy (C.G.D.U.P.). *Int J Gynaecol Obstet* 1992;**39**(3):185-96.  
5  
6  
7 23. Donati S, Baglio G, Spinelli A, et al. Drug use in pregnancy among Italian women. *Eur J*  
8  
9 *Clin Pharmacol* 2000;**56**(4):323-8.  
10  
11 24. Henry A, Crowther C. Patterns of medication use during and prior to pregnancy: the MAP  
12 study. *Aust N Z J Obstet Gynaecol* 2000;**40**(2):165-72.  
13  
14 25. Marín G, Cañas M, Homar C, et al. Uso de fármacos durante el período de gestación en  
15 embarazadas de Buenos Aires, Argentina. *Rev salud pública* 2010;**12**(5):722-31.  
16  
17 26. European Centre for Disease Prevention and Control. Surveillance of antimicrobial  
18 consumption in Europe, 2010. Stockholm: ECDC, 2013.  
19  
20 27. Smith J, Refuerzo J, Ramin S. Treatment and outcome of nausea and vomiting of  
21 pregnancy. In: Basow D, ed. UpToDate. Waltham, MA: UpToDate, 2013.  
22  
23 28. Gadsby R, Barnie-Adshead T, Sykes C. Why won't doctors prescribe antiemetics in  
24 pregnancy? *BMJ* 2011;**343**:d4387.  
25  
26 29. Raymond SH. A survey of prescribing for the management of nausea and vomiting in  
27 pregnancy in Australasia. *Aust N Z J Obstet Gynaecol* 2013.  
28  
29 30. Ross DS. Hypothyroidism during pregnancy: Clinical manifestations, diagnosis, and  
30 treatment. In: Basow DS, ed. UpToDate. Waltham, MA: UpToDate, 2013.  
31  
32 31. Lewis AJ, Bailey C, Galbally M. Anti-depressant use during pregnancy in Australia:  
33 findings from the Longitudinal Study of Australian Children. *Aust N Z J Public Health*  
34 2012;**36**(5):487-8.  
35  
36 32. Petersen I, Gilbert RE, Evans SJ, et al. Pregnancy as a major determinant for  
37 discontinuation of antidepressants: an analysis of data from The Health Improvement  
38 Network. *J Clin Psychiatry* 2011;**72**(7):979-85.  
39  
40  
41  
42  
43  
44  
45  
46  
47  
48  
49  
50  
51  
52  
53  
54  
55  
56  
57  
58  
59  
60

- 1  
2  
3 33. Cleary BJ, Butt H, Strawbridge JD, et al. Medication use in early pregnancy-prevalence  
4 and determinants of use in a prospective cohort of women. *Pharmacoepidemiol Drug Saf*  
5 2010;**19**(4):408-17.  
6  
7  
8  
9  
10 34. Olesen C, Thrane N, Henriksen TB, et al. Associations between socio-economic factors  
11 and the use of prescription medication during pregnancy: a population-based study among  
12 19,874 Danish women. *Eur J Clin Pharmacol* 2006;**62**(7):547-53.  
13  
14  
15 35. Stokholm J, Schjorring S, Pedersen L, et al. Prevalence and Predictors of Antibiotic  
16 Administration during Pregnancy and Birth. *PLoS One* 2013;**8**(12):e82932.  
17  
18  
19  
20 36. Hameen-Anttila K, Jyrkka J, Enlund H, et al. Medicines information needs during  
21 pregnancy: a multinational comparison. *BMJ Open* 2013;**3**(4).  
22  
23  
24 37. Ekman A, Dickman P, Klint Å, et al. Feasibility of Using Web-based Questionnaires in  
25 Large Population-based Epidemiological Studies. *Eur J Epidemiol* 2006;**21**(2):103-11.  
26  
27  
28  
29 38. van Gelder MM, Bretveld RW, Roeleveld N. Web-based questionnaires: the future in  
30 epidemiology? *Am J Epidemiol* 2010;**172**(11):1292-8.  
31  
32  
33  
34 39. Seybert H. Internet use in households and by individuals in 2011. Eurostat Statistics in  
35 focus. 2011; Available at: [http://epp.eurostat.ec.europa.eu/cache/ITY\\_OFFPUB/KS-SF-11-](http://epp.eurostat.ec.europa.eu/cache/ITY_OFFPUB/KS-SF-11-066/EN/KS-SF-11-066-EN.PDF)  
36 [066/EN/KS-SF-11-066-EN.PDF](http://epp.eurostat.ec.europa.eu/cache/ITY_OFFPUB/KS-SF-11-066/EN/KS-SF-11-066-EN.PDF). Accessed 13 November, 2012.  
37  
38  
39  
40 40. Internet World Stats. Usage and population statistics. 2012; Available at:  
41 <http://www.internetworldstats.com/>. Accessed 13 November, 2012.  
42  
43  
44  
45 41. Australian Bureau of Statistics. Household Use of Information Technology, Australia,  
46 2010-11. Available at: [http://www.abs.gov.au/ausstats/abs@.nsf/Latestproducts/8146.0Main](http://www.abs.gov.au/ausstats/abs@.nsf/Latestproducts/8146.0MainFeatures12010-11?opendocument&tabname=Summary&prodno=8146.0&issue=2010-11&num=&view=)  
47 [Features12010-11?opendocument&tabname=Summary&prodno=8146.0&issue=2010-](http://www.abs.gov.au/ausstats/abs@.nsf/Latestproducts/8146.0MainFeatures12010-11?opendocument&tabname=Summary&prodno=8146.0&issue=2010-11&num=&view=)  
48 [11&num=&view=](http://www.abs.gov.au/ausstats/abs@.nsf/Latestproducts/8146.0MainFeatures12010-11?opendocument&tabname=Summary&prodno=8146.0&issue=2010-11&num=&view=). Accessed 13 November, 2012.  
49  
50  
51  
52  
53  
54  
55  
56  
57  
58  
59  
60

1  
2  
3 42. Statistics Canada. Individual Internet use and E-commerce (2010). 2011; Available at:  
4  
5 <http://www.statcan.gc.ca/daily-quotidien/111012/dq111012a-eng.htm>. Accessed 13  
6  
7 November, 2012.

8  
9 43. United States Census Bureau. The 2012 Statistical Abstract. Information &  
10  
11 Communications: Internet Publishing and Broadcasting and Internet Usage. 2010; Available  
12  
13 at:  
14  
15 [http://www.census.gov/compendia/statab/cats/information\\_communications/internet\\_publishing\\_and\\_broadcasting\\_and\\_internet\\_usage.html](http://www.census.gov/compendia/statab/cats/information_communications/internet_publishing_and_broadcasting_and_internet_usage.html). Accessed 13 November, 2012.  
16  
17  
18  
19  
20  
21  
22  
23  
24  
25  
26  
27  
28  
29  
30  
31  
32  
33  
34  
35  
36  
37  
38  
39  
40  
41  
42  
43  
44  
45  
46  
47  
48  
49  
50  
51  
52  
53  
54  
55  
56  
57  
58  
59  
60

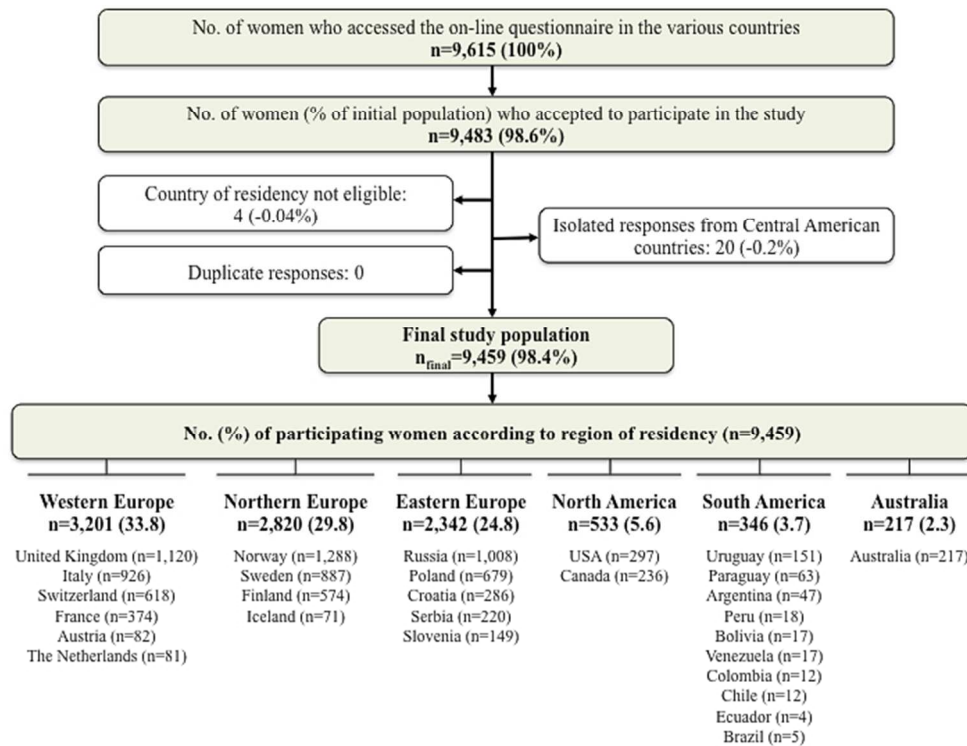

Figure 1 shows the participant flow-chart to achieve the final sample analyzed 60x45mm (300 x 300 DPI)

Review only

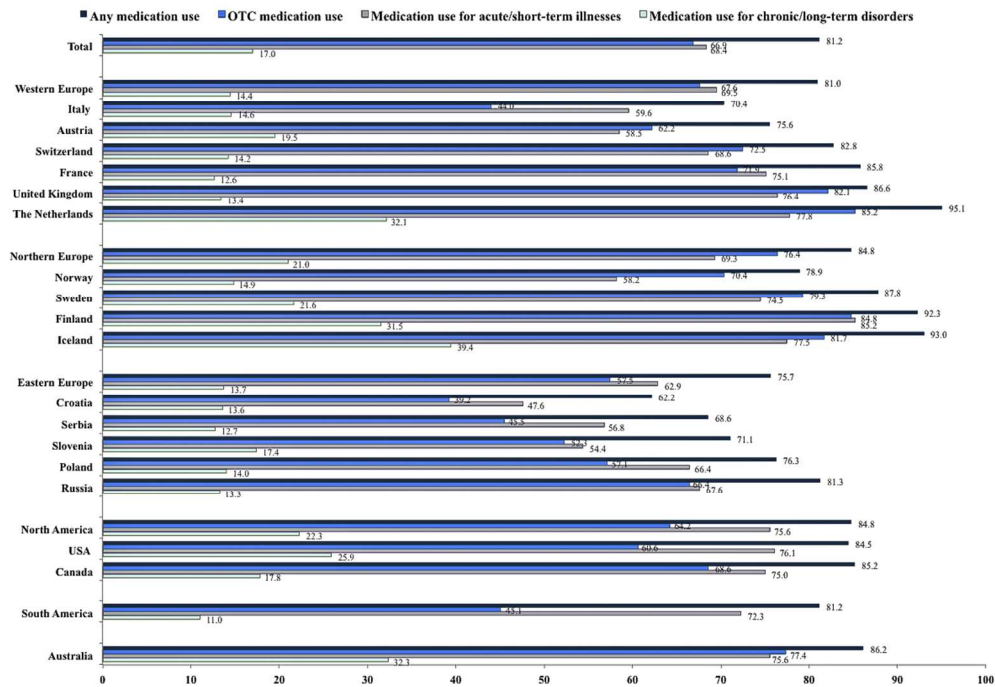

Figure 2 shows the proportion of respondents (%) reporting use of any medication, over-the-counter (OTC) medication, medication for acute/short-term illnesses and medication for chronic/long-term disorders during pregnancy according to region and country of residency. The observed estimates do not include vitamins, mineral supplements, iron, and herbal or alternative medicine products.  
100x69mm (300 x 300 DPI)



1  
2  
3  
4  
5  
6  
7  
8  
9  
10  
11  
12  
13  
14  
15  
16  
17  
18  
19  
20  
21  
22  
23  
24  
25  
26  
27  
28  
29  
30  
31  
32  
33  
34  
35  
36  
37  
38  
39  
40  
41  
42  
43  
44  
45  
46  
47  
48  
49  
50  
51  
52  
53  
54  
55  
56  
57  
58  
59  
60

Appendix 1: Survey questionnaire

***Internet questionnaire***

***Medication use in pregnancy with focus on attitudes,  
perception of risk and mental health***

***The Multinational Medication Use in Pregnancy Study***

---

## INFORMATION ABOUT YOURSELF

|                                                                                                                                                                                                                                                                                                                                                                                 |                                                                                                                                     |
|---------------------------------------------------------------------------------------------------------------------------------------------------------------------------------------------------------------------------------------------------------------------------------------------------------------------------------------------------------------------------------|-------------------------------------------------------------------------------------------------------------------------------------|
| <b>1. In which country do you live?</b><br><b>Country:</b> _____                                                                                                                                                                                                                                                                                                                | <b>In which region/province do you live?</b><br><b>Region:</b> _____                                                                |
| <b>2. Are you pregnant right now?</b><br><input type="checkbox"/> Yes                                                                                                                                                                                                                                                                                                           |                                                                                                                                     |
| <input type="checkbox"/> No                                                                                                                                                                                                                                                                                                                                                     |                                                                                                                                     |
| <b>(If yes in Q2) In which pregnancy week are you?</b><br><b>From 1 to 44</b>                                                                                                                                                                                                                                                                                                   | <b>(If No in Q2) How old is your newborn child (in weeks)?</b><br><b>0-4 / 5-8 / 9-12 / 13-16 / 17-20 / 21-24 / 25-28 / &gt; 29</b> |
| <b>(If yes in Q2) Is it a multiple pregnancy?</b><br><input type="checkbox"/> No<br><input type="checkbox"/> Yes (e.g. twins, triplets, etc)                                                                                                                                                                                                                                    | <b>(If No in Q2) Do you breast feed your child?</b><br><input type="checkbox"/> Yes<br><input type="checkbox"/> No                  |
| <b>3. How many children do you already have from before?</b><br><input type="checkbox"/> None<br><input type="checkbox"/> One<br><input type="checkbox"/> Two<br><input type="checkbox"/> More than two                                                                                                                                                                         |                                                                                                                                     |
| <b>4. What is your marital status?</b><br><input type="checkbox"/> Married<br><input type="checkbox"/> Cohabitant<br><input type="checkbox"/> Single<br><input type="checkbox"/> Divorced/Separated<br><input type="checkbox"/> Other                                                                                                                                           |                                                                                                                                     |
| <b>5. What is the highest education you have completed?</b><br><input type="checkbox"/> Primary school (8-9 years of education)<br><input type="checkbox"/> High-school (11-13 years of education)<br><input type="checkbox"/> University<br><input type="checkbox"/> Other education                                                                                           |                                                                                                                                     |
| <b>6. What was your work situation when you became pregnant?</b><br><input type="checkbox"/> Student<br><input type="checkbox"/> Housewife<br><input type="checkbox"/> Health care personnel, i.e., physician, nurse, or pharmacist<br><input type="checkbox"/> Employed in another sector<br><input type="checkbox"/> Job seeker<br><input type="checkbox"/> None of the above |                                                                                                                                     |
| <b>7. Is English your mother tongue?</b><br><input type="checkbox"/> Yes<br><input type="checkbox"/> No                                                                                                                                                                                                                                                                         |                                                                                                                                     |
| <b>(If No in Q7 above) What is your mother tongue?</b> _____                                                                                                                                                                                                                                                                                                                    |                                                                                                                                     |
| <b>8. Your age: Years, from 15 to 55</b>                                                                                                                                                                                                                                                                                                                                        |                                                                                                                                     |

## INFORMATION ABOUT YOUR PREGNANCY

9. **(If pregnant)** Are you attending any pregnancy/birth preparation course or similar?

- Yes  
 No, but I am planning to attend  
 No, I am not going to attend it

10. **(If pregnant)** What are your thoughts about how the experience of giving birth is going to be?

Please indicate your thoughts in a scale from 1 to 6, where **1 corresponds to absolutely terrible and 6 to absolutely fantastic**

|                     |                          |                          |                          |                          |                          |                          |                      |
|---------------------|--------------------------|--------------------------|--------------------------|--------------------------|--------------------------|--------------------------|----------------------|
| Absolutely terrible | 1                        | 2                        | 3                        | 4                        | 5                        | 6                        | Absolutely fantastic |
|                     | <input type="checkbox"/> |                      |

11. Was your pregnancy planned?

- Yes  
 No, but it was not completely unexpected  
 No, it was not planned

12. Did you contact any healthcare provider due to infertility?

- Yes  
 No

**(If Yes in Q12 above)** Did you, in this pregnancy, become pregnant secondarily to infertility treatment?

- Yes  
 No

13. Have you taken folic acid? (alone or as part of multivitamins)

- Yes, before pregnancy  
 Yes, before and during pregnancy  
 Yes, only during pregnancy  
 No  
 cannot remember

14. Did you smoke cigarettes before becoming pregnant?

- Yes, regularly  
 Yes, occasionally  
 No, never

**(If yes in Q14 as regularly/occasionally)** Do you/did you smoke during pregnancy?

- Yes, more than before  
 Yes, approximately the same  
 Yes, but less  
 No

**(If yes)** How many cigarettes (on average) do you/did you smoke per day?

- < 1  
 1-5  
 6-10  
 > 11

15. Did you drink any alcohol after finding out that you were pregnant?

- Yes  
 No  
 Cannot remember

**(If yes) How much did you drink (in units)?**

1 alcohol unit is equivalent to:

one 25ml single measure of whisky (ABV 40%),

or a third of a pint of beer (ABV 5-6%)

or half a standard (175ml) glass of red wine (ABV 12%).

- More than 1-2 units per week
- 1-2 units per week
- 1-4 units per month
- 1-2 units during the pregnancy
- Can not remember

For peer review only

## HEALTH DISORDERS AND MEDICATIONS DURING PREGNANCY

**16. Have you experienced any of the disorders listed below during this pregnancy?  
If you use or have used any medicines in relation to [each health disorder listed]  
please enter the names of the medicines.  
In which weeks of pregnancy have you used them?**

| <b>Health disorder</b>                                                                               | <b>Medicine</b>                                                                                                                                      | <b>Period of use<br/>(pregnancy weeks)</b>                                                                              |
|------------------------------------------------------------------------------------------------------|------------------------------------------------------------------------------------------------------------------------------------------------------|-------------------------------------------------------------------------------------------------------------------------|
| Nausea<br><input type="checkbox"/> Yes<br><input type="checkbox"/> No                                | (If Nausea ticked) If you use or have used any medicines in relation to nausea, please enter the names of the medicines                              | <input type="checkbox"/> week 0-12<br><input type="checkbox"/> week 13-24<br><input type="checkbox"/> week 25- delivery |
| Heartburn or reflux problems<br><input type="checkbox"/> Yes<br><input type="checkbox"/> No          | (If Heartburn ticked) If you use or have used any medicines in relation to heartburn or reflux problem, please enter the names of the medicines      | <input type="checkbox"/> week 0-12<br><input type="checkbox"/> week 13-24<br><input type="checkbox"/> week 25- delivery |
| Constipation<br><input type="checkbox"/> Yes<br><input type="checkbox"/> No                          | (If Constipation ticked) If you use or have used any medicines in relation to constipation, please enter the names of the medicines                  | <input type="checkbox"/> week 0-12<br><input type="checkbox"/> week 13-24<br><input type="checkbox"/> week 25- delivery |
| Common cold<br><input type="checkbox"/> Yes<br><input type="checkbox"/> No                           | (If common cold ticked) If you use or have used any medicines in relation to common cold, please enter the names of the medicines                    | <input type="checkbox"/> week 0-12<br><input type="checkbox"/> week 13-24<br><input type="checkbox"/> week 25- delivery |
| Urinary tract infections<br><input type="checkbox"/> Yes<br><input type="checkbox"/> No              | (If UTI ticked) If you use or have used any medicines in relation to urinary tract infections, please enter the names of the medicines               | <input type="checkbox"/> week 0-12<br><input type="checkbox"/> week 13-24<br><input type="checkbox"/> week 25- delivery |
| Other infections<br><input type="checkbox"/> Yes<br><input type="checkbox"/> No                      | (If other infections ticked) If you use or have used any medicines in relation to other infections, please enter the names of the medicines          | <input type="checkbox"/> week 0-12<br><input type="checkbox"/> week 13-24<br><input type="checkbox"/> week 25- delivery |
| Pain in neck or back or pelvic girdle<br><input type="checkbox"/> Yes<br><input type="checkbox"/> No | (If pain ticked) If you use or have used any medicines in relation to pain in neck or back or pelvic girdle, please enter the names of the medicines | <input type="checkbox"/> week 0-12<br><input type="checkbox"/> week 13-24<br><input type="checkbox"/> week 25- delivery |
| Headache<br><input type="checkbox"/> Yes<br><input type="checkbox"/> No                              | (If headache ticked) If you use or have used any medicines in relation to headache, please enter the names of the medicines                          | <input type="checkbox"/> week 0-12<br><input type="checkbox"/> week 13-24<br><input type="checkbox"/> week 25- delivery |
| Sleeping problems<br><input type="checkbox"/> Yes<br><input type="checkbox"/> No                     | (If sleeping problems ticked) If you use or have used any medicines in relation to sleeping problems, please enter the names of the medicines        | <input type="checkbox"/> week 0-12<br><input type="checkbox"/> week 13-24<br><input type="checkbox"/> week 25- delivery |

1  
2  
3  
4  
5  
6  
7  
8  
9  
10  
11  
12  
13  
14  
15  
16  
17  
18  
19  
20  
21  
22  
23  
24  
25  
26  
27  
28  
29  
30  
31  
32  
33  
34  
35  
36  
37  
38  
39  
40  
41  
42  
43  
44  
45  
46  
47  
48  
49  
50  
51  
52  
53  
54  
55  
56  
57  
58  
59  
60

17. Have you been on sick leave during this pregnancy?

Yes

No

18. (If yes in Q17) What was the reason for it? In which pregnancy weeks have you been on sick leave?

Reason of the sick leave

Sick leave period  
(pregnancy week)

- week 0-12  
 week 13-24  
 week 25-delivery

19. Below, some common over-the-counter (OTC) medicines are mentioned.  
Please indicate whether you have used any of them during pregnancy.

Please enter the name of all X medicines you have used.  
In which pregnancy weeks have you used them?

|                                                                                                               |                                                             | Name of the medicine(s) you have used                                                                                             | Period of use<br>(pregnancy week)                                                                                       |
|---------------------------------------------------------------------------------------------------------------|-------------------------------------------------------------|-----------------------------------------------------------------------------------------------------------------------------------|-------------------------------------------------------------------------------------------------------------------------|
| Pain killers<br>(e.g. paracetamol)                                                                            | <input type="checkbox"/> Yes<br><input type="checkbox"/> No | (If painkillers ticked)<br>Please enter the name of all pain killers you have used during pregnancy.                              | <input type="checkbox"/> week 0-12<br><input type="checkbox"/> week 13-24<br><input type="checkbox"/> week 25- delivery |
| Nasal spray/drops<br>(excluding salt water solution)<br>(e.g. Otrivine, Vicks Sinex decongestant Nasal spray) | <input type="checkbox"/> Yes<br><input type="checkbox"/> No | (If nasal spray ticked)<br>Please enter the name of all nasal sprays/drops you have used during pregnancy.                        | <input type="checkbox"/> week 0-12<br><input type="checkbox"/> week 13-24<br><input type="checkbox"/> week 25- delivery |
| Medication against heartburn<br>(e.g. Gaviscon or Rennie)                                                     | <input type="checkbox"/> Yes<br><input type="checkbox"/> No | (If OTC for heartburn ticked)<br>Please enter the name of all medications you have used against heartburn during pregnancy.       | <input type="checkbox"/> week 0-12<br><input type="checkbox"/> week 13-24<br><input type="checkbox"/> week 25- delivery |
| Medication against nausea/travel sickness (e.g. Cetirizine, Sea-Legs)                                         | <input type="checkbox"/> Yes<br><input type="checkbox"/> No | (If OTC for nausea ticked)<br>Please enter the name of all medications you have used against nausea during pregnancy.             | <input type="checkbox"/> week 0-12<br><input type="checkbox"/> week 13-24<br><input type="checkbox"/> week 25- delivery |
| Medication against constipation<br>(e.g. Lactulose, Dulcolax)                                                 | <input type="checkbox"/> Yes<br><input type="checkbox"/> No | (If OTC for constipation ticked)<br>Please enter the name of all medications you have used against constipation during pregnancy. | <input type="checkbox"/> week 0-12<br><input type="checkbox"/> week 13-24<br><input type="checkbox"/> week 25- delivery |

20. Did you take any herbal preparations during pregnancy (e.g. ginger, echinacea, valerian, cranberries)?

- Yes  No  Cannot remember

(If yes) Please provide the name of all herbal preparations you have taken during pregnancy.

(If yes) What was the reason for taking herbal preparations (health disorder, illness)?

(If yes) In which pregnancy weeks did you take herbal preparations?

| Name of herbal preparation used        | Reason for use (health disorder, illness) | Period of use (pregnancy week)                                                                                                         |
|----------------------------------------|-------------------------------------------|----------------------------------------------------------------------------------------------------------------------------------------|
| <p>_____</p> <p>_____</p> <p>_____</p> | <p>_____</p> <p>_____</p> <p>_____</p>    | <p><input type="checkbox"/> week 0-12</p> <p><input type="checkbox"/> week 13-24</p> <p><input type="checkbox"/> week 25- delivery</p> |
| <p>_____</p> <p>_____</p> <p>_____</p> | <p>_____</p> <p>_____</p> <p>_____</p>    | <p><input type="checkbox"/> week 0-12</p> <p><input type="checkbox"/> week 13-24</p> <p><input type="checkbox"/> week 25- delivery</p> |

21. (If you used herbal preparations during pregnancy) Who recommended to you to take herbal preparations during pregnancy? (You may tick more than one answer)

- My own initiative
- Family/friends
- Physician
- Midwife/Nurse
- Pharmacy personnel
- Herbal shop personnel
- Internet
- Magazines, media, etc.
- Other (please specify: \_\_\_\_\_)

22. Did you use homeopathic products during pregnancy?

- Yes  No  Cannot remember

(If yes in Q22 above) What was the reason for use?

\_\_\_\_\_

For peer review only

**A BIT MORE ABOUT MEDICATION USE DURING PREGNANCY**

23. Have you deliberately avoided taking an over-the-counter medicine during your pregnancy?

Yes

No

Cannot remember

(If yes in Q23 above) Which medicine was it?

---

(If yes in Q23 above) What was the reason for doing so?

---

---

24. Have you deliberately chosen not to use a medicine prescribed by a doctor because you were pregnant?

Yes

No

Can not remember

(If yes in Q24 above) Which medicine was it?

---

(If yes in Q24 above) What was the reason for doing so?

---

---

For peer review only



## YOUR NEEDS FOR INFORMATION

1  
2  
3  
4  
5  
6  
7  
8  
9  
10  
11  
12  
13  
14  
15  
16  
17  
18  
19  
20  
21  
22  
23  
24  
25  
26  
27  
28  
29  
30  
31  
32  
33  
34  
35  
36  
37  
38  
39  
40  
41  
42  
43  
44  
45  
46  
47  
48  
49  
50  
51  
52  
53  
54  
55  
56  
57  
58  
59  
60

25. Did you need information about medicines during the course of your pregnancy?

- Yes  No  Cannot remember

26. (If yes in Q25) Whom did you turn to for information? (You may tick more than one answer)

- Family/friends  
 Physician  
 Midwife/Nurse  
 Pharmacy personnel  
 Herbal shop personnel  
 Drug formulary/information leaflet  
 Poison information centre  
 Teratology information service  
 National center of information on medicines  
 Internet  
 Magazines, media, etc  
 Other (please specify: \_\_\_\_\_)

27. (if yes in Q25) If you have obtained information from various sources, was such information similar?

- Yes, completely similar  
 Yes, as a whole (only the wording or detail level was somewhat different)  
 No, part of the information was different  
 No, the information was completely contradictory

28. (If No – last 2 options in Q27) If there were discrepancies among the sources, what did it mean to you? (You may tick more than one answer)

- Nothing  
 I became anxious  
 I decided not to use the medication  
 I sought for a new information source (Which new source have you consulted?  
 \_\_\_\_\_)  
 I chose to rely on one source and ignore the conflicting one (On which source have you  
 relied? \_\_\_\_\_ Which source have you ignored? \_\_\_\_\_)

29. How often do you have someone help you read hospital materials?

- Always  
 Often  
 Sometimes  
 Occasionally  
 Never

30. How confident are you filling out medical forms by yourself?

- Extremely  
 Quite a bit  
 Somewhat  
 A little bit  
 Not at all

31. How often do you have problems learning about your medical condition because of difficulty understanding written information?

- Always  
 Often  
 Sometimes  
 Occasionally  
 Never

The following section will pop-up only if the subject has reported to be suffering from a chronic disease

## I. MEDICATIONS FOR CHRONIC DISEASES DURING PREGNANCY

If you use or have used medicines for a chronic disease during your pregnancy fill out this part of the questionnaire (I, II, III) and provide some information about those medicines you use daily.

*Some chronic diseases are asthma, allergy, hypothyroidism (low thyroid hormone), rheumatic diseases (incl. rheumatoid arthritis, psoriatic arthritis), diabetes (type I or II), epilepsy, depression, anxiety, cardiovascular diseases (incl. hypertension, high cholesterol, and heart diseases)*

Do you suffer of any chronic disease?  Yes  No

(If Yes above) Please indicate whether you suffer of any of the following chronic diseases.

|                                                                       |                                                             | If you use or have used medicines for X during your pregnancy, please enter the name of the medicines.                                              | In which weeks of pregnancy did you use them?                                                                          |
|-----------------------------------------------------------------------|-------------------------------------------------------------|-----------------------------------------------------------------------------------------------------------------------------------------------------|------------------------------------------------------------------------------------------------------------------------|
| Asthma                                                                | <input type="checkbox"/> Yes<br><input type="checkbox"/> No | (If Asthma ticked) If you use or have used medicines for asthma during pregnancy, please enter the names of the medicines.                          | <input type="checkbox"/> week 0-12<br><input type="checkbox"/> week 13-24<br><input type="checkbox"/> week 25-delivery |
| Allergy                                                               | <input type="checkbox"/> Yes<br><input type="checkbox"/> No | (If Allergy ticked) If you use or have used medicines for allergy during pregnancy, please enter the names of the medicines.                        | <input type="checkbox"/> week 0-12<br><input type="checkbox"/> week 13-24<br><input type="checkbox"/> week 25-delivery |
| Hypothyroidism (low thyroid hormone)                                  | <input type="checkbox"/> Yes<br><input type="checkbox"/> No | (If Hypothyroidism ticked) If you use or have used medicines for hypothyroidism during pregnancy, please enter the names of the medicines.          | <input type="checkbox"/> week 0-12<br><input type="checkbox"/> week 13-24<br><input type="checkbox"/> week 25-delivery |
| Rheumatic disorders (incl. rheumatoid arthritis, psoriatic arthritis) | <input type="checkbox"/> Yes<br><input type="checkbox"/> No | (If Rheumatic disorders ticked) If you use or have used medicines for rheumatic disorder during pregnancy, please enter the names of the medicines. | <input type="checkbox"/> week 0-12<br><input type="checkbox"/> week 13-24<br><input type="checkbox"/> week 25-delivery |
| Diabetes (type I or II)                                               | <input type="checkbox"/> Yes<br><input type="checkbox"/> No | (If Diabetes ticked) If you use or have used medicines for diabetes during pregnancy, please enter the names of the medicines.                      | <input type="checkbox"/> week 0-12<br><input type="checkbox"/> week 13-24<br><input type="checkbox"/> week 25-delivery |
| Epilepsy                                                              | <input type="checkbox"/> Yes<br><input type="checkbox"/> No | (If Epilepsy ticked) If you use or have used medicines for epilepsy during pregnancy, please enter the names of the medicines.                      | <input type="checkbox"/> week 0-12<br><input type="checkbox"/> week 13-24<br><input type="checkbox"/> week 25-delivery |
| Depression                                                            | <input type="checkbox"/> Yes<br><input type="checkbox"/> No | (If Depression ticked) If you use or have used medicines for depression, please enter the names of the medicines.                                   | <input type="checkbox"/> week 0-12<br><input type="checkbox"/> week 13-24<br><input type="checkbox"/> week 25-delivery |
| Anxiety                                                               | <input type="checkbox"/> Yes<br><input type="checkbox"/> No | (If Anxiety ticked) If you use or have used medicines for anxiety during pregnancy, please enter the names of the medicines.                        | <input type="checkbox"/> week 0-12<br><input type="checkbox"/> week 13-24<br><input type="checkbox"/> week 25-delivery |

|                                                                                             |                                                                     | <p><b>If you use or have used medicines for X during your pregnancy, please enter the name of the medicines.</b></p>                                       | <p><b>In which weeks of pregnancy did you use them?</b></p>                                                                     |
|---------------------------------------------------------------------------------------------|---------------------------------------------------------------------|------------------------------------------------------------------------------------------------------------------------------------------------------------|---------------------------------------------------------------------------------------------------------------------------------|
| <p>Cardiovascular diseases (incl. hypertension, high cholesterol, heart diseases)</p>       | <p><input type="checkbox"/> Yes<br/><input type="checkbox"/> No</p> | <p>(If Cardio disease ticked) If you use or have used medicines for cardiovascular diseases during pregnancy, please enter the names of the medicines.</p> | <p><input type="checkbox"/> week 0-12<br/><input type="checkbox"/> week 13-24<br/><input type="checkbox"/> week 25-delivery</p> |
| <p>Others<br/>(If Others ticked)<br/>(Please specify which other disease(s):<br/>_____)</p> | <p><input type="checkbox"/> Yes<br/><input type="checkbox"/> No</p> | <p>(If Other disease ticked) If you use or have used medicines for your chronic disease during pregnancy, please enter the names of the medicines.</p>     | <p><input type="checkbox"/> week 0-12<br/><input type="checkbox"/> week 13-24<br/><input type="checkbox"/> week 25-delivery</p> |

For peer review only

1  
2  
3  
4  
5  
6  
7  
8  
9  
10  
11  
12  
13  
14  
15  
16  
17  
18  
19  
20  
21  
22  
23  
24  
25  
26  
27  
28  
29  
30  
31  
32  
33  
34  
35  
36  
37  
38  
39  
40  
41  
42  
43  
44  
45  
46  
47  
48  
49  
50  
51  
52  
53  
54  
55  
56  
57  
58  
59  
60

Section II will pop-up only if the subject has reported to be suffering of a chronic disease

## II. YOUR VIEWS ABOUT PRESCRIBED MEDICINES

In this section of the survey questionnaire, the **Belief About Prescribed Medicine Questionnaire (BMQ-Specific)** was presented (Horne R, Weinman J, Hankins M. The beliefs about medicines questionnaire: The development and evaluation of a new method for assessing the cognitive representation of medication. Psychol Health. 1999;14(1):1-24).

For peer review only

1 Section III will pop-up only if the subject has reported to be suffering of a chronic disease.  
2 There will be one single scale for each chronic condition reported  
3  
4

5 **III. QUESTION ABOUT YOUR USE OF MEDICATIONS FOR X**  
6 **DURING PREGNANCY AND/OR POSTPARTUM**  
7

8  
9  
10 In this section of the survey questionnaire, the **8-item Morisky Medication Adherence**  
11 **Questionnaire (MMAS-8)** was presented (*Morisky DE, Green LW, Levine DM. Concurrent*  
12 *and predictive validity of a self-reported measure of medication adherence. Medical care.*  
13 *1986;24(1):67-74*).  
14  
15  
16  
17  
18  
19  
20  
21  
22  
23  
24  
25  
26  
27  
28  
29  
30  
31  
32  
33  
34  
35  
36  
37  
38  
39  
40  
41  
42  
43  
44  
45  
46  
47  
48  
49  
50  
51  
52  
53  
54  
55  
56  
57  
58  
59  
60

For peer review only

1  
2  
3  
4  
5  
6  
7  
8  
9  
10  
11  
12  
13  
14  
15  
16  
17  
18  
19  
20  
21  
22  
23  
24  
25  
26  
27  
28  
29  
30  
31  
32  
33  
34  
35  
36  
37  
38  
39  
40  
41  
42  
43  
44  
45  
46  
47  
48  
49  
50  
51  
52  
53  
54  
55  
56  
57  
58  
59  
60

**Do you have any other comments about your medication use during pregnancy?**

---

---

---

---

---

For peer review only

## YOUR VIEWS ABOUT MEDICATIONS

In this section of the survey questionnaire, the **Belief About Medicine Questionnaire (BMQ-General)** was presented (*Horne R, Weinman J, Hankins M. The beliefs about medicines questionnaire: The development and evaluation of a new method for assessing the cognitive representation of medication. Psychol Health. 1999;14(1):1-24*).

For peer review only

1  
2  
3  
4  
5  
6  
7  
8  
9  
10  
11  
12  
13  
14  
15  
16  
17  
18  
19  
20  
21  
22  
23  
24  
25  
26  
27  
28  
29  
30  
31  
32  
33  
34  
35  
36  
37  
38  
39  
40  
41  
42  
43  
44  
45  
46  
47  
48  
49  
50  
51  
52  
53  
54  
55  
56  
57  
58  
59  
60

**32. Below are some statements about use of medicines in pregnancy.**

**Please specify how much you agree or disagree with these statements by ticking where appropriate. (You may only tick once per line)**

|                                                                                                                 | <b>Strongly agree</b> | <b>Agree</b>          | <b>Uncertain</b>      | <b>Disagree</b>       | <b>Strongly disagree</b> |
|-----------------------------------------------------------------------------------------------------------------|-----------------------|-----------------------|-----------------------|-----------------------|--------------------------|
| I have a higher threshold for using medicines when I am pregnant than when I'm not pregnant                     | <input type="radio"/>    |
| Even though I am ill and could have taken medicines, it is better for the foetus that I refrain from using them | <input type="radio"/>    |
| Pregnant women should preferably use herbal remedies than conventional medicines                                | <input type="radio"/>    |

For peer review only



## YOUR ASSESSMENT OF PREGNANCY RISKS

**33. Among 100 healthy women in a healthy environment, how many do you think will give birth to a child with a birth defect?**

**34. Here below is a list with various medicines, food and other substances.**

Please indicate how harmful you think they are for the foetus in a scale from 0 to 10, where 0 corresponds to 'not harmful' and 10 to 'very harmful'.

If you have not heard before about such substance, tick 'unknown substance'.

|                                                            | Unknown substance        | 0                        | 1                        | 2                        | 3                        | 4                        | 5                        | 6                        | 7                        | 8                        | 9                        | 10                       |
|------------------------------------------------------------|--------------------------|--------------------------|--------------------------|--------------------------|--------------------------|--------------------------|--------------------------|--------------------------|--------------------------|--------------------------|--------------------------|--------------------------|
| Paracetamol/acetaminophen                                  | <input type="checkbox"/> |
| Antibiotics (e.g. Penicillins)                             | <input type="checkbox"/> |
| Antidepressants                                            | <input type="checkbox"/> |
| Thalidomide                                                | <input type="checkbox"/> |
| Swine influenza vaccine                                    | <input type="checkbox"/> |
| OTC medicines against nausea/travel sickness               | <input type="checkbox"/> |
| Ginger                                                     | <input type="checkbox"/> |
| Cranberries                                                | <input type="checkbox"/> |
| Blue veined cheese (e.g. Gorgonzola)                       | <input type="checkbox"/> |
| Eggs                                                       | <input type="checkbox"/> |
| Alcohol during the 1. trimester (e.g. wine, beer, spirits) | <input type="checkbox"/> |
| Smoking (e.g. cigarettes)                                  | <input type="checkbox"/> |
| Dental X-ray                                               | <input type="checkbox"/> |

## HOW YOU ARE FEELING NOW

In this section of the survey questionnaire, the **Edinburgh Postnatal Depression Scale (EPDS)** was presented (Cox J, Holden J, Sagovsky R. *Detection of postnatal depression. Development of the 10-item edinburgh postnatal depression scale. The British Journal of Psychiatry.* 1987 June 1, 1987;150(6):782-6).

For peer review only

## HOW YOU SEE YOURSELF

In this section of the survey questionnaire, the **Big Five Inventory (BFI)** was presented (*John OP, Srivastava S, editors. The big five trait taxonomy: History, measurement, and theoretical perspectives: New York: Guilford; 1999; John OP, Robins RW, Pervin LA. Handbook of personality: Theory and research: The Guilford Press; 2008*).

For peer review only

**Appendix 2:** Websites used for recruitment and internet penetration rates in each country where data were collected

| Country                | Website used for recruitment                                                                                                                                                                                      | Internet penetration rates (%)      |
|------------------------|-------------------------------------------------------------------------------------------------------------------------------------------------------------------------------------------------------------------|-------------------------------------|
| <b>EUROPE</b>          |                                                                                                                                                                                                                   |                                     |
| <i>Western Europe</i>  |                                                                                                                                                                                                                   |                                     |
| <b>Austria</b>         | www.schwangerschaft.at; www.schwangerschafts-blog.at; www.fratz.at; www.netdoctor.at; www.babycenter.at; www.baby-boom.at; www.ekiz-dachverband.at; www.babyguide.at                                              | 93 <sup>*[1]</sup>                  |
| <b>France</b>          | www.aufeminin.com (Including ipad application to website subscribers)                                                                                                                                             | 91 <sup>*[1]</sup>                  |
| <b>Italy</b>           | <i>Pregnancy Forums:</i> www.gravidanzaonline.it; www.forumsalute.it; www.mammole.it; www.pianetamamma.it; www.miobambino.it<br><br><i>Targeted email to pregnancy forum subscribers:</i> www.gravidanzaonline.it | 70 <sup>*[1]</sup>                  |
| <b>Switzerland</b>     | www.bebe-bebe.com; www.swissmom.ch                                                                                                                                                                                | 84 <sup>*[2]</sup>                  |
| <b>The Netherlands</b> | www.lareb.nl; www.gezondzwangerzijn.nl; www.babybytes.nl                                                                                                                                                          | 98 <sup>*[1]</sup>                  |
| <b>United Kingdom</b>  | <i>Targeted email to pregnancy forum subscribers:</i> www.bounty.com<br><br><i>Pregnancy Forums:</i> www.pregnancyforum.co.uk; www.pregnancyforum.org.uk                                                          | 93 <sup>*[1]</sup>                  |
| <i>Northern Europe</i> |                                                                                                                                                                                                                   |                                     |
| <b>Finland</b>         | www.vauva.fi; www.meidanperhe.fi; www.kaksplus.fi                                                                                                                                                                 | 99 <sup>*[1]</sup>                  |
| <b>Iceland</b>         | <i>Pregnancy Forums:</i> www.bland.is                                                                                                                                                                             | 100 <sup>*[1]</sup>                 |
| <b>Norway</b>          | www.barnimagen.com; www.klikk.no; www.jormorsiri.no; www.tryggmamamedisin.no                                                                                                                                      | 99 <sup>*[1]</sup>                  |
| <b>Sweden</b>          | www.barntotal.se; www.minbebis.com; www.se.babycenter.com; www.socmed.gu.se                                                                                                                                       | 99 <sup>*[1]</sup>                  |
| <i>Eastern Europe</i>  |                                                                                                                                                                                                                   |                                     |
| <b>Croatia</b>         | www.cybermed.hr                                                                                                                                                                                                   | 80 <sup>*[1]</sup> (data from 2010) |
| <b>Poland</b>          | www.zzief.umlub.pl<br><br><i>Pregnancy Forums:</i> www.ebrzuszek.pl; www.babyboom.pl; www.zapytajpolozna.pl; www.planujemydziecko.pl; www.twoja-ciaza.com.pl                                                      | 84 <sup>*[1]</sup>                  |

Angela Lupattelli 12/29/13 11:18 AM

Deleted: participating

| Country                | Website used for recruitment                                                                                                                                                                                     | Internet penetration rates (%)       |
|------------------------|------------------------------------------------------------------------------------------------------------------------------------------------------------------------------------------------------------------|--------------------------------------|
| <b>Russia</b>          | www.babyblog.ru; www.littleone.ru<br><br><i>Pregnancy Forums:</i> www.woman.ru; www.9months.ru; www.bemam; www.280dney.ru; www.iampregnant.ru<br>www.pregnancy.org.ua; www.baby.ru; www.mama66.ru; www.spuzom.ru | 48 <sup>†</sup> [2]                  |
| <b>Serbia</b>          | www.ringeraja.rs                                                                                                                                                                                                 | 52 <sup>†</sup> [1] (data from 2009) |
| <b>Slovenia</b>        | <i>Pregnancy Forums:</i> www.med.over.net                                                                                                                                                                        | 92 <sup>†</sup> [1]                  |
| <b>AMERICAS</b>        |                                                                                                                                                                                                                  |                                      |
| <i>North America</i>   |                                                                                                                                                                                                                  |                                      |
| <b>Canada</b>          | www.otispregnancy.org; Facebook page of OTIS; www.babyontheway.com.ca<br><br><i>Pregnancy Forums:</i> www.babycentre.com.ca; www.thecradle.com; www.talk.sheknows.com; www.parenting.com                         | 94 <sup>†</sup> [3]                  |
| <b>USA</b>             | www.otispregnancy.org; Facebook page of OTIS; www.justmommies.com<br><br><i>Pregnancy Forums:</i> www.babyandbump.com; www.thecradle.com; www.talk.sheknows.com; www.parenting.com                               | 80 <sup>§</sup> [4]                  |
| <i>Central America</i> |                                                                                                                                                                                                                  |                                      |
| <b>Belize</b>          | www.otispregnancy.org; Facebook page of OTIS                                                                                                                                                                     | 23 <sup>[2]</sup>                    |
| <b>Costa Rica</b>      |                                                                                                                                                                                                                  | 43 <sup>[2]</sup>                    |
| <b>El Salvador</b>     |                                                                                                                                                                                                                  | 25 <sup>[2]</sup>                    |
| <b>Guatemala</b>       |                                                                                                                                                                                                                  | 16 <sup>[2]</sup>                    |
| <b>Honduras</b>        |                                                                                                                                                                                                                  | 16 <sup>[2]</sup>                    |
| <b>Nicaragua</b>       |                                                                                                                                                                                                                  | 14 <sup>[2]</sup>                    |
| <b>Panama</b>          |                                                                                                                                                                                                                  | 43 <sup>[2]</sup>                    |
| <i>South America</i>   |                                                                                                                                                                                                                  |                                      |
| <b>Argentina</b>       | www.otispregnancy.org; Facebook page of OTIS                                                                                                                                                                     | 67 <sup>[2]</sup>                    |
| <b>Bolivia</b>         |                                                                                                                                                                                                                  | 30 <sup>[2]</sup>                    |
| <b>Brazil</b>          | <i>Pregnancy Forums:</i> www.semanaasemana.com;                                                                                                                                                                  | 46 <sup>[2]</sup>                    |
| <b>Chile</b>           | www.univision.com; www.elembarazo.net                                                                                                                                                                            | 59 <sup>[2]</sup>                    |
| <b>Colombia</b>        |                                                                                                                                                                                                                  | 59 <sup>[2]</sup>                    |
| <b>Ecuador</b>         |                                                                                                                                                                                                                  | 44 <sup>[2]</sup>                    |
| <b>Paraguay</b>        |                                                                                                                                                                                                                  | 24 <sup>[2]</sup>                    |
| <b>Peru</b>            |                                                                                                                                                                                                                  | 37 <sup>[2]</sup>                    |

2

| Country          | Website used for recruitment                                                                           | Internet penetration rates (%) |
|------------------|--------------------------------------------------------------------------------------------------------|--------------------------------|
| Uruguay          |                                                                                                        | 56 <sup>[2]</sup>              |
| Venezuela        |                                                                                                        | 41 <sup>[2]</sup>              |
| <b>AUSTRALIA</b> |                                                                                                        |                                |
| Australia        | www.mothersafe.org.au; www.bubhub.com.au<br><br>Pregnancy Forums: www.abds.org.au;<br>www.birth.com.au | 83 <sup>‡ [5]</sup>            |

\*Indicates the frequency of internet access - at least once a week, including every day - among individuals aged 25- 34 years. Differences between men and women were relatively small. Slightly more than two thirds of men (70%) and 65% of women used the Internet regularly.

†Indicates individuals aged 16-45 years who used the internet for personal use.

§Indicates individuals > 18 years old, access from anywhere; household internet for women is equal to 68.1%; higher percentages are observed for people aged 25-54 years.

‡Indicates households with access to the internet at home.

#### Sources of internet penetration rates:

1. Seybert H. Internet use in households and by individuals in 2011. Eurostat Statistics in focus; 2011.
2. Internet World Stats. Usage and population statistics. Available at: <http://www.internetworldstats.com/>. Accessed 29 December, 2013.
3. Statistics Canada. Individual Internet use and E-commerce (2010). Available at: <http://www.statcan.gc.ca/daily-quotidien/111012/dq111012a-eng.htm>. Accessed 20 November, 2012.
4. United States Census Bureau. The 2012 Statistical Abstract. Information & Communications: Internet Publishing and Broadcasting and Internet Usage. Available at: [http://www.census.gov/compendia/statab/cats/information\\_communications/internet\\_publishing\\_and\\_broadcasting\\_and\\_internet\\_usage.html](http://www.census.gov/compendia/statab/cats/information_communications/internet_publishing_and_broadcasting_and_internet_usage.html). Accessed 13 November, 2012.
5. Australian Bureau of Statistics. Household Use of Information Technology, Australia, 2010-11 Available at: <http://www.abs.gov.au/ausstats/abs@.nsf/Latestproducts/8146.0Main%20Features12010-11?opendocument&tabname=Summary&prodno=8146.0&issue=2010-11&num=&view=>. Accessed 13 November, 2012.

**Appendix 3:** Socio-demographic characteristics of the study population and general birthing population on individual country**Appendix 3a:** Socio-demographic characteristics in Western European countries (Switzerland, Italy and United Kingdom (UK))

|                                                       | Study sample<br>in Switzerland<br>n=618 | General<br>birthing<br>population in<br>Switzerland<br>LB=80,808 <sup>[1]</sup> | Study sample<br>in Italy<br>n=926 | General<br>birthing<br>population in<br>Italy<br>LB=546,606 <sup>[1]</sup> | Study sample<br>in the UK<br>n=1,120 | General<br>birthing<br>population in<br>UK*<br>LB=723,165 <sup>[2]</sup> |
|-------------------------------------------------------|-----------------------------------------|---------------------------------------------------------------------------------|-----------------------------------|----------------------------------------------------------------------------|--------------------------------------|--------------------------------------------------------------------------|
|                                                       | (%)                                     | (%)                                                                             | (%)                               | (%)                                                                        | (%)                                  | (%)                                                                      |
| <i>No. of respondents/No. live births<sup>†</sup></i> | 4.6%                                    |                                                                                 | 1.0%                              |                                                                            | 0.9%                                 |                                                                          |
| <i>Mean Age +/- sd</i>                                | 31.6 +/- 4.3                            | 31.4 <sup>[3]</sup>                                                             | 32.3 +/- 5.0                      | 31.3 <sup>[4]</sup>                                                        | 30.5 +/- 5.2                         | 29.6 <sup>[2]</sup>                                                      |
| <i>Marital status</i>                                 |                                         |                                                                                 |                                   |                                                                            |                                      |                                                                          |
| In marriage                                           | 80.0                                    | 80.7 <sup>[3]</sup>                                                             | 68.8                              | 75.1 <sup>[1]</sup>                                                        | 63.3                                 | 53.2 <sup>[2]</sup>                                                      |
| Outside marriage                                      | 20.0                                    | 19.3 <sup>[3]</sup>                                                             | 31.2                              | 31.5 <sup>[1]</sup>                                                        | 36.7                                 | 46.8 <sup>[2]</sup>                                                      |
| <i>Parity</i>                                         |                                         |                                                                                 |                                   |                                                                            |                                      |                                                                          |
| No previous children                                  | 53.2                                    | -                                                                               | 59.7                              | 48.7 <sup>[5]</sup>                                                        | 48.0 <sup>†</sup>                    | 41.9 <sup>[2]</sup> †                                                    |
| <i>Educational level</i>                              |                                         |                                                                                 |                                   |                                                                            |                                      |                                                                          |
| Less than high school                                 | 11.0                                    | 11.7 <sup>[6]</sup>                                                             | 7.0                               | 25.2 <sup>[6]</sup>                                                        | 0.6                                  | 16.5 <sup>[2]</sup>                                                      |
| High school                                           | 13.6                                    | 49.2 <sup>[6]</sup>                                                             | 47.2                              | 49.2 <sup>[6]</sup>                                                        | 27.9                                 | 37.2 <sup>[2]</sup>                                                      |
| More than high school                                 | 47.2                                    | 39.1 <sup>[6]</sup>                                                             | 44.3                              | 25.6 <sup>[6]</sup>                                                        | 52.1                                 | 46.3 <sup>[2]</sup>                                                      |
| Other                                                 | 28.2                                    | -                                                                               | 1.5                               | -                                                                          | 19.3                                 | -                                                                        |
| <i>Women smoking before pregnancy</i>                 | 25.1                                    | 25.4 <sup>[7]</sup>                                                             | 34.2                              | 33.3 <sup>[4]</sup>                                                        | 25.2                                 | 25.7 <sup>[7]</sup>                                                      |
| <i>Women smoking during pregnancy</i>                 | 5.5                                     | 6.6 <sup>[8]</sup>                                                              | 10.5                              | 22.7 <sup>[9]</sup>                                                        | 7.1 <sup>‡</sup>                     | 13.2 <sup>[10]</sup> ‡                                                   |
| <i>Use of alcohol during pregnancy</i>                | 20.7                                    | 29.9 <sup>[8]</sup>                                                             | 17.9                              | 17.7 <sup>[9]</sup>                                                        | 28.3                                 | 24.0 <sup>[11]</sup> §                                                   |

Abbreviations: LB: Number of live births per year.

\*The figures shown here are statistic estimates for England and Wales. Scotland and Northern Ireland have separate statistical reports. Since more than 85% of the study population in UK were resident in England and about 8% in Wales, we are only showing national statistic data for these two parts of the UK.

1  
2  
3  
4  
5  
6  
7  
8  
9  
10  
11  
12  
13  
14  
15  
16  
17  
18  
19  
20  
21  
22  
23  
24  
25  
26  
27  
28  
29  
30  
31  
32  
33  
34  
35  
36  
37  
38  
39  
40  
41  
42  
43  
44  
45  
46  
47

<sup>¶</sup>The ratio “No. of respondents/No. live births” is calculated as the proportion (%) of pregnancies included in the study among live births in the country in two months (period of data collection).

<sup>†</sup>Among married women only – as provided by the Statistics Bureau in the UK.

<sup>‡</sup>Among women resident in England only (as provided by the Statistics Bureau in the UK, data on 4<sup>th</sup> Quarter of 2011).

<sup>§</sup>Women reporting at least one occasion during pregnancy of consuming more than four drinks in a day.

For peer review only



**Appendix 3b:** Socio-demographic characteristics in Western European countries (Austria, France and The Netherlands)

|                                             | Study sample in<br>Austria | General birthing<br>population in<br>Austria | Study sample<br>in France | General birthing<br>population in<br>France | Study sample<br>in The<br>Netherlands | General birthing<br>population in The<br>Netherlands |
|---------------------------------------------|----------------------------|----------------------------------------------|---------------------------|---------------------------------------------|---------------------------------------|------------------------------------------------------|
|                                             | n=82                       | LB=78,109 <sup>[1]</sup>                     | n=374                     | LB=824,263 <sup>[1]</sup>                   | n=81                                  | LB=180,060 <sup>[1]</sup>                            |
|                                             | (%)                        | (%)                                          | (%)                       | (%)                                         | (%)                                   | (%)                                                  |
| <i>No. of respondents/No. live births</i> * | 0.6%                       |                                              | 0.3%                      |                                             | 0.3%                                  |                                                      |
| <b>Mean Age +/- sd</b>                      | 30.6 +/- 4.6               | 30.0 <sup>[12]</sup>                         | 29.6 +/- 4.9              | 30.1 <sup>[13]</sup>                        | 32.0 +/- 6.4                          | 31.0 <sup>[14]</sup>                                 |
| <b>Marital status</b>                       |                            |                                              |                           |                                             |                                       |                                                      |
| In marriage                                 | 48.8                       | 59.6 <sup>[15]</sup>                         | 48.9                      | 45.0 <sup>[1]</sup>                         | 69.1                                  | 58.2 <sup>[14]</sup>                                 |
| Outside marriage                            | 51.2                       | 40.4 <sup>[15]</sup>                         | 51.1                      | 55.0 <sup>[1]</sup>                         | 30.8                                  | 41.8 <sup>[14]</sup>                                 |
| <b>Parity</b>                               |                            |                                              |                           |                                             |                                       |                                                      |
| No previous children                        | 63.4                       | 47.96 <sup>[15]</sup>                        | 52.9                      | 44.2 <sup>[16]</sup>                        | 38.3                                  | 46.4 <sup>[14]</sup>                                 |
| <b>Educational level</b>                    |                            |                                              |                           |                                             |                                       |                                                      |
| Less than high school                       | 9.8                        | 13.3 <sup>[6]</sup>                          | 1.6                       | 15.4 <sup>[6]</sup>                         | 9.9                                   | 15.9 <sup>[6]</sup>                                  |
| High-school                                 | 32.9                       | 64.1 <sup>[6]</sup>                          | 25.1                      | 37.4 <sup>[6]</sup>                         | 66.7                                  | 40.2 <sup>[6]</sup>                                  |
| More than high school                       | 40.2                       | 22.7 <sup>[6]</sup>                          | 57.0                      | 47.2 <sup>[6]</sup>                         | 23.5                                  | 43.9 <sup>[6]</sup>                                  |
| Other                                       | 17.1                       | -                                            | 16.3                      | -                                           | -                                     | -                                                    |
| <b>Women smoking before pregnancy</b>       | 31.7                       | 32.1 <sup>[17]</sup>                         | 39.3                      | 39.0 <sup>[16]</sup>                        | 34.6                                  | 29.5 <sup>[7]</sup>                                  |
| <b>Women smoking during pregnancy</b>       | 4.9                        | -                                            | 14.2                      | 28.0 <sup>[16]</sup>                        | 14.8                                  | 17.1 <sup>[18]</sup>                                 |
| <b>Use of alcohol during pregnancy</b>      | 13.4                       | -                                            | 11.5                      | 52.0 <sup>[19]</sup>                        | 11.1                                  | 16-35 <sup>[14]</sup>                                |

Abbreviations: LB: Number of live births per year.

\*The ratio "No. of respondents/No. live births" is calculated as the proportion (%) of pregnancies included in the study among live births in the country in two months (period of data collection).

## Appendix 3c: Socio-demographic characteristics in Northern European countries (Norway, Finland and Sweden)

|                                            | Study sample in Norway<br>n=1,228<br>(%) | General birthing population in Norway<br>LB=60,220 <sup>[1]</sup><br>(%) | Study sample in Finland<br>n=574<br>(%) | General birthing population in Finland<br>LB=59,961 <sup>[1]</sup><br>(%) | Study sample in Sweden<br>n=887<br>(%) | General birthing population in Sweden<br>LB=111,770 <sup>[1]</sup><br>(%) |
|--------------------------------------------|------------------------------------------|--------------------------------------------------------------------------|-----------------------------------------|---------------------------------------------------------------------------|----------------------------------------|---------------------------------------------------------------------------|
| <i>No. of respondents/No. live births*</i> | 12.2%                                    |                                                                          | 5.7%                                    |                                                                           | 4.8%                                   |                                                                           |
| <b>Mean Age +/- sd</b>                     | 29.0 +/- 4.6                             | 29.8 +/- 5.3 <sup>[20]</sup>                                             | 29.0 +/- 5.1                            | 30.1 <sup>[21]</sup>                                                      | 29.8 +/- 5.3                           | 30.3 <sup>[22]</sup>                                                      |
| <b>Marital status</b>                      |                                          |                                                                          |                                         |                                                                           |                                        |                                                                           |
| In marriage                                | 39.1                                     | 46.0 <sup>[20]</sup>                                                     | 59.4                                    | 57.8 <sup>[21]</sup>                                                      | 40.7                                   | 45.8 <sup>[1]</sup>                                                       |
| Outside marriage                           | 60.9                                     | 53.4 <sup>[20]</sup>                                                     | 40.6                                    | 42.0 <sup>[21]</sup>                                                      | 59.3                                   | 54.2 <sup>[1]</sup>                                                       |
| Unknown                                    | -                                        | 0.6 <sup>[20]</sup>                                                      | -                                       | 0.2 <sup>[21]</sup>                                                       |                                        |                                                                           |
| <b>Parity</b>                              |                                          |                                                                          |                                         |                                                                           |                                        |                                                                           |
| No previous children                       | 41.4                                     | 42.4 <sup>[20]</sup>                                                     | 35.5                                    | 42.2 <sup>[21]</sup>                                                      | 63.1                                   | 44.9 <sup>[22]</sup>                                                      |
| <b>Educational level</b>                   |                                          |                                                                          |                                         |                                                                           |                                        |                                                                           |
| Less than high school                      | 4.5                                      | 14.7 <sup>[6]</sup>                                                      | 8.2                                     | 7.1 <sup>[6]</sup>                                                        | 5.2                                    | 11.1 <sup>[6]</sup>                                                       |
| High-school                                | 28.0                                     | 31.4 <sup>[6]</sup>                                                      | 36.4                                    | 44.5 <sup>[6]</sup>                                                       | 30.0                                   | 38.2 <sup>[6]</sup>                                                       |
| More than high school                      | 46.9                                     | 53.9 <sup>[6]</sup>                                                      | 52.6                                    | 48.4 <sup>[6]</sup>                                                       | 60.6                                   | 50.6 <sup>[6]</sup>                                                       |
| Other                                      | 20.7                                     | -                                                                        | 2.8                                     | -                                                                         | 4.2                                    | -                                                                         |
| <b>Women smoking before pregnancy</b>      | 33.5                                     | 36.5 <sup>[7]</sup>                                                      | 36.7                                    | 19.7 <sup>[7]</sup>                                                       | 25.0                                   | 27.2 <sup>[7]</sup>                                                       |
| <b>Women smoking during pregnancy</b>      | 6.8                                      | 7.0 <sup>[20]</sup>                                                      | 11.7                                    | 15.2 <sup>[21]</sup>                                                      | 5.4                                    | 6.5 <sup>[22]</sup>                                                       |
| <b>Use of alcohol during pregnancy</b>     | 4.1                                      | 7.4 <sup>[23]</sup>                                                      | 13.9                                    | -                                                                         | 7.2                                    | 5.9 <sup>[24]</sup>                                                       |

Abbreviations: LB: Number of live births per year.

\*The ratio "No. of respondents/No. live births" is calculated as the proportion (%) of pregnancies included in the study among live births in the country in two months (period of data collection).

**Appendix 3d:** Socio-demographic characteristics in Northern European countries (Iceland)

|                                            | Study sample in<br>Iceland<br>n=71 | General birthing<br>population in Iceland<br>LB=4,492 <sup>[1]</sup> |
|--------------------------------------------|------------------------------------|----------------------------------------------------------------------|
|                                            | (%)                                | (%)                                                                  |
| <i>No. of respondents/No. live births*</i> | 9.3%                               |                                                                      |
| <b>Age range (in years)</b>                |                                    |                                                                      |
| 15-20                                      | 11.3                               | 5.1 <sup>[25]</sup>                                                  |
| 21-25                                      | 16.9                               | 19.3 <sup>[25]</sup>                                                 |
| 26-30                                      | 42.3                               | 34.2 <sup>[25]</sup>                                                 |
| 31-35                                      | 15.5                               | 27.3 <sup>[25]</sup>                                                 |
| 36-40                                      | 12.7                               | 11.7 <sup>[25]</sup>                                                 |
| ≥41                                        | 1.4                                | 2.4 <sup>[25]</sup>                                                  |
| <b>Marital status</b>                      |                                    |                                                                      |
| In marriage                                | 31.0                               | 35.0 <sup>[25]</sup>                                                 |
| Outside marriage                           | 69.0                               | 65.0 <sup>[25]</sup>                                                 |
| <b>Parity</b>                              |                                    |                                                                      |
| No previous children                       | 47.9                               | 38.1 <sup>[25]</sup>                                                 |
| <b>Educational level</b>                   |                                    |                                                                      |
| Less than high school                      | 25.4                               | 21.4 <sup>[6]</sup>                                                  |
| High-school                                | 18.3                               | 30.5 <sup>[6]</sup>                                                  |
| More than high school                      | 43.7                               | 48.1 <sup>[6]</sup>                                                  |
| Other                                      | 12.7                               | -                                                                    |
| <b>Women smoking before pregnancy</b>      | 40.8                               | 35.5 <sup>[7]</sup>                                                  |

Abbreviations: LB: Number of live births per year.

\*The ratio "No. of respondents/No. live births" is calculated as the proportion (%) of pregnancies included in the study among live births in the country in two months (period of data collection).

**Appendix 3e:** Socio-demographic characteristics in Eastern European countries (Croatia, Slovenia and Serbia)

|                                            | Study sample in<br>Croatia | General birthing<br>population in<br>Croatia | Study sample in<br>Slovenia | General birthing<br>population in<br>Slovenia | Study sample in<br>Serbia | General birthing<br>population in<br>Serbia |
|--------------------------------------------|----------------------------|----------------------------------------------|-----------------------------|-----------------------------------------------|---------------------------|---------------------------------------------|
|                                            | n=286                      | LB=41,197 <sup>[1]</sup>                     | n=149                       | LB=21,947 <sup>[1]</sup>                      | n=220                     | LB=65,598 <sup>[1]</sup>                    |
|                                            | <b>n (%)</b>               | <b>(%)</b>                                   | <b>n (%)</b>                | <b>(%)</b>                                    | <b>n (%)</b>              | <b>(%)</b>                                  |
| <i>No. of respondents/No. live births*</i> | 4.2%                       |                                              | 4.1%                        |                                               | 2.0%                      |                                             |
| <b>Mean Age +/- sd</b>                     | 29.1 +/- 4.5 <sup>†</sup>  | 27.7 <sup>[26]</sup>                         | 31.7 +/- 4.5                | 30.4 <sup>[27]</sup>                          | 29.2 +/- 3.9*             | 28.7 <sup>[1,28]</sup>                      |
| <b>Marital status</b>                      |                            |                                              |                             |                                               |                           |                                             |
| In marriage                                | 83.9                       | 86.7 <sup>[26]</sup>                         | 47.0                        | 43.2 <sup>[27]</sup>                          | 90.1                      | 76.1 <sup>[28]</sup>                        |
| Outside marriage                           | 16.1                       | 13.3 <sup>[26]</sup>                         | 53.0                        | 56.8 <sup>[27]</sup>                          | 9.9                       | 23.9 <sup>[28]</sup>                        |
| <b>Parity</b>                              |                            |                                              |                             |                                               |                           |                                             |
| No previous children                       | 50.7                       | 46.9 <sup>[26]</sup>                         | 45.6                        | 48.5 <sup>[27]</sup>                          | 46.8                      | 51.1 <sup>[28,29]</sup>                     |
| <b>Educational level</b>                   |                            |                                              |                             |                                               |                           |                                             |
| Less than high school                      | 1.0                        | 3.1 <sup>[26]</sup>                          | 2.0                         | 8.5 <sup>[27]</sup>                           | 0.9                       | 15.9 <sup>[29]</sup>                        |
| High-school                                | 36.7                       | 52.5 <sup>[26]</sup>                         | 24.8                        | 48.5 <sup>[27]</sup>                          | 33.6                      | 54.9 <sup>[29]</sup>                        |
| More than high school                      | 61.2                       | 44.4 <sup>[26]</sup>                         | 69.1                        | 43.0 <sup>[27]</sup>                          | 61.8                      | 29.2 <sup>[29]</sup>                        |
| Other                                      | 1.0                        | -                                            | 4.0                         | -                                             | 3.6                       | -                                           |
| <b>Women smoking before pregnancy</b>      | 50.0                       | 34.4 <sup>[26]</sup>                         | 32.9                        | 34.4 <sup>[7]</sup>                           | 49.1                      | 29.9 <sup>[30,31]</sup>                     |
| <b>Women smoking during pregnancy</b>      | 18.8                       | 23.1 <sup>[32]</sup>                         | 6.7                         | 9.6-11.2 <sup>[33]</sup>                      | 18.2                      | 18.4 <sup>[31]</sup>                        |
| <b>Use of alcohol during pregnancy</b>     | 12.6                       | 15.5 <sup>[34]</sup>                         | 32.2                        | -                                             | 15.0                      | -                                           |

Abbreviations: LB: Number of live births per year.

\* The ratio "No. of respondents/No. live births" is calculated as the proportion (%) of pregnancies included in the study among live births in the country in two months (period of data collection).

<sup>†</sup>Mean age for first child (as it is available from the Statistics Bureau reports in Croatia and Serbia).

**Appendix 3f:** Socio-demographic characteristics in Eastern European countries (Poland and Russia)

|                                            | Study sample in<br>Poland<br>n=679 | General birthing<br>population in Poland<br>LB=388,416 <sup>[11]</sup> | Study sample in<br>Russia<br>n=1,008 | General birthing<br>population in Russia<br>LB=1,796,629 <sup>[11]</sup> |
|--------------------------------------------|------------------------------------|------------------------------------------------------------------------|--------------------------------------|--------------------------------------------------------------------------|
|                                            | (%)                                | (%)                                                                    | (%)                                  | (%)                                                                      |
| <i>No. of respondents/No. live births*</i> | 1.0%                               |                                                                        | 0.3%                                 |                                                                          |
| <b>Mean Age +/- sd</b>                     | 27.1 +/- 4.1                       | 28.6 <sup>[35]</sup> †                                                 | 27.7 +/- 4.8                         | 27.4 <sup>[36]</sup>                                                     |
| <b>Marital status</b>                      |                                    |                                                                        |                                      |                                                                          |
| In marriage                                | 85.0                               | 79.4 <sup>[35]</sup>                                                   | 85.3                                 | 73.9 <sup>[36]</sup>                                                     |
| Outside marriage                           | 15.0                               | 20.6 <sup>[35]</sup>                                                   | 14.7                                 | 26.1 <sup>[36]</sup>                                                     |
| <b>Parity</b>                              |                                    |                                                                        |                                      |                                                                          |
| No previous children                       | 40.6                               | 50.1 <sup>[35]</sup>                                                   | 57.9                                 | -                                                                        |
| <b>Educational level</b>                   |                                    |                                                                        |                                      |                                                                          |
| Less than high school                      | 1.9                                | 8.7 <sup>[35]</sup>                                                    | 1.6                                  | -                                                                        |
| High-school                                | 31.1                               | 49.6 <sup>[35]</sup>                                                   | 9.3                                  | -                                                                        |
| More than high school                      | 65.1                               | 41.6 <sup>[35]</sup>                                                   | 75.1                                 | -                                                                        |
| Other                                      | 1.9                                | -                                                                      | 14.0                                 | -                                                                        |
| <b>Women smoking before pregnancy</b>      | 49.2                               | 25.0 <sup>[37]</sup>                                                   | 46.1                                 | 30.8 <sup>[38]</sup>                                                     |
| <b>Women smoking during pregnancy</b>      | 12.8                               | 22-30 <sup>[37]</sup>                                                  | 9.6                                  | 4.3-6.5 <sup>[39,40]</sup>                                               |
| <b>Use of alcohol during pregnancy</b>     | 9.6                                | 15.3 <sup>[41]</sup>                                                   | 26.0                                 | 60.0 <sup>[42]</sup>                                                     |

Abbreviations: LB: Number of live births per year.

\* The ratio “No. of respondents/No. live births” is calculated as the proportion (%) of pregnancies included in the study among live births in the country in two months (period of data collection).

†Median age of women at birth, not mean age.

Appendix 3g: Socio-demographic characteristics in North American countries (Canada and USA)

|                                            | Study sample<br>in Canada | General birthing<br>population in<br>Canada <sup>[43]</sup> | Study sample in The<br>USA | General birthing<br>population in USA <sup>[44]</sup> |
|--------------------------------------------|---------------------------|-------------------------------------------------------------|----------------------------|-------------------------------------------------------|
|                                            | n=236<br>n (%)            | LB=377,636<br>(%)                                           | n=297<br>n (%)             | LB=3,999,386<br>(%)                                   |
| <i>No. of respondents/No. live births*</i> | 0.4%                      |                                                             | 0.04%                      |                                                       |
| <b>Age range (in years)</b>                |                           |                                                             |                            |                                                       |
| 15-19                                      | 2.1                       | 3.9 <sup>[43]</sup>                                         | 4.7                        | 9.3 <sup>[44]</sup>                                   |
| 20-24                                      | 25.0                      | 14.6 <sup>[43]</sup>                                        | 18.2                       | 23.8 <sup>[44]</sup>                                  |
| 25-29                                      | 30.1                      | 30.2 <sup>[43]</sup>                                        | 28.3                       | 28.3 <sup>[44]</sup>                                  |
| 30-34                                      | 30.5                      | 32.2 <sup>[43]</sup>                                        | 29.3                       | 24.1 <sup>[44]</sup>                                  |
| 35-39                                      | 11.0                      | 15.6 <sup>[43]</sup>                                        | 15.2                       | 11.6 <sup>[44]</sup>                                  |
| 40-44                                      | 1.3                       | 3.1 <sup>[43]</sup>                                         | 4.0                        | 2.7 <sup>[44]</sup>                                   |
| ≥45                                        | -                         | 0.2 <sup>[43]</sup>                                         | 0.3                        | 0.2 <sup>[44]</sup>                                   |
| <b>Mean Age +/- sd</b>                     | 28.3 +/- 5.2              | 29.6 <sup>[43]</sup>                                        | 29.3 +/- 6.1               | -                                                     |
| <b>Marital status</b>                      |                           |                                                             |                            |                                                       |
| In marriage                                | 42.4                      | 60.4 <sup>[43]</sup>                                        | 67.0                       | 59.2 <sup>[45]</sup>                                  |
| Outside marriage                           | 57.6                      | 28.8 <sup>[43]</sup>                                        | 33.0                       | 39.9 <sup>[45]</sup>                                  |
| Unknown                                    | -                         | 10.8 <sup>[43]</sup>                                        | -                          | 0.9 <sup>[45]</sup>                                   |
| <b>Parity</b>                              |                           |                                                             |                            |                                                       |
| No previous children                       | 48.3                      | 43.3 <sup>[43]</sup>                                        | 41.1                       | 40.1 <sup>[44]</sup>                                  |
| <b>Educational level</b>                   |                           |                                                             |                            |                                                       |
| Less than high school                      | 1.3                       | 8.4 <sup>[46]</sup>                                         | 2.7                        | 17.4 <sup>[47]</sup>                                  |
| High-school                                | 24.6                      | -                                                           | 25.3                       | 24.4 <sup>[47]</sup>                                  |
| More than high school                      | 67.8                      | 69.6 <sup>[46]</sup>                                        | 62.0                       | 58.2 <sup>[47]</sup>                                  |
| Other                                      | 6.4                       | -                                                           | 10.1                       | -                                                     |
| <b>Women smoking before pregnancy</b>      | 29.2                      | 22.0 <sup>[48]</sup>                                        | 28.3                       | 21.5 <sup>[49]</sup>                                  |

|                                               | Study sample<br>in Canada | General birthing<br>population in<br>Canada <sup>[43]</sup> | Study sample in The<br>USA | General birthing<br>population in USA <sup>[44]</sup> |
|-----------------------------------------------|---------------------------|-------------------------------------------------------------|----------------------------|-------------------------------------------------------|
|                                               | n=236<br>n (%)            | LB=377,636<br>(%)                                           | n=297<br>n (%)             | LB=3,999,386<br>(%)                                   |
| <b><i>Women smoking during pregnancy</i></b>  | 16.1                      | 13.4 <sup>[46]</sup>                                        | 8.1                        | 10.2 <sup>[50]</sup>                                  |
| <b><i>Use of alcohol during pregnancy</i></b> | 16.1                      | 10.5 <sup>[46]</sup>                                        | 17.5                       | 15.5 <sup>[49]</sup>                                  |

Abbreviations: LB: Number of live births per year.

\*The ratio "No. of respondents/No. live births" is calculated as the proportion (%) of pregnancies included in the study among live births in the country in two months (period of data collection).

## Appendix 3h: Socio-demographic characteristics in Australia

|                                               | Study sample in Australia<br>n=217 | General birthing population in Australia <sup>[51]</sup><br>LB=301,617 |
|-----------------------------------------------|------------------------------------|------------------------------------------------------------------------|
|                                               | n (%)                              | (%)                                                                    |
| <i>No. of respondents/No. live births*</i>    | 0.4%                               |                                                                        |
| <i>Mean Age +/- sd</i>                        | 31.1 +/- 5.7                       | 30.7 <sup>[51]</sup>                                                   |
| <b><i>Marital status</i></b>                  |                                    |                                                                        |
| In marriage                                   | 70.5                               | 65.8 <sup>[51]</sup>                                                   |
| Outside marriage                              | 29.5                               | 34.2 <sup>[51]</sup>                                                   |
| <b><i>Parity</i></b>                          |                                    |                                                                        |
| No previous children                          | 47.9                               | 43.8 <sup>[51]</sup>                                                   |
| <b><i>Educational level</i></b>               |                                    |                                                                        |
| Less than high school                         | 0.5                                | 20.6 <sup>† [52]</sup>                                                 |
| High-school                                   | 29.0                               |                                                                        |
| More than high school                         | 63.1                               | 56.0 <sup>[53]</sup>                                                   |
| Other                                         | 7.4                                | -                                                                      |
| <b><i>Women smoking before pregnancy</i></b>  | 29.1                               | 29.9 <sup>[54]</sup>                                                   |
| <b><i>Women smoking during pregnancy</i></b>  | 14.3                               | 14.5 <sup>[55]</sup>                                                   |
| <b><i>Use of alcohol during pregnancy</i></b> | 27.2                               | 29.0 <sup>[56]</sup>                                                   |

Abbreviations: LB: Number of live births per year.

\*The ratio "No. of respondents/No. live births" is calculated as the proportion (%) of pregnancies included in the study among live births in the country in two months (period of data collection).

†Refers to the educational levels "high school" and "less than high school" grouped together.



**Sources of socio-demographic characteristics of the general birthing population:**

1. Eurostat. Live births by mother's age at last birthday and legal marital status. Available at: [http://appsso.eurostat.ec.europa.eu/nui/show.do?dataset=demo\\_fagec&lang=en](http://appsso.eurostat.ec.europa.eu/nui/show.do?dataset=demo_fagec&lang=en). Accessed 6 November, 2012.
2. UK National Statistics. Characteristics of Birth 1 and 2/of mother 1 and 2, England and Wales. 2010. Available at: <http://www.statistics.gov.uk/hub/population/births-and-fertility/maternities/index.html>. Accessed 12 November, 2012.
3. Swiss Statistics. Components of population change – Data, indicators. Available at: <http://www.bfs.admin.ch/bfs/portal/en/index/themen/01/06/blank/key/01.html>. Accessed 6 November, 2012.
4. Istat - Istituto nazionale di statistica. Demography in figures. 2011. Available at: [http://demo.istat.it/index\\_e.html](http://demo.istat.it/index_e.html). Accessed 6 November, 2012.
5. Donati S, Baglio G, Spinelli A, et al. Drug use in pregnancy among Italian women. *Eur J Clin Pharmacol* 2000;**56**(4):323-8.
6. Eurostat. Persons with a given education attainment level by sex and age groups (%). Available at: [http://epp.eurostat.ec.europa.eu/portal/page/portal/product\\_details/dataset?p\\_product\\_code=EDAT\\_LFS\\_9903](http://epp.eurostat.ec.europa.eu/portal/page/portal/product_details/dataset?p_product_code=EDAT_LFS_9903). Accessed 6 November, 2012.
7. Eurostat. Smokers by sex. Available at: [http://epp.eurostat.ec.europa.eu/portal/page/portal/product\\_details/dataset?p\\_product\\_code=TPS00169](http://epp.eurostat.ec.europa.eu/portal/page/portal/product_details/dataset?p_product_code=TPS00169). Accessed 6 November, 2012.
8. Lemola S, Grob A. Drinking and smoking in pregnancy: what questions do Swiss physicians ask? *Swiss Med Wkly* 2007;**137**(3-4):66-9.
9. De Santis M, De Luca C, Mappa I, et al. Smoke, alcohol consumption and illicit drug use in an Italian population of pregnant women. *Eur J Obstet Gynecol Reprod Biol* 2011;**159**(1):106-10.
10. The Health and Social Care Information Centre. Statistics on women's smoking status at time of delivery: England, Quarter 1, 2012/13. 2012. Available at: <http://www.ic.nhs.uk/pubs/wsstd1213q1>. Accessed 12 November, 2012.
11. Sayal K, Heron J, Golding J, et al. Binge pattern of alcohol consumption during pregnancy and childhood mental health outcomes: longitudinal population-based study. *Pediatrics* 2009;**123**(2):e289-96.
12. Statistics Austria. Births. Long-term and current final annual results. 2011. Available at: [http://www.statistik.at/web\\_en/statistics/population/births/index.html](http://www.statistik.at/web_en/statistics/population/births/index.html). Accessed November 6th, 2012.
13. National Institute of Statistics and Economic Studies INSEE. Population. Available at: <http://www.insee.fr/en/themes/theme.asp?theme=2>. Accessed 7 November, 2012.
14. Statline, Centraal Bureaus voor de Statistiek. Population. 2012. Available at: <http://www.cbs.nl/en-GB/menu/themas/bevolking/nieuws/default.htm>. Accessed 10 November, 2012.
15. STATcube - Statistical Database of Statistics Austria. Available at: <http://statcube.at/superweb/login.do?guest=guest>. Accessed 6 November, 2012.
16. Menai M, Heude B, Slama R, et al. Association between maternal blood cadmium during pregnancy and birth weight and the risk of fetal growth restriction: The EDEN mother-child cohort study. *Reprod Toxicol* 2012;**34**(4):622-27.
17. Jahrbuch der GESUNDHEITSSTATISTIK. Wein: Statistika Austria. 2011.
18. Leermakers ET, Taal HR, Bakker R, et al. A common genetic variant at 15q25 modifies the associations of maternal smoking during pregnancy with fetal growth: the generation R study. *PLoS One* 2012;**7**(4):e34584.
19. de Chazeron I, Llorca PM, Ughetto S, et al. Is pregnancy the time to change alcohol consumption habits in France? *Alcohol Clin Exp Res* 2008;**32**(5):868-73.
20. Norwegian Institute of Public Health. Medisinsk fødselsregister statistikkbank - statistikk om alle fødsler i Norge. 2011. Available at: <http://mfr-nesstar.uib.no/mfr/>. Accessed 6 November, 2012.
21. The National Institute for Health and Welfare, Helsinki Finland. Liitetaulukot - Bilagetabeller - Appendix Tables, 2010.
22. Heino A, Gissler M. Nordic Perinatal Statistics 2010: National Institute for Health and Welfare. Helsinki, Finland. 2012.
23. Ystrom E, Vollrath ME, Nordeng H. Effects of personality on use of medications, alcohol, and cigarettes during pregnancy. *Eur J Clin Pharmacol* 2012;**68**(5):845-51.

24. Nilsen P, Holmqvist M, Hultgren E, et al. Alcohol use before and during pregnancy and factors influencing change among Swedish women. *Acta Obstet Gynecol Scand* 2008;**87**(7):768-74.
25. Births and Deaths. Statistics Iceland. Available at: <http://www.statice.is/Statistics/Population/Births-and-deaths>. Accessed 6 November, 2012.
26. Statistical Yearbook of the Republic of Croatia. Zagreb: Croatian Bureau of Statistics, 2011.
27. Statistical Office of the Republic of Slovenia. SI-STAT Data Portal. Population. Available at: <http://pxweb.stat.si/pxweb/Database/Demographics/Demographics.asp>. Accessed 7 November, 2012.
28. Statistical Yearbook of the Republic of Serbia. Demographic Yearbook in Republic of Serbia. Belgrade: Statistical Office of the Republic of Serbia, 2011.
29. Krstev S, Marinkovic J, Simic S, et al. Prevalence and predictors of smoking and quitting during pregnancy in Serbia: results of a nationally representative survey. *Int J Public Health* 2011.
30. Statistical Office of the Republic of Serbia. Women and Men in the Republic of Serbia, Belgrade, 2011.
31. Odalovic M, Vezmar Kovacevic S, Ilic K, et al. Drug use before and during pregnancy in Serbia. *Int J Clin Pharm* 2012;**34**(5):719-27.
32. Strinic T, Bukovic D, Sumilin L, et al. Socio-demographic characteristics and lifestyle habits of pregnant women smokers. *Coll Antropol* 2005;**29**(2):611-4.
33. Antolič B, Geršak K, Verdenik I, et al. Adverse effects of thyroid dysfunction on pregnancy and pregnancy outcome: Epidemiologic study in Slovenia. *Journal of Maternal-Fetal and Neonatal Medicine* 2006;**19**(10):651-54.
34. Petkovic G, Barisic I. FAS prevalence in a sample of urban schoolchildren in Croatia. *Reprod Toxicol* 2010;**29**(2):237-41.
35. Demographic Yearbook of Poland. Warsaw: Central Statistical Office of Poland, 2011.
36. The Demographic Yearbook of Russia - statistical handbook. Moscow: Federal State Statistics Service (Rosstat), 2010.
37. Przewoźniak K, Zatoński W. Ekspertyza „zachowania zdrowotne kobiet w ciąży”. Warszawa: Zakład Epidemiologii i Prewencji Nowotworów, Centrum Onkologii – Instytut w Warszawie. Posiedzenie Plenarne Rady Naukowej przy Ministrze Zdrowia, Ministerstwo Zdrowia, 2010.
38. Current tobacco use and secondhand smoke exposure among women of reproductive age - 14 countries, 2008-2010. *MMWR Morb Mortal Wkly Rep* 2012;**61**:877-82.
39. Kelmanson IA, Erman LV, Litvina SV. Maternal smoking during pregnancy and behavioural characteristics in 2 - 4-month-old infants. *Klin Padiatr* 2002;**214**(6):359-64.
40. Hugg TT, Jaakkola MS, Ruotsalainen RO, et al. Parental smoking behaviour and effects of tobacco smoke on children's health in Finland and Russia. *Eur J Public Health* 2008;**18**(1):55-62.
41. Wojtyła A, Kapka-Skrzypczak L, Diatczyk J, et al. Alcohol-related Developmental Origin of Adult Health - population studies in Poland among mothers and newborns (2010-2012). *Ann Agric Environ Med* 2012;**19**(3):365-77.
42. Kristjanson AF, Wilsnack SC, Zvartau E, et al. Alcohol use in pregnant and nonpregnant Russian women. *Alcohol Clin Exp Res* 2007;**31**(2):299-307.
43. Statistics Canada. Births. 2010. Available at: <http://www.statcan.gc.ca/daily-quotidien/111220/dq111220g-eng.htm>. Accessed 12 November 2012.
44. Hamilton B, Martin J, Ventura S. National Vital Statistics Reports. Births: Preliminary Data for 2010: U.S. Department of health and human services. Centers for Disease Control and Prevention. National Center for Health Statistics. National Vital Statistics System, 2011.
45. OECD. Panorama de la société 2011: OECD Publishing.
46. Canadian Perinatal Health Report, 2008 Edition. Ottawa: Public Health Agency of Canada, 2008.
47. The 2012 Statistical Abstract. The National Data Book. Women With Births in the Past 12 Months by Citizenship Status, Educational Attainment, and Poverty Status, by State. 2009. Available at: [http://www.census.gov/compendia/statab/cats/births\\_deaths\\_marriages\\_divorces/births.html](http://www.census.gov/compendia/statab/cats/births_deaths_marriages_divorces/births.html). Accessed 12 November, 2012.
48. Public Health Agency of Canada. What Mothers Say: The Canadian Maternity Experiences Survey. Ottawa, 2009.
49. Substance Abuse and Mental Health Services Administration, Results from the 2010 National Survey on Drug Use and Health: Summary of National Findings. NSDUH Series H-41, HHS Publication No. (SMA) 11-4658. Rockville, MD: Substance Abuse and Mental Health Services Administration, 2011.
50. Health, United States, 2011: With Special Feature on Socioeconomic Status and Health. Hyattsville, MD: National Center for Health Statistics, 2012.
51. Australian Bureau of Statistics. Births, Australia. 2011. Available at: <http://www.abs.gov.au/AUSSTATS/abs@.nsf/mf/3301.0>. Accessed 13 November, 2012.

- 1
- 2
- 3 52. Sawicki E, Stewart K, Wong S, et al. Medication use for chronic health conditions by pregnant women attending an Australian maternity hospital. *Aust N Z J Obstet Gynaecol* 2011;**51**(4):333-38.
- 4 53. Australian Bureau Statistics. Australian Social Trends, Sep 2012. 2012; Available at:  
5 <http://www.abs.gov.au/AUSSTATS/abs@.nsf/Lookup/4102.0Main+Features20Sep+2012>. Accessed 13 November, 2012.
- 6 54. Hotham E, Ali R, White J, et al. Pregnancy-related changes in tobacco, alcohol and cannabis use reported by antenatal patients at two public hospitals in South Australia.  
7 *Aust N Z J Obstet Gynaecol* 2008;**48**(3):248-54.
- 8 55. Australia's mothers and babies 2009. Perinatal statistics series no. 25. Cat. no. PER 52. Canberra: AIHW, 2011.
- 9 56. Maloney E, Hutchinson D, Burns L, et al. Prevalence and predictors of alcohol use in pregnancy and breastfeeding among Australian women. *Birth* 2011;**38**(1):3-9.
- 10
- 11
- 12
- 13
- 14
- 15
- 16
- 17
- 18
- 19
- 20
- 21
- 22
- 23
- 24
- 25
- 26
- 27
- 28
- 29
- 30
- 31
- 32
- 33
- 34
- 35
- 36
- 37
- 38
- 39
- 40
- 41
- 42
- 43
- 44
- 45
- 46
- 47

For peer review only

**Appendix 4:** Sample size calculation (using 5% precision with 95% confidence interval) for the population survey on region and individual country levels.

|                             | Study sample | Population size* | Expected prevalence    |                        |                        |                            |                            |
|-----------------------------|--------------|------------------|------------------------|------------------------|------------------------|----------------------------|----------------------------|
|                             |              |                  | Any medication use=80% | Any medication use=70% | OTC medication use=60% | Chronic medication use=30% | Chronic medication use=15% |
| <b>Required sample size</b> |              |                  |                        |                        |                        |                            |                            |
| <b>Western Europe</b>       | 3,201        | Not known        | 246                    | 323                    | 369                    | 323                        | 196                        |
| United Kingdom              | 1,120        | 120,528          | 245                    | 322                    | 368                    | 322                        | 196                        |
| Italy                       | 926          | 91,101           | 245                    | 322                    | 367                    | 322                        | 195                        |
| Switzerland                 | 618          | 13,468           | 241                    | 315                    | 359                    | 315                        | 193                        |
| France                      | 374          | 137,377          | 245                    | 322                    | 368                    | 322                        | 196                        |
| Austria†                    | 82           | 13,018           | 241                    | 315                    | 359                    | 315                        | 193                        |
| The Netherlands†            | 81           | 30,010           | 244                    | 319                    | 364                    | 319                        | 195                        |
| <b>Northern Europe</b>      | 2,820        | Not known        | 246                    | 323                    | 369                    | 323                        | 196                        |
| Norway                      | 1,228        | 10,037           | 240                    | 313                    | 356                    | 313                        | 192                        |
| Sweden                      | 887          | 18,628           | 243                    | 317                    | 362                    | 317                        | 194                        |
| Finland                     | 574          | 9,994            | 240                    | 313                    | 356                    | 313                        | 192                        |
| Iceland†                    | 71           | 749              | 185                    | 225                    | 247                    | 225                        | 155                        |
| <b>Eastern Europe</b>       | 2,342        | Not known        | 246                    | 323                    | 369                    | 323                        | 196                        |
| Russia                      | 1,008        | 299,438          | 246                    | 322                    | 368                    | 322                        | 196                        |
| Poland                      | 679          | 64,736           | 245                    | 321                    | 367                    | 321                        | 195                        |
| Croatia§                    | 286          | 6,866            | 237                    | 308                    | 350                    | 308                        | 190                        |
| Serbia¶                     | 220          | 10,933           | 240                    | 313                    | 357                    | 313                        | 192                        |
| Slovenia **                 | 149          | 3,658            | 230                    | 297                    | 335                    | 297                        | 186                        |
| <b>North America</b>        | 533          | Not known        | 246                    | 323                    | 369                    | 323                        | 196                        |
| USA§                        | 297          | 666,564          | 246                    | 323                    | 369                    | 323                        | 196                        |
| Canada††                    | 236          | 62,939           | 245                    | 321                    | 367                    | 321                        | 195                        |
| <b>South America¶¶</b>      | 346          | Not known        | 246                    | 323                    | 369                    | 323                        | 196                        |
| <b>Australia§§</b>          | 217          | 50,270           | 245                    | 321                    | 366                    | 321                        | 195                        |

Sample size calculations were performed in Epi Info™<sup>7</sup> available at: Center for DiseaseControl and Prevention (CDC), Epi Info. URL: <http://www.cdc.gov/epiinfo/>. Accessed 2013 Dec 31.

1  
2  
3 \*The population size indicates the number of live births in the country in two months (corresponds to the period of data collection) (cf. Appendix 3 for annual estimates of live  
4 births in each country). For the all regions except Australia, the population size is very large but not known exactly (i.e. infinite population). Infinite population size is  
5 therefore assumed in the calculation of the required sample size.

6 †The sample size allows for prevalence estimates with a precision of 9% (expected prevalence=80%), 10% (expected prevalence=70% and 30%), 11% (expected  
7 prevalence=60%) and 8% (expected prevalence=15%).

8 §The sample size allows for prevalence estimates with a precision of 6% (expected prevalence=70%, 60% and 30%).

9 ¶The sample size allows for prevalence estimates with a precision of 6% (expected prevalence=80%) and 7% (expected prevalence=70%, 60% and 30%).

10 \*\*The sample size allows for prevalence estimates with a precision of 7% (expected prevalence=80%), 8% (expected prevalence=70%, 60% and 30%) and 6% (expected  
11 prevalence=15%).

12 ††The sample size allows for prevalence estimates with a precision of 6% (expected prevalence=80%, 70% and 30%) and 7% (expected prevalence=60%).

13 ¶¶The sample size allows for prevalence estimates with a precision of 6% (expected prevalence=60%).

14 §§The sample size allows for prevalence estimates with a precision of 6% (expected prevalence=80%) and 7% (expected prevalence=70%, 60% and 30%).

**Appendix 5:** Overall medication use on 1<sup>st</sup> and 2<sup>nd</sup> ATC level according to timing of use in pregnancy (n=9,459)\*

| Anatomical Therapeutic Chemical (ATC) classification index<br>1 <sup>st</sup> and 2 <sup>nd</sup> levels |                                                                  | Anytime during<br>pregnancy<br>n (%) | 1 <sup>st</sup> trimester<br>n (%) | 2 <sup>nd</sup> trimester<br>n (%) | 3 <sup>rd</sup> trimester<br>n (%) |
|----------------------------------------------------------------------------------------------------------|------------------------------------------------------------------|--------------------------------------|------------------------------------|------------------------------------|------------------------------------|
| <b>A</b>                                                                                                 | <b>Alimentary tract and metabolism</b>                           | <b>4,275 (45.2)</b>                  | <b>2,786 (29.5)</b>                | <b>3,390 (35.8)</b>                | <b>3,160 (33.4)</b>                |
| A01                                                                                                      | Stomatological preparations                                      | 62 (0.7)                             | 42 (0.4)                           | 52 (0.5)                           | 46 (0.5)                           |
| A02                                                                                                      | Drugs for acid related disorders                                 | 3,242 (34.3)                         | 2,034 (21.5)                       | 2,634 (27.8)                       | 2,615 (27.6)                       |
| A03                                                                                                      | Drugs for functional gastrointestinal disorders                  | 650 (6.9)                            | 543 (5.7)                          | 512 (5.4)                          | 381 (4.0)                          |
| A04                                                                                                      | Antiemetics and antinauseants                                    | 136 (1.4)                            | 124 (1.3)                          | 114 (1.2)                          | 81 (0.9)                           |
| A05                                                                                                      | Bile and liver therapy                                           | 24 (0.3)                             | 15 (0.2)                           | 17 (0.2)                           | 16 (0.2)                           |
| A06                                                                                                      | Laxatives                                                        | 978 (10.3)                           | 696 (7.4)                          | 835 (8.8)                          | 735 (7.8)                          |
| A07                                                                                                      | Antidiarrheals, intestinal antiinflammatory/antiinfective agents | 89 (0.9)                             | 61 (0.6)                           | 69 (0.7)                           | 57 (0.6)                           |
| A09                                                                                                      | Digestives, incl. enzymes                                        | 9 (0.1)                              | 7 (0.1)                            | 8 (0.1)                            | 3 (0.0)                            |
| A10                                                                                                      | Drugs used in diabetes                                           | 85 (0.9)                             | 57 (0.6)                           | 58 (0.6)                           | 45 (0.5)                           |
| -                                                                                                        | Unspecified medications for nausea                               | 6 (0.1)                              | 5 (0.1)                            | 4 (0.0)                            | 3 (0.0)                            |
| <b>B</b>                                                                                                 | <b>Blood and blood forming organs</b>                            | <b>148 (1.6)</b>                     | <b>89 (0.9)</b>                    | <b>102 (1.1)</b>                   | <b>79 (0.8)</b>                    |
| B01                                                                                                      | Antithrombotic agents                                            | 135 (1.4)                            | 78 (0.8)                           | 95 (1.0)                           | 72 (0.8)                           |
| B02                                                                                                      | Antihemorrhagics                                                 | 5 (0.1)                              | 4 (0.0)                            | 2 (0.0)                            | 3 (0.0)                            |
| B05                                                                                                      | Blood substitutes and perfusion solutions                        | 7 (0.1)                              | 5 (0.1)                            | 5 (0.1)                            | 2 (0.0)                            |
| B06                                                                                                      | Other hematological agents                                       | 3 (0.0)                              | 2 (0.0)                            | 2 (0.0)                            | 3 (0.0)                            |
| <b>C</b>                                                                                                 | <b>Cardiovascular system</b>                                     | <b>202 (2.1)</b>                     | <b>132 (1.4)</b>                   | <b>161 (1.7)</b>                   | <b>133 (1.4)</b>                   |
| C01                                                                                                      | Cardiac therapy                                                  | 7 (0.1)                              | 4 (0.0)                            | 5 (0.1)                            | 4 (0.1)                            |
| C02                                                                                                      | Antihypertensives                                                | 56 (0.6)                             | 34 (0.4)                           | 42 (0.4)                           | 31 (0.3)                           |
| C03                                                                                                      | Diuretics                                                        | 6 (0.1)                              | 5 (0.1)                            | 3 (0.0)                            | 2 (0.0)                            |
| C04                                                                                                      | Peripheral vasodilators                                          | 3 (0.0)                              | 3 (0.0)                            | 3 (0.0)                            | 3 (0.0)                            |
| C05                                                                                                      | Vasoprotectives                                                  | 44 (0.5)                             | 24 (0.3)                           | 35 (0.4)                           | 31 (0.3)                           |
| C07                                                                                                      | Beta blocking agents                                             | 74 (0.8)                             | 51 (0.5)                           | 59 (0.6)                           | 51 (0.5)                           |
| C08                                                                                                      | Calcium channel blockers                                         | 21 (0.2)                             | 16 (0.2)                           | 18 (0.2)                           | 13 (0.1)                           |
| C09                                                                                                      | Agents acting on the renin-angiotensin system                    | 4 (0.0)                              | 2 (0.0)                            | 2 (0.0)                            | 2 (0.0)                            |
| C10                                                                                                      | Lipid modifying agents                                           | 5 (0.1)                              | 3 (0.0)                            | 4 (0.0)                            | 4 (0.0)                            |
| -                                                                                                        | Unspecified medications for hypertension                         | 4 (0.0)                              | 3 (0.0)                            | 3 (0.0)                            | 2 (0.0)                            |

| Anatomical Therapeutic Chemical (ATC) classification index<br>1 <sup>st</sup> and 2 <sup>nd</sup> levels |                                                                        | Anytime during<br>pregnancy | 1 <sup>st</sup> trimester | 2 <sup>nd</sup> trimester | 3 <sup>rd</sup> trimester |
|----------------------------------------------------------------------------------------------------------|------------------------------------------------------------------------|-----------------------------|---------------------------|---------------------------|---------------------------|
|                                                                                                          |                                                                        | n (%)                       | n (%)                     | n (%)                     | n (%)                     |
| <b>D</b>                                                                                                 | <b>Dermatologicals</b>                                                 | <b>162 (1.7)</b>            | <b>116 (1.2)</b>          | <b>127 (1.3)</b>          | <b>103 (1.1)</b>          |
| D01                                                                                                      | <i>Antifungals for dermatological use</i>                              | 38 (0.4)                    | 28 (0.3)                  | 33 (0.3)                  | 27 (0.3)                  |
| D02                                                                                                      | Emollients and protectives                                             | 14 (0.1)                    | 11 (0.1)                  | 12 (0.1)                  | 10 (0.1)                  |
| D03                                                                                                      | Preparations for treatment of wounds and ulcers                        | 4 (0.0)                     | 3 (0.0)                   | 3 (0.0)                   | 3 (0.0)                   |
| D04                                                                                                      | Antipruritics, incl. antihistamines, anaesthetics, etc.                | 6 (0.1)                     | 3 (0.0)                   | 5 (0.1)                   | 4 (0.0)                   |
| D05                                                                                                      | Antipsoriatics                                                         | 3 (0.0)                     | 1 (0.0)                   | 1 (0.0)                   | 1 (0.0)                   |
| D06                                                                                                      | Antibiotics and chemotherapeutics for dermatological use               | 21 (0.2)                    | 15 (0.2)                  | 16 (0.2)                  | 13 (0.1)                  |
| D07                                                                                                      | <i>Corticosteroids, dermatological preparations</i>                    | 56 (0.6)                    | 40 (0.4)                  | 39 (0.4)                  | 31 (0.3)                  |
| D08                                                                                                      | Antiseptics and disinfectants                                          | 14 (0.1)                    | 9 (0.1)                   | 10 (0.1)                  | 9 (0.1)                   |
| D09                                                                                                      | Medicated dressings                                                    | 5 (0.1)                     | 5 (0.1)                   | 5 (0.1)                   | 3 (0.0)                   |
| D10                                                                                                      | Anti-acne preparations                                                 | 4 (0.0)                     | 4 (0.0)                   | 4 (0.0)                   | 2 (0.0)                   |
| D11                                                                                                      | Other dermatological preparations                                      | 1 (0.0)                     | -                         | 1 (0.0)                   | 1 (0.0)                   |
| -                                                                                                        | Unspecified medications for skin disorders                             | 5 (0.1)                     | 4 (0.0)                   | 4 (0.0)                   | 3 (0.0)                   |
| <b>G</b>                                                                                                 | <b>Genitourinary system and sex hormones</b>                           | <b>488 (5.2)</b>            | <b>318 (3.4)</b>          | <b>394 (4.2)</b>          | <b>303 (3.2)</b>          |
| G01                                                                                                      | <i>Gynaecological antiinfective and antiseptics</i>                    | 406 (4.3)                   | 255 (2.7)                 | 337 (3.6)                 | 258 (2.7)                 |
| G02                                                                                                      | Other gynecologicals                                                   | 13 (0.1)                    | 10 (0.1)                  | 10 (0.1)                  | 8 (0.1)                   |
| G03                                                                                                      | Sex hormones and modulators of the genital system                      | 68 (0.7)                    | 55 (0.6)                  | 50 (0.5)                  | 36 (0.4)                  |
| G04                                                                                                      | Urologicals                                                            | 12 (0.1)                    | 8 (0.1)                   | 7 (0.1)                   | 8 (0.1)                   |
| <b>H</b>                                                                                                 | <b>Systemic hormonal preparations, excl. sex hormones and insulins</b> | <b>486 (5.1)</b>            | <b>304 (3.2)</b>          | <b>346 (3.7)</b>          | <b>262 (2.8)</b>          |
| H01                                                                                                      | Pituitary and hypothalamic hormones and analogues                      | 4 (0.0)                     | 4 (0.0)                   | 3 (0.0)                   | 4 (0.0)                   |
| H02                                                                                                      | Corticosteroids for systemic use                                       | 93 (1.0)                    | 64 (0.7)                  | 78 (0.8)                  | 63 (0.7)                  |
| H03                                                                                                      | <i>Thyroid therapy</i>                                                 | 397 (4.2)                   | 242 (2.6)                 | 273 (2.9)                 | 201 (2.1)                 |
| <b>J</b>                                                                                                 | <b>Anti-infective for systemic use</b>                                 | <b>1,381 (14.6)</b>         | <b>874 (9.2)</b>          | <b>1,107 (11.7)</b>       | <b>943 (10.0)</b>         |
| J01                                                                                                      | <i>Antibacterials for systemic use</i>                                 | 1,325 (14.0)                | 840 (8.9)                 | 1,061 (11.2)              | 908 (9.6)                 |
| J02                                                                                                      | Antimycotics for systemic use                                          | 23 (0.2)                    | 16 (0.2)                  | 21 (0.2)                  | 17 (0.2)                  |
| J05                                                                                                      | Antivirals for systemic use                                            | 39 (0.4)                    | 27 (0.3)                  | 30 (0.3)                  | 26 (0.3)                  |
| J06                                                                                                      | Immune sera and immunoglobulins                                        | 4 (0.0)                     | 2 (0.0)                   | 3 (0.0)                   | 4 (0.0)                   |
| J07                                                                                                      | Vaccines                                                               | 10 (0.1)                    | 5 (0.1)                   | 8 (0.1)                   | 5 (0.1)                   |

| Anatomical Therapeutic Chemical (ATC) classification index<br>1 <sup>st</sup> and 2 <sup>nd</sup> levels |                                                            | Anytime during<br>pregnancy | 1 <sup>st</sup> trimester | 2 <sup>nd</sup> trimester | 3 <sup>rd</sup> trimester |
|----------------------------------------------------------------------------------------------------------|------------------------------------------------------------|-----------------------------|---------------------------|---------------------------|---------------------------|
|                                                                                                          |                                                            | n (%)                       | n (%)                     | n (%)                     | n (%)                     |
| <b>L</b>                                                                                                 | <b>Antineoplastic and immunomodulating agents</b>          | <b>134 (1.4)</b>            | <b>83 (0.9)</b>           | <b>117 (1.2)</b>          | <b>97 (1.0)</b>           |
| <b>L01</b>                                                                                               | Antineoplastic agents                                      | 4 (0.0)                     | 3 (0.0)                   | 4 (0.0)                   | 1 (0.0)                   |
| <b>L03</b>                                                                                               | Immunostimulants                                           | 96 (1.0)                    | 58 (0.6)                  | 86 (0.9)                  | 78 (0.8)                  |
| <b>L04</b>                                                                                               | Immunosuppressants                                         | 34 (0.4)                    | 22 (0.2)                  | 27 (0.3)                  | 18 (0.2)                  |
| <b>M</b>                                                                                                 | <b>Musculo-skeletal system</b>                             | <b>571 (6.0)</b>            | <b>416 (4.4)</b>          | <b>437 (4.6)</b>          | <b>380 (4.0)</b>          |
| <b>M01</b>                                                                                               | Antiinflammatory and antirheumatic products                | 515 (5.4)                   | 378 (4.0)                 | 396 (4.2)                 | 342 (3.6)                 |
| <b>M02</b>                                                                                               | Topical products for joint and muscular pain               | 54 (0.6)                    | 37 (0.4)                  | 41 (0.4)                  | 41 (0.4)                  |
| <b>M03</b>                                                                                               | Muscle relaxants                                           | 8 (0.1)                     | 8 (0.1)                   | 4 (0.0)                   | 1 (0.0)                   |
| <b>M05</b>                                                                                               | Drugs for treatment of bone diseases                       | 1 (0.0)                     | -                         | 1 (0.0)                   | -                         |
| <b>M09</b>                                                                                               | Other drugs for disorders of the musculo-skeletal system   | 2 (0.0)                     | 2 (0.0)                   | 2 (0.0)                   | 2 (0.0)                   |
| -                                                                                                        | Unspecified medications for headache                       | 2 (0.0)                     | 1 (0.0)                   | 1 (0.0)                   | 1 (0.0)                   |
| <b>N</b>                                                                                                 | <b>Nervous system</b>                                      | <b>5,441 (57.5)</b>         | <b>3,638 (38.5)</b>       | <b>4,247 (44.9)</b>       | <b>3,449 (36.5)</b>       |
| <b>N01</b>                                                                                               | Anaesthetics                                               | 13 (0.1)                    | 10 (0.1)                  | 7 (0.1)                   | 8 (0.1)                   |
| <b>N02</b>                                                                                               | Analgesics                                                 | 5,297 (56.0)                | 3,562 (37.7)              | 4,171 (44.1)              | 3,387 (35.8)              |
| <b>N03</b>                                                                                               | Antiepileptics                                             | 76 (0.8)                    | 46 (0.5)                  | 49 (0.5)                  | 42 (0.4)                  |
| <b>N05</b>                                                                                               | Psycholeptics                                              | 210 (2.2)                   | 173 (1.8)                 | 164 (1.7)                 | 138 (1.5)                 |
| <b>N06</b>                                                                                               | Psychoanaleptics                                           | 275 (2.9)                   | 211 (2.2)                 | 213 (2.3)                 | 179 (1.9)                 |
| <b>N07</b>                                                                                               | Other nervous system drugs                                 | 6 (0.1)                     | 4 (0.0)                   | 5 (0.1)                   | 3 (0.0)                   |
| -                                                                                                        | Unspecified analgesics/medications for the nervous system  | 52 (0.5)                    | 38 (0.4)                  | 43 (0.5)                  | 35 (0.4)                  |
| <b>P</b>                                                                                                 | <b>Antiparasitic products, insecticides and repellents</b> | <b>26 (0.3)</b>             | <b>20 (0.2)</b>           | <b>22 (0.2)</b>           | <b>16 (0.2)</b>           |
| <b>P01</b>                                                                                               | Antiprotozoals                                             | 25 (0.3)                    | 20 (0.2)                  | 22 (0.2)                  | 16 (0.2)                  |
| <b>P02</b>                                                                                               | Anthelmintics                                              | 1 (0.0)                     | -                         | -                         | -                         |
| <b>R</b>                                                                                                 | <b>Respiratory system</b>                                  | <b>2,609 (27.6)</b>         | <b>1,878 (19.9)</b>       | <b>2,047 (21.6)</b>       | <b>1,702 (18.0)</b>       |
| <b>R01</b>                                                                                               | Nasal preparations                                         | 1,547 (16.4)                | 1,079 (11.4)              | 1,229 (13.0)              | 1,046 (11.1)              |
| <b>R02</b>                                                                                               | Throat preparations                                        | 167 (1.8)                   | 110 (1.2)                 | 131 (1.4)                 | 122 (1.3)                 |
| <b>R03</b>                                                                                               | Drugs for obstructive airway diseases                      | 396 (4.2)                   | 269 (2.8)                 | 304 (3.2)                 | 242 (2.6)                 |
| <b>R05</b>                                                                                               | Cough and cold preparations                                | 152 (1.6)                   | 103 (1.1)                 | 125 (1.3)                 | 101 (1.1)                 |
| <b>R06</b>                                                                                               | Antihistamines for systemic use                            | 912 (9.6)                   | 777 (8.2)                 | 740 (7.8)                 | 580 (6.1)                 |



| Anatomical Therapeutic Chemical (ATC) classification index<br>1 <sup>st</sup> and 2 <sup>nd</sup> levels |                                                   | Anytime during<br>pregnancy<br>n (%) | 1 <sup>st</sup> trimester<br>n (%) | 2 <sup>nd</sup> trimester<br>n (%) | 3 <sup>rd</sup> trimester<br>n (%) |
|----------------------------------------------------------------------------------------------------------|---------------------------------------------------|--------------------------------------|------------------------------------|------------------------------------|------------------------------------|
| <b>R07</b>                                                                                               | Other respiratory system products                 | 3 (0.0)                              | 2 (0.0)                            | 3 (0.0)                            | 3 (0.0)                            |
| -                                                                                                        | Unspecified medications of the respiratory system | 142 (1.5)                            | 101 (1.1)                          | 118 (1.2)                          | 99 (1.0)                           |
| <b>S</b>                                                                                                 | <b>Sensory organs</b>                             | <b>45 (0.5)</b>                      | <b>33 (0.3)</b>                    | <b>38 (0.4)</b>                    | <b>28 (0.3)</b>                    |
| <b>S01</b>                                                                                               | <i>Ophthalmologicals</i>                          | 33 (0.3)                             | 24 (0.3)                           | 28 (0.3)                           | 23 (0.2)                           |
| <b>S02</b>                                                                                               | Otologicals                                       | 5 (0.1)                              | 3 (0.0)                            | 4 (0.0)                            | 2 (0.0)                            |
| <b>S03</b>                                                                                               | Ophthalmological and otological preparations      | 3 (0.0)                              | 2 (0.0)                            | 2 (0.0)                            | 2 (0.0)                            |
| -                                                                                                        | Unspecified medications for eye disorders         | 5 (0.1)                              | 4 (0.0)                            | 5 (0.1)                            | 2 (0.0)                            |
| <b>V</b>                                                                                                 | <b>Various</b>                                    | 15 (0.2)                             | 10 (0.1)                           | 11 (0.1)                           | 9 (0.1)                            |
| <b>Total medication use (any ATC)</b>                                                                    |                                                   | <b>7,678 (81.2)</b>                  | <b>4,710 (49.8)</b>                | <b>5,538 (58.5)</b>                | <b>4,663 (49.3)</b>                |

\*The most common medication groups within each ATC class are in italics. Exposure timing is defined as follows: 1<sup>st</sup> trimester (gestational weeks 0-12), 2<sup>nd</sup> trimester (gestational week 13-24), 3<sup>rd</sup> trimester (gestational week 25 and up to childbirth).

**Appendix 6:** Prevalence of acute/short-term illnesses and most common medications used at any time during pregnancy by ATC level, indication for use and region (n=9,459) \*†

| Prevalence of acute/short-term illnesses in pregnancy and related medication use, overall and by drug groups | REGION                             |                                     |                                    |                                 |                                 |                             | Total               |
|--------------------------------------------------------------------------------------------------------------|------------------------------------|-------------------------------------|------------------------------------|---------------------------------|---------------------------------|-----------------------------|---------------------|
|                                                                                                              | Western Europe<br>n=3,201<br>n (%) | Northern Europe<br>n=2,820<br>n (%) | Eastern Europe<br>n=2,342<br>n (%) | North America<br>n=533<br>n (%) | South America<br>n=346<br>n (%) | Australia<br>n=217<br>n (%) |                     |
| <b>Prevalence of headache</b>                                                                                | 1,699 (53.1)                       | 1,657 (58.8)                        | 1,138 (48.6)                       | 373 (70.0)                      | 197 (56.9)                      | 147 (67.7)                  | 5,211 (55.1)        |
| <b>Medication use for headache, total</b>                                                                    | <b>1,027 (32.1)</b>                | <b>1,057 (37.5)</b>                 | <b>522 (22.3)</b>                  | <b>226 (42.4)</b>               | <b>121 (35.0)</b>               | <b>109 (50.2)</b>           | <b>3,062 (32.4)</b> |
| <i>By drug group</i>                                                                                         |                                    |                                     |                                    |                                 |                                 |                             |                     |
| Paracetamol (incl. combinations) (N02BE)                                                                     | 994 (31.1)                         | 1,009 (35.8)                        | 372 (15.9)                         | 206 (38.6)                      | 92 (26.6)                       | 101 (46.5)                  | 2,774 (29.3)        |
| Non-steroidal antiinflammatory drugs (M01A)                                                                  | 28 (0.9)                           | 78 (2.8)                            | 37 (1.6)                           | 18 (3.0)                        | 18 (5.2)                        | 2 (0.9)                     | 179 (1.9)           |
| Acetylsalicylic acid (incl. combinations) (N02BA)                                                            | 7 (0.2)                            | 4 (0.1)                             | 81 (3.5)                           | 1 (0.2)                         | 4 (1.2)                         | 2 (0.9)                     | 99 (1.0)            |
| Opioid analgesics (N02A)                                                                                     | 14 (0.4)                           | 46 (1.6)                            | 3 (0.1)                            | 3 (0.6)                         | -                               | 13 (6.0)                    | 79 (0.8)            |
| Selective serotonin (5-HT <sub>1</sub> ) agonists (N02CC)                                                    | 6 (0.2)                            | 22 (0.8)                            | 2 (0.1)                            | 3 (0.6)                         | -                               | 1 (0.5)                     | 34 (0.4)            |
| <b>Prevalence of heartburn</b>                                                                               | 2,196 (68.6)                       | 1,875 (66.5)                        | 1,425 (60.8)                       | 374 (70.2)                      | 248 (71.7)                      | 141 (65.0)                  | 6,259 (66.2)        |
| <b>Medication use for heartburn, total</b>                                                                   | <b>984 (30.7)</b>                  | <b>885 (31.4)</b>                   | <b>525 (22.4)</b>                  | <b>202 (37.9)</b>               | <b>88 (25.4)</b>                | <b>72 (33.2)</b>            | <b>2,756 (29.1)</b> |
| <i>By drug group</i>                                                                                         |                                    |                                     |                                    |                                 |                                 |                             |                     |
| Antacids (aluminium, salts combinations, antifoam agents)                                                    | 384 (12.0)                         | 503 (17.8)                          | 440 (18.8)                         | 51 (9.6)                        | 63 (18.2)                       | 20 (9.2)                    | 1,461 (15.4)        |
| Alginic acid complex/sucralfate/bismuth (A02BX)                                                              | 569 (17.8)                         | 332 (11.8)                          | 86 (3.7)                           | 4 (0.8)                         | 3 (0.9)                         | 14 (6.5)                    | 1,008 (10.7)        |
| Proton pump inhibitors (A02BC)                                                                               | 77 (2.4)                           | 86 (3.0)                            | 4 (0.2)                            | 13 (2.4)                        | 3 (0.9)                         | 7 (3.2)                     | 190 (2.0)           |
| Antacid with calcium (A02AC)                                                                                 | 20 (0.6)                           | 13 (0.5)                            | 10 (0.4)                           | 123 (23.1)                      | 2 (0.6)                         | 9 (4.1)                     | 177 (1.9)           |
| H <sub>2</sub> receptor antagonists (A02BA)                                                                  | 27 (0.8)                           | 27 (1.0)                            | 7 (0.3)                            | 45 (8.4)                        | 5 (1.4)                         | 38 (17.5)                   | 149 (1.6)           |
| <b>Prevalence of pain</b>                                                                                    | 2,150 (67.2)                       | 2,067 (73.3)                        | 1,484 (63.4)                       | 369 (69.2)                      | 248 (71.7)                      | 157 (72.4)                  | 6,475 (68.5)        |
| <b>Medication use for pain, total</b>                                                                        | <b>533 (16.7)</b>                  | <b>426 (15.1)</b>                   | <b>147 (6.3)</b>                   | <b>110 (20.6)</b>               | <b>80 (23.1)</b>                | <b>59 (27.2)</b>            | <b>1,355 (14.3)</b> |
| <i>By drug group</i>                                                                                         |                                    |                                     |                                    |                                 |                                 |                             |                     |
| Paracetamol (incl. combinations) (N02BE)                                                                     | 444 (13.9)                         | 374 (13.3)                          | 65 (2.8)                           | 99 (18.6)                       | 44 (12.7)                       | 55 (25.3)                   | 1,081 (11.4)        |
| Non-steroidal antiinflammatory drugs (M01A)                                                                  | 19 (0.6)                           | 36 (1.3)                            | 21 (0.9)                           | 11 (2.1)                        | 24 (6.9)                        | 3 (1.4)                     | 114 (1.2)           |
| Opioid analgesics (N02A)                                                                                     | 39 (1.2)                           | 51 (1.8)                            | 2 (0.1)                            | 4 (0.8)                         | -                               | 12 (5.5)                    | 108 (1.1)           |

|                                                                                                                     | REGION              |                     |                     |                   |                   |                   |                     |
|---------------------------------------------------------------------------------------------------------------------|---------------------|---------------------|---------------------|-------------------|-------------------|-------------------|---------------------|
|                                                                                                                     | Western Europe      | Northern Europe     | Eastern Europe      | North America     | South America     | Australia         | Total               |
| <b>Prevalence of acute/short-term illnesses in pregnancy and related medication use, overall and by drug groups</b> | <b>n=3,201</b>      | <b>n=2,820</b>      | <b>n=2,342</b>      | <b>n=533</b>      | <b>n=346</b>      | <b>n=217</b>      | <b>n=9,459</b>      |
|                                                                                                                     | <i>n (%)</i>        | <i>n (%)</i>        | <i>n (%)</i>        | <i>n (%)</i>      | <i>n (%)</i>      | <i>n (%)</i>      | <i>n (%)</i>        |
| <b>Prevalence of nausea</b>                                                                                         | 2,324 (72.6)        | 2,244 (79.6)        | 1,503 (64.2)        | 409 (76.7)        | 238 (68.8)        | 173 (79.7)        | 6,891 (72.9)        |
| <b>Medication use for nausea, total</b>                                                                             | <b>413 (12.9)</b>   | <b>380 (13.5)</b>   | <b>140 (6.0)</b>    | <b>128 (24.0)</b> | <b>71 (20.5)</b>  | <b>39 (18.0)</b>  | <b>1,171 (12.4)</b> |
| <i>By drug group</i>                                                                                                |                     |                     |                     |                   |                   |                   |                     |
| First generation antihistamines (R06A)                                                                              | 150 (4.7)           | 259 (9.2)           | 21 (0.9)            | 84 (15.9)         | 9 (2.6)           | 4 (1.8)           | 527 (5.6)           |
| Metoclopramide/domperidone/bromopride (A03FA)                                                                       | 134 (4.2)           | 69 (2.4)            | 27 (1.2)            | 10 (1.9)          | 45 (13.0)         | 25 (11.5)         | 310 (3.3)           |
| Serotonin antagonists (A04AA)                                                                                       | 4 (0.1)             | 8 (0.3)             | 1 (0.0)             | 28 (5.3)          | 1 (0.3)           | 11 (5.1)          | 53 (0.6)            |
| <b>Prevalence of UTI</b>                                                                                            | 513 (16.0)          | 327 (11.6)          | 452 (19.3)          | 93 (17.4)         | 92 (26.6)         | 25 (11.5)         | 1,502 (15.9)        |
| <b>Medication use for UTI, total</b>                                                                                | <b>315 (9.8)</b>    | <b>221 (7.8)</b>    | <b>192 (8.2)</b>    | <b>56 (10.5)</b>  | <b>63 (18.2)</b>  | <b>17 (7.8)</b>   | <b>864 (9.1)</b>    |
| <i>By drug group</i>                                                                                                |                     |                     |                     |                   |                   |                   |                     |
| Unspecified penicillins (J01C-)                                                                                     | 94 (2.9)            | 99 (3.5)            | 46 (2.0)            | 16 (3.0)          | 17 (4.9)          | 1 (0.5)           | 273 (2.9)           |
| NOS Antibacterials for systemic use (J01-)                                                                          | 116 (3.6)           | 85 (3.0)            | 25 (1.1)            | 20 (3.8)          | 14 (4.0)          | 6 (2.8)           | 266 (2.8)           |
| Penicillins with extended spectrum +/- beta-lactamase inhibitors (J01CA/J01CR)                                      | 85 (2.7)            | 78 (2.8)            | 44 (1.9)            | 14 (2.6)          | 17 (4.9)          | 1 (0.5)           | 239 (2.5)           |
| Nitrofurantoin (J01XE)                                                                                              | 7 (0.2)             | 25 (0.9)            | 54 (2.3)            | 10 (1.9)          | 3 (0.9)           | 1 (0.5)           | 100 (1.1)           |
| Cephalosporins (J01D)                                                                                               | 20 (0.6)            | 10 (0.4)            | 36 (1.5)            | 2 (0.4)           | 11 (3.2)          | 6 (2.8)           | 85 (0.9)            |
| <b>Total prevalence of any acute/short-term illness</b>                                                             | <b>3,159 (98.7)</b> | <b>2,803 (99.4)</b> | <b>2,299 (98.2)</b> | <b>523 (98.1)</b> | <b>341 (98.6)</b> | <b>214 (98.6)</b> | <b>9,339 (98.7)</b> |
| <b>Total medication use for any acute/short-term illness</b>                                                        | <b>2,224 (69.5)</b> | <b>1,954 (69.3)</b> | <b>1,474 (62.9)</b> | <b>403 (75.6)</b> | <b>250 (72.3)</b> | <b>164 (75.6)</b> | <b>6,469 (68.4)</b> |

\*Countries are grouped into regions as shown in Figure 1.

†Sums of percentages do not add up to total medication use as only most common medication groups are presented. Rates do not include mineral supplements, vitamins, iron, and herbal or alternative medicine products.

Abbreviations: UTI: Urinary tract infection; NOS: Not otherwise specified.

**Appendix 7:** Prevalence of chronic/long-term disorders and most common medications used at any time during pregnancy by ATC level, indication for use and region (n=9,459) \*\*†

| Prevalence of chronic/long-term disorders in pregnancy and related medication use, overall and by drug groups | REGION                             |                                     |                                    |                                 |                                 |                             | Total            |
|---------------------------------------------------------------------------------------------------------------|------------------------------------|-------------------------------------|------------------------------------|---------------------------------|---------------------------------|-----------------------------|------------------|
|                                                                                                               | Western Europe<br>n=3,201<br>n (%) | Northern Europe<br>n=2,820<br>n (%) | Eastern Europe<br>n=2,342<br>n (%) | North America<br>n=533<br>n (%) | South America<br>n=346<br>n (%) | Australia<br>n=217<br>n (%) |                  |
| <b>Prevalence of hypothyroidism</b>                                                                           | 130 (4.1)                          | 118 (4.2)                           | 105 (4.5)                          | 22 (4.1)                        | 11 (3.2)                        | 6 (2.8)                     | 392 (4.1)        |
| <b>Medication use for hypothyroidism, total</b>                                                               | <b>118 (3.7)</b>                   | <b>113 (4.0)</b>                    | <b>96 (4.1)</b>                    | <b>21 (3.9)</b>                 | <b>9 (2.6)</b>                  | <b>6 (2.8)</b>              | <b>363 (3.8)</b> |
| <i>By drug group</i>                                                                                          |                                    |                                     |                                    |                                 |                                 |                             |                  |
| Thyroid hormone, levothyroxine (H03AA01)                                                                      | 117 (3.7)                          | 112 (4.0)                           | 89 (3.8)                           | 21 (3.9)                        | 9 (2.6)                         | 6 (2.8)                     | 354 (3.7)        |
| <b>Prevalence of asthma</b>                                                                                   | 163 (5.1)                          | 193 (6.8)                           | 58 (2.5)                           | 43 (8.1)                        | 12 (3.5)                        | 24 (11.1)                   | 493 (5.2)        |
| <b>Medication use for asthma, total</b>                                                                       | <b>122 (3.8)</b>                   | <b>133 (4.7)</b>                    | <b>38 (1.6)</b>                    | <b>35 (6.6)</b>                 | <b>8 (2.3)</b>                  | <b>24 (11.1)</b>            | <b>360 (3.8)</b> |
| <i>By drug group</i>                                                                                          |                                    |                                     |                                    |                                 |                                 |                             |                  |
| Inhalant selective beta-2 agonists (R03AC)                                                                    | 94 (2.9)                           | 66 (2.3)                            | 26 (1.1)                           | 32 (6.0)                        | 7 (2.0)                         | 24 (11.1)                   | 249 (2.6)        |
| Adrenergics and other drugs for COPD (R03AK)                                                                  | 33 (1.0)                           | 46 (1.6)                            | 10 (0.4)                           | 3 (0.6)                         | 2 (0.6)                         | 7 (3.2)                     | 101 (1.1)        |
| Inhalant glucocorticoids (R03BA)                                                                              | 28 (0.9)                           | 40 (1.4)                            | 13 (0.6)                           | 12 (2.3)                        | -                               | 4 (1.8)                     | 97 (1.0)         |
| Systemic selective beta-2 agonists (R03CC)                                                                    | -                                  | 30 (1.1)                            | -                                  | 2 (0.4)                         | -                               | -                           | 32 (0.3)         |
| <b>Prevalence of allergy</b>                                                                                  | 205 (6.4)                          | 372 (13.2)                          | 163 (7.0)                          | 51 (9.6)                        | 20 (5.8)                        | 23 (10.6)                   | 834 (8.8)        |
| <b>Medication use for allergy, total</b>                                                                      | <b>66 (2.1)</b>                    | <b>171 (6.1)</b>                    | <b>65 (2.8)</b>                    | <b>24 (4.5)</b>                 | <b>13 (3.8)</b>                 | <b>17 (7.8)</b>             | <b>356 (3.8)</b> |
| <i>By drug group</i>                                                                                          |                                    |                                     |                                    |                                 |                                 |                             |                  |
| Second generation antihistamines (R06A)                                                                       | 29 (0.9)                           | 104 (3.7)                           | 27 (1.2)                           | 17 (3.2)                        | 4 (1.2)                         | 5 (2.3)                     | 186 (2.0)        |
| Nasal corticosteroids (R01AD)                                                                                 | 11 (0.3)                           | 32 (1.1)                            | 17 (0.7)                           | -                               | -                               | 7 (3.2)                     | 67 (0.7)         |
| First generation antihistamines (R06A)                                                                        | 13 (0.4)                           | 29 (1.0)                            | 10 (0.4)                           | 9 (1.7)                         | 6 (1.7)                         | 4 (1.8)                     | 71 (0.8)         |
| <b>Prevalence of depression</b>                                                                               | 95 (3.0)                           | 144 (5.1)                           | 29 (1.2)                           | 52 (9.8)                        | 4 (1.2)                         | 25 (11.5)                   | 349 (3.7)        |
| <b>Medication use for depression, total</b>                                                                   | <b>61 (1.9)</b>                    | <b>100 (3.5)</b>                    | <b>11 (0.5)</b>                    | <b>29 (5.4)</b>                 | <b>1 (0.3)</b>                  | <b>23 (10.6)</b>            | <b>225 (2.4)</b> |
| <i>By drug group</i>                                                                                          |                                    |                                     |                                    |                                 |                                 |                             |                  |
| SSRI antidepressants (N06AB)                                                                                  | 44 (1.4)                           | 82 (2.9)                            | 6 (0.3)                            | 14 (2.6)                        | -                               | 14 (6.5)                    | 160 (1.7)        |
| SNRIs/mianserin/trazodone/mirtazapine/bupropion                                                               | 9 (0.3)                            | 11 (0.4)                            | 1 (0.0)                            | 15 (2.8)                        | -                               | 7 (3.2)                     | 43 (0.5)         |

|                                                                                                                      | REGION            |                   |                   |                   |                  |                  | Total               |
|----------------------------------------------------------------------------------------------------------------------|-------------------|-------------------|-------------------|-------------------|------------------|------------------|---------------------|
|                                                                                                                      | Western Europe    | Northern Europe   | Eastern Europe    | North America     | South America    | Australia        |                     |
| <b>Prevalence of chronic/long-term disorders in pregnancy and related medication use, overall and by drug groups</b> | <b>n=3,201</b>    | <b>n=2,820</b>    | <b>n=2,342</b>    | <b>n=533</b>      | <b>n=346</b>     | <b>n=217</b>     | <b>n=9,459</b>      |
|                                                                                                                      | <i>n (%)</i>      | <i>n (%)</i>      | <i>n (%)</i>      | <i>n (%)</i>      | <i>n (%)</i>     | <i>n (%)</i>     | <i>n (%)</i>        |
| Anxiolytics, benzodiazepine (N05BA)                                                                                  | 6 (0.2)           | 2 (0.1)           | 5 (0.2)           | -                 | -                | 1 (0.5)          | 14 (0.1)            |
| Antipsychotics quetiapine/olanzapine (N05AH)                                                                         | 2 (0.1)           | 4 (0.1)           | -                 | 3 (0.6)           | -                | 3 (1.4)          | 12 (0.1)            |
| <b>Total prevalence of any chronic/long-term disorder</b>                                                            | <b>617 (19.3)</b> | <b>831 (29.5)</b> | <b>576 (24.6)</b> | <b>154 (28.9)</b> | <b>51 (14.7)</b> | <b>72 (33.2)</b> | <b>2,301 (24.3)</b> |
| <b>Total medication use for any chronic/long-term disorder</b>                                                       | <b>462 (14.4)</b> | <b>593 (21.0)</b> | <b>322 (13.7)</b> | <b>119 (22.3)</b> | <b>38 (11.0)</b> | <b>70 (32.3)</b> | <b>1,604 (17.0)</b> |

\*Countries are grouped into regions as shown in Figure 1.

†Sums of percentages do not add up to total medication use as only most common medication groups are presented. Rates do not include mineral supplements, vitamins, iron, and herbal or alternative medicine products.

Abbreviations: COPD: Chronic obstructive pulmonary disease; SSRI: Selective serotonin re-uptake inhibitors; SNRI: Serotonin–noradrenaline reuptake inhibitors.

STROBE Statement—Checklist of items that should be included in reports of *cross-sectional studies*

|                              | Item No | Recommendation                                                                                                                                                                                                                                                                                                                                                                                           |
|------------------------------|---------|----------------------------------------------------------------------------------------------------------------------------------------------------------------------------------------------------------------------------------------------------------------------------------------------------------------------------------------------------------------------------------------------------------|
| <b>Title and abstract</b>    | 1       | <b>X</b> (a) Indicate the study's design with a commonly used term in the title or the abstract                                                                                                                                                                                                                                                                                                          |
|                              |         | <b>X</b> (b) Provide in the abstract an informative and balanced summary of what was done and what was found                                                                                                                                                                                                                                                                                             |
| <b>Introduction</b>          |         |                                                                                                                                                                                                                                                                                                                                                                                                          |
| Background/rationale         | 2       | <b>X</b> Explain the scientific background and rationale for the investigation being reported                                                                                                                                                                                                                                                                                                            |
| Objectives                   | 3       | <b>X</b> State specific objectives, including any prespecified hypotheses                                                                                                                                                                                                                                                                                                                                |
| <b>Methods</b>               |         |                                                                                                                                                                                                                                                                                                                                                                                                          |
| Study design                 | 4       | <b>X</b> Present key elements of study design early in the paper                                                                                                                                                                                                                                                                                                                                         |
| Setting                      | 5       | <b>X</b> Describe the setting, locations, and relevant dates, including periods of recruitment, exposure, follow-up, and data collection                                                                                                                                                                                                                                                                 |
| Participants                 | 6       | <b>X</b> (a) Give the eligibility criteria, and the sources and methods of selection of participants                                                                                                                                                                                                                                                                                                     |
| Variables                    | 7       | <b>X</b> Clearly define all outcomes, exposures, predictors, potential confounders, and effect modifiers. Give diagnostic criteria, if applicable                                                                                                                                                                                                                                                        |
| Data sources/<br>measurement | 8*      | <b>X</b> For each variable of interest, give sources of data and details of methods of assessment (measurement). Describe comparability of assessment methods if there is more than one group                                                                                                                                                                                                            |
| Bias                         | 9       | <b>X</b> Describe any efforts to address potential sources of bias                                                                                                                                                                                                                                                                                                                                       |
| Study size                   | 10      | <b>X</b> Explain how the study size was arrived at                                                                                                                                                                                                                                                                                                                                                       |
| Quantitative variables       | 11      | <b>X</b> Explain how quantitative variables were handled in the analyses. If applicable, describe which groupings were chosen and why                                                                                                                                                                                                                                                                    |
| Statistical methods          | 12      | <b>X</b> (a) Describe all statistical methods, including those used to control for confounding<br>(b) Describe any methods used to examine subgroups and interactions<br><b>X</b> (c) Explain how missing data were addressed<br>(d) If applicable, describe analytical methods taking account of sampling strategy<br>(e) Describe any sensitivity analyses                                             |
| <b>Results</b>               |         |                                                                                                                                                                                                                                                                                                                                                                                                          |
| Participants                 | 13*     | <b>X</b> (a) Report numbers of individuals at each stage of study—eg numbers potentially eligible, examined for eligibility, confirmed eligible, included in the study, completing follow-up, and analysed<br>(b) Give reasons for non-participation at each stage<br>(c) Consider use of a flow diagram                                                                                                 |
| Descriptive data             | 14*     | <b>X</b> (a) Give characteristics of study participants (eg demographic, clinical, social) and information on exposures and potential confounders<br>(b) Indicate number of participants with missing data for each variable of interest                                                                                                                                                                 |
| Outcome data                 | 15*     | <b>X</b> Report numbers of outcome events or summary measures                                                                                                                                                                                                                                                                                                                                            |
| Main results                 | 16      | <b>X</b> (a) Give unadjusted estimates and, if applicable, confounder-adjusted estimates and their precision (eg, 95% confidence interval). Make clear which confounders were adjusted for and why they were included<br><b>X</b> (b) Report category boundaries when continuous variables were categorized<br>(c) If relevant, consider translating estimates of relative risk into absolute risk for a |

|                          |    |                                                                                                                                                                              |
|--------------------------|----|------------------------------------------------------------------------------------------------------------------------------------------------------------------------------|
|                          |    | meaningful time period                                                                                                                                                       |
| Other analyses           | 17 | Report other analyses done—eg analyses of subgroups and interactions, and sensitivity analyses                                                                               |
| <b>Discussion</b>        |    |                                                                                                                                                                              |
| Key results              | 18 | ✗ Summarise key results with reference to study objectives                                                                                                                   |
| Limitations              | 19 | ✗ Discuss limitations of the study, taking into account sources of potential bias or imprecision. Discuss both direction and magnitude of any potential bias                 |
| Interpretation           | 20 | ✗ Give a cautious overall interpretation of results considering objectives, limitations, multiplicity of analyses, results from similar studies, and other relevant evidence |
| Generalisability         | 21 | ✗ Discuss the generalisability (external validity) of the study results                                                                                                      |
| <b>Other information</b> |    |                                                                                                                                                                              |
| Funding                  | 22 | ✗ Give the source of funding and the role of the funders for the present study and, if applicable, for the original study on which the present article is based              |

\*Give information separately for exposed and unexposed groups.

**Note:** An Explanation and Elaboration article discusses each checklist item and gives methodological background and published examples of transparent reporting. The STROBE checklist is best used in conjunction with this article (freely available on the Web sites of PLoS Medicine at <http://www.plosmedicine.org/>, Annals of Internal Medicine at <http://www.annals.org/>, and Epidemiology at <http://www.epidem.com/>). Information on the STROBE Initiative is available at [www.strobe-statement.org](http://www.strobe-statement.org).



**Medication use in pregnancy: a cross-sectional,  
multinational web-based study**

|                                    |                                                                                                                                                                                                                                                                                                                                                                                                                                                                                                                                                                                                                                                                                                                                                                                                                                                                                                                                                                                                                                                                                                                                                                                                                                                                                                                                                                                                                                                                                                                                                                                                                                                                                                                                                                                                                                                                                                                                                                                                                                                                   |
|------------------------------------|-------------------------------------------------------------------------------------------------------------------------------------------------------------------------------------------------------------------------------------------------------------------------------------------------------------------------------------------------------------------------------------------------------------------------------------------------------------------------------------------------------------------------------------------------------------------------------------------------------------------------------------------------------------------------------------------------------------------------------------------------------------------------------------------------------------------------------------------------------------------------------------------------------------------------------------------------------------------------------------------------------------------------------------------------------------------------------------------------------------------------------------------------------------------------------------------------------------------------------------------------------------------------------------------------------------------------------------------------------------------------------------------------------------------------------------------------------------------------------------------------------------------------------------------------------------------------------------------------------------------------------------------------------------------------------------------------------------------------------------------------------------------------------------------------------------------------------------------------------------------------------------------------------------------------------------------------------------------------------------------------------------------------------------------------------------------|
| Journal:                           | <i>BMJ Open</i>                                                                                                                                                                                                                                                                                                                                                                                                                                                                                                                                                                                                                                                                                                                                                                                                                                                                                                                                                                                                                                                                                                                                                                                                                                                                                                                                                                                                                                                                                                                                                                                                                                                                                                                                                                                                                                                                                                                                                                                                                                                   |
| Manuscript ID:                     | bmjopen-2013-004365.R2                                                                                                                                                                                                                                                                                                                                                                                                                                                                                                                                                                                                                                                                                                                                                                                                                                                                                                                                                                                                                                                                                                                                                                                                                                                                                                                                                                                                                                                                                                                                                                                                                                                                                                                                                                                                                                                                                                                                                                                                                                            |
| Article Type:                      | Research                                                                                                                                                                                                                                                                                                                                                                                                                                                                                                                                                                                                                                                                                                                                                                                                                                                                                                                                                                                                                                                                                                                                                                                                                                                                                                                                                                                                                                                                                                                                                                                                                                                                                                                                                                                                                                                                                                                                                                                                                                                          |
| Date Submitted by the Author:      | 20-Jan-2014                                                                                                                                                                                                                                                                                                                                                                                                                                                                                                                                                                                                                                                                                                                                                                                                                                                                                                                                                                                                                                                                                                                                                                                                                                                                                                                                                                                                                                                                                                                                                                                                                                                                                                                                                                                                                                                                                                                                                                                                                                                       |
| Complete List of Authors:          | <p>Lupattelli, Angela; University of Oslo, School of Pharmacy<br/>Spigset, Olav; St Olav's University Hospital, Department of Clinical<br/>Pharmacology; Children's and Women's Health, Norwegian University of<br/>Science and Technology, Department of Laboratory Medicine<br/>Twigg, Michael; University of East Anglia, School of Pharmacy<br/>Zagorodnikova, Ksenia; Northwest State Medical University n.a.I.I.<br/>Mechnikov, Northwest Medical Center for Drug Safety in Pregnancy &amp;<br/>Lactation<br/>Mårdby, Ann-Charlotte ; The Sahlgrenska Academy, University of<br/>Gothenburg, Department of Public Health and Community Medicine<br/>Moretti, Myla; The Hospital for Sick Children, University of Toronto, The<br/>Motherisk Program, Division of Clinical Pharmacology and Toxicology<br/>Drozd, Mariola; Medical University of Lublin, Faculty of Pharmacy<br/>Panchaud, Alice; University of Geneva and Lausanne, School of<br/>Pharmaceutical Sciences<br/>Hämeen-Anttila, Katri; Finnish Medicines Agency,<br/>Rieutord, Andre; APHP, GH HUPS, Hop Antoine Béclère,, Service<br/>Pharmacie, Clamart France and Européenne de Formation pour les<br/>Pharmaciens<br/>Gjergja Juraski, Romana; Children's Hospital Srebrnjak, Neuropediatric<br/>Unit<br/>Odalovic, Marina; Faculty of pharmacy, University of Belgrade, Department<br/>of Social Pharmacy and Pharmaceutical Legislation<br/>Kennedy, Debra; Royal Hospital for Women and University of NSW,<br/>MotherSafe<br/>Rudolf, Gorazd; University Medical Centre Ljubljana, Clinical Institute of<br/>Medical Genetics<br/>Juch, Herbert; Medical University of Graz, Research Unit Human<br/>Teratogens, Institute for Cell Biology, Histology and Embryology<br/>Passier, Anneke; Netherlands Pharmacovigilance Centre Lareb, Teratology<br/>Information Service (TIS),<br/>Björnsdóttir, Ingunn; University of Oslo, School of Pharmacy<br/>Nordeng, Hedvig; University of Oslo, School of Pharmacy; Norwegian<br/>Institute of Public Health, Division of Mental Health</p> |
| <b>Primary Subject<br>Heading</b>: | Obstetrics and gynaecology                                                                                                                                                                                                                                                                                                                                                                                                                                                                                                                                                                                                                                                                                                                                                                                                                                                                                                                                                                                                                                                                                                                                                                                                                                                                                                                                                                                                                                                                                                                                                                                                                                                                                                                                                                                                                                                                                                                                                                                                                                        |
| Secondary Subject Heading:         | Obstetrics and gynaecology, Pharmacology and therapeutics, Public health                                                                                                                                                                                                                                                                                                                                                                                                                                                                                                                                                                                                                                                                                                                                                                                                                                                                                                                                                                                                                                                                                                                                                                                                                                                                                                                                                                                                                                                                                                                                                                                                                                                                                                                                                                                                                                                                                                                                                                                          |
| Keywords:                          | Maternal medicine < OBSTETRICS, THERAPEUTICS, PUBLIC HEALTH                                                                                                                                                                                                                                                                                                                                                                                                                                                                                                                                                                                                                                                                                                                                                                                                                                                                                                                                                                                                                                                                                                                                                                                                                                                                                                                                                                                                                                                                                                                                                                                                                                                                                                                                                                                                                                                                                                                                                                                                       |



1  
2  
3  
4  
5  
6  
7  
8  
9  
10  
11  
12  
13  
14  
15  
16  
17  
18  
19  
20  
21  
22  
23  
24  
25  
26  
27  
28  
29  
30  
31  
32  
33  
34  
35  
36  
37  
38  
39  
40  
41  
42  
43  
44  
45  
46  
47  
48  
49  
50  
51  
52  
53  
54  
55  
56  
57  
58  
59  
60

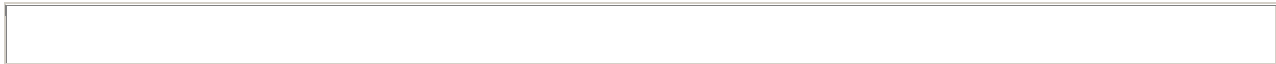

SCHOLARONE™  
Manuscripts

For peer review only

**Medication use in pregnancy: a cross-sectional, multinational web-based study**

Lupattelli A,<sup>1</sup> Spigset O,<sup>2,3</sup> Twigg MJ,<sup>4</sup> Zagorodnikova K,<sup>5</sup> Mårdby AC,<sup>6</sup> Moretti ME,<sup>7</sup> Drozd M,<sup>8</sup> Panchaud A,<sup>9</sup> Hämeen-Anttila K,<sup>10</sup> Rieutord A,<sup>11</sup> Gjergja Juraski R,<sup>12</sup> Odalovic M,<sup>13</sup> Kennedy D,<sup>14</sup> Rudolf G,<sup>15</sup> Juch H,<sup>16</sup> Passier A,<sup>17</sup> Björnsdóttir I,<sup>1</sup> Nordeng H<sup>1,18</sup>.

<sup>1</sup>*School of Pharmacy, University of Oslo, Norway*

<sup>2</sup>*Department of Clinical Pharmacology, St Olav's University Hospital, Trondheim, Norway*

<sup>3</sup>*Department of Laboratory Medicine, Children's and Women's Health, Norwegian University of Science and Technology, Trondheim, Norway*

<sup>4</sup>*School of Pharmacy, University of East Anglia, Norwich Research Park, United Kingdom*

<sup>5</sup>*Northwest Medical Center for Drug Safety in Pregnancy & Lactation, Northwest State Medical University n.a.I.I.Mechnikov, St. Petersburg, Russia*

<sup>6</sup>*Department of Public Health and Community Medicine, The Sahlgrenska Academy, University of Gothenburg, Gothenburg, Sweden*

<sup>7</sup>*The Motherisk Program, Division of Clinical Pharmacology and Toxicology, The Hospital for Sick Children, University of Toronto, Ontario, Canada*

<sup>8</sup>*Faculty of Pharmacy, Medical University of Lublin, Poland*

<sup>9</sup>*School of Pharmaceutical Sciences, University of Geneva and Lausanne, Geneva, Switzerland*

<sup>10</sup>*Finnish Medicines Agency, Kuopio, Finland*

<sup>11</sup>*APHP, GH HUPS, Hop Antoine Béclère, Service Pharmacie, Clamart France and Européenne de Formation pour les Pharmaciens, France*

<sup>12</sup>*Children's Hospital Srebrnjak, Neuropediatric Unit, Zagreb, Croatia*

<sup>13</sup>*Department of Social Pharmacy and Pharmaceutical Legislation, Faculty of pharmacy, University of Belgrade, Serbia*

<sup>14</sup>*MotherSafe, Royal Hospital for Women and University of NSW, Randwick, Australia*

<sup>15</sup>*Clinical Institute of Medical Genetics, University Medical Centre Ljubljana, Slovenia*

<sup>16</sup>*Research Unit Human Teratogens, Institute for Cell Biology, Histology and Embryology, Medical University of Graz, Austria*

<sup>17</sup>*Teratology Information Service (TIS), Netherlands Pharmacovigilance Centre Lareb, the Netherlands*

<sup>18</sup>*Division of Mental Health, Norwegian Institute of Public Health, Oslo, Norway*

**Corresponding author:**

Angela Lupattelli, MScPharm,

1  
2  
3  
4  
5  
6  
7  
8  
9  
10  
11  
12  
13  
14  
15  
16  
17  
18  
19  
20  
21  
22  
23  
24  
25  
26  
27  
28  
29  
30  
31  
32  
33  
34  
35  
36  
37  
38  
39  
40  
41  
42  
43  
44  
45  
46  
47  
48  
49  
50  
51  
52  
53  
54  
55  
56  
57  
58  
59  
60

Department of Pharmacy, School of Pharmacy, University of Oslo,  
PO Box 1068 Blindern, 0316 Oslo, Norway  
e-mail: angela.lupattelli@farmasi.uio.no; phone: +47 41343628 ; fax: +4722854402

**Key words:** pregnancy; drug utilization, maternal health; health behaviour; public health

**Word count** (excluding title page, abstract, references, figures and tables): 3637

For peer review only

## ABSTRACT

**Objectives:** Inter-country comparability between studies on medication use in pregnancy is difficult due to dissimilarities in study design and methodology. This study aimed to examine patterns and factors associated with medications use in pregnancy from a multinational perspective, with emphasis on type of medication utilized and indication for use.

**Design:** Cross-sectional, web-based study performed within the period from 1-Oct-2011 to 29-Feb-2012. Uniform collection of drug utilization data was performed via an anonymous online questionnaire.

**Setting:** Multinational study in Europe (Western, Northern, and Eastern), North and South America, and Australia.

**Participants:** Pregnant women and new mothers with children less than one year of age.

**Primary and secondary outcome measures:** Prevalence of and factors associated with medication use for acute/short-term illnesses, chronic/long-term disorders and over-the-counter (OTC) medication use.

**Results:** The study population included 9,459 women whereof 81.2% reported use of at least one medication (prescribed or OTC) during pregnancy. Overall, OTC medication use occurred in 66.9% of the pregnancies, whereas 68.4% and 17.0% of women reported use of at least one medication for treatment of acute/short-term illnesses and chronic/long-term disorders, respectively. The extent of self-reported

1  
2  
3 medicated illnesses and types of medication used by indication varied across regions,  
4  
5 especially in relation to urinary tract infections, depression or OTC nasal sprays.  
6

7 Women with higher age or lower educational level, housewives, or women with an  
8  
9 unplanned pregnancy were those most often reporting use of medication for  
10  
11 chronic/long-term disorders. Immigrant women in Western (aOR: 0.55, 95% CI: 0.34-  
12  
13 0.87) and Northern Europe (aOR: 0.50, 95% CI: 0.31-0.83) were less likely to report  
14  
15 use of medication for chronic/long-term disorders during pregnancy than non-  
16  
17 immigrants.  
18  
19

## 20 21 22 **Conclusions:**

23  
24 In this study, the majority of women in Europe, North America, South America and  
25  
26 Australia used at least one medication during pregnancy. There was a substantial  
27  
28 inter-region variability in the types of medication used.  
29  
30  
31  
32  
33  
34  
35  
36  
37  
38  
39  
40  
41  
42  
43  
44  
45  
46  
47  
48  
49  
50  
51  
52  
53  
54  
55  
56  
57  
58  
59  
60

## ARTICLE SUMMARY

### Strengths and limitations of this study

- Uniform data collection of drug utilization data across all participating countries allows for inter-country comparability of the prevalence of medication use during pregnancy, up to now impeded by differences in study design and methodology.
- The study adds a multinational perspective on OTC medication use during pregnancy to the limited number of studies quantifying the extent of self-medication during pregnancy.
- Lack of validity of the self-reported diagnoses is a limitation since all disorders and related medication use were self-reported by the study participants.
- A web-based survey as a study method impedes calculation of a conventional response rate and may cause selection bias of the target population.

## INTRODUCTION

Ethical reasons preclude inclusion of pregnant women in the vast majority of pre-marketing clinical trials.[1] As a consequence, most medications are placed onto the market without a directly established safety profile in human pregnancy.[2] So far, few medications have been shown to be major teratogens, yet the risk of minor teratogenicity or of more subtle effects on fetal development still have to be determined for most of them.[3] Despite this, medication use during pregnancy is common. Mitchell et al. found that use of medications, either prescribed or purchased over-the-counter (OTC), occurred in 88.8% of all pregnancies in the USA.[4] In Europe, prevalence estimates of prescribed medication use vary considerably across countries, ranging from 26% in Serbia to 93% in France.[5-10] Such inter-country variability could, at least in part, be caused by differences in study design, methodology and exposure ascertainment across studies.[11] Uniform collection of drug utilization data during pregnancy between countries may overcome such drawbacks, allowing for inter-country comparability of prevalence estimates and shedding light on differences in prenatal care in the various countries.

Prior studies have addressed research priorities in this area such as presenting results on an individual drug level according to the indication of use, quantifying the extent of OTC and prescribed medication use during pregnancy, and taking into account inter-country comparability.[4] Only a few studies have individually examined maternal factors associated with specific types of medication use during pregnancy.[11-14]

1  
2  
3 The objectives of the current study were to examine patterns of medication use in  
4 pregnancy from a multinational perspective, with special emphasis on type of  
5 medication utilized, including OTC medications, and self-reported indications for use,  
6 and to identify maternal background factors potentially associated with medication  
7 use for acute/short-term illnesses, medication use for chronic/long-term disorders and  
8 OTC medication use during pregnancy.  
9  
10  
11  
12  
13  
14  
15

## 16 17 **METHODS**

### 18 19 **Study design and data collection**

20 This is a multinational, cross-sectional, web-based study. Pregnant women at any  
21 gestational week and mothers with children less than one year of age were eligible to  
22 participate. Member countries of the European Network of Teratology Information  
23 Services (ENTIS), The Organization of Teratology Information Specialists (OTIS) in  
24 North America, MotherSafe in Australia and European institutions conducting public  
25 health research were invited to take part in the project. Of these, 18 countries  
26 participated (Australia, Austria, Canada, Croatia, Finland, France, Iceland, Italy,  
27 Netherlands, Norway, Poland, Russia, Serbia, Slovenia, Sweden, Switzerland, United  
28 Kingdom and USA). Data originating from some South and Central American  
29 countries were also collected through OTIS. Because of the low number of  
30 participants on the individual country level, the region of Central America was  
31 excluded and countries in South America were aggregated into one region. Data  
32 selection to achieve the final study sample was performed as depicted in Figure 1.  
33  
34  
35  
36  
37  
38  
39  
40  
41  
42  
43  
44  
45  
46  
47  
48  
49  
50  
51  
52  
53  
54  
55  
56  
57  
58  
59  
60



1  
2  
3 Data were collected through an anonymous on-line questionnaire administered by  
4 Quest Back (<http://www.questback.com>) and accessible for a period of two months in  
5 each participating country within the period 1-Oct-2011 to 29-Feb-2012. The  
6 questionnaire was open to the public via utilization of banners (invitations to  
7 participate in the study) on national websites and/or social networks commonly  
8 visited and consulted by pregnant women and/or new mothers. The complete  
9 questionnaire is presented in Appendix 1. Detailed information about recruitment  
10 tools utilized and internet penetration rates is summarized in Appendix 2.

11  
12 The questionnaire was first developed in Norwegian and English and then translated  
13 into the other relevant languages. A pilot study was carried out in September 2011  
14 (n=47) and elicited no major change to the questionnaire. Collected data were  
15 scrutinized for the presence of potential duplicates (based on reported country of  
16 residency, socio-demographic characteristics, date and exact time of questionnaire  
17 completion) but none were identified.

### 18 19 20 21 22 23 24 25 26 27 28 29 30 31 32 33 34 35 36 37 38 39 40 41 42 43 44 45 46 47 48 49 50 51 52 53 54 55 56 57 58 59 60

**Exposure variables**

Maternal socio-demographics (i.e. region of residency, age, educational level, mother tongue, working status at time of conception, previous children, marital status and unplanned pregnancy) and life-style characteristics (i.e. smoking status before and during pregnancy and alcohol consumption after awareness of pregnancy) constituted the exposure variables. To assess external validity, we compared socio-demographic and life-style characteristics of our study population on an individual country level with those of the general birthing population in the same country. Reports of National Statistics Bureaus or previous national studies were utilized for this purpose. The ratio

1  
2  
3 between the number of respondents and the estimated number of live births in the 2-  
4  
5 months period was also examined for each country (Appendix 3).  
6  
7

### 8 **Outcome variables**

9  
10 Use of any medication, medication for acute/short-term illnesses, medication for  
11  
12 chronic/long-term disorders and OTC medication use during pregnancy constituted  
13  
14 the outcome variables. Participants were first confronted with a list of the most  
15  
16 common acute/short-term illnesses (i.e. nausea, heartburn, constipation, common cold,  
17  
18 urinary tract infections (UTIs), other infections, pain in the neck/back/pelvic girdle,  
19  
20 headache, sleeping problems) and the most prevalent chronic/long-term disorders (i.e.  
21  
22 asthma, allergy, hypothyroidism, rheumatic disorders, diabetes, epilepsy, depression,  
23  
24 anxiety, cardiovascular disease, other disorders) and asked whether they suffered/had  
25  
26 suffered from these conditions during pregnancy. In case of an affirmative response,  
27  
28 women were questioned about medication use for each individual indication as a free-  
29  
30 text entry. Use of OTC medications was also recorded. Recall was aided with a list of  
31  
32 five OTC medication categories: painkillers, nasal spray/drops, antinauseants,  
33  
34 antacids and laxatives, along with examples of brand name products of relevance in  
35  
36 each country. It was optional to report timing of exposure for each of the medication  
37  
38 use questions (the alternatives were gestational weeks 0-12 (1<sup>st</sup> trimester), 13-24 (2<sup>nd</sup>  
39  
40 trimester) and 25-delivery (3<sup>rd</sup> trimester)).  
41  
42  
43  
44  
45  
46

47 We defined a medicine as a single product containing one or more active ingredients.  
48  
49 We initially identified the main active ingredient(s) and formulation of the reported  
50  
51 medicinal products either in the relevant national medicines database or in the  
52  
53 “Martindale” textbook.[15] All recorded medications were coded into the  
54  
55 corresponding Anatomical Therapeutic Chemical (ATC) codes at the ATC 5<sup>th</sup> level  
56  
57  
58  
59  
60

1  
2  
3 (i.e. the substance level) whenever possible, otherwise into the 2<sup>nd</sup>- 4<sup>th</sup> levels as  
4  
5 appropriate, in accordance with the World Health Organization ATC index.[16] The  
6  
7 OTC status of medications was crosschecked with the prescription policies within  
8  
9 each country. Whenever a prescription medication was reported under the OTC  
10  
11 question, this record was omitted from the analysis of OTC use but counted in the  
12  
13 estimation of total medication use (including prescription and OTC). Iron, mineral  
14  
15 supplements, vitamins, herbal remedies and any type of alternative medicine were  
16  
17 recorded separately and excluded from the estimation of medication use.  
18  
19

20  
21  
22 The required sample size calculation for the outcome variables on region and  
23  
24 individual country levels are outlined in Appendix 4. The expected prevalence  
25  
26 estimates were set according to results of previous studies.[5-10,17,18]  
27  
28

### 29 30 **Ethics**

31  
32 All participants gave informed consent by answering “Yes” to the question “Are you  
33  
34 willing to participate in the study?” The study was approved by the Regional Ethics  
35  
36 Committee, Region South-East in Norway. Ethical approval or study notification to  
37  
38 the relevant national Ethics Boards was achieved in specific countries as required by  
39  
40 national legislation. All data were handled and stored anonymously.  
41  
42

### 43 44 **Statistical analysis**

45  
46 Descriptive statistics were utilized as appropriate. Univariate and multivariate logistic  
47  
48 regression analyses were used to examine the association between maternal  
49  
50 characteristic and three categorical outcome measures (Yes/No): Medication use for  
51  
52 acute/short-term illnesses; medication use for chronic/long-term disorders; OTC  
53  
54 medication use. P-values of <0.05 were considered statistically significant. Data are  
55  
56  
57

1  
2  
3 presented as adjusted odds ratios (aOR) with 95% confidence intervals (CI). The  
4  
5 analyzed explanatory variables included all maternal socio-demographics and life-  
6  
7 style characteristics. After fitting the univariate logistic regression model for all  
8  
9 explanatory variables, the multivariate model was built and adjusted for all remaining  
10  
11 covariates. The Hosmer and Lemeshow test was used to assess goodness of fit of the  
12  
13 final multivariate model.[19] Analogue sub-analyses on individual region level were  
14  
15 performed. In these instances, region of residency was not included in the model. All  
16  
17 statistical analyses were performed by using the Statistical Package for the Social  
18  
19 Sciences (SPSS) version 20.0 (IBM® SPSS® Statistics).

## 22 23 24 **RESULTS**

### 25 26 **Population characteristics**

27  
28 A total of 9,615 women accessed the on-line questionnaire whereof 98.6% completed  
29  
30 it. The participant flow-chart to achieve final study population (n=9,459) is depicted  
31  
32 in Figure 1. A total of 5,089 women (53.8%) were pregnant at the time of completion  
33  
34 of the questionnaire, whereas 4,370 women (46.2%) had delivered their babies within  
35  
36 the previous year. Of the former group, 1,095 (21.5%), 1,702 (33.4%) and 2,291  
37  
38 (45.0%) women were in the first, second and third trimester of pregnancy,  
39  
40 respectively. Of the latter group, 1,320 (30.2%), 947 (21.7%) and 2,102 (48.1%) had a  
41  
42 baby of age  $\leq 16$  weeks, 17-28 weeks, and  $\geq 29$  weeks, respectively. For two women  
43  
44 the time of gestation/baby's age was unknown. Overall, the birthing population in  
45  
46 each participating country was reflected quite well by the sample with respect to age,  
47  
48 parity and smoking habits (Appendix 3). However, there was a difference in terms of  
49  
50 educational level; on average, the women in the study had higher education than the  
51  
52 general birthing population in each country. In addition, participants in Sweden,  
53  
54  
55  
56  
57  
58  
59  
60

1  
2  
3 Austria, Iceland and Italy were slightly more often primiparous, whereas the  
4  
5 responders in Australia, USA, The Netherlands, Slovenia and Croatia were somewhat  
6  
7 older than the general birthing population.  
8  
9

### 10 **Total medication use**

11  
12 After exclusion of vitamins, mineral supplements and iron, use of at least one  
13  
14 medication either prescribed or OTC at any time during pregnancy was reported by  
15  
16 7,678 out of 9,459 women (81.2%). Figure 2 depicts prevalence estimates of total  
17  
18 medication use during pregnancy by region and country of residence. The extent of  
19  
20 OTC medication use, as well as medication use for acute/short-term illnesses and  
21  
22 chronic/long-term disorders is also outlined. The highest prevalence of total  
23  
24 medication use during pregnancy was observed in The Netherlands (95.1%), Iceland  
25  
26 (93.0%) and Finland (92.3%). The overall prevalence estimates of medication use in  
27  
28 pregnancy according to timing and drug class (ATC level 1 and 2) are presented in  
29  
30 Appendix 5. Medications for the nervous system (ATC class N) were the most  
31  
32 commonly used during pregnancy (57.5%), mostly due to paracetamol  
33  
34 (acetaminophen) and its combinations.  
35  
36  
37  
38  
39

40  
41 A corollary analysis according to pregnancy status showed that pregnant women  
42  
43 reported in a significantly lower degree than new mothers any medication use during  
44  
45 pregnancy (78.8% vs. 84.0%, p-value<0.001), as well as OTC medication use (63.0%  
46  
47 vs. 71.5%, p-value<0.001) and medication use for acute/short-term illnesses (66.2%  
48  
49 vs. 70.9%, p-value<0.001). In contrast, the difference in medication use for  
50  
51 chronic/long-term disorders was not significant (17.4% vs. 16.5%, p-value=0.271).  
52  
53  
54 None of the rates differed significantly when women in the third trimester of  
55  
56 pregnancy were compared to new mothers.  
57  
58  
59  
60

### Medication use according to indication

Headache, heartburn, pain, nausea and UTIs constituted the leading indications for use of medication during pregnancy among the acute/short-term illnesses analyzed. Hypothyroidism, asthma, allergy and depression were the leading indications for chronic/long-term medication use. Observed prevalence rates of these disorders, overall and by region of residency, are presented in Appendices 6 and 7, respectively, along with rates of total and specific medication use. Table 1 outlines prevalence estimates of OTC medication use during pregnancy by region and indication for use. Only the most common medication groups reported are presented. Inter-region variations in rates and types of medication used during pregnancy were observed both for acute/short-term illnesses (e.g. nausea and UTIs), chronic/long-term disorders (e.g. asthma and depression) and OTC medications (e.g. nasal spray).

### Factors associated with medication use

Factors associated with medication use during pregnancy according to type of medication utilized are presented in table 2. Use of chronic/long-term medications during pregnancy was reported in a significant larger extent by women in Northern Europe (aOR: 1.68, 95% CI: 1.46-1.94), North America (aOR: 1.80, 95% CI: 1.42-2.28) and Australia (aOR: 2.76, 95% CI: 2.03-3.76) compared to women in Western Europe. Older women or housewives, those with low education or with an unplanned pregnancy, were the ones most often reporting use of chronic/long-term medication. Sub-analysis on individual region level revealed that women not having the official language of the country of residency as mother tongue were less likely to report chronic/long-term medication use in Western (aOR: 0.55, 95% CI: 0.34-0.87) and Northern Europe (aOR: 0.50, 95% CI: 0.31-0.83), but not in the other regions.

**Table 1:** Use of OTC medication at any time during pregnancy by ATC level, indication for use and region (n=9,459) <sup>\*†</sup>

| OTC medication use, overall and by drug groups           | REGION              |                     |                   |                   |                   |                   | Total               |
|----------------------------------------------------------|---------------------|---------------------|-------------------|-------------------|-------------------|-------------------|---------------------|
|                                                          | Western Europe      | Northern Europe     | Eastern Europe    | North America     | South America     | Australian        |                     |
|                                                          | n=3,201             | n=2,820             | n=2,342           | n=533             | n=346             | n=217             | n=9,459             |
|                                                          | n (%)               | n (%)               | n (%)             | n (%)             | n (%)             | n (%)             | n (%)               |
| <b>OTC painkillers, total</b>                            | <b>1,714 (53.5)</b> | <b>1,773 (62.9)</b> | <b>734 (31.3)</b> | <b>284 (53.3)</b> | <b>127 (36.7)</b> | <b>151 (69.9)</b> | <b>4,783 (50.6)</b> |
| <i>By drug group</i>                                     |                     |                     |                   |                   |                   |                   |                     |
| Paracetamol (incl. combinations) (N02BE)                 | 1,655 (51.7)        | 1,735 (61.5)        | 630 (26.9)        | 263 (49.3)        | 87 (25.1)         | 146 (67.3)        | 4,516 (47.7)        |
| Non-steroidal antiinflammatory drugs (M01A)              | 70 (2.2)            | 182 (6.5)           | 68 (2.9)          | 40 (7.5)          | 59 (17.1)         | 7 (3.2)           | 426 (4.5)           |
| Acetylsalicylic acid (incl. combinations) (N02BA)        | 7 (0.2)             | 11 (0.4)            | 32 (1.4)          | 2 (0.4)           | 2 (0.6)           | 1 (0.5)           | 55 (0.6)            |
| Metamizole (N02BB02)                                     | -                   | 6 (0.2)             | 31 (1.3)          | 1 (0.2)           | 12 (3.5)          | -                 | 50 (0.5)            |
| <b>OTC antacids, total</b>                               | <b>1,011 (31.6)</b> | <b>883 (31.3)</b>   | <b>583 (24.9)</b> | <b>129 (24.2)</b> | <b>48 (13.9)</b>  | <b>76 (35.0)</b>  | <b>2,730 (28.9)</b> |
| <i>By drug group</i>                                     |                     |                     |                   |                   |                   |                   |                     |
| Antacids (aluminium, salts combinations, antiflatulents) | 472 (14.7)          | 550 (19.5)          | 508 (21.7)        | 47 (8.8)          | 36 (10.4)         | 54 (24.9)         | 1,667 (17.6)        |
| Alginic acid complex/sucralfate/bismuth (A02BX)          | 606 (18.9)          | 421 (14.9)          | 87 (3.7)          | 4 (0.8)           | 1 (0.3)           | 17 (7.8)          | 1,136 (12.0)        |
| H <sub>2</sub> receptor antagonists (A02BA)              | 20 (0.6)            | 20 (0.7)            | 16 (0.7)          | 57 (10.1)         | 10 (2.9)          | 17 (7.8)          | 137 (1.4)           |
| Antacids with calcium (A02AC)                            | 23 (0.7)            | 12 (0.4)            | 10 (0.4)          | 69 (12.9)         | 2 (0.6)           | 10 (4.6)          | 126 (1.3)           |
| Proton pump inhibitors (A02BC)                           | 38 (1.2)            | 52 (1.8)            | -                 | 10 (1.9)          | 2 (0.6)           | 5 (0.3)           | 107 (1.1)           |
| <b>OTC nasal sprays/drops, total</b>                     | <b>272 (8.5)</b>    | <b>742 (26.3)</b>   | <b>451 (19.3)</b> | <b>35 (6.6)</b>   | <b>7 (2.0)</b>    | <b>14 (6.5)</b>   | <b>1,521 (16.1)</b> |
| <i>By drug group</i>                                     |                     |                     |                   |                   |                   |                   |                     |
| Sympathomimetic nasal decongestants (R01AA/R01BB)        | 204 (6.4)           | 683 (24.2)          | 365 (15.6)        | 20 (3.8)          | 3 (0.9)           | 4 (1.8)           | 1,279 (13.5)        |
| Nasal corticosteroids (R01AD)                            | 31 (1.0)            | 49 (1.7)            | 12 (0.5)          | 5 (0.9)           | 2 (0.6)           | 10 (4.6)          | 109 (1.2)           |
| Nasal immunostimulants (low dose interferon) (L03A)      | -                   | -                   | 28 (1.2)          | -                 | -                 | -                 | 28 (0.3)            |
| <b>OTC laxatives, total</b>                              | <b>240 (7.5)</b>    | <b>227 (8.0)</b>    | <b>237 (10.1)</b> | <b>50 (9.4)</b>   | <b>8 (2.3)</b>    | <b>19 (8.8)</b>   | <b>781 (8.3)</b>    |
| <i>By drug group</i>                                     |                     |                     |                   |                   |                   |                   |                     |
| Osmotically acting laxatives (A06AD)                     | 159 (5.0)           | 171 (6.1)           | 197 (8.4)         | 2 (0.4)           | 2 (0.6)           | 8 (3.7)           | 539 (5.7)           |
| Contact laxatives (A06AB)                                | 28 (0.9)            | 44 (1.6)            | 18 (0.8)          | 7 (1.3)           | 6 (1.7)           | 2 (0.9)           | 105 (1.1)           |

| OTC medication use, overall and by drug groups | REGION              |                     |                     |                   |                   |                   | Total               |
|------------------------------------------------|---------------------|---------------------|---------------------|-------------------|-------------------|-------------------|---------------------|
|                                                | Western Europe      | Northern Europe     | Eastern Europe      | North America     | South America     | Australian        |                     |
|                                                | n=3,201             | n=2,820             | n=2,342             | n=533             | n=346             | n=217             | n=9,459             |
|                                                | <i>n (%)</i>        | <i>n (%)</i>        | <i>n (%)</i>        | <i>n (%)</i>      | <i>n (%)</i>      | <i>n (%)</i>      | <i>n (%)</i>        |
| Enemas (A06AG)                                 | 3 (0.1)             | 25 (0.9)            | 34 (1.5)            | 4 (0.8)           | -                 | 2 (0.9)           | 68 (0.7)            |
| Softeners, emollients (A06AA)                  | 8 (0.2)             | -                   | -                   | 38 (7.1)          | -                 | 6 (2.8)           | 52 (0.5)            |
| <b>OTC antinauseants, total</b>                | <b>263 (8.2)</b>    | <b>273 (9.7)</b>    | <b>41 (1.8)</b>     | <b>60 (11.3)</b>  | <b>28 (8.1)</b>   | <b>40 (18.4)</b>  | <b>705 (7.5)</b>    |
| <i>By drug group</i>                           |                     |                     |                     |                   |                   |                   |                     |
| First generation antihistamines (R06A)         | 141 (4.4)           | 256 (9.1)           | 7 (1.5)             | 55 (10.3)         | 5 (1.4)           | 5 (2.3)           | 469 (5.0)           |
| Metoclopramide/domperidone/bromopride (A03FA)  | 113 (3.5)           | 5 (0.2)             | 18 (0.8)            | 2 (0.4)           | 19 (5.5)          | 27 (12.4)         | 184 (1.9)           |
| <b>Total OTC medication use</b>                | <b>2,163 (67.6)</b> | <b>2,155 (76.4)</b> | <b>1,347 (57.5)</b> | <b>342 (64.2)</b> | <b>156 (45.1)</b> | <b>168 (77.4)</b> | <b>6,331 (66.9)</b> |

Abbreviations: OTC: Over-The-Counter medications.

\*Countries are grouped into regions as shown in Figure 1.

†Sums of percentages do not add up to total medication use as only most common medication groups are presented. Rates do not include mineral supplements, vitamins, iron, and herbal or alternative medicine products.



**Table 2:** Factors associated with medication use in pregnancy (n=9,459)\*

|                                        | Medication use                              |                         |                                              |                         |                  |                         |
|----------------------------------------|---------------------------------------------|-------------------------|----------------------------------------------|-------------------------|------------------|-------------------------|
|                                        | For acute/short-term illnesses<br>(n=6,469) |                         | For chronic/long-term disorders<br>(n=1,604) |                         | OTC<br>(n=6,331) |                         |
|                                        | n (%)                                       | aOR (95% CI)            | n (%)                                        | aOR (95% CI)            | n (%)            | aOR (95% CI)            |
| <b>Region of residency<sup>†</sup></b> |                                             |                         |                                              |                         |                  |                         |
| Western Europe                         | 2,224 (69.5)                                | Reference               | 462 (14.4)                                   | Reference               | 2,163 (67.6)     | Reference               |
| Northern Europe                        | 1,954 (69.3)                                | 0.96 (0.86-1.08)        | 593 (21.0)                                   | <b>1.68 (1.46-1.94)</b> | 2,155 (76.4)     | <b>1.54 (1.36-1.74)</b> |
| Eastern Europe                         | 1,474 (62.9)                                | <b>0.69 (0.61-0.78)</b> | 322 (13.7)                                   | 1.03 (0.87-1.21)        | 1,347 (57.5)     | <b>0.60 (0.53-0.67)</b> |
| North America                          | 403 (75.6)                                  | <b>1.28 (1.03-1.60)</b> | 119 (22.3)                                   | <b>1.80 (1.42-2.28)</b> | 342 (64.2)       | <b>0.81 (0.66-0.99)</b> |
| South America                          | 250 (82.3)                                  | 1.03 (0.79-1.34)        | 38 (11.0)                                    | 0.70 (0.48-1.01)        | 156 (45.1)       | <b>0.34 (0.27-0.44)</b> |
| Australia                              | 164 (75.6)                                  | 1.29 (0.93-1.79)        | 70 (32.3)                                    | <b>2.76 (2.03-3.76)</b> | 168 (77.4)       | <b>1.57 (1.12-2.20)</b> |
| <b>Maternal age (years)</b>            |                                             |                         |                                              |                         |                  |                         |
| ≤20                                    | 232 (70.5)                                  | 1.22 (0.93-1.60)        | 761 (14.7)                                   | <b>0.58 (0.39-0.87)</b> | 205 (62.3)       | 1.05 (0.81-1.36)        |
| 21-30                                  | 3,531 (68.2)                                | Reference               | 33 (10.0)                                    | Reference               | 3,461 (66.8)     | Reference               |
| 31-40                                  | 2,576 (68.6)                                | 0.90 (0.82-1.00)        | 764 (20.4)                                   | <b>1.44 (1.27-1.63)</b> | 2,531 (67.4)     | <b>0.85 (0.77-0.94)</b> |
| ≥41                                    | 130 (66.3)                                  | 0.73 (0.54-1.00)        | 46 (23.5)                                    | <b>1.61 (1.13-2.29)</b> | 134 (68.4)       | 0.86 (0.62-1.19)        |
| <b>Previous children</b>               |                                             |                         |                                              |                         |                  |                         |
| No                                     | 3,082 (65.5)                                | Reference               | 735 (15.6)                                   | Reference               | 2,949 (62.6)     | Reference               |
| Yes                                    | 3,387 (71.3)                                | <b>1.34 (1.22-1.47)</b> | 869 (18.3)                                   | 1.08 (0.96-1.21)        | 3,382 (71.2)     | <b>1.58 (1.44-1.74)</b> |
| <b>Marital status</b>                  |                                             |                         |                                              |                         |                  |                         |
| Married/cohabiting                     | 6,066 (68.5)                                | Reference               | 1,503 (17.0)                                 | Reference               | 5,960 (67.3)     | Reference               |
| Single/divorced/others                 | 403 (66.3)                                  | 0.91 (0.75-1.10)        | 101 (16.6)                                   | 1.06 (0.83-1.35)        | 371 (61.0)       | 0.91 (0.75-1.10)        |
| <b>Working status</b>                  |                                             |                         |                                              |                         |                  |                         |
| Employed, but not as HCP               | 3,737 (66.8)                                | Reference               | 905 (16.2)                                   | Reference               | 3,667 (65.6)     | Reference               |
| HCP                                    | 934 (74.4)                                  | <b>1.41 (1.23-1.63)</b> | 240 (19.1)                                   | 1.13 (0.96-1.33)        | 944 (75.2)       | <b>1.42 (1.23-1.64)</b> |
| Student                                | 592 (69.1)                                  | 1.11 (0.94-1.31)        | 128 (14.9)                                   | 1.04 (0.84-1.30)        | 578 (67.4)       | 1.10 (0.93-1.30)        |
| Housewife                              | 608 (72.6)                                  | 1.14 (0.96-1.35)        | 170 (20.3)                                   | <b>1.34 (1.10-1.63)</b> | 577 (68.9)       | 1.05 (0.88-1.24)        |
| Job seeker                             | 281 (66.0)                                  | 0.96 (0.78-1.20)        | 66 (15.5)                                    | 1.03 (0.78-1.36)        | 258 (60.6)       | 0.85 (0.68-1.05)        |
| Other than above                       | 311 (65.2)                                  | 0.91 (0.75-1.12)        | 94 (19.7)                                    | <b>1.29 (1.01-1.65)</b> | 302 (63.3)       | 0.91 (0.74-1.12)        |
| <b>Educational level</b>               |                                             |                         |                                              |                         |                  |                         |

|                                                                                             | Medication use                              |                         |                                              |                         |                  |                         |
|---------------------------------------------------------------------------------------------|---------------------------------------------|-------------------------|----------------------------------------------|-------------------------|------------------|-------------------------|
|                                                                                             | For acute/short-term illnesses<br>(n=6,469) |                         | For chronic/long-term disorders<br>(n=1,604) |                         | OTC<br>(n=6,331) |                         |
|                                                                                             | n (%)                                       | aOR (95% CI)            | n (%)                                        | aOR (95% CI)            | n (%)            | aOR (95% CI)            |
| Less than high school                                                                       | 331 (72.7)                                  | 1.17 (0.93-1.49)        | 92 (20.2)                                    | <b>1.51 (1.15-1.97)</b> | 317 (69.7)       | <b>1.32 (1.04-1.67)</b> |
| High school                                                                                 | 1,864 (68.7)                                | Reference               | 428 (15.8)                                   | Reference               | 1,779 (65.6)     | Reference               |
| More than high school                                                                       | 3,574 (68.4)                                | 0.99 (0.89-1.11)        | 916 (17.5)                                   | 1.04 (0.91-1.20)        | 3,489 (66.8)     | 1.07 (0.96-1.19)        |
| Others, unspecified                                                                         | 700 (65.7)                                  | 0.82 (0.70-0.96)        | 168 (15.8)                                   | 0.94 (0.77-1.16)        | 746 (70.0)       | 1.13 (0.97-1.33)        |
| <b>Alcohol use after awareness of pregnancy</b>                                             |                                             |                         |                                              |                         |                  |                         |
| No                                                                                          | 5,270 (67.1)                                | Reference               | 1,322 (16.8)                                 | Reference               | 5,133 (65.3)     | Reference               |
| Yes                                                                                         | 1,144 (75.7)                                | <b>1.59 (1.39-1.81)</b> | 270 (17.9)                                   | 1.11 (0.95-1.29)        | 1,150 (76.1)     | <b>1.95 (1.71-2.23)</b> |
| <b>Smoking during pregnancy</b>                                                             |                                             |                         |                                              |                         |                  |                         |
| No                                                                                          | 5,835 (68.5)                                | Reference               | 1,441 (16.9)                                 | Reference               | 5,716 (67.0)     | Reference               |
| Yes, but less than before pregnancy                                                         | 530 (69.0)                                  | 1.08 (0.91-1.27)        | 130 (16.9)                                   | 1.01 (0.82-1.25)        | 511 (66.5)       | 1.06 (0.90-1.26)        |
| Yes, the same or more than before pregnancy                                                 | 88 (67.7)                                   | 0.95 (0.64-1.40)        | 28 (21.5)                                    | 1.19 (0.74-1.90)        | 89 (68.5)        | 1.21 (0.81-1.82)        |
| <b>Planned pregnancy</b>                                                                    |                                             |                         |                                              |                         |                  |                         |
| Yes                                                                                         | 5,836 (68.4)                                | Reference               | 1,427 (16.7)                                 | Reference               | 5,727 (67.2)     | Reference               |
| No                                                                                          | 616 (68.4)                                  | 0.96 (0.82-1.12)        | 173 (19.2)                                   | <b>1.29 (1.06-1.56)</b> | 587 (65.1)       | 1.00 (0.85-1.17)        |
| <b>First language different from the official main language in the country of residency</b> |                                             |                         |                                              |                         |                  |                         |
| No                                                                                          | 6,089 (68.5)                                | Reference               | 1,530 (17.2)                                 | Reference               | 5,972 (67.1)     | Reference               |
| Yes                                                                                         | 363 (67.2)                                  | 0.93 (0.76-1.12)        | 71 (13.1)                                    | <b>0.66 (0.50-0.86)</b> | 347 (64.3)       | 0.89 (0.74-1.08)        |

Abbreviation: HCP: health care provider.

\*Numbers may not add up due to missing values. Missing values are less than 5% of the total. Mineral supplements, vitamins, iron, herbal or alternative medicine products are not included in the medication use estimates.

†Countries are grouped into regions as shown in Figure 1.

## DISCUSSION

This is the first web-based study examining patterns and factors associated with medication use during pregnancy on a multinational level. In all regions, approximately eight out of ten women reported use of at least one medication, either prescribed or OTC, during the course of their pregnancy. This finding is in line with previous research conducted in Europe, North America, South America and Australia,[4,20-25] though our estimates were somewhat higher in some of the Eastern European countries, e.g. Serbia, than those observed in a previous study.[5] Different recruitment strategies, i.e. web-based in our study versus maternity care unit-/community pharmacy-based in the previous study could explain such discrepancy.

Overall, analgesics, antacids, nasal decongestants/antiallergics and systemic antibiotics were the medication groups dominating the drug utilization scenario, as also shown by previous research.[4,20-22] However, our study also provides insights into the proportion of medicated women among those suffering from a specific illness during pregnancy across the six regions. We found that approximately seven out of ten women who reported UTIs were treated with antibiotics during pregnancy. This related to all regions, except Eastern Europe where it was only four out of ten women. Since women may perceive dysuria without ascertainment of bacteriuria in the urine as UTI, an over-reporting of the illness could have occurred. Yet, a sub-optimal treatment of UTIs during pregnancy in Eastern Europe cannot be ruled out. The inter-country variability in the types of antibiotics used for UTIs could simply be explained by differences in prescribing practice,[26] presence of screening for bacteriuria in early pregnancy, or specific antibiotic resistance patterns.

Even though nausea was the condition affecting most women in all six regions, the corresponding proportions of medicated nausea were generally low. This scenario is probably

1  
2  
3 due to two main factors: a) the predominantly mild character of nausea and the possibility of  
4 non-pharmacological management (e.g. dietary advices); b) the reluctance of general  
5 practitioners to prescribe antinauseants even though safety profile assessments are in  
6 place.[27,28] As also shown in previous studies,[4,29] use of serotonin antagonists in North  
7 America and Australia is increasing also in pregnancy compared to the other regions, eliciting  
8 the need of sound studies assessing the safety profile of this drug group in pregnancy.  
9  
10  
11  
12  
13  
14  
15

16  
17 In most regions, the self-reported prevalence of hypothyroidism was somewhat higher than  
18 the reported hormone substitution rate. Because of its known association with adverse  
19 pregnancy outcomes,[30] the unexpected finding of potential sub-optimal treatment of  
20 hypothyroidism during pregnancy deserves attention. It could probably be due to a lack of  
21 information about hypothyroidism typology and its diagnostic ascertainment in our study.  
22  
23  
24  
25  
26  
27  
28

29 In our study, depression was self-reported and not based on any psychometric assessment,  
30 thus the observed substantial inter-regional variability in the extent of this disorder and related  
31 medication use could have certainly been affected by women's attitudes in reporting. Our  
32 estimate of medication use for depression in Australia was higher than that observed in a  
33 recent study (10.6% versus 2.1%).[31] However, the similarity in self-reported depression  
34 itself (11.5% versus 15.6%) suggests that our population might mostly comprise women who  
35 did not discontinue their pharmacological therapy once they became pregnant. Our estimates  
36 for North America and Western Europe were in line with recent literature showing an increase  
37 in antidepressant use in pregnancy during the last years.[4,32] Selective serotonin reuptake  
38 inhibitors (SSRIs) were the most widely used antidepressant class. Recent meta-analyses have  
39 shown that antidepressants, including SSRIs, do increase the risk of poor neonatal adaptation  
40 syndrome, specific cardiovascular malformations and persistent pulmonary hypertension of  
41 the newborn.[33-35] However, the clinical impact of the latter two outcomes, in absolute  
42  
43  
44  
45  
46  
47  
48  
49  
50  
51  
52  
53  
54  
55  
56  
57  
58  
59  
60

1  
2  
3 terms, is small and the risk of pharmacotherapy should always be weighted versus the risk of  
4  
5 undertreated depression in pregnancy.  
6  
7

8  
9 In most regions approximately 60-70% of women reported use of at least one OTC  
10  
11 medication during the course of their pregnancies, mostly for pain conditions, heartburn and  
12  
13 upper airways disorders, indicating a substantially high rate of self-medication during  
14  
15 pregnancy. This estimate aligns with previous research carried out in North America.[17] Of  
16  
17 note, self-medication with OTC sympathomimetic nasal decongestants was more extensive in  
18  
19 Northern and Eastern Europe than in the remaining regions; this could be explained by the  
20  
21 time of the year when the data collection was performed.  
22  
23

24  
25 Region of residency was an important factor associated with medication use during pregnancy.  
26  
27 As also shown by Cleary et al.,[36] we found that rates of medication use among women  
28  
29 originally from Eastern Europe and South America were significantly lower than those  
30  
31 observed in Western Europe, North America and Australia. Such geographical differences  
32  
33 could be due to culture, variations in prenatal care assistance or access to medications in the  
34  
35 various regions and the related costs.  
36  
37

38  
39 Women working as health care providers, consuming alcohol during pregnancy, or with  
40  
41 previous children were those more likely to use short-term and OTC medications, possibly  
42  
43 reflecting higher confidence in self-treatment and use of medications in general in the former  
44  
45 instance, and less anxiety for the pregnancy outcome in the latter two instances.  
46  
47

48  
49 Contrary to previous studies indicating an association between higher maternal education and  
50  
51 more prevalent use of medication during pregnancy,[14,17,23] we found that lower education  
52  
53 was associated with a higher use of OTC medications as well as medication for chronic/long-  
54  
55 term disorders (30-50% increased risk). Results of similar magnitude (30% increased risk)  
56  
57

1  
2  
3 were also observed by Olesen et al.[37], whereas Stokholm et al. [38] identified a stronger  
4  
5 association (2.3-fold increased risk) between low maternal education and use of antibiotic for  
6  
7 respiratory tract infections during pregnancy. One factor negatively associated with  
8  
9 chronic/long-term medication use was not having the official language of the country of  
10  
11 residency as mother tongue. This tendency was detected in Western and Northern Europe,  
12  
13 rising concerns about the potential health risks for immigrant women in these two regions. As  
14  
15 shown by Hämeen-Anttila et al., 57% of pregnant women have perceived information needs  
16  
17 about medications during pregnancy.[39] Thus, identification of potential users or non-users  
18  
19 of medication during pregnancy might be of clinical relevance. Indeed, this may allow  
20  
21 tailored evidence-based information about medication safety or outcome of sub-optimal  
22  
23 medication of severe medical conditions in pregnancy.  
24  
25  
26  
27

### 28 **Strengths and limitations**

29  
30 The main strength is that data collection was performed uniformly across all participating  
31  
32 countries, allowing for inter-country comparison of the prevalence of medication use during  
33  
34 pregnancy. By quantifying the extent of self-medication with OTC drugs and medication use  
35  
36 according to self-reported indication, it was possible to determine the leading causes for  
37  
38 medication use among pregnant women. Categorization of maternal characteristics positively  
39  
40 associated with the various types of medications used during pregnancy enabled us to identify  
41  
42 which groups of women are more likely to need information about medication use during  
43  
44 pregnancy. The utilization of an anonymous web-based questionnaire enabled us to reach a  
45  
46 large proportion of the birthing population in several countries worldwide. However, we  
47  
48 cannot exclude the possibility that the women who decided to participate in the study differed  
49  
50 from the general birthing population in other ways that our analysis could not control for. In  
51  
52 most participating countries the study sample was large enough to warrant calculation of  
53  
54  
55  
56  
57  
58  
59  
60

1  
2  
3 prevalence estimates with a precision of 5%. However, less precise estimates were permitted  
4  
5 by the study sample in Austria, Iceland and The Netherlands (precision of 9-11%), as well as  
6  
7 in Australia, Canada, Croatia, Serbia, Slovenia, and USA (precision of 6-7%).  
8  
9

10 One main limitation of the study is the lack of validity of the self-reported diagnoses. All  
11  
12 disorders were self-reported by the participants and hence dependent on the women's  
13  
14 perception of the medical condition. Similarly, information about medication use during  
15  
16 pregnancy was dependent on the accuracy of the women's reporting and recall. For new  
17  
18 mothers, data were registered retrospectively; hence a risk of recall bias cannot be ruled out.  
19  
20 In specific countries (Australia, Canada, France, Russia, The Netherlands, and USA) the study  
21  
22 sample was a small proportion of the general birthing population; hence the generalizability of  
23  
24 our findings for these specific countries should be interpreted with caution.  
25  
26  
27

28  
29 The questionnaire was only available through internet websites; by using this kind of  
30  
31 approach a conventional response rate cannot be calculated and a selection bias of the target  
32  
33 population cannot be ruled out. However, recent epidemiological studies indicate reasonable  
34  
35 validity of web-based recruitment methods.[40,41] Also, the penetration rate of the internet  
36  
37 either in households or at work is relatively high among women in childbearing age.[42-46]  
38  
39 Hence, the degree to which our findings can be extrapolated to the target population is based  
40  
41 on the representativeness of the respondents to the general birthing populations in each  
42  
43 country. The sample in each country had a somewhat higher educational level than the general  
44  
45 birthing populations. Such a limitation might have led to an underestimation of the prevalence  
46  
47 of medication during pregnancy. Since many ailments requiring pharmacotherapy occur in  
48  
49 mid or late pregnancy, inclusion of pregnant women at early gestation in the total material has  
50  
51 somewhat inflated the prevalence of non-users of medications during pregnancy. Also,  
52  
53 women with specific disorders or in need of information about medication use during  
54  
55  
56  
57  
58  
59  
60

1  
2  
3 pregnancy might have been more likely to consult internet websites and therefore participate  
4  
5 in this study.  
6  
7

## 8 **CONCLUSIONS**

9  
10 Use of medications for acute/short-term illnesses and chronic/long-term disorders as well as  
11 use of OTC medications, were common during pregnancy. The extent of medicated illnesses  
12 and types of medications used for the different indications varied across the six regions. This  
13 was especially relevant for acute/short-term illnesses such as nausea and UTIs, but also for  
14 chronic/long-term disorders such as hypothyroidism or depression. Women with higher age or  
15 lower educational level, housewives, or women with an unplanned pregnancy were those  
16 most often reporting chronic/long-term medication use, as opposed to immigrants residing in  
17 Western and Northern Europe who reported the least use of this medication category. Future  
18 research should definitely focus on this specific group of women, but also address more  
19 insights into the outcome of sub-optimal medication of severe conditions in pregnancy.  
20  
21  
22  
23  
24  
25  
26  
27  
28  
29  
30  
31  
32  
33  
34  
35  
36  
37  
38  
39  
40  
41  
42  
43  
44  
45  
46  
47  
48  
49  
50  
51  
52  
53  
54  
55  
56  
57  
58  
59  
60



**ACKNOWLEDGMENTS**

We thank OTIS, ENTIS Scientific Board who reviewed the study protocol and all website providers who contributed to the recruitment phase. We are grateful to all the participating women who took part in this study.

**FUNDING STATEMENT**

This work was supported by the Norwegian Research Council grant number 216771/F11 and by the Foundation for Promotion of Norwegian Pharmacies and the Norwegian Pharmaceutical Society.

**AUTHOR'S CONTRIBUTION:** AL, OS and HN conceived the idea for the study and participated in its design and coordination. AL drafted the manuscript and analyzed the data. MJT, KZ, ACM, MEM, MD, AP, KHA, AR, RGJ, MO, DK, GR, HJ, AP and IB contributed to the data collection. All authors contributed to the interpretation of the results and revised the manuscript critically for important intellectual content. All the authors read and approved the final manuscript.

**DATA SHARING STATEMENT:** No additional data are available. Researchers can apply for data access for subprojects within the overall aims of the main study 'The Multinational Medication Use in Pregnancy Study'.

**COMPETING INTERESTS:** None declared

**REFERENCES**

1. ACOG Committee Opinion No. 377: Research involving women. *Obstet Gynecol* 2007;**110**(3):731-6.
2. Adam MP, Polifka JE, Friedman JM. Evolving knowledge of the teratogenicity of medications in human pregnancy. *Am J Med Genet C Semin Med Genet* 2011;**157**(3):175-82.
3. Briggs GG, Freeman RK, Yaffe SJ. *Drugs in pregnancy and lactation*. [S.l.]: Lippincott Williams & Wilkins 2011.
4. Mitchell AA, Gilboa SM, Werler MM, et al. Medication use during pregnancy, with particular focus on prescription drugs: 1976-2008. *Am J Obstet Gynecol* 2011;**205**(1):51 e1-8.
5. Odalovic M, Vezmar Kovacevic S, Ilic K, et al. Drug use before and during pregnancy in Serbia. *Int J Clin Pharm* 2012;**34**(5):719-27.
6. Gagne JJ, Maio V, Berghella V, et al. Prescription drug use during pregnancy: a population-based study in Regione Emilia-Romagna, Italy. *Eur J Clin Pharmacol* 2008;**64**(11):1125-32.
7. Engeland A, Bramness JG, Daltveit AK, et al. Prescription drug use among fathers and mothers before and during pregnancy. A population-based cohort study of 106,000 pregnancies in Norway 2004-2006. *Br J Clin Pharmacol* 2008;**65**(5):653-60.
8. Bakker MK, Jentink J, Vroom F, et al. Drug prescription patterns before, during and after pregnancy for chronic, occasional and pregnancy-related drugs in the Netherlands. *BJOG* 2006;**113**(5):559-68.
9. Lacroix I, Hurault C, Sarramon MF, et al. Prescription of drugs during pregnancy: a study using EFEMERIS, the new French database. *Eur J Clin Pharmacol* 2009;**65**(8):839-46.
10. Malm H, Martikainen J, Klaukka T, et al. Prescription drugs during pregnancy and lactation--a Finnish register-based study. *Eur J Clin Pharmacol* 2003;**59**(2):127-33.

11. Daw JR, Hanley GE, Greyson DL, et al. Prescription drug use during pregnancy in developed countries: a systematic review. *Pharmacoepidemiol Drug Saf* 2011;**20**(9):895-902.
12. Rubin JD, Ferencz C, Loffredo C. Use of prescription and non-prescription drugs in pregnancy. *J Clin Epidemiol* 1993;**46**(6):581-89.
13. McKenna L, McIntyre M. What over-the-counter preparations are pregnant women taking? A literature review. *J Adv Nurs* 2006;**56**(6):636-45.
14. Odalovic M, Vezmar Kovacevic S, Nordeng H, et al. Predictors of the use of medications before and during pregnancy. *Int J Clin Pharm* 2013;**35**(3):408-16.
15. Martindale W, Sweetman SC. *Martindale : the complete drug reference*. London: Pharmaceutical Press, 2011.
16. WHO Collaborating Centre for Drugs Statistics Methodology. *Guidelines for ATC classification and DDD assignment 2013*. Oslo, 2012. Available at: [http://www.whocc.no/atc\\_ddd\\_index/](http://www.whocc.no/atc_ddd_index/). Accessed 17 March, 2012.
17. Refuerzo JS, Blackwell SC, Sokol RJ, et al. Use of Over-the-Counter Medications and Herbal Remedies in Pregnancy. *Amer J Perinatol* 2005;**22**(EFirst):321,24.
18. Sawicki E, Stewart K, Wong S, et al. Medication use for chronic health conditions by pregnant women attending an Australian maternity hospital. *Aust N Z J Obstet Gynaecol* 2011;**51**(4):333-38.
19. Hosmer DW, Lemeshow S. *Applied logistic regression*. New York: Wiley-Interscience 2000.
20. Nordeng H, Ystrøm E, Einarson A. Perception of risk regarding the use of medications and other exposures during pregnancy. *Eur J Clin Pharmacol* 2010;**66**(2):207-14.
21. Headley J, Northstone K, Simmons H, et al. Medication use during pregnancy: data from the Avon Longitudinal Study of Parents and Children. *Eur J Clin Pharmacol* 2004;**60**(5):355-61.

- 1  
2  
3 22. Medication during pregnancy: an intercontinental cooperative study. Collaborative Group  
4 on Drug Use in Pregnancy (C.G.D.U.P.). *Int J Gynaecol Obstet* 1992;**39**(3):185-96.  
5  
6  
7 23. Donati S, Baglio G, Spinelli A, et al. Drug use in pregnancy among Italian women. *Eur J*  
8  
9 *Clin Pharmacol* 2000;**56**(4):323-8.  
10  
11 24. Henry A, Crowther C. Patterns of medication use during and prior to pregnancy: the MAP  
12 study. *Aust N Z J Obstet Gynaecol* 2000;**40**(2):165-72.  
13  
14 25. Marín G, Cañas M, Homar C, et al. Uso de fármacos durante el período de gestación en  
15 embarazadas de Buenos Aires, Argentina. *Rev salud pública* 2010;**12**(5):722-31.  
16  
17 26. European Centre for Disease Prevention and Control. Surveillance of antimicrobial  
18 consumption in Europe, 2010. Stockholm: ECDC, 2013.  
19  
20 27. Smith J, Refuerzo J, Ramin S. Treatment and outcome of nausea and vomiting of  
21 pregnancy. In: Basow D, ed. UpToDate. Waltham, MA: UpToDate, 2013.  
22  
23 28. Gadsby R, Barnie-Adshead T, Sykes C. Why won't doctors prescribe antiemetics in  
24 pregnancy? *BMJ* 2011;**343**:d4387.  
25  
26 29. Raymond SH. A survey of prescribing for the management of nausea and vomiting in  
27 pregnancy in Australasia. *Aust N Z J Obstet Gynaecol* 2013;**53**(4):358-62.  
28  
29 30. Ross DS. Hypothyroidism during pregnancy: Clinical manifestations, diagnosis, and  
30 treatment. In: Basow DS, ed. UpToDate. Waltham, MA: UpToDate, 2013.  
31  
32 31. Lewis AJ, Bailey C, Galbally M. Anti-depressant use during pregnancy in Australia:  
33 findings from the Longitudinal Study of Australian Children. *Aust N Z J Public Health*  
34 2012;**36**(5):487-8.  
35  
36 32. Petersen I, Gilbert RE, Evans SJ, et al. Pregnancy as a major determinant for  
37 discontinuation of antidepressants: an analysis of data from The Health Improvement  
38 Network. *J Clin Psychiatry* 2011;**72**(7):979-85.  
39  
40  
41  
42  
43  
44  
45  
46  
47  
48  
49  
50  
51  
52  
53  
54  
55  
56  
57  
58  
59  
60

- 1  
2  
3 33. Grigoriadis S, VonderPorten EH, Mamisashvili L, et al. Antidepressant exposure during  
4 pregnancy and congenital malformations: Is there an association? A systematic review and  
5 meta-analysis of the best evidence. *J Clin Psychiatry* 2013;**74**(4):e293-e308.  
6  
7  
8  
9  
10 34. Grigoriadis S, Vonderporten EH, Mamisashvili L, et al. Prenatal exposure to  
11 antidepressants and persistent pulmonary hypertension of the newborn: systematic review and  
12 meta-analysis. *BMJ* 2014;**348**:f6932.  
13  
14  
15  
16 35. Grigoriadis S, VonderPorten EH, Mamisashvili L, et al. The effect of prenatal  
17 antidepressant exposure on neonatal adaptation: A systematic review and meta-analysis. *J*  
18 *Clin Psychiatry* 2013;**74**(4):e309-e20.  
19  
20  
21  
22  
23 36. Cleary BJ, Butt H, Strawbridge JD, et al. Medication use in early pregnancy-prevalence  
24 and determinants of use in a prospective cohort of women. *Pharmacoepidemiol Drug Saf*  
25 2010;**19**(4):408-17.  
26  
27  
28  
29  
30 37. Olesen C, Thrane N, Henriksen TB, et al. Associations between socio-economic factors  
31 and the use of prescription medication during pregnancy: a population-based study among  
32 19,874 Danish women. *Eur J Clin Pharmacol* 2006;**62**(7):547-53.  
33  
34  
35  
36 38. Stokholm J, Schjorring S, Pedersen L, et al. Prevalence and Predictors of Antibiotic  
37 Administration during Pregnancy and Birth. *PLoS One* 2013;**8**(12):e82932.  
38  
39  
40 39. Hämeen-Anttila K, Jyrkkä J, Enlund H, et al. Medicines information needs during  
41 pregnancy: a multinational comparison. *BMJ Open* 2013;**3**(4).  
42  
43  
44  
45 40. Ekman A, Dickman P, Klint Å, et al. Feasibility of Using Web-based Questionnaires in  
46 Large Population-based Epidemiological Studies. *Eur J Epidemiol* 2006;**21**(2):103-11.  
47  
48  
49 41. van Gelder MM, Bretveld RW, Roeleveld N. Web-based questionnaires: the future in  
50 epidemiology? *Am J Epidemiol* 2010;**172**(11):1292-8.  
51  
52  
53  
54  
55  
56  
57  
58  
59  
60

- 1  
2  
3 42. Seybert H. Internet use in households and by individuals in 2011. Eurostat Statistics in  
4 focus. 2011; Available at: [http://epp.eurostat.ec.europa.eu/cache/ITY\\_OFFPUB/KS-SF-11-066/EN/KS-SF-11-066-EN.PDF](http://epp.eurostat.ec.europa.eu/cache/ITY_OFFPUB/KS-SF-11-066/EN/KS-SF-11-066-EN.PDF). Accessed 13 November, 2012.
- 7  
8  
9 43. Internet World Stats. Usage and population statistics. 2012; Available at:  
10 <http://www.internetworldstats.com/>. Accessed 13 November, 2012.
- 11  
12  
13 44. Australian Bureau of Statistics. Household Use of Information Technology, Australia,  
14 2010-11. Available at: <http://www.abs.gov.au/ausstats/abs@.nsf/Latestproducts/8146.0MainFeatures12010-11?opendocument&tabname=Summary&prodno=8146.0&issue=2010-11&num=&view=>. Accessed 13 November, 2012.
- 20  
21  
22 45. Statistics Canada. Individual Internet use and E-commerce (2010). 2011; Available at:  
23 <http://www.statcan.gc.ca/daily-quotidien/111012/dq111012a-eng.htm>. Accessed 13  
24 November, 2012.
- 25  
26  
27 46. United States Census Bureau. The 2012 Statistical Abstract. Information &  
28 Communications: Internet Publishing and Broadcasting and Internet Usage. 2010; Available  
29 at:  
30 [http://www.census.gov/compendia/statab/cats/information\\_communications/internet\\_publishing\\_and\\_broadcasting\\_and\\_internet\\_usage.html](http://www.census.gov/compendia/statab/cats/information_communications/internet_publishing_and_broadcasting_and_internet_usage.html). Accessed 13 November, 2012.
- 31  
32  
33  
34  
35  
36  
37  
38  
39  
40  
41  
42  
43  
44  
45  
46  
47  
48  
49  
50  
51  
52  
53  
54  
55  
56  
57  
58  
59  
60

**Medication use in pregnancy: [a cross-sectional, multinational web-based study](#)  
a  
**multinational perspective****

Lupattelli A,<sup>1</sup> Spigset O,<sup>2,3</sup> Twigg MJ,<sup>4</sup> Zagorodnikova K,<sup>5</sup> Mårdby AC,<sup>6</sup> Moretti ME,<sup>7</sup> Drozd M,<sup>8</sup> Panchaud A,<sup>9</sup> Hämeen-Anttila K,<sup>10</sup> Rieutord A,<sup>11</sup> Gjergja Juraski R,<sup>12</sup> Odalovic M,<sup>13</sup> Kennedy D,<sup>14</sup> Rudolf G,<sup>15</sup> Juch H,<sup>16</sup> Passier A,<sup>17</sup> Björnsdóttir I,<sup>1</sup> Nordeng H<sup>1,18</sup>.

<sup>1</sup>*School of Pharmacy, University of Oslo, Norway*

<sup>2</sup>*Department of Clinical Pharmacology, St Olav's University Hospital, Trondheim, Norway*

<sup>3</sup>*Department of Laboratory Medicine, Children's and Women's Health, Norwegian University of Science and Technology, Trondheim, Norway*

<sup>4</sup>*School of Pharmacy, University of East Anglia, Norwich Research Park, United Kingdom*

<sup>5</sup>*Northwest Medical Center for Drug Safety in Pregnancy & Lactation, Northwest State Medical University n.a.I.I.Mechnikov, St. Petersburg, Russia*

<sup>6</sup>*Department of Public Health and Community Medicine, The Sahlgrenska Academy, University of Gothenburg, Gothenburg, Sweden*

<sup>7</sup>*The Motherisk Program, Division of Clinical Pharmacology and Toxicology, The Hospital for Sick Children, University of Toronto, Ontario, Canada*

<sup>8</sup>*Faculty of Pharmacy, Medical University of Lublin, Poland*

<sup>9</sup>*School of Pharmaceutical Sciences, University of Geneva and Lausanne, Geneva, Switzerland*

<sup>10</sup>*Finnish Medicines Agency, Kuopio, Finland*

<sup>11</sup>*APHP, GH HUPS, Hop Antoine Béclère, Service Pharmacie, Clamart France and Européenne de Formation pour les Pharmaciens, France*

<sup>12</sup>*Children's Hospital Srebrnjak, Neuropediatric Unit, Zagreb, Croatia*

<sup>13</sup>*Department of Social Pharmacy and Pharmaceutical Legislation, Faculty of pharmacy, University of Belgrade, Serbia*

<sup>14</sup>*MotherSafe, Royal Hospital for Women and University of NSW, Randwick, Australia*

<sup>15</sup>*Clinical Institute of Medical Genetics, University Medical Centre Ljubljana, Slovenia*

<sup>16</sup>*Research Unit Human Teratogens, Institute for Cell Biology, Histology and Embryology, Medical University of Graz, Austria*

<sup>17</sup>*Teratology Information Service (TIS), Netherlands Pharmacovigilance Centre Lareb, the Netherlands*

<sup>18</sup>*Division of Mental Health, Norwegian Institute of Public Health, Oslo, Norway*

**Corresponding author:**

1  
2  
3 Angela Lupattelli, MScPharm,  
4 Department of Pharmacy, School of Pharmacy, University of Oslo,  
5 PO Box 1068 Blindern, 0316 Oslo, Norway  
6  
7  
8 e-mail: angela.lupattelli@farmasi.uio.no; phone: +47 41343628 ; fax: +4722854402  
9

10  
11 **Key words:** pregnancy; drug utilization, maternal health; health behaviour; public  
12 health  
13

14  
15  
16 **Word count** (excluding title page, abstract, references, figures and tables): 3637  
17  
18  
19  
20  
21  
22  
23  
24  
25  
26  
27  
28  
29  
30  
31  
32  
33  
34  
35  
36  
37  
38  
39  
40  
41  
42  
43  
44  
45  
46  
47  
48  
49  
50  
51  
52  
53  
54  
55  
56  
57  
58  
59  
60



**ABSTRACT**

**Objectives:** Inter-country comparability between studies on medication use in pregnancy is difficult due to dissimilarities in study design and methodology. This study aimed to examine patterns and factors associated with medications use in pregnancy from a multinational perspective, with emphasis on type of medication utilized and indication for use.

**Design:** Cross-sectional, [webinternet](#)-based study performed within the period from 1-Oct-2011 to 29-Feb-2012. Uniform collection of drug utilization data was performed via an anonymous online questionnaire.

**Setting:** Multinational study in Europe (Western, Northern, and Eastern), North and South America, and Australia.

**Participants:** Pregnant women and new mothers with children less than one year of age.

**Primary and secondary outcome measures:** Prevalence [of](#) and factors associated with medication use for acute/short-term illnesses, chronic/long-term disorders and over-the-counter (OTC) medication use.

**Results:** The study population included 9,459 women whereof 81.2% reported use of at least one medication (prescribed or OTC) during pregnancy. Overall, OTC medication use occurred in 66.9% of the pregnancies, whereas 68.4% and 17.0% of women reported use of at least one medication for treatment of acute/short-term illnesses and chronic/long-term disorders, respectively. The extent of self-reported

1  
2  
3 medicated illnesses and types of medication used by indication varied across regions,  
4  
5 especially in relation to urinary tract infections, depression or OTC nasal sprays.  
6

7 Women with higher age or lower educational level, housewives, or women with an  
8  
9 unplanned pregnancy were those most often reporting use of medication for  
10  
11 chronic/long-term disorders. Immigrant women in Western (aOR: 0.55, 95% CI: 0.34-  
12  
13 0.87) and Northern Europe (aOR: 0.50, 95% CI: 0.31-0.83) were less likely to report  
14  
15 use of medication for chronic/long-term disorders during pregnancy than non-  
16  
17 immigrants.  
18  
19

## 20 21 22 **Conclusions:**

23  
24 In this study, the majority of women in Europe, North America, South America and  
25  
26 Australia used at least one medication during pregnancy. There was a substantial  
27  
28 inter-region variability in the types of medication used.  
29  
30  
31  
32  
33  
34  
35  
36  
37  
38  
39  
40  
41  
42  
43  
44  
45  
46  
47  
48  
49  
50  
51  
52  
53  
54  
55  
56  
57  
58  
59  
60

## ARTICLE SUMMARY

### Strengths and limitations of this study

- Uniform data collection of drug utilization data across all participating countries allows for inter-country comparability of the prevalence of medication use during pregnancy, up to now impeded by differences in study design and methodology.
- The study adds a multinational perspective on OTC medication use during pregnancy to the limited number of studies quantifying the extent of self-medication during pregnancy.
- Lack of validity of the self-reported diagnoses is a limitation since all disorders and related medication use were self-reported by the study participants.
- A ~~an~~ internet web-based survey as a study method impedes calculation of a conventional response rate and may cause selection bias of the target population.

**FUNDING STATEMENT**

This work was supported by the Norwegian Research Council grant number 216771/F11 and by the Foundation for Promotion of Norwegian Pharmacies and the Norwegian Pharmaceutical Society.

**COMPETING INTERESTS:** None declared

For peer review only

## INTRODUCTION

Ethical reasons preclude inclusion of pregnant women in the vast majority of pre-marketing clinical trials.[1] As a consequence, most medications are placed onto the market without a directly established safety profile in human pregnancy.[2] So far, few medications have been shown to be major teratogens, yet the risk of minor teratogenicity or of more subtle effects on fetal development still have to be determined for most of them.[3] Despite this, medication use during pregnancy is common. Mitchell et al. found that use of medications, either prescribed or purchased over-the-counter (OTC), occurred in 88.8% of all pregnancies in the USA.[4] In Europe, prevalence estimates of prescribed medication use vary considerably across countries, ranging from 26% in Serbia to 93% in France.[5-10] Such inter-country variability could, at least in part, be caused by differences in study design, methodology and exposure ascertainment across studies.[11] Uniform collection of drug utilization data during pregnancy between countries may overcome such drawbacks, allowing for inter-country comparability of prevalence estimates and shedding light on differences in prenatal care in the various countries.

Prior studies have addressed research priorities in this area such as presenting results on an individual drug level according to the indication of use, quantifying the extent of OTC and prescribed medication use during pregnancy, and taking into account inter-country comparability.[4] Only a few studies have individually examined maternal factors associated with specific types of medication use during pregnancy.[11-14]

1  
2  
3 The objectives of the current study were to examine patterns of medication use in  
4 pregnancy from a multinational perspective, with special emphasis on type of  
5 medication utilized, including OTC medications, and self-reported indications for use,  
6 and to identify maternal background factors potentially associated with medication  
7 use for acute/short-term illnesses, medication use for chronic/long-term disorders and  
8 OTC medication use during pregnancy.  
9  
10  
11  
12  
13  
14  
15

## 16 17 **METHODS**

### 18 19 **Study design and data collection**

20  
21  
22 This is a multinational, cross-sectional, ~~internet~~web-based study. Pregnant women at  
23 any gestational week and mothers with children less than one year of age were  
24 eligible to participate. Member countries of the European Network of Teratology  
25 Information Services (ENTIS), The Organization of Teratology Information  
26 Specialists (OTIS) in North America, MotherSafe in Australia and European  
27 institutions conducting public health research were invited to take part in the project.  
28 Of these, 18 countries participated (Australia, Austria, Canada, Croatia, Finland,  
29 France, Iceland, Italy, Netherlands, Norway, Poland, Russia, Serbia, Slovenia,  
30 Sweden, Switzerland, United Kingdom and USA). Data originating from some South  
31 and Central American countries were also collected through OTIS. Because of the  
32 low number of participants on the individual country level, the region of Central  
33 America was excluded and countries in South America were aggregated into one  
34 region. Data selection to achieve the final study sample was performed as depicted in  
35 Figure 1. Participants were categorized according to the reported country of residency  
36 and grouped into six regions: Western Europe, Northern Europe, Eastern Europe,  
37 North America, South America and Australia.  
38  
39  
40  
41  
42  
43  
44  
45  
46  
47  
48  
49  
50  
51  
52  
53  
54  
55  
56  
57  
58  
59  
60

1  
2  
3 Data were collected through an anonymous on-line questionnaire administered by  
4  
5 Quest Back (<http://www.questback.com>) and accessible for a period of two months in  
6  
7 each participating country within the period 1-Oct-2011 to 29-Feb-2012. The  
8  
9 questionnaire was open to the public via utilization of banners (invitations to  
10  
11 participate in the study) on national websites and/or social networks commonly  
12  
13 visited and consulted by pregnant women and/or new mothers. The complete  
14  
15 questionnaire is presented in Appendix 1. Detailed information about recruitment  
16  
17 tools utilized and internet penetration rates is summarized in Appendix 2.  
18  
19

20  
21  
22 The questionnaire was first developed in Norwegian and English and then translated  
23  
24 into the other relevant languages. A pilot study was carried out in September 2011  
25  
26 (n=47) and elicited no major change to the questionnaire. Collected data were  
27  
28 scrutinized for the presence of potential duplicates (based on reported country of  
29  
30 residency, socio-demographic characteristics, date and exact time of questionnaire  
31  
32 completion) but none were identified.  
33  
34

### 35 36 **Exposure variables**

37  
38 Maternal socio-demographics (i.e. region of residency, age, educational level, mother  
39  
40 tongue, working status at time of conception, previous children, marital status and  
41  
42 unplanned pregnancy) and life-style characteristics (i.e. smoking status before and  
43  
44 during pregnancy and alcohol consumption after awareness of pregnancy) constituted  
45  
46 the exposure variables. To assess external validity, we compared socio-demographic  
47  
48 and life-style characteristics of our study population on an individual country level  
49  
50 with those of the general birthing population in the same country. Reports of National  
51  
52 Statistics Bureaus or previous national studies were utilized for this purpose. The ratio  
53  
54  
55  
56  
57  
58  
59  
60

1  
2  
3 between the number of respondents and the estimated number of live births in the 2-  
4  
5 months period was also examined for each country (Appendix 3).  
6  
7

### 8 **Outcome variables**

9  
10 Use of any medication, medication for acute/short-term illnesses, medication for  
11  
12 chronic/long-term disorders and OTC medication use during pregnancy constituted  
13  
14 the outcome variables. Participants were first confronted with a list of the most  
15  
16 common acute/short-term illnesses (i.e. nausea, heartburn, constipation, common cold,  
17  
18 urinary tract infections (UTIs), other infections, pain in the neck/back/pelvic girdle,  
19  
20 headache, sleeping problems) and the most prevalent chronic/long-term disorders (i.e.  
21  
22 asthma, allergy, hypothyroidism, rheumatic disorders, diabetes, epilepsy, depression,  
23  
24 anxiety, cardiovascular disease, other disorders) and asked whether they suffered/had  
25  
26 suffered from these conditions during pregnancy. In case of an affirmative response,  
27  
28 women were questioned about medication use for each individual indication as a free-  
29  
30 text entry. Use of OTC medications was also recorded. Recall was aided with a list of  
31  
32 five OTC medication categories: painkillers, nasal spray/drops, antinauseants,  
33  
34 antacids and laxatives, along with examples of brand name products of relevance in  
35  
36 each country. It was optional to report timing of exposure for each of the medication  
37  
38 use questions (the alternatives were gestational weeks 0-12 (1<sup>st</sup> trimester), 13-24 (2<sup>nd</sup>  
39  
40 trimester) and 25-delivery (3<sup>rd</sup> trimester)).  
41  
42  
43  
44  
45  
46

47 We defined a medicine as a single product containing one or more active ingredients.

48 We initially identified the main active ingredient(s) and formulation of the reported  
49  
50 medicinal products either in the relevant national medicines database or in the  
51  
52 “Martindale” textbook.[15] All recorded medications were coded into the  
53  
54 corresponding Anatomical Therapeutic Chemical (ATC) codes at the ATC 5<sup>th</sup> level  
55  
56  
57  
58



1  
2  
3 (i.e. the substance level) whenever possible, otherwise into the 2<sup>nd</sup>- 4<sup>th</sup> levels as  
4  
5 appropriate, in accordance with the World Health Organization ATC index.[16] The  
6  
7 OTC status of medications was crosschecked with the prescription policies within  
8  
9 each country. Whenever a prescription medication was reported under the OTC  
10  
11 question, this record was omitted from the analysis of OTC use but counted in the  
12  
13 estimation of total medication use (including prescription and OTC). Iron, mineral  
14  
15 supplements, vitamins, herbal remedies and any type of alternative medicine were  
16  
17 recorded separately and excluded from the estimation of medication use.  
18  
19

20  
21  
22 The required sample size calculation for the outcome variables on region and  
23  
24 individual country levels are outlined in Appendix 4. The expected prevalence  
25  
26 estimates were set according to results of previous studies.[5-10,17,18]  
27  
28

### 29 30 **Ethics**

31  
32 All participants gave informed consent by answering “Yes” to the question “Are you  
33  
34 willing to participate in the study?” The study was approved by the Regional Ethics  
35  
36 Committee, Region South-East in Norway. Ethical approval or study notification to  
37  
38 the relevant national Ethics Boards was achieved in specific countries as required by  
39  
40 national legislation. All data were handled and stored anonymously.  
41  
42

### 43 44 **Statistical analysis**

45  
46 Descriptive statistics were utilized as appropriate. Univariate and multivariate logistic  
47  
48 regression analyses were used to examine the association between maternal  
49  
50 characteristic and three categorical outcome measures (Yes/No): Medication use for  
51  
52 acute/short-term illnesses; medication use for chronic/long-term disorders; OTC  
53  
54 medication use. P-values of <0.05 were considered statistically significant. Data are  
55  
56  
57

1  
2  
3 presented as adjusted odds ratios (aOR) with 95% confidence intervals (CI). The  
4  
5 analyzed explanatory variables included all maternal socio-demographics and life-  
6  
7 style characteristics. After fitting the univariate logistic regression model for all  
8  
9 explanatory variables, the multivariate model was built and adjusted for all remaining  
10  
11 covariates. The Hosmer and Lemeshow test was used to assess goodness of fit of the  
12  
13 final multivariate model.[19] Analogue sub-analyses on individual region level were  
14  
15 performed. In these instances, region of residency was not included in the model. All  
16  
17 statistical analyses were performed by using the Statistical Package for the Social  
18  
19 Sciences (SPSS) version 20.0 (IBM® SPSS® Statistics).  
20  
21  
22  
23

## 24 RESULTS

### 25 Population characteristics

26  
27  
28 A total of 9,615 women accessed the on-line questionnaire whereof 98.6% completed  
29  
30 it. The participant flow-chart to achieve final study population (n=9,459) is depicted  
31  
32 in Figure 1. A total of 5,089 women (53.8%) were pregnant at the time of completion  
33  
34 of the questionnaire, whereas 4,370 women (46.2%) had delivered their babies within  
35  
36 the previous year. Of the former group, 1,095 (21.5%), 1,702 (33.4%) and 2,291  
37  
38 (45.0%) women were in the first, second and third trimester of pregnancy,  
39  
40 respectively. Of the latter group, 1,320 (30.2%), 947 (21.7%) and 2,102 (48.1%) had a  
41  
42 baby of age  $\leq 16$  weeks, 17-28 weeks, and  $\geq 29$  weeks, respectively. For two women  
43  
44 the time of gestation/baby's age was unknown. Overall, the birthing population in  
45  
46 each participating country was reflected quite well by the sample with respect to age,  
47  
48 parity and smoking habits (Appendix 3). However, there was a difference in terms of  
49  
50 educational level; on average, the women in the study had higher education than the  
51  
52 general birthing population in each country. In addition, participants in Sweden,  
53  
54  
55  
56  
57  
58  
59  
60

1  
2  
3 Austria, Iceland and Italy were slightly more often primiparous, whereas the  
4  
5 responders in Australia, USA, The Netherlands, Slovenia and Croatia were somewhat  
6  
7 older than the general birthing population.  
8  
9

### 10 **Total medication use**

11  
12 After exclusion of vitamins, mineral supplements and iron, use of at least one  
13  
14 medication either prescribed or OTC at any time during pregnancy was reported by  
15  
16 7,678 out of 9,459 women (81.2%). Figure 2 depicts prevalence estimates of total  
17  
18 medication use during pregnancy by region and country of residence. The extent of  
19  
20 OTC medication use, as well as medication use for acute/short-term illnesses and  
21  
22 chronic/long-term disorders is also outlined. The highest prevalence of total  
23  
24 medication use during pregnancy was observed in The Netherlands (95.1%), Iceland  
25  
26 (93.0%) and Finland (92.3%). The overall prevalence estimates of medication use in  
27  
28 pregnancy according to timing and drug class (ATC level 1 and 2) are presented in  
29  
30 Appendix 5. Medications for the nervous system (ATC class N) were the most  
31  
32 commonly used during pregnancy (57.5%), mostly due to paracetamol  
33  
34 (acetaminophen) and its combinations.  
35  
36  
37  
38  
39

40  
41 A corollary analysis according to pregnancy status showed that pregnant women  
42  
43 reported in a significantly lower degree than new mothers any medication use during  
44  
45 pregnancy (78.8% vs. 84.0%, p-value<0.001), as well as OTC medication use (63.0%  
46  
47 vs. 71.5%, p-value<0.001) and medication use for acute/short-term illnesses (66.2%  
48  
49 vs. 70.9%, p-value<0.001). In contrast, the difference in medication use for  
50  
51 chronic/long-term disorders was not significant (17.4% vs. 16.5%, p-value=0.271).  
52  
53  
54 None of the rates differed significantly when women in the third trimester of  
55  
56 pregnancy were compared to new mothers.  
57  
58  
59  
60

### Medication use according to indication

Headache, heartburn, pain, nausea and UTIs constituted the leading indications for use of medication during pregnancy among the acute/short-term illnesses analyzed. Hypothyroidism, asthma, allergy and depression were the leading indications for chronic/long-term medication use. Observed prevalence rates of these disorders, overall and by region of residency, are presented in Appendices 6 and 7, respectively, along with rates of total and specific medication use. Table 1 outlines prevalence estimates of OTC medication use during pregnancy by region and indication for use. Only the most common medication groups reported are presented. Inter-region variations in rates and types of medication used during pregnancy were observed both for acute/short-term illnesses (e.g. nausea and UTIs), chronic/long-term disorders (e.g. asthma and depression) and OTC medications (e.g. nasal spray).

### Factors associated with medication use

Factors associated with medication use during pregnancy according to type of medication utilized are presented in table 2. Use of chronic/long-term medications during pregnancy was reported in a significant larger extent by women in Northern Europe (aOR: 1.68, 95% CI: 1.46-1.94), North America (aOR: 1.80, 95% CI: 1.42-2.28) and Australia (aOR: 2.76, 95% CI: 2.03-3.76) compared to women in Western Europe. Older women or housewives, those with low education or with an unplanned pregnancy, were the ones most often reporting use of chronic/long-term medication. Sub-analysis on individual region level revealed that women not having the official language of the country of residency as mother tongue were less likely to report chronic/long-term medication use in Western (aOR: 0.55, 95% CI: 0.34-0.87) and Northern Europe (aOR: 0.50, 95% CI: 0.31-0.83), but not in the other regions.

**Table 1:** Use of OTC medication at any time during pregnancy by ATC level, indication for use and region (n=9,459) <sup>\*†</sup>

| OTC medication use, overall and by drug groups           | REGION              |                     |                   |                   |                   |                   | Total               |
|----------------------------------------------------------|---------------------|---------------------|-------------------|-------------------|-------------------|-------------------|---------------------|
|                                                          | Western Europe      | Northern Europe     | Eastern Europe    | North America     | South America     | Australian        |                     |
|                                                          | n=3,201             | n=2,820             | n=2,342           | n=533             | n=346             | n=217             | n=9,459             |
|                                                          | n (%)               | n (%)               | n (%)             | n (%)             | n (%)             | n (%)             | n (%)               |
| <b>OTC painkillers, total</b>                            | <b>1,714 (53.5)</b> | <b>1,773 (62.9)</b> | <b>734 (31.3)</b> | <b>284 (53.3)</b> | <b>127 (36.7)</b> | <b>151 (69.9)</b> | <b>4,783 (50.6)</b> |
| <i>By drug group</i>                                     |                     |                     |                   |                   |                   |                   |                     |
| Paracetamol (incl. combinations) (N02BE)                 | 1,655 (51.7)        | 1,735 (61.5)        | 630 (26.9)        | 263 (49.3)        | 87 (25.1)         | 146 (67.3)        | 4,516 (47.7)        |
| Non-steroidal antiinflammatory drugs (M01A)              | 70 (2.2)            | 182 (6.5)           | 68 (2.9)          | 40 (7.5)          | 59 (17.1)         | 7 (3.2)           | 426 (4.5)           |
| Acetylsalicylic acid (incl. combinations) (N02BA)        | 7 (0.2)             | 11 (0.4)            | 32 (1.4)          | 2 (0.4)           | 2 (0.6)           | 1 (0.5)           | 55 (0.6)            |
| Metamizole (N02BB02)                                     | -                   | 6 (0.2)             | 31 (1.3)          | 1 (0.2)           | 12 (3.5)          | -                 | 50 (0.5)            |
| <b>OTC antacids, total</b>                               | <b>1,011 (31.6)</b> | <b>883 (31.3)</b>   | <b>583 (24.9)</b> | <b>129 (24.2)</b> | <b>48 (13.9)</b>  | <b>76 (35.0)</b>  | <b>2,730 (28.9)</b> |
| <i>By drug group</i>                                     |                     |                     |                   |                   |                   |                   |                     |
| Antacids (aluminium, salts combinations, antiflatulents) | 472 (14.7)          | 550 (19.5)          | 508 (21.7)        | 47 (8.8)          | 36 (10.4)         | 54 (24.9)         | 1,667 (17.6)        |
| Alginic acid complex/sucralfate/bismuth (A02BX)          | 606 (18.9)          | 421 (14.9)          | 87 (3.7)          | 4 (0.8)           | 1 (0.3)           | 17 (7.8)          | 1,136 (12.0)        |
| H <sub>2</sub> receptor antagonists (A02BA)              | 20 (0.6)            | 20 (0.7)            | 16 (0.7)          | 57 (10.1)         | 10 (2.9)          | 17 (7.8)          | 137 (1.4)           |
| Antacids with calcium (A02AC)                            | 23 (0.7)            | 12 (0.4)            | 10 (0.4)          | 69 (12.9)         | 2 (0.6)           | 10 (4.6)          | 126 (1.3)           |
| Proton pump inhibitors (A02BC)                           | 38 (1.2)            | 52 (1.8)            | -                 | 10 (1.9)          | 2 (0.6)           | 5 (0.3)           | 107 (1.1)           |
| <b>OTC nasal sprays/drops, total</b>                     | <b>272 (8.5)</b>    | <b>742 (26.3)</b>   | <b>451 (19.3)</b> | <b>35 (6.6)</b>   | <b>7 (2.0)</b>    | <b>14 (6.5)</b>   | <b>1,521 (16.1)</b> |
| <i>By drug group</i>                                     |                     |                     |                   |                   |                   |                   |                     |
| Sympathomimetic nasal decongestants (R01AA/R01BB)        | 204 (6.4)           | 683 (24.2)          | 365 (15.6)        | 20 (3.8)          | 3 (0.9)           | 4 (1.8)           | 1,279 (13.5)        |
| Nasal corticosteroids (R01AD)                            | 31 (1.0)            | 49 (1.7)            | 12 (0.5)          | 5 (0.9)           | 2 (0.6)           | 10 (4.6)          | 109 (1.2)           |
| Nasal immunostimulants (low dose interferon) (L03A)      | -                   | -                   | 28 (1.2)          | -                 | -                 | -                 | 28 (0.3)            |
| <b>OTC laxatives, total</b>                              | <b>240 (7.5)</b>    | <b>227 (8.0)</b>    | <b>237 (10.1)</b> | <b>50 (9.4)</b>   | <b>8 (2.3)</b>    | <b>19 (8.8)</b>   | <b>781 (8.3)</b>    |
| <i>By drug group</i>                                     |                     |                     |                   |                   |                   |                   |                     |
| Osmotically acting laxatives (A06AD)                     | 159 (5.0)           | 171 (6.1)           | 197 (8.4)         | 2 (0.4)           | 2 (0.6)           | 8 (3.7)           | 539 (5.7)           |
| Contact laxatives (A06AB)                                | 28 (0.9)            | 44 (1.6)            | 18 (0.8)          | 7 (1.3)           | 6 (1.7)           | 2 (0.9)           | 105 (1.1)           |

15

| OTC medication use, overall and by drug groups | REGION              |                     |                     |                   |                   |                   | Total               |
|------------------------------------------------|---------------------|---------------------|---------------------|-------------------|-------------------|-------------------|---------------------|
|                                                | Western Europe      | Northern Europe     | Eastern Europe      | North America     | South America     | Australian        |                     |
|                                                | <b>n=3,201</b>      | <b>n=2,820</b>      | <b>n=2,342</b>      | <b>n=533</b>      | <b>n=346</b>      | <b>n=217</b>      | <b>n=9,459</b>      |
|                                                | <b>n (%)</b>        | <b>n (%)</b>        | <b>n (%)</b>        | <b>n (%)</b>      | <b>n (%)</b>      | <b>n (%)</b>      | <b>n (%)</b>        |
| Enemas (A06AG)                                 | 3 (0.1)             | 25 (0.9)            | 34 (1.5)            | 4 (0.8)           | -                 | 2 (0.9)           | 68 (0.7)            |
| Softeners, emollients (A06AA)                  | 8 (0.2)             | -                   | -                   | 38 (7.1)          | -                 | 6 (2.8)           | 52 (0.5)            |
| <b>OTC antinauseants, total</b>                | <b>263 (8.2)</b>    | <b>273 (9.7)</b>    | <b>41 (1.8)</b>     | <b>60 (11.3)</b>  | <b>28 (8.1)</b>   | <b>40 (18.4)</b>  | <b>705 (7.5)</b>    |
| <i>By drug group</i>                           |                     |                     |                     |                   |                   |                   |                     |
| First generation antihistamines (R06A)         | 141 (4.4)           | 256 (9.1)           | 7 (1.5)             | 55 (10.3)         | 5 (1.4)           | 5 (2.3)           | 469 (5.0)           |
| Metoclopramide/domperidone/bromopride (A03FA)  | 113 (3.5)           | 5 (0.2)             | 18 (0.8)            | 2 (0.4)           | 19 (5.5)          | 27 (12.4)         | 184 (1.9)           |
| <b>Total OTC medication use</b>                | <b>2,163 (67.6)</b> | <b>2,155 (76.4)</b> | <b>1,347 (57.5)</b> | <b>342 (64.2)</b> | <b>156 (45.1)</b> | <b>168 (77.4)</b> | <b>6,331 (66.9)</b> |

Abbreviations: OTC: Over-The-Counter medications.

\*Countries are grouped into regions as shown in Figure 1.

†Sums of percentages do not add up to total medication use as only most common medication groups are presented. Rates do not include mineral supplements, vitamins, iron, and herbal or alternative medicine products.

**Table 2:** Factors associated with medication use in pregnancy (n=9,459)\*

|                             | Medication use                              |                         |                                              |                         |                  |                         |
|-----------------------------|---------------------------------------------|-------------------------|----------------------------------------------|-------------------------|------------------|-------------------------|
|                             | For acute/short-term illnesses<br>(n=6,469) |                         | For chronic/long-term disorders<br>(n=1,604) |                         | OTC<br>(n=6,331) |                         |
|                             | n (%)                                       | aOR (95% CI)            | n (%)                                        | aOR (95% CI)            | n (%)            | aOR (95% CI)            |
| <b>Region of residency†</b> |                                             |                         |                                              |                         |                  |                         |
| Western Europe              | 2,224 (69.5)                                | Reference               | 462 (14.4)                                   | Reference               | 2,163 (67.6)     | Reference               |
| Northern Europe             | 1,954 (69.3)                                | 0.96 (0.86-1.08)        | 593 (21.0)                                   | <b>1.68 (1.46-1.94)</b> | 2,155 (76.4)     | <b>1.54 (1.36-1.74)</b> |
| Eastern Europe              | 1,474 (62.9)                                | <b>0.69 (0.61-0.78)</b> | 322 (13.7)                                   | 1.03 (0.87-1.21)        | 1,347 (57.5)     | <b>0.60 (0.53-0.67)</b> |
| North America               | 403 (75.6)                                  | <b>1.28 (1.03-1.60)</b> | 119 (22.3)                                   | <b>1.80 (1.42-2.28)</b> | 342 (64.2)       | <b>0.81 (0.66-0.99)</b> |
| South America               | 250 (82.3)                                  | 1.03 (0.79-1.34)        | 38 (11.0)                                    | 0.70 (0.48-1.01)        | 156 (45.1)       | <b>0.34 (0.27-0.44)</b> |
| Australia                   | 164 (75.6)                                  | 1.29 (0.93-1.79)        | 70 (32.3)                                    | <b>2.76 (2.03-3.76)</b> | 168 (77.4)       | <b>1.57 (1.12-2.20)</b> |
| <b>Maternal age (years)</b> |                                             |                         |                                              |                         |                  |                         |
| ≤20                         | 232 (70.5)                                  | 1.22 (0.93-1.60)        | 761 (14.7)                                   | <b>0.58 (0.39-0.87)</b> | 205 (62.3)       | 1.05 (0.81-1.36)        |
| 21-30                       | 3,531 (68.2)                                | Reference               | 33 (10.0)                                    | Reference               | 3,461 (66.8)     | Reference               |
| 31-40                       | 2,576 (68.6)                                | 0.90 (0.82-1.00)        | 764 (20.4)                                   | <b>1.44 (1.27-1.63)</b> | 2,531 (67.4)     | <b>0.85 (0.77-0.94)</b> |
| ≥41                         | 130 (66.3)                                  | 0.73 (0.54-1.00)        | 46 (23.5)                                    | <b>1.61 (1.13-2.29)</b> | 134 (68.4)       | 0.86 (0.62-1.19)        |
| <b>Previous children</b>    |                                             |                         |                                              |                         |                  |                         |
| No                          | 3,082 (65.5)                                | Reference               | 735 (15.6)                                   | Reference               | 2,949 (62.6)     | Reference               |
| Yes                         | 3,387 (71.3)                                | <b>1.34 (1.22-1.47)</b> | 869 (18.3)                                   | 1.08 (0.96-1.21)        | 3,382 (71.2)     | <b>1.58 (1.44-1.74)</b> |
| <b>Marital status</b>       |                                             |                         |                                              |                         |                  |                         |
| Married/cohabiting          | 6,066 (68.5)                                | Reference               | 1,503 (17.0)                                 | Reference               | 5,960 (67.3)     | Reference               |
| Single/divorced/others      | 403 (66.3)                                  | 0.91 (0.75-1.10)        | 101 (16.6)                                   | 1.06 (0.83-1.35)        | 371 (61.0)       | 0.91 (0.75-1.10)        |
| <b>Working status</b>       |                                             |                         |                                              |                         |                  |                         |
| Employed, but not as HCP    | 3,737 (66.8)                                | Reference               | 905 (16.2)                                   | Reference               | 3,667 (65.6)     | Reference               |
| HCP                         | 934 (74.4)                                  | <b>1.41 (1.23-1.63)</b> | 240 (19.1)                                   | 1.13 (0.96-1.33)        | 944 (75.2)       | <b>1.42 (1.23-1.64)</b> |
| Student                     | 592 (69.1)                                  | 1.11 (0.94-1.31)        | 128 (14.9)                                   | 1.04 (0.84-1.30)        | 578 (67.4)       | 1.10 (0.93-1.30)        |
| Housewife                   | 608 (72.6)                                  | 1.14 (0.96-1.35)        | 170 (20.3)                                   | <b>1.34 (1.10-1.63)</b> | 577 (68.9)       | 1.05 (0.88-1.24)        |
| Job seeker                  | 281 (66.0)                                  | 0.96 (0.78-1.20)        | 66 (15.5)                                    | 1.03 (0.78-1.36)        | 258 (60.6)       | 0.85 (0.68-1.05)        |
| Other than above            | 311 (65.2)                                  | 0.91 (0.75-1.12)        | 94 (19.7)                                    | <b>1.29 (1.01-1.65)</b> | 302 (63.3)       | 0.91 (0.74-1.12)        |
| <b>Educational level</b>    |                                             |                         |                                              |                         |                  |                         |

|                                                                                             | Medication use                              |                         |                                              |                         |                  |                         |
|---------------------------------------------------------------------------------------------|---------------------------------------------|-------------------------|----------------------------------------------|-------------------------|------------------|-------------------------|
|                                                                                             | For acute/short-term illnesses<br>(n=6,469) |                         | For chronic/long-term disorders<br>(n=1,604) |                         | OTC<br>(n=6,331) |                         |
|                                                                                             | n (%)                                       | aOR (95% CI)            | n (%)                                        | aOR (95% CI)            | n (%)            | aOR (95% CI)            |
| Less than high school                                                                       | 331 (72.7)                                  | 1.17 (0.93-1.49)        | 92 (20.2)                                    | <b>1.51 (1.15-1.97)</b> | 317 (69.7)       | <b>1.32 (1.04-1.67)</b> |
| High school                                                                                 | 1,864 (68.7)                                | Reference               | 428 (15.8)                                   | Reference               | 1,779 (65.6)     | Reference               |
| More than high school                                                                       | 3,574 (68.4)                                | 0.99 (0.89-1.11)        | 916 (17.5)                                   | 1.04 (0.91-1.20)        | 3,489 (66.8)     | 1.07 (0.96-1.19)        |
| Others, unspecified                                                                         | 700 (65.7)                                  | 0.82 (0.70-0.96)        | 168 (15.8)                                   | 0.94 (0.77-1.16)        | 746 (70.0)       | 1.13 (0.97-1.33)        |
| <b>Alcohol use after awareness of pregnancy</b>                                             |                                             |                         |                                              |                         |                  |                         |
| No                                                                                          | 5,270 (67.1)                                | Reference               | 1,322 (16.8)                                 | Reference               | 5,133 (65.3)     | Reference               |
| Yes                                                                                         | 1,144 (75.7)                                | <b>1.59 (1.39-1.81)</b> | 270 (17.9)                                   | 1.11 (0.95-1.29)        | 1,150 (76.1)     | <b>1.95 (1.71-2.23)</b> |
| <b>Smoking during pregnancy</b>                                                             |                                             |                         |                                              |                         |                  |                         |
| No                                                                                          | 5,835 (68.5)                                | Reference               | 1,441 (16.9)                                 | Reference               | 5,716 (67.0)     | Reference               |
| Yes, but less than before pregnancy                                                         | 530 (69.0)                                  | 1.08 (0.91-1.27)        | 130 (16.9)                                   | 1.01 (0.82-1.25)        | 511 (66.5)       | 1.06 (0.90-1.26)        |
| Yes, the same or more than before pregnancy                                                 | 88 (67.7)                                   | 0.95 (0.64-1.40)        | 28 (21.5)                                    | 1.19 (0.74-1.90)        | 89 (68.5)        | 1.21 (0.81-1.82)        |
| <b>Planned pregnancy</b>                                                                    |                                             |                         |                                              |                         |                  |                         |
| Yes                                                                                         | 5,836 (68.4)                                | Reference               | 1,427 (16.7)                                 | Reference               | 5,727 (67.2)     | Reference               |
| No                                                                                          | 616 (68.4)                                  | 0.96 (0.82-1.12)        | 173 (19.2)                                   | <b>1.29 (1.06-1.56)</b> | 587 (65.1)       | 1.00 (0.85-1.17)        |
| <b>First language different from the official main language in the country of residency</b> |                                             |                         |                                              |                         |                  |                         |
| No                                                                                          | 6,089 (68.5)                                | Reference               | 1,530 (17.2)                                 | Reference               | 5,972 (67.1)     | Reference               |
| Yes                                                                                         | 363 (67.2)                                  | 0.93 (0.76-1.12)        | 71 (13.1)                                    | <b>0.66 (0.50-0.86)</b> | 347 (64.3)       | 0.89 (0.74-1.08)        |

Abbreviation: HCP: health care provider.

\*Numbers may not add up due to missing values. Missing values are less than 5% of the total. Mineral supplements, vitamins, iron, herbal or alternative medicine products are not included in the medication use estimates.

†Countries are grouped into regions as shown in Figure 1.



## DISCUSSION

This is the first ~~internet~~web-based study examining patterns and factors associated with medication use during pregnancy on a multinational level. In all regions, approximately eight out of ten women reported use of at least one medication, either prescribed or OTC, during the course of their pregnancy. This finding is in line with previous research conducted in Europe, North America, South America and Australia,[4,20-25] though our estimates were somewhat higher in some of the Eastern European countries, e.g. Serbia, than those observed in a previous study.[5] Different recruitment strategies, i.e. ~~web~~internet-based in our study versus maternity care unit-/community pharmacy-based in the previous study could explain such discrepancy.

Overall, analgesics, antacids, nasal decongestants/antiallergics and systemic antibiotics were the medication groups dominating the drug utilization scenario, as also shown by previous research.[4,20-22] However, our study also provides insights into the proportion of medicated women among those suffering from a specific illness during pregnancy across the six regions. We found that approximately seven out of ten women who reported UTIs were treated with antibiotics during pregnancy. This related to all regions, except Eastern Europe where it was only four out of ten women. Since women may perceive dysuria without ascertainment of bacteriuria in the urine as UTI, an over-reporting of the illness could have occurred. Yet, a sub-optimal treatment of UTIs during pregnancy in Eastern Europe cannot be ruled out. The inter-country variability in the types of antibiotics used for UTIs could simply be explained by differences in prescribing practice,[26] presence of screening for bacteriuria in early pregnancy, or specific antibiotic resistance patterns.

1  
2  
3 Even though nausea was the condition affecting most women in all six regions, the  
4  
5 corresponding proportions of medicated nausea were generally low. This scenario is probably  
6  
7 due to two main factors: a) the predominantly mild character of nausea and the possibility of  
8  
9 non-pharmacological management (e.g. dietary advices); b) the reluctance of general  
10  
11 practitioners to prescribe antinauseants even though safety profile assessments are in  
12  
13 place.[27,28] As also shown in previous studies,[4,29] use of serotonin antagonists in North  
14  
15 America and Australia is increasing also in pregnancy compared to the other regions, eliciting  
16  
17 the need of sound studies assessing the safety profile of this drug group in pregnancy.  
18  
19

20  
21 In most regions, the self-reported prevalence of hypothyroidism was somewhat higher than  
22  
23 the reported hormone substitution rate. Because of its known association with adverse  
24  
25 pregnancy outcomes,[30] the unexpected finding of potential sub-optimal treatment of  
26  
27 hypothyroidism during pregnancy deserves attention. It could probably be due to a lack of  
28  
29 information about hypothyroidism typology and its diagnostic ascertainment in our study.  
30  
31

32  
33 In our study, depression was self-reported and not based on any psychometric assessment,  
34  
35 thus the observed substantial inter-regional variability in the extent of this disorder and related  
36  
37 medication use could have certainly been affected by women's attitudes in reporting. Our  
38  
39 estimate of medication use for depression in Australia was higher than that observed in a  
40  
41 recent study (10.6% versus 2.1%).[31] However, the similarity in self-reported depression  
42  
43 itself (11.5% versus 15.6%) suggests that our population might mostly comprise women who  
44  
45 did not discontinue their pharmacological therapy once they became pregnant. Our estimates  
46  
47 for North America and Western Europe were in line with recent literature showing an increase  
48  
49 in antidepressant use in pregnancy during the last years.[4,32] Selective serotonin reuptake  
50  
51 inhibitors (SSRIs) were the most widely used antidepressant class. Recent meta-analyses have  
52  
53 shown that antidepressants, including SSRIs, do increase the risk of poor neonatal adaptation  
54  
55  
56  
57  
58  
59  
60

syndrome, specific cardiovascular malformations and persistent pulmonary hypertension of the newborn.[33-35] However, the clinical impact of the latter two outcomes, in absolute terms, is small and the risk of pharmacotherapy should always be weighted versus the risk of undertreated depression in pregnancy.

In most regions approximately 60-70% of women reported use of at least one OTC medication during the course of their pregnancies, mostly for pain conditions, heartburn and upper airways disorders, indicating a substantially high rate of self-medication during pregnancy. This estimate aligns with previous research carried out in North America.[17] Of note, self-medication with OTC sympathomimetic nasal decongestants was more extensive in Northern and Eastern Europe than in the remaining regions; this could be explained by the time of the year when the data collection was performed.

Region of residency was an important factor associated with medication use during pregnancy. As also shown by Cleary et al.,[36] we found that rates of medication use among women originally from Eastern Europe and South America were significantly lower than those observed in Western Europe, North America and Australia. Such geographical differences could be due to culture, variations in prenatal care assistance or access to medications in the various regions and the related costs.

Women working as health care providers, consuming alcohol during pregnancy, or with previous children were those more likely to use short-term and OTC medications, possibly reflecting higher confidence in self-treatment and use of medications in general in the former instance, and less anxiety for the pregnancy outcome in the latter two instances.

Contrary to previous studies indicating an association between higher maternal education and more prevalent use of medication during pregnancy,[14,17,23] we found that lower education

1  
2  
3 was associated with a higher use of OTC medications as well as medication for chronic/long-  
4  
5 term disorders (30-50% increased risk). Results of similar magnitude (30% increased risk)  
6  
7 were also observed by Olesen et al.[37], whereas Stockholm et al. [38] identified a stronger  
8  
9 association (2.3-fold increased risk) between low maternal education and use of antibiotic for  
10  
11 respiratory tract infections during pregnancy. One factor negatively associated with  
12  
13 chronic/long-term medication use was not having the official language of the country of  
14  
15 residency as mother tongue. This tendency was detected in Western and Northern Europe,  
16  
17 rising concerns about the potential health risks for immigrant women in these two regions. As  
18  
19 shown by Hämeen-Anttila et al., 57% of pregnant women have perceived information needs  
20  
21 about medications during pregnancy.[39] Thus, identification of potential users or non-users  
22  
23 of medication during pregnancy might be of clinical relevance. Indeed, this may allow  
24  
25 tailored evidence-based information about medication safety or outcome of sub-optimal  
26  
27 medication of severe medical conditions in pregnancy.  
28  
29  
30  
31

### 32 **Strengths and limitations**

34  
35 The main strength is that data collection was performed uniformly across all participating  
36  
37 countries, allowing for inter-country comparison of the prevalence of medication use during  
38  
39 pregnancy. By quantifying the extent of self-medication with OTC drugs and medication use  
40  
41 according to self-reported indication, it was possible to determine the leading causes for  
42  
43 medication use among pregnant women. Categorization of maternal characteristics positively  
44  
45 associated with the various types of medications used during pregnancy enabled us to identify  
46  
47 which groups of women are more likely to need information about medication use during  
48  
49 pregnancy. The utilization of an anonymous web-based questionnaire enabled us to reach a  
50  
51 large proportion of the birthing population in several countries worldwide. However, we  
52  
53 cannot exclude the possibility that the women who decided to participate in the study differed  
54  
55  
56  
57  
58  
59  
60

1  
2  
3 from the general birthing population in other ways that our analysis could not control for. In  
4  
5 most participating countries the study sample was large enough to warrant calculation of  
6  
7 prevalence estimates with a precision of 5%. However, less precise estimates were permitted  
8  
9 by the study sample in Austria, Iceland and The Netherlands (precision of 9-11%), as well as  
10  
11 in Australia, Canada, Croatia, Serbia, Slovenia, and USA (precision of 6-7%).  
12  
13

14  
15 One main limitation of the study is the lack of validity of the self-reported diagnoses. All  
16  
17 disorders were self-reported by the participants and hence dependent on the women's  
18  
19 perception of the medical condition. Similarly, information about medication use during  
20  
21 pregnancy was dependent on the accuracy of the women's reporting and recall. For new  
22  
23 mothers, data were registered retrospectively; hence a risk of recall bias cannot be ruled out.  
24  
25 In specific countries (Australia, Canada, France, Russia, The Netherlands, and USA) the study  
26  
27 sample was a small proportion of the general birthing population; hence the generalizability of  
28  
29 our findings for these specific countries should be interpreted with caution.  
30  
31  
32

33  
34 The questionnaire was only available through internet websites; by using this kind of  
35  
36 approach a conventional response rate cannot be calculated and a selection bias of the target  
37  
38 population cannot be ruled out. However, recent epidemiological studies indicate reasonable  
39  
40 validity of web-based recruitment methods.[40,41] Also, the penetration rate of the internet  
41  
42 either in households or at work is relatively high among women in childbearing age.[42-46]  
43  
44 Hence, the degree to which our findings can be extrapolated to the target population is based  
45  
46 on the representativeness of the respondents to the general birthing populations in each  
47  
48 country. The sample in each country had a somewhat higher educational level than the general  
49  
50 birthing populations. Such a limitation might have led to ~~biased estimates of the association~~  
51  
52 ~~between maternal education and medication use during pregnancy~~ an underestimation of the  
53  
54 prevalence of medication during pregnancy. Since many ailments requiring pharmacotherapy  
55  
56  
57  
58  
59  
60

1  
2  
3 occur in mid or late pregnancy, inclusion of pregnant women at early gestation in the total  
4  
5 material has somewhat inflated the prevalence of non-users of medications during pregnancy.  
6  
7 Also, women with specific disorders or in need of information about medication use during  
8  
9 pregnancy might have been more likely to consult internet websites and therefore participate  
10  
11 in this study.  
12

## 13 14 15 **CONCLUSIONS**

16  
17 Use of medications for acute/short-term illnesses and chronic/long-term disorders as well as  
18  
19 use of OTC medications, were common during pregnancy. The extent of medicated illnesses  
20  
21 and types of medications used for the different indications varied across the six regions. This  
22  
23 was especially relevant for acute/short-term illnesses such as nausea and UTIs, but also for  
24  
25 chronic/long-term disorders such as hypothyroidism or depression. Women with higher age or  
26  
27 lower educational level, housewives, or women with an unplanned pregnancy were those  
28  
29 most often reporting chronic/long-term medication use, as opposed to immigrants residing in  
30  
31 Western and Northern Europe who reported the least use of this medication category. Future  
32  
33 research should definitely focus on this specific group of women, but also address more  
34  
35 insights into the outcome of sub-optimal medication of severe conditions in pregnancy.  
36  
37  
38  
39  
40  
41  
42  
43  
44  
45  
46  
47  
48  
49  
50  
51  
52  
53  
54  
55  
56  
57  
58  
59  
60

## ACKNOWLEDGMENTS

We thank OTIS, ENTIS Scientific Board who reviewed the study protocol and all website providers who contributed to the recruitment phase. We are grateful to all the participating women who took part in this study.

**AUTHOR'S CONTRIBUTION:** AL, OS and HN conceived the idea for the study and participated in its design and coordination. AL drafted the manuscript and analyzed the data. MJT, KZ, ACM, MEM, MD, AP, KHA, AR, RGJ, MO, DK, GR, HJ, AP and IB contributed to the data collection. All authors contributed to the interpretation of the results and revised the manuscript critically for important intellectual content. All the authors read and approved the final manuscript.

**DATA SHARING STATEMENT:** No additional data are available. Researchers can apply for data access for subprojects within the overall aims of the main study 'The Multinational Medication Use in Pregnancy Study'.

**REFERENCES**

1. ACOG Committee Opinion No. 377: Research involving women. *Obstet Gynecol* 2007;**110**(3):731-6.
2. Adam MP, Polifka JE, Friedman JM. Evolving knowledge of the teratogenicity of medications in human pregnancy. *Am J Med Genet C Semin Med Genet* 2011;**157**(3):175-82.
3. Briggs GG, Freeman RK, Yaffe SJ. *Drugs in pregnancy and lactation*. [S.l.]: Lippincott Williams & Wilkins 2011.
4. Mitchell AA, Gilboa SM, Werler MM, et al. Medication use during pregnancy, with particular focus on prescription drugs: 1976-2008. *Am J Obstet Gynecol* 2011;**205**(1):51 e1-8.
5. Odalovic M, Vezmar Kovacevic S, Ilic K, et al. Drug use before and during pregnancy in Serbia. *Int J Clin Pharm* 2012;**34**(5):719-27.
6. Gagne JJ, Maio V, Berghella V, et al. Prescription drug use during pregnancy: a population-based study in Regione Emilia-Romagna, Italy. *Eur J Clin Pharmacol* 2008;**64**(11):1125-32.
7. Engeland A, Bramness JG, Daltveit AK, et al. Prescription drug use among fathers and mothers before and during pregnancy. A population-based cohort study of 106,000 pregnancies in Norway 2004-2006. *Br J Clin Pharmacol* 2008;**65**(5):653-60.
8. Bakker MK, Jentink J, Vroom F, et al. Drug prescription patterns before, during and after pregnancy for chronic, occasional and pregnancy-related drugs in the Netherlands. *BJOG* 2006;**113**(5):559-68.
9. Lacroix I, Hurault C, Sarramon MF, et al. Prescription of drugs during pregnancy: a study using EFEMERIS, the new French database. *Eur J Clin Pharmacol* 2009;**65**(8):839-46.
10. Malm H, Martikainen J, Klaukka T, et al. Prescription drugs during pregnancy and lactation--a Finnish register-based study. *Eur J Clin Pharmacol* 2003;**59**(2):127-33.



- 1  
2  
3 11. Daw JR, Hanley GE, Greyson DL, et al. Prescription drug use during pregnancy in  
4 developed countries: a systematic review. *Pharmacoepidemiol Drug Saf* 2011;**20**(9):895-902.
- 5  
6  
7 12. Rubin JD, Ferencz C, Loffredo C. Use of prescription and non-prescription drugs in  
8 pregnancy. *J Clin Epidemiol* 1993;**46**(6):581-89.
- 9  
10  
11 13. McKenna L, McIntyre M. What over-the-counter preparations are pregnant women taking?  
12 A literature review. *J Adv Nurs* 2006;**56**(6):636-45.
- 13  
14  
15 14. Odalovic M, Vezmar Kovacevic S, Nordeng H, et al. Predictors of the use of medications  
16 before and during pregnancy. *Int J Clin Pharm* 2013;**35**(3):408-16.
- 17  
18  
19 15. Martindale W, Sweetman SC. *Martindale : the complete drug reference*. London:  
20 Pharmaceutical Press, 2011.
- 21  
22  
23 16. WHO Collaborating Centre for Drugs Statistics Methodology. Guidelines for ATC  
24 classification and DDD assignment 2013. Oslo, 2012. Available at:  
25 [http://www.whocc.no/atc\\_ddd\\_index/](http://www.whocc.no/atc_ddd_index/). Accessed 17 March, 2012.
- 26  
27  
28 17. Refuerzo JS, Blackwell SC, Sokol RJ, et al. Use of Over-the-Counter Medications and  
29 Herbal Remedies in Pregnancy. *Amer J Perinatol* 2005;**22**(EFirst):321,24.
- 30  
31  
32 18. Sawicki E, Stewart K, Wong S, et al. Medication use for chronic health conditions by  
33 pregnant women attending an Australian maternity hospital. *Aust N Z J Obstet Gynaecol*  
34 2011;**51**(4):333-38.
- 35  
36  
37 19. Hosmer DW, Lemeshow S. *Applied logistic regression*. New York: Wiley-Interscience  
38 2000.
- 39  
40  
41 20. Nordeng H, Ystrøm E, Einarson A. Perception of risk regarding the use of medications  
42 and other exposures during pregnancy. *Eur J Clin Pharmacol* 2010;**66**(2):207-14.
- 43  
44  
45 21. Headley J, Northstone K, Simmons H, et al. Medication use during pregnancy: data from  
46 the Avon Longitudinal Study of Parents and Children. *Eur J Clin Pharmacol* 2004;**60**(5):355-  
47  
48  
49  
50  
51  
52  
53  
54  
55  
56  
57  
58  
59  
60 61.

- 1  
2  
3 22. Medication during pregnancy: an intercontinental cooperative study. Collaborative Group  
4 on Drug Use in Pregnancy (C.G.D.U.P.). *Int J Gynaecol Obstet* 1992;**39**(3):185-96.  
5  
6  
7 23. Donati S, Baglio G, Spinelli A, et al. Drug use in pregnancy among Italian women. *Eur J*  
8  
9 *Clin Pharmacol* 2000;**56**(4):323-8.  
10  
11 24. Henry A, Crowther C. Patterns of medication use during and prior to pregnancy: the MAP  
12 study. *Aust N Z J Obstet Gynaecol* 2000;**40**(2):165-72.  
13  
14 25. Marín G, Cañas M, Homar C, et al. Uso de fármacos durante el período de gestación en  
15 embarazadas de Buenos Aires, Argentina. *Rev salud pública* 2010;**12**(5):722-31.  
16  
17 26. European Centre for Disease Prevention and Control. Surveillance of antimicrobial  
18 consumption in Europe, 2010. Stockholm: ECDC, 2013.  
19  
20 27. Smith J, Refuerzo J, Ramin S. Treatment and outcome of nausea and vomiting of  
21 pregnancy. In: Basow D, ed. UpToDate. Waltham, MA: UpToDate, 2013.  
22  
23 28. Gadsby R, Barnie-Adshead T, Sykes C. Why won't doctors prescribe antiemetics in  
24 pregnancy? *BMJ* 2011;**343**:d4387.  
25  
26 29. Raymond SH. A survey of prescribing for the management of nausea and vomiting in  
27 pregnancy in Australasia. *Aust N Z J Obstet Gynaecol* 2013;**53**(4):358-62.  
28  
29 30. Ross DS. Hypothyroidism during pregnancy: Clinical manifestations, diagnosis, and  
30 treatment. In: Basow DS, ed. UpToDate. Waltham, MA: UpToDate, 2013.  
31  
32 31. Lewis AJ, Bailey C, Galbally M. Anti-depressant use during pregnancy in Australia:  
33 findings from the Longitudinal Study of Australian Children. *Aust N Z J Public Health*  
34 2012;**36**(5):487-8.  
35  
36 32. Petersen I, Gilbert RE, Evans SJ, et al. Pregnancy as a major determinant for  
37 discontinuation of antidepressants: an analysis of data from The Health Improvement  
38 Network. *J Clin Psychiatry* 2011;**72**(7):979-85.  
39  
40  
41  
42  
43  
44  
45  
46  
47  
48  
49  
50  
51  
52  
53  
54  
55  
56  
57  
58  
59  
60

- 1  
2  
3 33. Grigoriadis S, VonderPorten EH, Mamisashvili L, et al. Antidepressant exposure during  
4 pregnancy and congenital malformations: Is there an association? A systematic review and  
5 meta-analysis of the best evidence. *J Clin Psychiatry* 2013;**74**(4):e293-e308.  
6  
7  
8  
9  
10 34. Grigoriadis S, Vonderporten EH, Mamisashvili L, et al. Prenatal exposure to  
11 antidepressants and persistent pulmonary hypertension of the newborn: systematic review and  
12 meta-analysis. *BMJ* 2014;**348**:f6932.  
13  
14  
15  
16 35. Grigoriadis S, VonderPorten EH, Mamisashvili L, et al. The effect of prenatal  
17 antidepressant exposure on neonatal adaptation: A systematic review and meta-analysis. *J*  
18 *Clin Psychiatry* 2013;**74**(4):e309-e20.  
19  
20  
21  
22 36. Cleary BJ, Butt H, Strawbridge JD, et al. Medication use in early pregnancy-prevalence  
23 and determinants of use in a prospective cohort of women. *Pharmacoepidemiol Drug Saf*  
24 *2010*;**19**(4):408-17.  
25  
26  
27  
28  
29 37. Olesen C, Thrane N, Henriksen TB, et al. Associations between socio-economic factors  
30 and the use of prescription medication during pregnancy: a population-based study among  
31 19,874 Danish women. *Eur J Clin Pharmacol* 2006;**62**(7):547-53.  
32  
33  
34  
35 38. Stokholm J, Schjorring S, Pedersen L, et al. Prevalence and Predictors of Antibiotic  
36 Administration during Pregnancy and Birth. *PLoS One* 2013;**8**(12):e82932.  
37  
38  
39 39. Hämeen-Anttila K, Jyrkkä J, Enlund H, et al. Medicines information needs during  
40 pregnancy: a multinational comparison. *BMJ Open* 2013;**3**(4).  
41  
42  
43  
44 40. Ekman A, Dickman P, Klint Å, et al. Feasibility of Using Web-based Questionnaires in  
45 Large Population-based Epidemiological Studies. *Eur J Epidemiol* 2006;**21**(2):103-11.  
46  
47  
48  
49 41. van Gelder MM, Bretveld RW, Roeleveld N. Web-based questionnaires: the future in  
50 epidemiology? *Am J Epidemiol* 2010;**172**(11):1292-8.  
51  
52  
53  
54  
55  
56  
57  
58  
59  
60

- 1  
2  
3 42. Seybert H. Internet use in households and by individuals in 2011. Eurostat Statistics in  
4 focus. 2011; Available at: [http://epp.eurostat.ec.europa.eu/cache/ITY\\_OFFPUB/KS-SF-11-066/EN/KS-SF-11-066-EN.PDF](http://epp.eurostat.ec.europa.eu/cache/ITY_OFFPUB/KS-SF-11-066/EN/KS-SF-11-066-EN.PDF). Accessed 13 November, 2012.
- 7  
8  
9 43. Internet World Stats. Usage and population statistics. 2012; Available at:  
10 <http://www.internetworldstats.com/>. Accessed 13 November, 2012.
- 11  
12  
13 44. Australian Bureau of Statistics. Household Use of Information Technology, Australia,  
14 2010-11. Available at: <http://www.abs.gov.au/ausstats/abs@.nsf/Latestproducts/8146.0MainFeatures12010-11?opendocument&tabname=Summary&prodno=8146.0&issue=2010-11&num=&view=>. Accessed 13 November, 2012.
- 20  
21  
22 45. Statistics Canada. Individual Internet use and E-commerce (2010). 2011; Available at:  
23 <http://www.statcan.gc.ca/daily-quotidien/111012/dq111012a-eng.htm>. Accessed 13  
24 November, 2012.
- 25  
26  
27 46. United States Census Bureau. The 2012 Statistical Abstract. Information &  
28 Communications: Internet Publishing and Broadcasting and Internet Usage. 2010; Available  
29 at:  
30 [http://www.census.gov/compendia/statab/cats/information\\_communications/internet\\_publishing\\_and\\_broadcasting\\_and\\_internet\\_usage.html](http://www.census.gov/compendia/statab/cats/information_communications/internet_publishing_and_broadcasting_and_internet_usage.html). Accessed 13 November, 2012.
- 31  
32  
33  
34  
35  
36  
37  
38  
39  
40  
41  
42  
43  
44  
45  
46  
47  
48  
49  
50  
51  
52  
53  
54  
55  
56  
57  
58  
59  
60

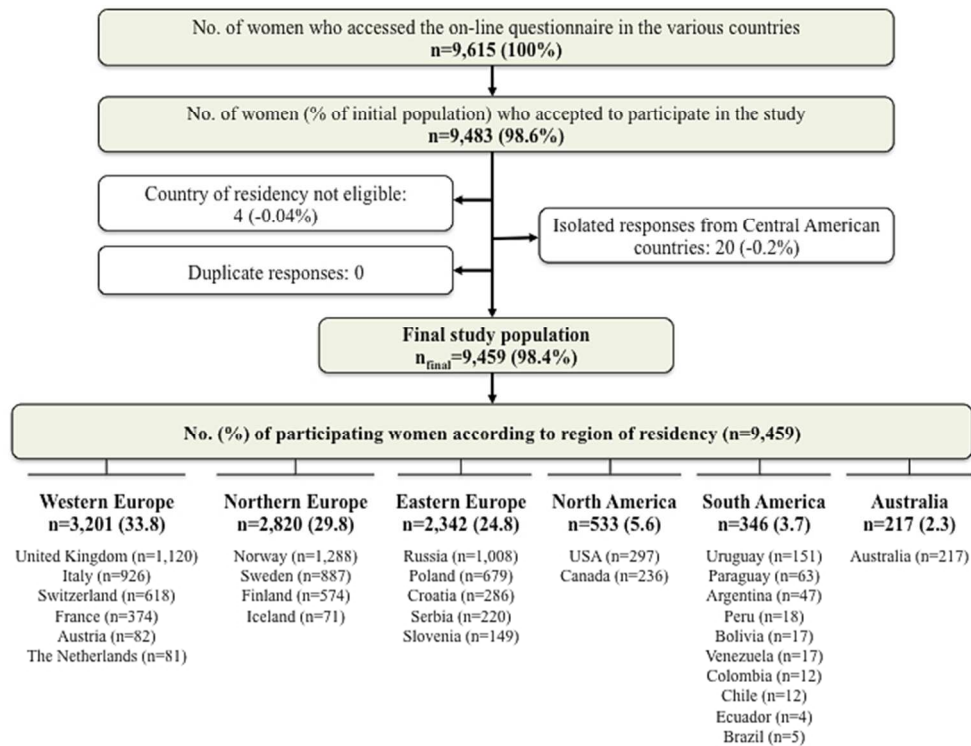

Figure 1 shows the participant flow-chart to achieve the final sample analyzed  
60x45mm (300 x 300 DPI)

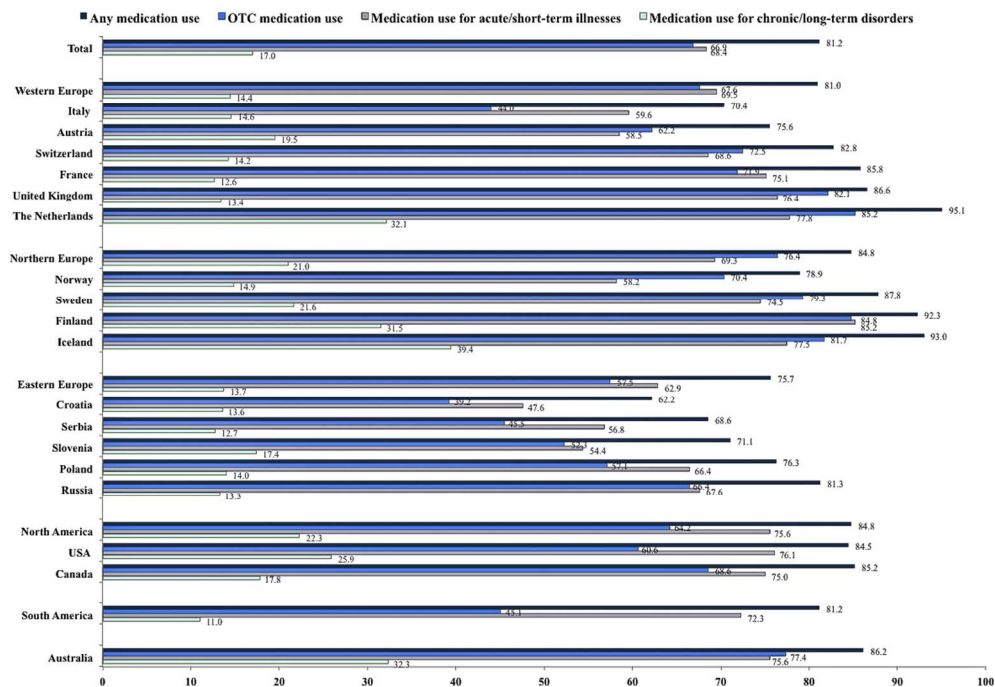

Figure 2 shows the proportion of respondents (%) reporting use of any medication, over-the-counter (OTC) medication, medication for acute/short-term illnesses and medication for chronic/long-term disorders during pregnancy according to region and country of residency. The observed estimates do not include vitamins, mineral supplements, iron, and herbal or alternative medicine products.  
100x69mm (300 x 300 DPI)

Appendix 1: Survey questionnaire

1  
2  
3  
4  
5  
6  
7  
8  
9  
10  
11  
12  
13  
14  
15  
16  
17  
18  
19  
20  
21  
22  
23  
24  
25  
26  
27  
28  
29  
30  
31  
32  
33  
34  
35  
36  
37  
38  
39  
40  
41  
42  
43  
44  
45  
46  
47  
48  
49  
50  
51  
52  
53  
54  
55  
56  
57  
58  
59  
60

***Internet questionnaire***

***Medication use in pregnancy with focus on attitudes,  
perception of risk and mental health***

***The Multinational Medication Use in Pregnancy Study***

---

## INFORMATION ABOUT YOURSELF

|                                                                                                                                                                                                                                                                                                                                                                                 |                                                                                                                                     |
|---------------------------------------------------------------------------------------------------------------------------------------------------------------------------------------------------------------------------------------------------------------------------------------------------------------------------------------------------------------------------------|-------------------------------------------------------------------------------------------------------------------------------------|
| <b>1. In which country do you live?</b><br><b>Country:</b> _____                                                                                                                                                                                                                                                                                                                | <b>In which region/province do you live?</b><br><b>Region:</b> _____                                                                |
| <b>2. Are you pregnant right now?</b><br><input type="checkbox"/> Yes                                                                                                                                                                                                                                                                                                           |                                                                                                                                     |
| <input type="checkbox"/> No                                                                                                                                                                                                                                                                                                                                                     |                                                                                                                                     |
| <b>(If yes in Q2) In which pregnancy week are you?</b><br><b>From 1 to 44</b>                                                                                                                                                                                                                                                                                                   | <b>(If No in Q2) How old is your newborn child (in weeks)?</b><br><b>0-4 / 5-8 / 9-12 / 13-16 / 17-20 / 21-24 / 25-28 / &gt; 29</b> |
| <b>(If yes in Q2) Is it a multiple pregnancy?</b><br><input type="checkbox"/> No<br><input type="checkbox"/> Yes (e.g. twins, triplets, etc)                                                                                                                                                                                                                                    | <b>(If No in Q2) Do you breast feed your child?</b><br><input type="checkbox"/> Yes<br><input type="checkbox"/> No                  |
| <b>3. How many children do you already have from before?</b><br><input type="checkbox"/> None<br><input type="checkbox"/> One<br><input type="checkbox"/> Two<br><input type="checkbox"/> More than two                                                                                                                                                                         |                                                                                                                                     |
| <b>4. What is your marital status?</b><br><input type="checkbox"/> Married<br><input type="checkbox"/> Cohabitant<br><input type="checkbox"/> Single<br><input type="checkbox"/> Divorced/Separated<br><input type="checkbox"/> Other                                                                                                                                           |                                                                                                                                     |
| <b>5. What is the highest education you have completed?</b><br><input type="checkbox"/> Primary school (8-9 years of education)<br><input type="checkbox"/> High-school (11-13 years of education)<br><input type="checkbox"/> University<br><input type="checkbox"/> Other education                                                                                           |                                                                                                                                     |
| <b>6. What was your work situation when you became pregnant?</b><br><input type="checkbox"/> Student<br><input type="checkbox"/> Housewife<br><input type="checkbox"/> Health care personnel, i.e., physician, nurse, or pharmacist<br><input type="checkbox"/> Employed in another sector<br><input type="checkbox"/> Job seeker<br><input type="checkbox"/> None of the above |                                                                                                                                     |
| <b>7. Is English your mother tongue?</b><br><input type="checkbox"/> Yes<br><input type="checkbox"/> No                                                                                                                                                                                                                                                                         |                                                                                                                                     |
| <b>(If No in Q7 above) What is your mother tongue?</b> _____                                                                                                                                                                                                                                                                                                                    |                                                                                                                                     |
| <b>8. Your age: Years, from 15 to 55</b>                                                                                                                                                                                                                                                                                                                                        |                                                                                                                                     |



## INFORMATION ABOUT YOUR PREGNANCY

9. **(If pregnant)** Are you attending any pregnancy/birth preparation course or similar?

- Yes  
 No, but I am planning to attend  
 No, I am not going to attend it

10. **(If pregnant)** What are your thoughts about how the experience of giving birth is going to be?

Please indicate your thoughts in a scale from 1 to 6, where **1 corresponds to absolutely terrible and 6 to absolutely fantastic**

|                     |                          |                          |                          |                          |                          |                          |                      |
|---------------------|--------------------------|--------------------------|--------------------------|--------------------------|--------------------------|--------------------------|----------------------|
| Absolutely terrible | 1                        | 2                        | 3                        | 4                        | 5                        | 6                        | Absolutely fantastic |
|                     | <input type="checkbox"/> |                      |

11. Was your pregnancy planned?

- Yes  
 No, but it was not completely unexpected  
 No, it was not planned

12. Did you contact any healthcare provider due to infertility?

- Yes  
 No

**(If Yes in Q12 above)** Did you, in this pregnancy, become pregnant secondarily to infertility treatment?

- Yes  
 No

13. Have you taken folic acid? (alone or as part of multivitamins)

- Yes, before pregnancy  
 Yes, before and during pregnancy  
 Yes, only during pregnancy  
 No  
 cannot remember

14. Did you smoke cigarettes before becoming pregnant?

- Yes, regularly  
 Yes, occasionally  
 No, never

**(If yes in Q14 as regularly/occasionally)** Do you/did you smoke during pregnancy?

- Yes, more than before  
 Yes, approximately the same  
 Yes, but less  
 No

**(If yes)** How many cigarettes (on average) do you/did you smoke per day?

- < 1  
 1-5  
 6-10  
 > 11

15. Did you drink any alcohol after finding out that you were pregnant?

- Yes  
 No  
 Cannot remember

**(If yes) How much did you drink (in units)?**

1 alcohol unit is equivalent to:

one 25ml single measure of whisky (ABV 40%),

or a third of a pint of beer (ABV 5-6%)

or half a standard (175ml) glass of red wine (ABV 12%).

- More than 1-2 units per week
- 1-2 units per week
- 1-4 units per month
- 1-2 units during the pregnancy
- Can not remember

For peer review only

## HEALTH DISORDERS AND MEDICATIONS DURING PREGNANCY

**16. Have you experienced any of the disorders listed below during this pregnancy?  
If you use or have used any medicines in relation to [each health disorder listed]  
please enter the names of the medicines.  
In which weeks of pregnancy have you used them?**

| <b>Health disorder</b>                                                                               | <b>Medicine</b>                                                                                                                                      | <b>Period of use<br/>(pregnancy weeks)</b>                                                                              |
|------------------------------------------------------------------------------------------------------|------------------------------------------------------------------------------------------------------------------------------------------------------|-------------------------------------------------------------------------------------------------------------------------|
| Nausea<br><input type="checkbox"/> Yes<br><input type="checkbox"/> No                                | (If Nausea ticked) If you use or have used any medicines in relation to nausea, please enter the names of the medicines                              | <input type="checkbox"/> week 0-12<br><input type="checkbox"/> week 13-24<br><input type="checkbox"/> week 25- delivery |
| Heartburn or reflux problems<br><input type="checkbox"/> Yes<br><input type="checkbox"/> No          | (If Heartburn ticked) If you use or have used any medicines in relation to heartburn or reflux problem, please enter the names of the medicines      | <input type="checkbox"/> week 0-12<br><input type="checkbox"/> week 13-24<br><input type="checkbox"/> week 25- delivery |
| Constipation<br><input type="checkbox"/> Yes<br><input type="checkbox"/> No                          | (If Constipation ticked) If you use or have used any medicines in relation to constipation, please enter the names of the medicines                  | <input type="checkbox"/> week 0-12<br><input type="checkbox"/> week 13-24<br><input type="checkbox"/> week 25- delivery |
| Common cold<br><input type="checkbox"/> Yes<br><input type="checkbox"/> No                           | (If common cold ticked) If you use or have used any medicines in relation to common cold, please enter the names of the medicines                    | <input type="checkbox"/> week 0-12<br><input type="checkbox"/> week 13-24<br><input type="checkbox"/> week 25- delivery |
| Urinary tract infections<br><input type="checkbox"/> Yes<br><input type="checkbox"/> No              | (If UTI ticked) If you use or have used any medicines in relation to urinary tract infections, please enter the names of the medicines               | <input type="checkbox"/> week 0-12<br><input type="checkbox"/> week 13-24<br><input type="checkbox"/> week 25- delivery |
| Other infections<br><input type="checkbox"/> Yes<br><input type="checkbox"/> No                      | (If other infections ticked) If you use or have used any medicines in relation to other infections, please enter the names of the medicines          | <input type="checkbox"/> week 0-12<br><input type="checkbox"/> week 13-24<br><input type="checkbox"/> week 25- delivery |
| Pain in neck or back or pelvic girdle<br><input type="checkbox"/> Yes<br><input type="checkbox"/> No | (If pain ticked) If you use or have used any medicines in relation to pain in neck or back or pelvic girdle, please enter the names of the medicines | <input type="checkbox"/> week 0-12<br><input type="checkbox"/> week 13-24<br><input type="checkbox"/> week 25- delivery |
| Headache<br><input type="checkbox"/> Yes<br><input type="checkbox"/> No                              | (If headache ticked) If you use or have used any medicines in relation to headache, please enter the names of the medicines                          | <input type="checkbox"/> week 0-12<br><input type="checkbox"/> week 13-24<br><input type="checkbox"/> week 25- delivery |
| Sleeping problems<br><input type="checkbox"/> Yes<br><input type="checkbox"/> No                     | (If sleeping problems ticked) If you use or have used any medicines in relation to sleeping problems, please enter the names of the medicines        | <input type="checkbox"/> week 0-12<br><input type="checkbox"/> week 13-24<br><input type="checkbox"/> week 25- delivery |

1  
2  
3  
4  
5  
6  
7  
8  
9  
10  
11  
12  
13  
14  
15  
16  
17  
18  
19  
20  
21  
22  
23  
24  
25  
26  
27  
28  
29  
30  
31  
32  
33  
34  
35  
36  
37  
38  
39  
40  
41  
42  
43  
44  
45  
46  
47  
48  
49  
50  
51  
52  
53  
54  
55  
56  
57  
58  
59  
60

|                                                                                                              |                                           |
|--------------------------------------------------------------------------------------------------------------|-------------------------------------------|
| <b>17. Have you been on sick leave during this pregnancy?</b>                                                |                                           |
| <input type="checkbox"/> Yes                                                                                 | <input type="checkbox"/> No               |
| <b>18. (If yes in Q17) What was the reason for it? In which pregnancy weeks have you been on sick leave?</b> |                                           |
| <b>Reason of the sick leave</b>                                                                              | <b>Sick leave period (pregnancy week)</b> |
| _____                                                                                                        | <input type="checkbox"/> week 0-12        |
| _____                                                                                                        | <input type="checkbox"/> week 13-24       |
|                                                                                                              | <input type="checkbox"/> week 25-delivery |

|                                                                                                                                                   |                                                             |                                                                                                                                   |                                                                                                                         |
|---------------------------------------------------------------------------------------------------------------------------------------------------|-------------------------------------------------------------|-----------------------------------------------------------------------------------------------------------------------------------|-------------------------------------------------------------------------------------------------------------------------|
| <b>19. Below, some common over-the-counter (OTC) medicines are mentioned. Please indicate whether you have used any of them during pregnancy.</b> |                                                             |                                                                                                                                   |                                                                                                                         |
| <b>Please enter the name of all X medicines you have used. In which pregnancy weeks have you used them?</b>                                       |                                                             |                                                                                                                                   |                                                                                                                         |
|                                                                                                                                                   |                                                             | <b>Name of the medicine(s) you have used</b>                                                                                      | <b>Period of use (pregnancy week)</b>                                                                                   |
| Pain killers<br>(e.g. paracetamol)                                                                                                                | <input type="checkbox"/> Yes<br><input type="checkbox"/> No | (If painkillers ticked)<br>Please enter the name of all pain killers you have used during pregnancy.                              | <input type="checkbox"/> week 0-12<br><input type="checkbox"/> week 13-24<br><input type="checkbox"/> week 25- delivery |
| Nasal spray/drops<br>(excluding salt water solution)<br>(e.g. Otrivine, Vicks Sinex decongestant Nasal spray)                                     | <input type="checkbox"/> Yes<br><input type="checkbox"/> No | (If nasal spray ticked)<br>Please enter the name of all nasal sprays/drops you have used during pregnancy.                        | <input type="checkbox"/> week 0-12<br><input type="checkbox"/> week 13-24<br><input type="checkbox"/> week 25- delivery |
| Medication against heartburn<br>(e.g. Gaviscon or Rennie)                                                                                         | <input type="checkbox"/> Yes<br><input type="checkbox"/> No | (If OTC for heartburn ticked)<br>Please enter the name of all medications you have used against heartburn during pregnancy.       | <input type="checkbox"/> week 0-12<br><input type="checkbox"/> week 13-24<br><input type="checkbox"/> week 25- delivery |
| Medication against nausea/travel sickness (e.g. Cetirizine, Sea-Legs)                                                                             | <input type="checkbox"/> Yes<br><input type="checkbox"/> No | (If OTC for nausea ticked)<br>Please enter the name of all medications you have used against nausea during pregnancy.             | <input type="checkbox"/> week 0-12<br><input type="checkbox"/> week 13-24<br><input type="checkbox"/> week 25- delivery |
| Medication against constipation<br>(e.g. Lactulose, Dulcolax)                                                                                     | <input type="checkbox"/> Yes<br><input type="checkbox"/> No | (If OTC for constipation ticked)<br>Please enter the name of all medications you have used against constipation during pregnancy. | <input type="checkbox"/> week 0-12<br><input type="checkbox"/> week 13-24<br><input type="checkbox"/> week 25- delivery |

20. Did you take any herbal preparations during pregnancy (e.g. ginger, echinacea, valerian, cranberries)?

- Yes  No  Cannot remember

(If yes) Please provide the name of all herbal preparations you have taken during pregnancy.

(If yes) What was the reason for taking herbal preparations (health disorder, illness)?

(If yes) In which pregnancy weeks did you take herbal preparations?

| Name of herbal preparation used | Reason for use (health disorder, illness) | Period of use (pregnancy week)             |
|---------------------------------|-------------------------------------------|--------------------------------------------|
| _____                           | _____                                     | <input type="checkbox"/> week 0-12         |
| _____                           | _____                                     | <input type="checkbox"/> week 13-24        |
| _____                           | _____                                     | <input type="checkbox"/> week 25- delivery |
| _____                           | _____                                     | <input type="checkbox"/> week 0-12         |
| _____                           | _____                                     | <input type="checkbox"/> week 13-24        |
| _____                           | _____                                     | <input type="checkbox"/> week 25- delivery |

21. (If you used herbal preparations during pregnancy) Who recommended to you to take herbal preparations during pregnancy? (You may tick more than one answer)

- My own initiative  
 Family/friends  
 Physician  
 Midwife/Nurse  
 Pharmacy personnel  
 Herbal shop personnel  
 Internet  
 Magazines, media, etc.  
 Other (please specify: \_\_\_\_\_)

22. Did you use homeopathic products during pregnancy?

- Yes  No  Cannot remember

(If yes in Q22 above) What was the reason for use?

\_\_\_\_\_

**A BIT MORE ABOUT MEDICATION USE DURING PREGNANCY**

1  
2  
3  
4  
5  
6  
7  
8  
9  
10  
11  
12  
13  
14  
15  
16  
17  
18  
19  
20  
21  
22  
23  
24  
25  
26  
27  
28  
29  
30  
31  
32  
33  
34  
35  
36  
37  
38  
39  
40  
41  
42  
43  
44  
45  
46  
47  
48  
49  
50  
51  
52  
53  
54  
55  
56  
57  
58  
59  
60

**23. Have you deliberately avoided taking an over-the-counter medicine during your pregnancy?**

Yes

No

Cannot remember

**(If yes in Q23 above) Which medicine was it?**

---

**(If yes in Q23 above) What was the reason for doing so?**

---

---

**24. Have you deliberately chosen not to use a medicine prescribed by a doctor because you were pregnant?**

Yes

No

Can not remember

**(If yes in Q24 above) Which medicine was it?**

---

**(If yes in Q24 above) What was the reason for doing so?**

---

---

## YOUR NEEDS FOR INFORMATION

1  
2  
3 **25. Did you need information about medicines during the course of your pregnancy?**

- 4  Yes  No  Cannot remember

5  
6 **26. (If yes in Q25) Whom did you turn to for information? (You may tick more than one answer)**

- 7  
8  Family/friends  
9  Physician  
10  Midwife/Nurse  
11  Pharmacy personnel  
12  Herbal shop personnel  
13  Drug formulary/information leaflet  
14  Poison information centre  
15  Teratology information service  
16  National center of information on medicines  
17  Internet  
18  Magazines, media, etc  
19  Other (please specify: \_\_\_\_\_)

20  
21  
22 **27. (if yes in Q25) If you have obtained information from various sources, was such information similar?**

- 23  
24  Yes, completely similar  
25  Yes, as a whole (only the wording or detail level was somewhat different)  
26  No, part of the information was different  
27  No, the information was completely contradictory

28  
29 **28. (If No – last 2 options in Q27) If there were discrepancies among the sources, what did it mean to you? (You may tick more than one answer)**

- 30  
31  Nothing  
32  I became anxious  
33  I decided not to use the medication  
34  I sought for a new information source (Which new source have you consulted?  
35 \_\_\_\_\_)  
36  I chose to rely on one source and ignore the conflicting one (On which source have you  
37 relied? \_\_\_\_\_ Which source have you ignored? \_\_\_\_\_)

38  
39 **29. How often do you have someone help you read hospital materials?**

- 40  
41  Always  
42  Often  
43  Sometimes  
44  Occasionally  
45  Never

46  
47 **30. How confident are you filling out medical forms by yourself?**

- 48  Extremely  
49  Quite a bit  
50  Somewhat  
51  A little bit  
52  Not at all

53  
54 **31. How often do you have problems learning about your medical condition because of difficulty understanding written information?**

- 55  Always  
56  Often  
57  Sometimes  
58  Occasionally  
59  Never  
60

The following section will pop-up only if the subject has reported to be suffering from a chronic disease

## I. MEDICATIONS FOR CHRONIC DISEASES DURING PREGNANCY

If you use or have used medicines for a chronic disease during your pregnancy fill out this part of the questionnaire (I, II, III) and provide some information about those medicines you use daily.

*Some chronic diseases are asthma, allergy, hypothyroidism (low thyroid hormone), rheumatic diseases (incl. rheumatoid arthritis, psoriatic arthritis), diabetes (type I or II), epilepsy, depression, anxiety, cardiovascular diseases (incl. hypertension, high cholesterol, and heart diseases)*

Do you suffer of any chronic disease?  Yes  No

**(If Yes above) Please indicate whether you suffer of any of the following chronic diseases.**

|                                                                       |                                                             | <b>If you use or have used medicines for X during your pregnancy, please enter the name of the medicines.</b>                                       | <b>In which weeks of pregnancy did you use them?</b>                                                                   |
|-----------------------------------------------------------------------|-------------------------------------------------------------|-----------------------------------------------------------------------------------------------------------------------------------------------------|------------------------------------------------------------------------------------------------------------------------|
| Asthma                                                                | <input type="checkbox"/> Yes<br><input type="checkbox"/> No | (If Asthma ticked) If you use or have used medicines for asthma during pregnancy, please enter the names of the medicines.                          | <input type="checkbox"/> week 0-12<br><input type="checkbox"/> week 13-24<br><input type="checkbox"/> week 25-delivery |
| Allergy                                                               | <input type="checkbox"/> Yes<br><input type="checkbox"/> No | (If Allergy ticked) If you use or have used medicines for allergy during pregnancy, please enter the names of the medicines.                        | <input type="checkbox"/> week 0-12<br><input type="checkbox"/> week 13-24<br><input type="checkbox"/> week 25-delivery |
| Hypothyroidism (low thyroid hormone)                                  | <input type="checkbox"/> Yes<br><input type="checkbox"/> No | (If Hypothyroidism ticked) If you use or have used medicines for hypothyroidism during pregnancy, please enter the names of the medicines.          | <input type="checkbox"/> week 0-12<br><input type="checkbox"/> week 13-24<br><input type="checkbox"/> week 25-delivery |
| Rheumatic disorders (incl. rheumatoid arthritis, psoriatic arthritis) | <input type="checkbox"/> Yes<br><input type="checkbox"/> No | (If Rheumatic disorders ticked) If you use or have used medicines for rheumatic disorder during pregnancy, please enter the names of the medicines. | <input type="checkbox"/> week 0-12<br><input type="checkbox"/> week 13-24<br><input type="checkbox"/> week 25-delivery |
| Diabetes (type I or II)                                               | <input type="checkbox"/> Yes<br><input type="checkbox"/> No | (If Diabetes ticked) If you use or have used medicines for diabetes during pregnancy, please enter the names of the medicines.                      | <input type="checkbox"/> week 0-12<br><input type="checkbox"/> week 13-24<br><input type="checkbox"/> week 25-delivery |
| Epilepsy                                                              | <input type="checkbox"/> Yes<br><input type="checkbox"/> No | (If Epilepsy ticked) If you use or have used medicines for epilepsy during pregnancy, please enter the names of the medicines.                      | <input type="checkbox"/> week 0-12<br><input type="checkbox"/> week 13-24<br><input type="checkbox"/> week 25-delivery |
| Depression                                                            | <input type="checkbox"/> Yes<br><input type="checkbox"/> No | (If Depression ticked) If you use or have used medicines for depression, please enter the names of the medicines.                                   | <input type="checkbox"/> week 0-12<br><input type="checkbox"/> week 13-24<br><input type="checkbox"/> week 25-delivery |
| Anxiety                                                               | <input type="checkbox"/> Yes<br><input type="checkbox"/> No | (If Anxiety ticked) If you use or have used medicines for anxiety during pregnancy, please enter the names of the medicines.                        | <input type="checkbox"/> week 0-12<br><input type="checkbox"/> week 13-24<br><input type="checkbox"/> week 25-delivery |



|                                                                                |                                                             | <b>If you use or have used medicines for X during your pregnancy, please enter the name of the medicines.</b>                                       | <b>In which weeks of pregnancy did you use them?</b>                                                                   |
|--------------------------------------------------------------------------------|-------------------------------------------------------------|-----------------------------------------------------------------------------------------------------------------------------------------------------|------------------------------------------------------------------------------------------------------------------------|
| Cardiovascular diseases (incl. hypertension, high cholesterol, heart diseases) | <input type="checkbox"/> Yes<br><input type="checkbox"/> No | (If Cardio disease ticked) If you use or have used medicines for cardiovascular diseases during pregnancy, please enter the names of the medicines. | <input type="checkbox"/> week 0-12<br><input type="checkbox"/> week 13-24<br><input type="checkbox"/> week 25-delivery |
| Others (If Others ticked) (Please specify which other disease(s): _____)       | <input type="checkbox"/> Yes<br><input type="checkbox"/> No | (If Other disease ticked) If you use or have used medicines for your chronic disease during pregnancy, please enter the names of the medicines.     | <input type="checkbox"/> week 0-12<br><input type="checkbox"/> week 13-24<br><input type="checkbox"/> week 25-delivery |

For peer review only

1 Section II will pop-up only if the subject has reported to be suffering of a chronic disease  
2  
3

## 4 II. YOUR VIEWS ABOUT PRESCRIBED MEDICINES 5

6  
7 In this section of the survey questionnaire, the **Belief About Prescribed Medicine**  
8 **Questionnaire (BMQ-Specific)** was presented (Horne R, Weinman J, Hankins M. The  
9 beliefs about medicines questionnaire: The development and evaluation of a new method for  
10 assessing the cognitive representation of medication. Psychol Health. 1999;14(1):1-24).  
11  
12  
13  
14  
15  
16  
17  
18  
19  
20  
21  
22  
23  
24  
25  
26  
27  
28  
29  
30  
31  
32  
33  
34  
35  
36  
37  
38  
39  
40  
41  
42  
43  
44  
45  
46  
47  
48  
49  
50  
51  
52  
53  
54  
55  
56  
57  
58  
59  
60

For peer review only

1 Section III will pop-up only if the subject has reported to be suffering of a chronic disease.  
2 There will be one single scale for each chronic condition reported  
3  
4

5 **III. QUESTION ABOUT YOUR USE OF MEDICATIONS FOR X**  
6 **DURING PREGNANCY AND/OR POSTPARTUM**  
7  
8

9  
10 In this section of the survey questionnaire, the **8-item Morisky Medication Adherence**  
11 **Questionnaire (MMAS-8)** was presented (*Morisky DE, Green LW, Levine DM. Concurrent*  
12 *and predictive validity of a self-reported measure of medication adherence. Medical care.*  
13 *1986;24(1):67-74*).  
14  
15  
16  
17  
18  
19  
20  
21  
22  
23  
24  
25  
26  
27  
28  
29  
30  
31  
32  
33  
34  
35  
36  
37  
38  
39  
40  
41  
42  
43  
44  
45  
46  
47  
48  
49  
50  
51  
52  
53  
54  
55  
56  
57  
58  
59  
60

For peer review only

1  
2 **Do you have any other comments about your medication use during pregnancy?**  
3  
4  
5  
6  
7  
8  
9

---

---

---

---

---

10  
11  
12  
13  
14  
15  
16  
17  
18  
19  
20  
21  
22  
23  
24  
25  
26  
27  
28  
29  
30  
31  
32  
33  
34  
35  
36  
37  
38  
39  
40  
41  
42  
43  
44  
45  
46  
47  
48  
49  
50  
51  
52  
53  
54  
55  
56  
57  
58  
59  
60

For peer review only

## YOUR VIEWS ABOUT MEDICATIONS

In this section of the survey questionnaire, the **Belief About Medicine Questionnaire (BMQ-General)** was presented (*Horne R, Weinman J, Hankins M. The beliefs about medicines questionnaire: The development and evaluation of a new method for assessing the cognitive representation of medication. Psychol Health. 1999;14(1):1-24*).

For peer review only

1  
2  
3  
4  
5  
6  
7  
8  
9  
10  
11  
12  
13  
14  
15  
16  
17  
18  
19  
20  
21  
22  
23  
24  
25  
26  
27  
28  
29  
30  
31  
32  
33  
34  
35  
36  
37  
38  
39  
40  
41  
42  
43  
44  
45  
46  
47  
48  
49  
50  
51  
52  
53  
54  
55  
56  
57  
58  
59  
60

**32. Below are some statements about use of medicines in pregnancy.**

**Please specify how much you agree or disagree with these statements by ticking where appropriate. (You may only tick once per line)**

|                                                                                                                 | <b>Strongly agree</b> | <b>Agree</b>          | <b>Uncertain</b>      | <b>Disagree</b>       | <b>Strongly disagree</b> |
|-----------------------------------------------------------------------------------------------------------------|-----------------------|-----------------------|-----------------------|-----------------------|--------------------------|
| I have a higher threshold for using medicines when I am pregnant than when I'm not pregnant                     | <input type="radio"/>    |
| Even though I am ill and could have taken medicines, it is better for the foetus that I refrain from using them | <input type="radio"/>    |
| Pregnant women should preferably use herbal remedies than conventional medicines                                | <input type="radio"/>    |

For peer review only

## YOUR ASSESSMENT OF PREGNANCY RISKS

**33. Among 100 healthy women in a healthy environment, how many do you think will give birth to a child with a birth defect?**

**34. Here below is a list with various medicines, food and other substances.**

Please indicate how harmful you think they are for the foetus in a scale from 0 to 10, where 0 corresponds to 'not harmful' and 10 to 'very harmful'.

If you have not heard before about such substance, tick 'unknown substance'.

|                                                            | Unknown substance     | 0                     | 1                     | 2                     | 3                     | 4                     | 5                     | 6                     | 7                     | 8                     | 9                     | 10                    |
|------------------------------------------------------------|-----------------------|-----------------------|-----------------------|-----------------------|-----------------------|-----------------------|-----------------------|-----------------------|-----------------------|-----------------------|-----------------------|-----------------------|
| Paracetamol/acetaminophen                                  | <input type="radio"/> |
| Antibiotics (e.g. Penicillins)                             | <input type="radio"/> |
| Antidepressants                                            | <input type="radio"/> |
| Thalidomide                                                | <input type="radio"/> |
| Swine influenza vaccine                                    | <input type="radio"/> |
| OTC medicines against nausea/travel sickness               | <input type="radio"/> |
| Ginger                                                     | <input type="radio"/> |
| Cranberries                                                | <input type="radio"/> |
| Blue veined cheese (e.g. Gorgonzola)                       | <input type="radio"/> |
| Eggs                                                       | <input type="radio"/> |
| Alcohol during the 1. trimester (e.g. wine, beer, spirits) | <input type="radio"/> |
| Smoking (e.g. cigarettes)                                  | <input type="radio"/> |
| Dental X-ray                                               | <input type="radio"/> |

## HOW YOU ARE FEELING NOW

In this section of the survey questionnaire, the **Edinburgh Postnatal Depression Scale (EPDS)** was presented (Cox J, Holden J, Sagovsky R. *Detection of postnatal depression. Development of the 10-item edinburgh postnatal depression scale. The British Journal of Psychiatry.* 1987 June 1, 1987;150(6):782-6).

For peer review only



## HOW YOU SEE YOURSELF

In this section of the survey questionnaire, the **Big Five Inventory (BFI)** was presented (*John OP, Srivastava S, editors. The big five trait taxonomy: History, measurement, and theoretical perspectives: New York: Guilford; 1999; John OP, Robins RW, Pervin LA. Handbook of personality: Theory and research: The Guilford Press; 2008*).

For peer review only

**Appendix 2:** Websites used for recruitment and internet penetration rates in each country where data were collected

| <i>Country</i>         | <i>Website used for recruitment</i>                                                                                                                                                                               | <i>Internet penetration rates (%)</i> |
|------------------------|-------------------------------------------------------------------------------------------------------------------------------------------------------------------------------------------------------------------|---------------------------------------|
| <b>EUROPE</b>          |                                                                                                                                                                                                                   |                                       |
| <i>Western Europe</i>  |                                                                                                                                                                                                                   |                                       |
| <b>Austria</b>         | www.schwangerschaft.at; www.schwangerschafts-blog.at; www.fratz.at; www.netdoctor.at; www.babycenter.at; www.baby-boom.at; www.ekiz-dachverband.at; www.babyguide.at                                              | 93 <sup>*[1]</sup>                    |
| <b>France</b>          | www.aufeminin.com ( <i>Including ipad application to website subscribers</i> )                                                                                                                                    | 91 <sup>*[1]</sup>                    |
| <b>Italy</b>           | <i>Pregnancy Forums:</i> www.gravidanzaonline.it; www.forumsalute.it; www.mammole.it; www.pianetamamma.it; www.miobambino.it<br><br><i>Targeted email to pregnancy forum subscribers:</i> www.gravidanzaonline.it | 70 <sup>*[1]</sup>                    |
| <b>Switzerland</b>     | www.bebe-bebe.com; www.swissmom.ch                                                                                                                                                                                | 84 <sup>*[2]</sup>                    |
| <b>The Netherlands</b> | www.lareb.nl; www.gezondzwangerzijn.nl; www.babybytes.nl                                                                                                                                                          | 98 <sup>*[1]</sup>                    |
| <b>United Kingdom</b>  | <i>Targeted email to pregnancy forum subscribers:</i> www.bounty.com<br><br><i>Pregnancy Forums:</i> www.pregnancyforum.co.uk; www.pregnancyforum.org.uk                                                          | 93 <sup>*[1]</sup>                    |
| <i>Northern Europe</i> |                                                                                                                                                                                                                   |                                       |
| <b>Finland</b>         | www.vauva.fi; www.meidanperhe.fi; www.kaksplus.fi                                                                                                                                                                 | 99 <sup>*[1]</sup>                    |
| <b>Iceland</b>         | <i>Pregnancy Forums:</i> www.bland.is                                                                                                                                                                             | 100 <sup>*[1]</sup>                   |
| <b>Norway</b>          | www.barnimagen.com; www.klikk.no; www.jormorsiri.no; www.tryggmamamedisin.no                                                                                                                                      | 99 <sup>*[1]</sup>                    |
| <b>Sweden</b>          | www.barntotal.se; www.minbebis.com; www.se.babycenter.com; www.socmed.gu.se                                                                                                                                       | 99 <sup>*[1]</sup>                    |
| <i>Eastern Europe</i>  |                                                                                                                                                                                                                   |                                       |
| <b>Croatia</b>         | www.cybermed.hr                                                                                                                                                                                                   | 80 <sup>*[1]</sup> (data from 2010)   |
| <b>Poland</b>          | www.zzief.umlub.pl<br><br><i>Pregnancy Forums:</i> www.ebrzuszek.pl; www.babyboom.pl; www.zapytajpolozna.pl; www.planujemydziecko.pl; www.twoja-ciaza.com.pl                                                      | 84 <sup>*[1]</sup>                    |
| <b>Russia</b>          | www.babyblog.ru; www.littleone.ru                                                                                                                                                                                 | 48 <sup>*[2]</sup>                    |

| <i>Country</i>         | <i>Website used for recruitment</i>                                                                                                                                                      | <i>Internet penetration rates (%)</i> |
|------------------------|------------------------------------------------------------------------------------------------------------------------------------------------------------------------------------------|---------------------------------------|
|                        | <i>Pregnancy Forums: www.woman.ru; www.9months.ru; www.bemam; www.280dney.ru; www.iampregnant.ru; www.pregnancy.org.ua; www.baby.ru; www.mama66.ru; www.spuzom.ru</i>                    |                                       |
| <b>Serbia</b>          | www.ringeraja.rs                                                                                                                                                                         | 52* <sup>[1]</sup> (data from 2009)   |
| <b>Slovenia</b>        | <i>Pregnancy Forums: www.med.over.net</i>                                                                                                                                                | 92* <sup>[1]</sup>                    |
| <b>AMERICAS</b>        |                                                                                                                                                                                          |                                       |
| <i>North America</i>   |                                                                                                                                                                                          |                                       |
| <b>Canada</b>          | www.otispregnancy.org; Facebook page of OTIS; www.babyontheway.com.ca<br><br><i>Pregnancy Forums: www.babycentre.com.ca; www.thecradle.com; www.talk.sheknows.com; www.parenting.com</i> | 94 <sup>†</sup> <sup>[3]</sup>        |
| <b>USA</b>             | www.otispregnancy.org; Facebook page of OTIS; www.justmommies.com<br><br><i>Pregnancy Forums: www.babyandbump.com; www.thecradle.com; www.talk.sheknows.com; www.parenting.com</i>       | 80 <sup>§</sup> <sup>[4]</sup>        |
| <i>Central America</i> |                                                                                                                                                                                          |                                       |
| <b>Belize</b>          | www.otispregnancy.org; Facebook page of OTIS                                                                                                                                             | 23 <sup>[2]</sup>                     |
| <b>Costa Rica</b>      |                                                                                                                                                                                          | 43 <sup>[2]</sup>                     |
| <b>El Salvador</b>     |                                                                                                                                                                                          | 25 <sup>[2]</sup>                     |
| <b>Guatemala</b>       |                                                                                                                                                                                          | 16 <sup>[2]</sup>                     |
| <b>Honduras</b>        |                                                                                                                                                                                          | 16 <sup>[2]</sup>                     |
| <b>Nicaragua</b>       |                                                                                                                                                                                          | 14 <sup>[2]</sup>                     |
| <b>Panama</b>          |                                                                                                                                                                                          | 43 <sup>[2]</sup>                     |
| <i>South America</i>   |                                                                                                                                                                                          |                                       |
| <b>Argentina</b>       | www.otispregnancy.org; Facebook page of OTIS                                                                                                                                             | 67 <sup>[2]</sup>                     |
| <b>Bolivia</b>         |                                                                                                                                                                                          | 30 <sup>[2]</sup>                     |
| <b>Brazil</b>          | <i>Pregnancy Forums: www.semanaasemana.com;</i>                                                                                                                                          | 46 <sup>[2]</sup>                     |
| <b>Chile</b>           | www.univision.com; www.elembarazo.net                                                                                                                                                    | 59 <sup>[2]</sup>                     |
| <b>Colombia</b>        |                                                                                                                                                                                          | 59 <sup>[2]</sup>                     |
| <b>Ecuador</b>         |                                                                                                                                                                                          | 44 <sup>[2]</sup>                     |
| <b>Paraguay</b>        |                                                                                                                                                                                          | 24 <sup>[2]</sup>                     |
| <b>Peru</b>            |                                                                                                                                                                                          | 37 <sup>[2]</sup>                     |
| <b>Uruguay</b>         |                                                                                                                                                                                          | 56 <sup>[2]</sup>                     |
| <b>Venezuela</b>       |                                                                                                                                                                                          | 41 <sup>[2]</sup>                     |

| <i>Country</i>   | <i>Website used for recruitment</i>                                                                           | <i>Internet penetration rates (%)</i> |
|------------------|---------------------------------------------------------------------------------------------------------------|---------------------------------------|
| <b>AUSTRALIA</b> |                                                                                                               |                                       |
| <b>Australia</b> | www.mothersafe.org.au; www.bubhub.com.au<br><br><i>Pregnancy Forums:</i> www.abds.org.au;<br>www.birth.com.au | 83 <sup>‡</sup> [5]                   |

\*Indicates the frequency of internet access - at least once a week, including every day - among individuals aged 25- 34 years. Differences between men and women were relatively small. Slightly more than two thirds of men (70%) and 65% of women used the Internet regularly.

†Indicates individuals aged 16-45 years who used the internet for personal use.

§Indicates individuals > 18 years old, access from anywhere; household internet for women is equal to 68.1%; higher percentages are observed for people aged 25-54 years.

‡Indicates households with access to the internet at home.

#### Sources of internet penetration rates:

1. Seybert H. Internet use in households and by individuals in 2011. Eurostat Statistics in focus; 2011.
2. Internet World Stats. Usage and population statistics. Available at: <http://www.internetworldstats.com/>. Accessed 29 December, 2013.
3. Statistics Canada. Individual Internet use and E-commerce (2010). Available at: <http://www.statcan.gc.ca/daily-quotidien/111012/dq111012a-eng.htm>. Accessed 20 November, 2012.
4. United States Census Bureau. The 2012 Statistical Abstract. Information & Communications: Internet Publishing and Broadcasting and Internet Usage. Available at: [http://www.census.gov/compendia/statab/cats/information\\_communications/internet\\_publishing\\_and\\_broadcasting\\_and\\_internet\\_usage.html](http://www.census.gov/compendia/statab/cats/information_communications/internet_publishing_and_broadcasting_and_internet_usage.html). Accessed 13 November, 2012.
5. Australian Bureau of Statistics. Household Use of Information Technology, Australia, 2010-11 Available at: <http://www.abs.gov.au/ausstats/abs@.nsf/Latestproducts/8146.0Main%20Features12010-11?opendocument&tabname=Summary&prodno=8146.0&issue=2010-11&num=&view=>. Accessed 13 November, 2012.

Appendix 3: Socio-demographic characteristics of the study population and general birthing population on individual country

Appendix 3a: Socio-demographic characteristics in Western European countries (Switzerland, Italy and United Kingdom (UK))

|                                                       | Study sample<br>in Switzerland<br><br>n=618 | General<br>birthing<br>population in<br>Switzerland<br>LB=80,808 <sup>[1]</sup> | Study sample<br>in Italy<br><br>n=926 | General<br>birthing<br>population in<br>Italy<br>LB=546,606 <sup>[1]</sup> | Study sample<br>in the UK<br><br>n=1,120 | General<br>birthing<br>population in<br>UK*<br>LB=723,165 <sup>[2]</sup> |
|-------------------------------------------------------|---------------------------------------------|---------------------------------------------------------------------------------|---------------------------------------|----------------------------------------------------------------------------|------------------------------------------|--------------------------------------------------------------------------|
|                                                       | (%)                                         | (%)                                                                             | (%)                                   | (%)                                                                        | (%)                                      | (%)                                                                      |
| <b>No. of respondents/No. live births<sup>†</sup></b> | 4.6%                                        |                                                                                 | 1.0%                                  |                                                                            | 0.9%                                     |                                                                          |
| <b>Mean Age +/- sd</b>                                | 31.6 +/- 4.3                                | 31.4 <sup>[3]</sup>                                                             | 32.3 +/- 5.0                          | 31.3 <sup>[4]</sup>                                                        | 30.5 +/- 5.2                             | 29.6 <sup>[2]</sup>                                                      |
| <b>Marital status</b>                                 |                                             |                                                                                 |                                       |                                                                            |                                          |                                                                          |
| In marriage                                           | 80.0                                        | 80.7 <sup>[3]</sup>                                                             | 68.8                                  | 75.1 <sup>[1]</sup>                                                        | 63.3                                     | 53.2 <sup>[2]</sup>                                                      |
| Outside marriage                                      | 20.0                                        | 19.3 <sup>[3]</sup>                                                             | 31.2                                  | 31.5 <sup>[1]</sup>                                                        | 36.7                                     | 46.8 <sup>[2]</sup>                                                      |
| <b>Parity</b>                                         |                                             |                                                                                 |                                       |                                                                            |                                          |                                                                          |
| No previous children                                  | 53.2                                        | -                                                                               | 59.7                                  | 48.7 <sup>[5]</sup>                                                        | 48.0 <sup>†</sup>                        | 41.9 <sup>[2]</sup> †                                                    |
| <b>Educational level</b>                              |                                             |                                                                                 |                                       |                                                                            |                                          |                                                                          |
| Less than high school                                 | 11.0                                        | 11.7 <sup>[6]</sup>                                                             | 7.0                                   | 25.2 <sup>[6]</sup>                                                        | 0.6                                      | 16.5 <sup>[2]</sup>                                                      |
| High school                                           | 13.6                                        | 49.2 <sup>[6]</sup>                                                             | 47.2                                  | 49.2 <sup>[6]</sup>                                                        | 27.9                                     | 37.2 <sup>[2]</sup>                                                      |
| More than high school                                 | 47.2                                        | 39.1 <sup>[6]</sup>                                                             | 44.3                                  | 25.6 <sup>[6]</sup>                                                        | 52.1                                     | 46.3 <sup>[2]</sup>                                                      |
| Other                                                 | 28.2                                        | -                                                                               | 1.5                                   | -                                                                          | 19.3                                     | -                                                                        |
| <b>Women smoking before pregnancy</b>                 | 25.1                                        | 25.4 <sup>[7]</sup>                                                             | 34.2                                  | 33.3 <sup>[4]</sup>                                                        | 25.2                                     | 25.7 <sup>[7]</sup>                                                      |
| <b>Women smoking during pregnancy</b>                 | 5.5                                         | 6.6 <sup>[8]</sup>                                                              | 10.5                                  | 22.7 <sup>[9]</sup>                                                        | 7.1 <sup>‡</sup>                         | 13.2 <sup>[10]</sup> ‡                                                   |
| <b>Use of alcohol during pregnancy</b>                | 20.7                                        | 29.9 <sup>[8]</sup>                                                             | 17.9                                  | 17.7 <sup>[9]</sup>                                                        | 28.3                                     | 24.0 <sup>[11]</sup> §                                                   |

Abbreviations: LB: Number of live births per year.

\*The figures shown here are statistic estimates for England and Wales. Scotland and Northern Ireland have separate statistical reports. Since more than 85% of the study population in UK were resident in England and about 8% in Wales, we are only showing national statistic data for these two parts of the UK.

1  
2  
3  
4  
5 ¶The ratio “No. of respondents/No. live births” is calculated as the proportion (%) of pregnancies included in the study among live births in the country in two months (period  
6 of data collection).

7 †Among married women only – as provided by the Statistics Bureau in the UK.

8 ‡Among women resident in England only (as provided by the Statistics Bureau in the UK, data on 4<sup>th</sup> Quarter of 2011).

9 §Women reporting at least one occasion during pregnancy of consuming more than four drinks in a day.  
10  
11  
12  
13  
14  
15  
16  
17  
18  
19  
20  
21  
22  
23  
24  
25  
26  
27  
28  
29  
30  
31  
32  
33  
34  
35  
36  
37  
38  
39  
40  
41  
42  
43  
44  
45  
46  
47

1  
2  
3  
4  
5  
6  
7  
8  
9  
10  
11  
12  
13  
14  
15  
16  
17  
18  
19  
20  
21  
22  
23  
24  
25  
26  
27  
28  
29  
30  
31  
32  
33  
34  
35  
36  
37  
38  
39  
40  
41  
42  
43  
44  
45  
46  
47

**Appendix 3b:** Socio-demographic characteristics in Western European countries (Austria, France and The Netherlands)

|                                             | Study sample in Austria<br>n=82<br>(%) | General birthing population in Austria<br>LB=78,109 <sup>[1]</sup><br>(%) | Study sample in France<br>n=374<br>(%) | General birthing population in France<br>LB=824,263 <sup>[1]</sup><br>(%) | Study sample in The Netherlands<br>n=81<br>(%) | General birthing population in The Netherlands<br>LB=180,060 <sup>[1]</sup><br>(%) |
|---------------------------------------------|----------------------------------------|---------------------------------------------------------------------------|----------------------------------------|---------------------------------------------------------------------------|------------------------------------------------|------------------------------------------------------------------------------------|
| <i>No. of respondents/No. live births</i> * | 0.6%                                   |                                                                           | 0.3%                                   |                                                                           | 0.3%                                           |                                                                                    |
| <b>Mean Age +/- sd</b>                      | 30.6 +/- 4.6                           | 30.0 <sup>[12]</sup>                                                      | 29.6 +/- 4.9                           | 30.1 <sup>[13]</sup>                                                      | 32.0 +/- 6.4                                   | 31.0 <sup>[14]</sup>                                                               |
| <b>Marital status</b>                       |                                        |                                                                           |                                        |                                                                           |                                                |                                                                                    |
| In marriage                                 | 48.8                                   | 59.6 <sup>[15]</sup>                                                      | 48.9                                   | 45.0 <sup>[1]</sup>                                                       | 69.1                                           | 58.2 <sup>[14]</sup>                                                               |
| Outside marriage                            | 51.2                                   | 40.4 <sup>[15]</sup>                                                      | 51.1                                   | 55.0 <sup>[1]</sup>                                                       | 30.8                                           | 41.8 <sup>[14]</sup>                                                               |
| <b>Parity</b>                               |                                        |                                                                           |                                        |                                                                           |                                                |                                                                                    |
| No previous children                        | 63.4                                   | 47.96 <sup>[15]</sup>                                                     | 52.9                                   | 44.2 <sup>[16]</sup>                                                      | 38.3                                           | 46.4 <sup>[14]</sup>                                                               |
| <b>Educational level</b>                    |                                        |                                                                           |                                        |                                                                           |                                                |                                                                                    |
| Less than high school                       | 9.8                                    | 13.3 <sup>[6]</sup>                                                       | 1.6                                    | 15.4 <sup>[6]</sup>                                                       | 9.9                                            | 15.9 <sup>[6]</sup>                                                                |
| High-school                                 | 32.9                                   | 64.1 <sup>[6]</sup>                                                       | 25.1                                   | 37.4 <sup>[6]</sup>                                                       | 66.7                                           | 40.2 <sup>[6]</sup>                                                                |
| More than high school                       | 40.2                                   | 22.7 <sup>[6]</sup>                                                       | 57.0                                   | 47.2 <sup>[6]</sup>                                                       | 23.5                                           | 43.9 <sup>[6]</sup>                                                                |
| Other                                       | 17.1                                   | -                                                                         | 16.3                                   | -                                                                         | -                                              | -                                                                                  |
| <b>Women smoking before pregnancy</b>       | 31.7                                   | 32.1 <sup>[17]</sup>                                                      | 39.3                                   | 39.0 <sup>[16]</sup>                                                      | 34.6                                           | 29.5 <sup>[7]</sup>                                                                |
| <b>Women smoking during pregnancy</b>       | 4.9                                    | -                                                                         | 14.2                                   | 28.0 <sup>[16]</sup>                                                      | 14.8                                           | 17.1 <sup>[18]</sup>                                                               |
| <b>Use of alcohol during pregnancy</b>      | 13.4                                   | -                                                                         | 11.5                                   | 52.0 <sup>[19]</sup>                                                      | 11.1                                           | 16-35 <sup>[14]</sup>                                                              |

Abbreviations: LB: Number of live births per year.

\*The ratio “No. of respondents/No. live births” is calculated as the proportion (%) of pregnancies included in the study among live births in the country in two months (period of data collection).

**Appendix 3c:** Socio-demographic characteristics in Northern European countries (Norway, Finland and Sweden)

|                                            | Study sample in<br>Norway<br>n=1,228<br>(%) | General birthing<br>population in<br>Norway<br>LB=60,220 <sup>[11]</sup><br>(%) | Study sample<br>in Finland<br>n=574<br>(%) | General birthing<br>population in<br>Finland<br>LB=59,961 <sup>[11]</sup><br>(%) | Study sample<br>in Sweden<br>n=887<br>(%) | General birthing<br>population in<br>Sweden<br>LB=111,770 <sup>[11]</sup><br>(%) |
|--------------------------------------------|---------------------------------------------|---------------------------------------------------------------------------------|--------------------------------------------|----------------------------------------------------------------------------------|-------------------------------------------|----------------------------------------------------------------------------------|
| <b>No. of respondents/No. live births*</b> | 12.2%                                       |                                                                                 | 5.7%                                       |                                                                                  | 4.8%                                      |                                                                                  |
| <b>Mean Age +/- sd</b>                     | 29.0 +/- 4.6                                | 29.8 +/- 5.3 <sup>[20]</sup>                                                    | 29.0 +/- 5.1                               | 30.1 <sup>[21]</sup>                                                             | 29.8 +/- 5.3                              | 30.3 <sup>[22]</sup>                                                             |
| <b>Marital status</b>                      |                                             |                                                                                 |                                            |                                                                                  |                                           |                                                                                  |
| In marriage                                | 39.1                                        | 46.0 <sup>[20]</sup>                                                            | 59.4                                       | 57.8 <sup>[21]</sup>                                                             | 40.7                                      | 45.8 <sup>[1]</sup>                                                              |
| Outside marriage                           | 60.9                                        | 53.4 <sup>[20]</sup>                                                            | 40.6                                       | 42.0 <sup>[21]</sup>                                                             | 59.3                                      | 54.2 <sup>[1]</sup>                                                              |
| Unknown                                    | -                                           | 0.6 <sup>[20]</sup>                                                             | -                                          | 0.2 <sup>[21]</sup>                                                              |                                           |                                                                                  |
| <b>Parity</b>                              |                                             |                                                                                 |                                            |                                                                                  |                                           |                                                                                  |
| No previous children                       | 41.4                                        | 42.4 <sup>[20]</sup>                                                            | 35.5                                       | 42.2 <sup>[21]</sup>                                                             | 63.1                                      | 44.9 <sup>[22]</sup>                                                             |
| <b>Educational level</b>                   |                                             |                                                                                 |                                            |                                                                                  |                                           |                                                                                  |
| Less than high school                      | 4.5                                         | 14.7 <sup>[6]</sup>                                                             | 8.2                                        | 7.1 <sup>[6]</sup>                                                               | 5.2                                       | 11.1 <sup>[6]</sup>                                                              |
| High-school                                | 28.0                                        | 31.4 <sup>[6]</sup>                                                             | 36.4                                       | 44.5 <sup>[6]</sup>                                                              | 30.0                                      | 38.2 <sup>[6]</sup>                                                              |
| More than high school                      | 46.9                                        | 53.9 <sup>[6]</sup>                                                             | 52.6                                       | 48.4 <sup>[6]</sup>                                                              | 60.6                                      | 50.6 <sup>[6]</sup>                                                              |
| Other                                      | 20.7                                        | -                                                                               | 2.8                                        | -                                                                                | 4.2                                       | -                                                                                |
| <b>Women smoking before pregnancy</b>      | 33.5                                        | 36.5 <sup>[7]</sup>                                                             | 36.7                                       | 19.7 <sup>[7]</sup>                                                              | 25.0                                      | 27.2 <sup>[7]</sup>                                                              |
| <b>Women smoking during pregnancy</b>      | 6.8                                         | 7.0 <sup>[20]</sup>                                                             | 11.7                                       | 15.2 <sup>[21]</sup>                                                             | 5.4                                       | 6.5 <sup>[22]</sup>                                                              |
| <b>Use of alcohol during pregnancy</b>     | 4.1                                         | 7.4 <sup>[23]</sup>                                                             | 13.9                                       | -                                                                                | 7.2                                       | 5.9 <sup>[24]</sup>                                                              |

Abbreviations: LB: Number of live births per year.

\*The ratio "No. of respondents/No. live births" is calculated as the proportion (%) of pregnancies included in the study among live births in the country in two months (period of data collection).



**Appendix 3d:** Socio-demographic characteristics in Northern European countries (Iceland)

|                                                   | Study sample in<br>Iceland<br>n=71<br>(%) | General birthing<br>population in Iceland<br>LB=4,492 <sup>[1]</sup><br>(%) |
|---------------------------------------------------|-------------------------------------------|-----------------------------------------------------------------------------|
| <b><i>No. of respondents/No. live births*</i></b> | 9.3%                                      |                                                                             |
| <b><i>Age range (in years)</i></b>                |                                           |                                                                             |
| 15-20                                             | 11.3                                      | 5.1 <sup>[25]</sup>                                                         |
| 21-25                                             | 16.9                                      | 19.3 <sup>[25]</sup>                                                        |
| 26-30                                             | 42.3                                      | 34.2 <sup>[25]</sup>                                                        |
| 31-35                                             | 15.5                                      | 27.3 <sup>[25]</sup>                                                        |
| 36-40                                             | 12.7                                      | 11.7 <sup>[25]</sup>                                                        |
| ≥41                                               | 1.4                                       | 2.4 <sup>[25]</sup>                                                         |
| <b><i>Marital status</i></b>                      |                                           |                                                                             |
| In marriage                                       | 31.0                                      | 35.0 <sup>[25]</sup>                                                        |
| Outside marriage                                  | 69.0                                      | 65.0 <sup>[25]</sup>                                                        |
| <b><i>Parity</i></b>                              |                                           |                                                                             |
| No previous children                              | 47.9                                      | 38.1 <sup>[25]</sup>                                                        |
| <b><i>Educational level</i></b>                   |                                           |                                                                             |
| Less than high school                             | 25.4                                      | 21.4 <sup>[6]</sup>                                                         |
| High-school                                       | 18.3                                      | 30.5 <sup>[6]</sup>                                                         |
| More than high school                             | 43.7                                      | 48.1 <sup>[6]</sup>                                                         |
| Other                                             | 12.7                                      | -                                                                           |
| <b><i>Women smoking before pregnancy</i></b>      | 40.8                                      | 35.5 <sup>[7]</sup>                                                         |

Abbreviations: LB: Number of live births per year.

\*The ratio "No. of respondents/No. live births" is calculated as the proportion (%) of pregnancies included in the study among live births in the country in two months (period of data collection).

**Appendix 3e:** Socio-demographic characteristics in Eastern European countries (Croatia, Slovenia and Serbia)

|                                                        | Study sample in<br>Croatia<br>n=286<br><b>n (%)</b> | General birthing<br>population in<br>Croatia<br>LB=41,197 <sup>[1]</sup><br><b>(%)</b> | Study sample in<br>Slovenia<br>n=149<br><b>n (%)</b> | General birthing<br>population in<br>Slovenia<br>LB=21,947 <sup>[1]</sup><br><b>(%)</b> | Study sample in<br>Serbia<br>n=220<br><b>n (%)</b> | General birthing<br>population in<br>Serbia<br>LB=65,598 <sup>[1]</sup><br><b>(%)</b> |
|--------------------------------------------------------|-----------------------------------------------------|----------------------------------------------------------------------------------------|------------------------------------------------------|-----------------------------------------------------------------------------------------|----------------------------------------------------|---------------------------------------------------------------------------------------|
| <i>No. of respondents/No. live births</i> <sup>*</sup> | 4.2%                                                |                                                                                        | 4.1%                                                 |                                                                                         | 2.0%                                               |                                                                                       |
| <i>Mean Age +/- sd</i>                                 | 29.1 +/- 4.5 <sup>†</sup>                           | 27.7 <sup>[26]</sup>                                                                   | 31.7 +/- 4.5                                         | 30.4 <sup>[27]</sup>                                                                    | 29.2 +/- 3.9 <sup>*</sup>                          | 28.7 <sup>[1,28]</sup>                                                                |
| <b>Marital status</b>                                  |                                                     |                                                                                        |                                                      |                                                                                         |                                                    |                                                                                       |
| In marriage                                            | 83.9                                                | 86.7 <sup>[26]</sup>                                                                   | 47.0                                                 | 43.2 <sup>[27]</sup>                                                                    | 90.1                                               | 76.1 <sup>[28]</sup>                                                                  |
| Outside marriage                                       | 16.1                                                | 13.3 <sup>[26]</sup>                                                                   | 53.0                                                 | 56.8 <sup>[27]</sup>                                                                    | 9.9                                                | 23.9 <sup>[28]</sup>                                                                  |
| <b>Parity</b>                                          |                                                     |                                                                                        |                                                      |                                                                                         |                                                    |                                                                                       |
| No previous children                                   | 50.7                                                | 46.9 <sup>[26]</sup>                                                                   | 45.6                                                 | 48.5 <sup>[27]</sup>                                                                    | 46.8                                               | 51.1 <sup>[28,29]</sup>                                                               |
| <b>Educational level</b>                               |                                                     |                                                                                        |                                                      |                                                                                         |                                                    |                                                                                       |
| Less than high school                                  | 1.0                                                 | 3.1 <sup>[26]</sup>                                                                    | 2.0                                                  | 8.5 <sup>[27]</sup>                                                                     | 0.9                                                | 15.9 <sup>[29]</sup>                                                                  |
| High-school                                            | 36.7                                                | 52.5 <sup>[26]</sup>                                                                   | 24.8                                                 | 48.5 <sup>[27]</sup>                                                                    | 33.6                                               | 54.9 <sup>[29]</sup>                                                                  |
| More than high school                                  | 61.2                                                | 44.4 <sup>[26]</sup>                                                                   | 69.1                                                 | 43.0 <sup>[27]</sup>                                                                    | 61.8                                               | 29.2 <sup>[29]</sup>                                                                  |
| Other                                                  | 1.0                                                 | -                                                                                      | 4.0                                                  | -                                                                                       | 3.6                                                | -                                                                                     |
| <i>Women smoking before pregnancy</i>                  | 50.0                                                | 34.4 <sup>[26]</sup>                                                                   | 32.9                                                 | 34.4 <sup>[7]</sup>                                                                     | 49.1                                               | 29.9 <sup>[30,31]</sup>                                                               |
| <i>Women smoking during pregnancy</i>                  | 18.8                                                | 23.1 <sup>[32]</sup>                                                                   | 6.7                                                  | 9.6-11.2 <sup>[33]</sup>                                                                | 18.2                                               | 18.4 <sup>[31]</sup>                                                                  |
| <i>Use of alcohol during pregnancy</i>                 | 12.6                                                | 15.5 <sup>[34]</sup>                                                                   | 32.2                                                 | -                                                                                       | 15.0                                               | -                                                                                     |

Abbreviations: LB: Number of live births per year.

<sup>\*</sup> The ratio "No. of respondents/No. live births" is calculated as the proportion (%) of pregnancies included in the study among live births in the country in two months (period of data collection).

<sup>†</sup>Mean age for first child (as it is available from the Statistics Bureau reports in Croatia and Serbia).

**Appendix 3f: Socio-demographic characteristics in Eastern European countries (Poland and Russia)**

|                                            | Study sample in<br>Poland<br>n=679 | General birthing<br>population in Poland<br>LB=388,416 <sup>[1]</sup> | Study sample in<br>Russia<br>n=1,008 | General birthing<br>population in Russia<br>LB=1,796,629 <sup>[1]</sup> |
|--------------------------------------------|------------------------------------|-----------------------------------------------------------------------|--------------------------------------|-------------------------------------------------------------------------|
|                                            | (%)                                | (%)                                                                   | (%)                                  | (%)                                                                     |
| <i>No. of respondents/No. live births*</i> | 1.0%                               |                                                                       | 0.3%                                 |                                                                         |
| <i>Mean Age +/- sd</i>                     | 27.1 +/- 4.1                       | 28.6 <sup>[35]</sup> †                                                | 27.7 +/- 4.8                         | 27.4 <sup>[36]</sup>                                                    |
| <b>Marital status</b>                      |                                    |                                                                       |                                      |                                                                         |
| In marriage                                | 85.0                               | 79.4 <sup>[35]</sup>                                                  | 85.3                                 | 73.9 <sup>[36]</sup>                                                    |
| Outside marriage                           | 15.0                               | 20.6 <sup>[35]</sup>                                                  | 14.7                                 | 26.1 <sup>[36]</sup>                                                    |
| <b>Parity</b>                              |                                    |                                                                       |                                      |                                                                         |
| No previous children                       | 40.6                               | 50.1 <sup>[35]</sup>                                                  | 57.9                                 | -                                                                       |
| <b>Educational level</b>                   |                                    |                                                                       |                                      |                                                                         |
| Less than high school                      | 1.9                                | 8.7 <sup>[35]</sup>                                                   | 1.6                                  | -                                                                       |
| High-school                                | 31.1                               | 49.6 <sup>[35]</sup>                                                  | 9.3                                  | -                                                                       |
| More than high school                      | 65.1                               | 41.6 <sup>[35]</sup>                                                  | 75.1                                 | -                                                                       |
| Other                                      | 1.9                                | -                                                                     | 14.0                                 | -                                                                       |
| <b>Women smoking before pregnancy</b>      | 49.2                               | 25.0 <sup>[37]</sup>                                                  | 46.1                                 | 30.8 <sup>[38]</sup>                                                    |
| <b>Women smoking during pregnancy</b>      | 12.8                               | 22-30 <sup>[37]</sup>                                                 | 9.6                                  | 4.3-6.5 <sup>[39,40]</sup>                                              |
| <b>Use of alcohol during pregnancy</b>     | 9.6                                | 15.3 <sup>[41]</sup>                                                  | 26.0                                 | 60.0 <sup>[42]</sup>                                                    |

Abbreviations: LB: Number of live births per year.

\* The ratio “No. of respondents/No. live births” is calculated as the proportion (%) of pregnancies included in the study among live births in the country in two months (period of data collection).

† Median age of women at birth, not mean age.

**Appendix 3g:** Socio-demographic characteristics in North American countries (Canada and USA)

|                                                   | Study sample<br>in Canada | General birthing<br>population in<br>Canada <sup>[43]</sup> | Study sample in The<br>USA | General birthing<br>population in USA <sup>[44]</sup> |
|---------------------------------------------------|---------------------------|-------------------------------------------------------------|----------------------------|-------------------------------------------------------|
|                                                   | n=236                     | LB=377,636                                                  | n=297                      | LB=3,999,386                                          |
|                                                   | n (%)                     | (%)                                                         | n (%)                      | (%)                                                   |
| <b><i>No. of respondents/No. live births*</i></b> | 0.4%                      |                                                             | 0.04%                      |                                                       |
| <b><i>Age range (in years)</i></b>                |                           |                                                             |                            |                                                       |
| 15-19                                             | 2.1                       | 3.9 <sup>[43]</sup>                                         | 4.7                        | 9.3 <sup>[44]</sup>                                   |
| 20-24                                             | 25.0                      | 14.6 <sup>[43]</sup>                                        | 18.2                       | 23.8 <sup>[44]</sup>                                  |
| 25-29                                             | 30.1                      | 30.2 <sup>[43]</sup>                                        | 28.3                       | 28.3 <sup>[44]</sup>                                  |
| 30-34                                             | 30.5                      | 32.2 <sup>[43]</sup>                                        | 29.3                       | 24.1 <sup>[44]</sup>                                  |
| 35-39                                             | 11.0                      | 15.6 <sup>[43]</sup>                                        | 15.2                       | 11.6 <sup>[44]</sup>                                  |
| 40-44                                             | 1.3                       | 3.1 <sup>[43]</sup>                                         | 4.0                        | 2.7 <sup>[44]</sup>                                   |
| ≥45                                               | -                         | 0.2 <sup>[43]</sup>                                         | 0.3                        | 0.2 <sup>[44]</sup>                                   |
| <b><i>Mean Age +/- sd</i></b>                     | 28.3 +/- 5.2              | 29.6 <sup>[43]</sup>                                        | 29.3 +/- 6.1               | -                                                     |
| <b><i>Marital status</i></b>                      |                           |                                                             |                            |                                                       |
| In marriage                                       | 42.4                      | 60.4 <sup>[43]</sup>                                        | 67.0                       | 59.2 <sup>[45]</sup>                                  |
| Outside marriage                                  | 57.6                      | 28.8 <sup>[43]</sup>                                        | 33.0                       | 39.9 <sup>[45]</sup>                                  |
| Unknown                                           | -                         | 10.8 <sup>[43]</sup>                                        | -                          | 0.9 <sup>[45]</sup>                                   |
| <b><i>Parity</i></b>                              |                           |                                                             |                            |                                                       |
| No previous children                              | 48.3                      | 43.3 <sup>[43]</sup>                                        | 41.1                       | 40.1 <sup>[44]</sup>                                  |
| <b><i>Educational level</i></b>                   |                           |                                                             |                            |                                                       |
| Less than high school                             | 1.3                       | 8.4 <sup>[46]</sup>                                         | 2.7                        | 17.4 <sup>[47]</sup>                                  |
| High-school                                       | 24.6                      | -                                                           | 25.3                       | 24.4 <sup>[47]</sup>                                  |
| More than high school                             | 67.8                      | 69.6 <sup>[46]</sup>                                        | 62.0                       | 58.2 <sup>[47]</sup>                                  |
| Other                                             | 6.4                       | -                                                           | 10.1                       | -                                                     |

1  
2  
3  
4  
5  
6  
7  
8  
9  
10  
11  
12  
13  
14  
15  
16  
17  
18  
19  
20  
21  
22  
23  
24  
25  
26  
27  
28  
29  
30  
31  
32  
33  
34  
35  
36  
37  
38  
39  
40  
41  
42  
43  
44  
45  
46  
47

|                                               | Study sample<br>in Canada | General birthing<br>population in<br>Canada <sup>[43]</sup> | Study sample in The<br>USA | General birthing<br>population in USA <sup>[44]</sup> |
|-----------------------------------------------|---------------------------|-------------------------------------------------------------|----------------------------|-------------------------------------------------------|
|                                               | n=236<br>n (%)            | LB=377,636<br>(%)                                           | n=297<br>n (%)             | LB=3,999,386<br>(%)                                   |
| <b><i>Women smoking before pregnancy</i></b>  | 29.2                      | 22.0 <sup>[48]</sup>                                        | 28.3                       | 21.5 <sup>[49]</sup>                                  |
| <b><i>Women smoking during pregnancy</i></b>  | 16.1                      | 13.4 <sup>[46]</sup>                                        | 8.1                        | 10.2 <sup>[50]</sup>                                  |
| <b><i>Use of alcohol during pregnancy</i></b> | 16.1                      | 10.5 <sup>[46]</sup>                                        | 17.5                       | 15.5 <sup>[49]</sup>                                  |

Abbreviations: LB: Number of live births per year.

\*The ratio “No. of respondents/No. live births” is calculated as the proportion (%) of pregnancies included in the study among live births in the country in two months (period of data collection).

**Appendix 3h: Socio-demographic characteristics in Australia**

|                                                   | Study sample in<br>Australia<br>n=217 | General birthing<br>population in<br>Australia <sup>[51]</sup><br>LB=301,617 |
|---------------------------------------------------|---------------------------------------|------------------------------------------------------------------------------|
|                                                   | <b>n (%)</b>                          | <b>(%)</b>                                                                   |
| <b><i>No. of respondents/No. live births*</i></b> | 0.4%                                  |                                                                              |
| <b><i>Mean Age +/- sd</i></b>                     | 31.1 +/- 5.7                          | 30.7 <sup>[51]</sup>                                                         |
| <b><i>Marital status</i></b>                      |                                       |                                                                              |
| In marriage                                       | 70.5                                  | 65.8 <sup>[51]</sup>                                                         |
| Outside marriage                                  | 29.5                                  | 34.2 <sup>[51]</sup>                                                         |
| <b><i>Parity</i></b>                              |                                       |                                                                              |
| No previous children                              | 47.9                                  | 43.8 <sup>[51]</sup>                                                         |
| <b><i>Educational level</i></b>                   |                                       |                                                                              |
| Less than high school                             | 0.5                                   | 20.6 <sup>† [52]</sup>                                                       |
| High-school                                       | 29.0                                  |                                                                              |
| More than high school                             | 63.1                                  | 56.0 <sup>[53]</sup>                                                         |
| Other                                             | 7.4                                   | -                                                                            |
| <b><i>Women smoking before pregnancy</i></b>      | 29.1                                  | 29.9 <sup>[54]</sup>                                                         |
| <b><i>Women smoking during pregnancy</i></b>      | 14.3                                  | 14.5 <sup>[55]</sup>                                                         |
| <b><i>Use of alcohol during pregnancy</i></b>     | 27.2                                  | 29.0 <sup>[56]</sup>                                                         |

Abbreviations: LB: Number of live births per year.

\*The ratio “No. of respondents/No. live births” is calculated as the proportion (%) of pregnancies included in the study among live births in the country in two months (period of data collection).

†Refers to the educational levels “high school” and “less than high school” grouped together.

**Sources of socio-demographic characteristics of the general birthing population:**

1. Eurostat. Live births by mother's age at last birthday and legal marital status. Available at: [http://appsso.eurostat.ec.europa.eu/nui/show.do?dataset=demo\\_fagec&lang=en](http://appsso.eurostat.ec.europa.eu/nui/show.do?dataset=demo_fagec&lang=en). Accessed 6 November, 2012.
2. UK National Statistics. Characteristics of Birth 1 and 2/of mother 1 and 2, England and Wales. 2010. Available at: <http://www.statistics.gov.uk/hub/population/births-and-fertility/maternities/index.html>. Accessed 12 November, 2012.
3. Swiss Statistics. Components of population change – Data, indicators. Available at: <http://www.bfs.admin.ch/bfs/portal/en/index/themen/01/06/blank/key/01.html>. Accessed 6 November, 2012.
4. Istat - Istituto nazionale di statistica. Demography in figures. 2011. Available at: [http://demo.istat.it/index\\_e.html](http://demo.istat.it/index_e.html). Accessed 6 November, 2012.
5. Donati S, Baglio G, Spinelli A, et al. Drug use in pregnancy among Italian women. *Eur J Clin Pharmacol* 2000;**56**(4):323-8.
6. Eurostat. Persons with a given education attainment level by sex and age groups (%). Available at: [http://epp.eurostat.ec.europa.eu/portal/page/portal/product\\_details/dataset?p\\_product\\_code=EDAT\\_LFS\\_9903](http://epp.eurostat.ec.europa.eu/portal/page/portal/product_details/dataset?p_product_code=EDAT_LFS_9903). Accessed 6 November, 2012.
7. Eurostat. Smokers by sex. Available at: [http://epp.eurostat.ec.europa.eu/portal/page/portal/product\\_details/dataset?p\\_product\\_code=TPS00169](http://epp.eurostat.ec.europa.eu/portal/page/portal/product_details/dataset?p_product_code=TPS00169). Accessed 6 November, 2012.
8. Lemola S, Grob A. Drinking and smoking in pregnancy: what questions do Swiss physicians ask? *Swiss Med Wkly* 2007;**137**(3-4):66-9.
9. De Santis M, De Luca C, Mappa I, et al. Smoke, alcohol consumption and illicit drug use in an Italian population of pregnant women. *Eur J Obstet Gynecol Reprod Biol* 2011;**159**(1):106-10.
10. The Health and Social Care Information Centre. Statistics on women's smoking status at time of delivery: England, Quarter 1, 2012/13. 2012. Available at: <http://www.ic.nhs.uk/pubs/wsstd1213q1>. Accessed 12 November, 2012.
11. Sayal K, Heron J, Golding J, et al. Binge pattern of alcohol consumption during pregnancy and childhood mental health outcomes: longitudinal population-based study. *Pediatrics* 2009;**123**(2):e289-96.
12. Statistics Austria. Births. Long-term and current final annual results. 2011. Available at: [http://www.statistik.at/web\\_en/statistics/population/births/index.html](http://www.statistik.at/web_en/statistics/population/births/index.html). Accessed November 6th, 2012.
13. National Institute of Statistics and Economic Studies INSEE. Population. Available at: <http://www.insee.fr/en/themes/theme.asp?theme=2>. Accessed 7 November, 2012.
14. Statline, Centraal Bureaus voor de Statistiek. Population. 2012. Available at: <http://www.cbs.nl/en-GB/menu/themas/bevolking/nieuws/default.htm>. Accessed 10 November, 2012.
15. STATcube - Statistical Database of Statistics Austria. Available at: <http://statcube.at/superweb/login.do?guest=guest>. Accessed 6 November, 2012.
16. Menai M, Heude B, Slama R, et al. Association between maternal blood cadmium during pregnancy and birth weight and the risk of fetal growth restriction: The EDEN mother-child cohort study. *Reprod Toxicol* 2012;**34**(4):622-27.
17. Jahrbuch der GESUNDHEITSSTATISTIK. Wein: Statistika Austria. 2011.
18. Leermakers ET, Taal HR, Bakker R, et al. A common genetic variant at 15q25 modifies the associations of maternal smoking during pregnancy with fetal growth: the generation R study. *PLoS One* 2012;**7**(4):e34584.
19. de Chazeron I, Llorca PM, Ughetto S, et al. Is pregnancy the time to change alcohol consumption habits in France? *Alcohol Clin Exp Res* 2008;**32**(5):868-73.
20. Norwegian Institute of Public Health. Medisinsk fødselsregisters statistikkbank - statistikk om alle fødsler i Norge. 2011. Available at: <http://mfr-nesstar.uib.no/mfr/>. Accessed 6 November, 2012.
21. The National Institute for Health and Welfare, Helsinki Finland. Liitetaulukot - Bilagetabeller - Appendix Tables, 2010.

22. Heino A, Gissler M. Nordic Perinatal Statistics 2010: National Institute for Health and Welfare. Helsinki, Finland. 2012.
23. Ystrom E, Vollrath ME, Nordeng H. Effects of personality on use of medications, alcohol, and cigarettes during pregnancy. *Eur J Clin Pharmacol* 2012;**68**(5):845-51.
24. Nilsen P, Holmqvist M, Hultgren E, et al. Alcohol use before and during pregnancy and factors influencing change among Swedish women. *Acta Obstet Gynecol Scand* 2008;**87**(7):768-74.
25. Births and Deaths. Statistics Iceland. Available at: <http://www.statice.is/Statistics/Population/Births-and-deaths>. Accessed 6 November, 2012.
26. Statistical Yearbook of the Republic of Croatia. Zagreb: Croatian Bureau of Statistics, 2011.
27. Statistical Office of the Republic of Slovenia. SI-STAT Data Portal. Population. Available at: <http://pxweb.stat.si/pxweb/Database/Demographics/Demographics.asp>. Accessed 7 November, 2012.
28. Statistical Yearbook of the Republic of Serbia. Demographic Yearbook in Republic of Serbia. Belgrade: Statistical Office of the Republic of Serbia, 2011.
29. Krstev S, Marinkovic J, Simic S, et al. Prevalence and predictors of smoking and quitting during pregnancy in Serbia: results of a nationally representative survey. *Int J Public Health* 2011.
30. Statistical Office of the Republic of Serbia. Women and Men in the Republic of Serbia, Belgrade, 2011.
31. Odalovic M, Vezmar Kovacevic S, Ilic K, et al. Drug use before and during pregnancy in Serbia. *Int J Clin Pharm* 2012;**34**(5):719-27.
32. Strinic T, Bukovic D, Sumilin L, et al. Socio-demographic characteristics and lifestyle habits of pregnant women smokers. *Coll Antropol* 2005;**29**(2):611-4.
33. Antolič B, Geršak K, Verdenik I, et al. Adverse effects of thyroid dysfunction on pregnancy and pregnancy outcome: Epidemiologic study in Slovenia. *Journal of Maternal-Fetal and Neonatal Medicine* 2006;**19**(10):651-54.
34. Petkovic G, Barisic I. FAS prevalence in a sample of urban schoolchildren in Croatia. *Reprod Toxicol* 2010;**29**(2):237-41.
35. Demographic Yearbook of Poland. Warsaw: Central Statistical Office of Poland, 2011.
36. The Demographic Yearbook of Russia - statistical handbook. Moscow: Federal State Statistics Service (Rosstat), 2010.
37. Przewoźniak K, Zatoński W. Ekspertyza „zachowania zdrowotne kobiet w ciąży”. Warszawa: Zakład Epidemiologii i Prewencji Nowotworów, Centrum Onkologii – Instytut w Warszawie. Posiedzenie Plenarne Rady Naukowej przy Ministrze Zdrowia, Ministerstwo Zdrowia, 2010.
38. Current tobacco use and secondhand smoke exposure among women of reproductive age - 14 countries, 2008-2010. *MMWR Morb Mortal Wkly Rep* 2012;**61**:877-82.
39. Kelmanson IA, Erman LV, Litvina SV. Maternal smoking during pregnancy and behavioural characteristics in 2 - 4-month-old infants. *Klin Padiatr* 2002;**214**(6):359-64.
40. Hugg TT, Jaakkola MS, Ruotsalainen RO, et al. Parental smoking behaviour and effects of tobacco smoke on children's health in Finland and Russia. *Eur J Public Health* 2008;**18**(1):55-62.
41. Wojtyła A, Kapka-Skrzypczak L, Diatczyk J, et al. Alcohol-related Developmental Origin of Adult Health - population studies in Poland among mothers and newborns (2010-2012). *Ann Agric Environ Med* 2012;**19**(3):365-77.
42. Kristjanson AF, Wilsnack SC, Zvartau E, et al. Alcohol use in pregnant and nonpregnant Russian women. *Alcohol Clin Exp Res* 2007;**31**(2):299-307.
43. Statistics Canada. Births. 2010. Available at: <http://www.statcan.gc.ca/daily-quotidien/111220/dq111220g-eng.htm>. Accessed 12 November 2012.
44. Hamilton B, Martin J, Ventura S. National Vital Statistics Reports. Births: Preliminary Data for 2010: U.S. Department of health and human services. Centers for Disease Control and Prevention. National Center for Health Statistics. National Vital Statistics System, 2011.
45. OECD. Panorama de la société 2011: OECD Publishing.
46. Canadian Perinatal Health Report, 2008 Edition. Ottawa: Public Health Agency of Canada, 2008.
47. The 2012 Statistical Abstract. The National Data Book. Women With Births in the Past 12 Months by Citizenship Status, Educational Attainment, and Poverty Status, by State. 2009. Available at: [http://www.census.gov/compendia/statab/cats/births\\_deaths\\_marriages\\_divorces/births.html](http://www.census.gov/compendia/statab/cats/births_deaths_marriages_divorces/births.html). Accessed 12 November, 2012.
48. Public Health Agency of Canada. What Mothers Say: The Canadian Maternity Experiences Survey. Ottawa, 2009.



1  
2  
3  
4  
5  
6  
7  
8  
9  
10  
11  
12  
13  
14  
15  
16  
17  
18  
19  
20  
21  
22  
23  
24  
25  
26  
27  
28  
29  
30  
31  
32  
33  
34  
35  
36  
37  
38  
39  
40  
41  
42  
43  
44  
45  
46  
47

49. Substance Abuse and Mental Health Services Administration, Results from the 2010 National Survey on Drug Use and Health: Summary of National Findings. NSDUH Series H-41, HHS Publication No. (SMA) 11-4658. Rockville, MD: Substance Abuse and Mental Health Services Administration, 2011.
50. Health, United States, 2011: With Special Feature on Socioeconomic Status and Health. Hyattsville, MD: National Center for Health Statistics, 2012.
51. Australian Bureau of Statistics. Births, Australia. 2011. Available at: <http://www.abs.gov.au/AUSSTATS/abs@.nsf/mf/3301.0>. Accessed 13 November, 2012.
52. Sawicki E, Stewart K, Wong S, et al. Medication use for chronic health conditions by pregnant women attending an Australian maternity hospital. *Aust N Z J Obstet Gynaecol* 2011;**51**(4):333-38.
53. Australian Bureau Statistics. Australian Social Trends, Sep 2012. 2012; Available at: <http://www.abs.gov.au/AUSSTATS/abs@.nsf/Lookup/4102.0Main+Features20Sep+2012>. Accessed 13 November, 2012.
54. Hotham E, Ali R, White J, et al. Pregnancy-related changes in tobacco, alcohol and cannabis use reported by antenatal patients at two public hospitals in South Australia. *Aust N Z J Obstet Gynaecol* 2008;**48**(3):248-54.
55. Australia's mothers and babies 2009. Perinatal statistics series no. 25. Cat. no. PER 52. Canberra: AIHW, 2011.
56. Maloney E, Hutchinson D, Burns L, et al. Prevalence and predictors of alcohol use in pregnancy and breastfeeding among Australian women. *Birth* 2011;**38**(1):3-9.

**Appendix 4:** Sample size calculation (using 5% precision with 95% confidence interval) for the population survey on region and individual country levels.

|                                   | Study sample | Population size* | Expected prevalence           |                               |                               |                                   |                                   |
|-----------------------------------|--------------|------------------|-------------------------------|-------------------------------|-------------------------------|-----------------------------------|-----------------------------------|
|                                   |              |                  | <i>Any medication use=80%</i> | <i>Any medication use=70%</i> | <i>OTC medication use=60%</i> | <i>Chronic medication use=30%</i> | <i>Chronic medication use=15%</i> |
|                                   |              |                  | Required sample size          |                               |                               |                                   |                                   |
| <b>Western Europe</b>             | 3,201        | Not known        | 246                           | 323                           | 369                           | 323                               | 196                               |
| United Kingdom                    | 1,120        | 120,528          | 245                           | 322                           | 368                           | 322                               | 196                               |
| Italy                             | 926          | 91,101           | 245                           | 322                           | 367                           | 322                               | 195                               |
| Switzerland                       | 618          | 13,468           | 241                           | 315                           | 359                           | 315                               | 193                               |
| France                            | 374          | 137,377          | 245                           | 322                           | 368                           | 322                               | 196                               |
| Austria <sup>†</sup>              | 82           | 13,018           | 241                           | 315                           | 359                           | 315                               | 193                               |
| The Netherlands <sup>†</sup>      | 81           | 30,010           | 244                           | 319                           | 364                           | 319                               | 195                               |
| <b>Northern Europe</b>            | 2,820        | Not known        | 246                           | 323                           | 369                           | 323                               | 196                               |
| Norway                            | 1,228        | 10,037           | 240                           | 313                           | 356                           | 313                               | 192                               |
| Sweden                            | 887          | 18,628           | 243                           | 317                           | 362                           | 317                               | 194                               |
| Finland                           | 574          | 9,994            | 240                           | 313                           | 356                           | 313                               | 192                               |
| Iceland <sup>†</sup>              | 71           | 749              | 185                           | 225                           | 247                           | 225                               | 155                               |
| <b>Eastern Europe</b>             | 2,342        | Not known        | 246                           | 323                           | 369                           | 323                               | 196                               |
| Russia                            | 1,008        | 299,438          | 246                           | 322                           | 368                           | 322                               | 196                               |
| Poland                            | 679          | 64,736           | 245                           | 321                           | 367                           | 321                               | 195                               |
| Croatia <sup>§</sup>              | 286          | 6,866            | 237                           | 308                           | 350                           | 308                               | 190                               |
| Serbia <sup>¶</sup>               | 220          | 10,933           | 240                           | 313                           | 357                           | 313                               | 192                               |
| Slovenia <sup>**</sup>            | 149          | 3,658            | 230                           | 297                           | 335                           | 297                               | 186                               |
| <b>North America</b>              | 533          | Not known        | 246                           | 323                           | 369                           | 323                               | 196                               |
| USA <sup>§</sup>                  | 297          | 666,564          | 246                           | 323                           | 369                           | 323                               | 196                               |
| Canada <sup>††</sup>              | 236          | 62,939           | 245                           | 321                           | 367                           | 321                               | 195                               |
| <b>South America<sup>¶¶</sup></b> | 346          | Not known        | 246                           | 323                           | 369                           | 323                               | 196                               |
| <b>Australia<sup>§§</sup></b>     | 217          | 50,270           | 245                           | 321                           | 366                           | 321                               | 195                               |

1  
2  
3  
4  
5 Sample size calculations were performed in Epi Info <sup>TM</sup> 7 available at: Center for DiseaseControl and Prevention (CDC), Epi Info. URL: <http://wwwn.cdc.gov/epiinfo/>.  
6 Accessed 2013 Dec 31.

7 \*The population size indicates the number of live births in the country in two months (corresponds to the period of data collection) (cf. Appendix 3 for annual estimates of  
8 live births in each country). For the all regions except Australia, the population size is very large but not known exactly (i.e. infinite population). Infinite population size is  
9 therefore assumed in the calculation of the required sample size.

10 †The sample size allows for prevalence estimates with a precision of 9% (expected prevalence=80%), 10% (expected prevalence=70% and 30%), 11% (expected  
11 prevalence=60%) and 8% (expected prevalence=15%).

12 §The sample size allows for prevalence estimates with a precision of 6% (expected prevalence=70%, 60% and 30%).

13 ¶The sample size allows for prevalence estimates with a precision of 6% (expected prevalence=80%) and 7% (expected prevalence=70%, 60% and 30%).

14 \*\*The sample size allows for prevalence estimates with a precision of 7% (expected prevalence=80%), 8% (expected prevalence=70%, 60% and 30%) and 6% (expected  
15 prevalence=15%).

16 ††The sample size allows for prevalence estimates with a precision of 6% (expected prevalence=80%, 70% and 30%) and 7% (expected prevalence=60%).

17 ¶¶The sample size allows for prevalence estimates with a precision of 6% (expected prevalence=60%).

18 §§The sample size allows for prevalence estimates with a precision of 6% (expected prevalence=80%) and 7% (expected prevalence=70%, 60% and 30%).  
19  
20  
21  
22  
23  
24  
25  
26  
27  
28  
29  
30  
31  
32  
33  
34  
35  
36  
37  
38  
39  
40  
41  
42  
43  
44  
45  
46  
47

**Appendix 5:** Overall medication use on 1<sup>st</sup> and 2<sup>nd</sup> ATC level according to timing of use in pregnancy (n=9,459)\*

| Anatomical Therapeutic Chemical (ATC) classification index<br>1 <sup>st</sup> and 2 <sup>nd</sup> levels |                                                                  | Anytime during<br>pregnancy<br>n (%) | 1 <sup>st</sup> trimester<br>n (%) | 2 <sup>nd</sup> trimester<br>n (%) | 3 <sup>rd</sup> trimester<br>n (%) |
|----------------------------------------------------------------------------------------------------------|------------------------------------------------------------------|--------------------------------------|------------------------------------|------------------------------------|------------------------------------|
| <b>A</b>                                                                                                 | <b>Alimentary tract and metabolism</b>                           | <b>4,275 (45.2)</b>                  | <b>2,786 (29.5)</b>                | <b>3,390 (35.8)</b>                | <b>3,160 (33.4)</b>                |
| <b>A01</b>                                                                                               | Stomatological preparations                                      | 62 (0.7)                             | 42 (0.4)                           | 52 (0.5)                           | 46 (0.5)                           |
| <b>A02</b>                                                                                               | <i>Drugs for acid related disorders</i>                          | 3,242 (34.3)                         | 2,034 (21.5)                       | 2,634 (27.8)                       | 2,615 (27.6)                       |
| <b>A03</b>                                                                                               | Drugs for functional gastrointestinal disorders                  | 650 (6.9)                            | 543 (5.7)                          | 512 (5.4)                          | 381 (4.0)                          |
| <b>A04</b>                                                                                               | Antiemetics and antinauseants                                    | 136 (1.4)                            | 124 (1.3)                          | 114 (1.2)                          | 81 (0.9)                           |
| <b>A05</b>                                                                                               | Bile and liver therapy                                           | 24 (0.3)                             | 15 (0.2)                           | 17 (0.2)                           | 16 (0.2)                           |
| <b>A06</b>                                                                                               | <i>Laxatives</i>                                                 | 978 (10.3)                           | 696 (7.4)                          | 835 (8.8)                          | 735 (7.8)                          |
| <b>A07</b>                                                                                               | Antidiarrheals, intestinal antiinflammatory/antiinfective agents | 89 (0.9)                             | 61 (0.6)                           | 69 (0.7)                           | 57 (0.6)                           |
| <b>A09</b>                                                                                               | Digestives, incl. enzymes                                        | 9 (0.1)                              | 7 (0.1)                            | 8 (0.1)                            | 3 (0.0)                            |
| <b>A10</b>                                                                                               | Drugs used in diabetes                                           | 85 (0.9)                             | 57 (0.6)                           | 58 (0.6)                           | 45 (0.5)                           |
| -                                                                                                        | Unspecified medications for nausea                               | 6 (0.1)                              | 5 (0.1)                            | 4 (0.0)                            | 3 (0.0)                            |
| <b>B</b>                                                                                                 | <b>Blood and blood forming organs</b>                            | <b>148 (1.6)</b>                     | <b>89 (0.9)</b>                    | <b>102 (1.1)</b>                   | <b>79 (0.8)</b>                    |
| <b>B01</b>                                                                                               | <i>Antithrombotic agents</i>                                     | 135 (1.4)                            | 78 (0.8)                           | 95 (1.0)                           | 72 (0.8)                           |
| <b>B02</b>                                                                                               | Antihemorrhagics                                                 | 5 (0.1)                              | 4 (0.0)                            | 2 (0.0)                            | 3 (0.0)                            |
| <b>B05</b>                                                                                               | Blood substitutes and perfusion solutions                        | 7 (0.1)                              | 5 (0.1)                            | 5 (0.1)                            | 2 (0.0)                            |
| <b>B06</b>                                                                                               | Other hematological agents                                       | 3 (0.0)                              | 2 (0.0)                            | 2 (0.0)                            | 3 (0.0)                            |
| <b>C</b>                                                                                                 | <b>Cardiovascular system</b>                                     | <b>202 (2.1)</b>                     | <b>132 (1.4)</b>                   | <b>161 (1.7)</b>                   | <b>133 (1.4)</b>                   |
| <b>C01</b>                                                                                               | Cardiac therapy                                                  | 7 (0.1)                              | 4 (0.0)                            | 5 (0.1)                            | 4 (0.1)                            |
| <b>C02</b>                                                                                               | <i>Antihypertensives</i>                                         | 56 (0.6)                             | 34 (0.4)                           | 42 (0.4)                           | 31 (0.3)                           |
| <b>C03</b>                                                                                               | Diuretics                                                        | 6 (0.1)                              | 5 (0.1)                            | 3 (0.0)                            | 2 (0.0)                            |
| <b>C04</b>                                                                                               | Peripheral vasodilators                                          | 3 (0.0)                              | 3 (0.0)                            | 3 (0.0)                            | 3 (0.0)                            |
| <b>C05</b>                                                                                               | Vasoprotectives                                                  | 44 (0.5)                             | 24 (0.3)                           | 35 (0.4)                           | 31 (0.3)                           |
| <b>C07</b>                                                                                               | <i>Beta blocking agents</i>                                      | 74 (0.8)                             | 51 (0.5)                           | 59 (0.6)                           | 51 (0.5)                           |
| <b>C08</b>                                                                                               | Calcium channel blockers                                         | 21 (0.2)                             | 16 (0.2)                           | 18 (0.2)                           | 13 (0.1)                           |
| <b>C09</b>                                                                                               | Agents acting on the renin-angiotensin system                    | 4 (0.0)                              | 2 (0.0)                            | 2 (0.0)                            | 2 (0.0)                            |

| Anatomical Therapeutic Chemical (ATC) classification index<br>1 <sup>st</sup> and 2 <sup>nd</sup> levels |                                                                        | Anytime during<br>pregnancy<br>n (%) | 1 <sup>st</sup> trimester<br>n (%) | 2 <sup>nd</sup> trimester<br>n (%) | 3 <sup>rd</sup> trimester<br>n (%) |
|----------------------------------------------------------------------------------------------------------|------------------------------------------------------------------------|--------------------------------------|------------------------------------|------------------------------------|------------------------------------|
| <b>C10</b>                                                                                               | Lipid modifying agents                                                 | 5 (0.1)                              | 3 (0.0)                            | 4 (0.0)                            | 4 (0.0)                            |
| -                                                                                                        | Unspecified medications for hypertension                               | 4 (0.0)                              | 3 (0.0)                            | 3 (0.0)                            | 2 (0.0)                            |
| <b>D</b>                                                                                                 | <b>Dermatologicals</b>                                                 | <b>162 (1.7)</b>                     | <b>116 (1.2)</b>                   | <b>127 (1.3)</b>                   | <b>103 (1.1)</b>                   |
| <b>D01</b>                                                                                               | <i>Antifungals for dermatological use</i>                              | 38 (0.4)                             | 28 (0.3)                           | 33 (0.3)                           | 27 (0.3)                           |
| <b>D02</b>                                                                                               | Emollients and protectives                                             | 14 (0.1)                             | 11 (0.1)                           | 12 (0.1)                           | 10 (0.1)                           |
| <b>D03</b>                                                                                               | Preparations for treatment of wounds and ulcers                        | 4 (0.0)                              | 3 (0.0)                            | 3 (0.0)                            | 3 (0.0)                            |
| <b>D04</b>                                                                                               | Antipruritics, incl. antihistamines, anaesthetics, etc.                | 6 (0.1)                              | 3 (0.0)                            | 5 (0.1)                            | 4 (0.0)                            |
| <b>D05</b>                                                                                               | Antipsoriatics                                                         | 3 (0.0)                              | 1 (0.0)                            | 1 (0.0)                            | 1 (0.0)                            |
| <b>D06</b>                                                                                               | Antibiotics and chemotherapeutics for dermatological use               | 21 (0.2)                             | 15 (0.2)                           | 16 (0.2)                           | 13 (0.1)                           |
| <b>D07</b>                                                                                               | <i>Corticosteroids, dermatological preparations</i>                    | 56 (0.6)                             | 40 (0.4)                           | 39 (0.4)                           | 31 (0.3)                           |
| <b>D08</b>                                                                                               | Antiseptics and disinfectants                                          | 14 (0.1)                             | 9 (0.1)                            | 10 (0.1)                           | 9 (0.1)                            |
| <b>D09</b>                                                                                               | Medicated dressings                                                    | 5 (0.1)                              | 5 (0.1)                            | 5 (0.1)                            | 3 (0.0)                            |
| <b>D10</b>                                                                                               | Anti-acne preparations                                                 | 4 (0.0)                              | 4 (0.0)                            | 4 (0.0)                            | 2 (0.0)                            |
| <b>D11</b>                                                                                               | Other dermatological preparations                                      | 1 (0.0)                              | -                                  | 1 (0.0)                            | 1 (0.0)                            |
| -                                                                                                        | Unspecified medications for skin disorders                             | 5 (0.1)                              | 4 (0.0)                            | 4 (0.0)                            | 3 (0.0)                            |
| <b>G</b>                                                                                                 | <b>Genitourinary system and sex hormones</b>                           | <b>488 (5.2)</b>                     | <b>318 (3.4)</b>                   | <b>394 (4.2)</b>                   | <b>303 (3.2)</b>                   |
| <b>G01</b>                                                                                               | <i>Gynaecological antiinfective and antiseptics</i>                    | 406 (4.3)                            | 255 (2.7)                          | 337 (3.6)                          | 258 (2.7)                          |
| <b>G02</b>                                                                                               | Other gynecologicals                                                   | 13 (0.1)                             | 10 (0.1)                           | 10 (0.1)                           | 8 (0.1)                            |
| <b>G03</b>                                                                                               | Sex hormones and modulators of the genital system                      | 68 (0.7)                             | 55 (0.6)                           | 50 (0.5)                           | 36 (0.4)                           |
| <b>G04</b>                                                                                               | Urologicals                                                            | 12 (0.1)                             | 8 (0.1)                            | 7 (0.1)                            | 8 (0.1)                            |
| <b>H</b>                                                                                                 | <b>Systemic hormonal preparations, excl. sex hormones and insulins</b> | <b>486 (5.1)</b>                     | <b>304 (3.2)</b>                   | <b>346 (3.7)</b>                   | <b>262 (2.8)</b>                   |
| <b>H01</b>                                                                                               | Pituitary and hypothalamic hormones and analogues                      | 4 (0.0)                              | 4 (0.0)                            | 3 (0.0)                            | 4 (0.0)                            |
| <b>H02</b>                                                                                               | Corticosteroids for systemic use                                       | 93 (1.0)                             | 64 (0.7)                           | 78 (0.8)                           | 63 (0.7)                           |
| <b>H03</b>                                                                                               | <i>Thyroid therapy</i>                                                 | 397 (4.2)                            | 242 (2.6)                          | 273 (2.9)                          | 201 (2.1)                          |
| <b>J</b>                                                                                                 | <b>Anti-infective for systemic use</b>                                 | <b>1,381 (14.6)</b>                  | <b>874 (9.2)</b>                   | <b>1,107 (11.7)</b>                | <b>943 (10.0)</b>                  |
| <b>J01</b>                                                                                               | <i>Antibacterials for systemic use</i>                                 | 1,325 (14.0)                         | 840 (8.9)                          | 1,061 (11.2)                       | 908 (9.6)                          |
| <b>J02</b>                                                                                               | Antimycotics for systemic use                                          | 23 (0.2)                             | 16 (0.2)                           | 21 (0.2)                           | 17 (0.2)                           |

| Anatomical Therapeutic Chemical (ATC) classification index<br>1 <sup>st</sup> and 2 <sup>nd</sup> levels |                                                            | Anytime during<br>pregnancy<br>n (%) | 1 <sup>st</sup> trimester<br>n (%) | 2 <sup>nd</sup> trimester<br>n (%) | 3 <sup>rd</sup> trimester<br>n (%) |
|----------------------------------------------------------------------------------------------------------|------------------------------------------------------------|--------------------------------------|------------------------------------|------------------------------------|------------------------------------|
| <b>J05</b>                                                                                               | Antivirals for systemic use                                | 39 (0.4)                             | 27 (0.3)                           | 30 (0.3)                           | 26 (0.3)                           |
| <b>J06</b>                                                                                               | Immune sera and immunoglobulins                            | 4 (0.0)                              | 2 (0.0)                            | 3 (0.0)                            | 4 (0.0)                            |
| <b>J07</b>                                                                                               | Vaccines                                                   | 10 (0.1)                             | 5 (0.1)                            | 8 (0.1)                            | 5 (0.1)                            |
| <b>L</b>                                                                                                 | <b>Antineoplastic and immunomodulating agents</b>          | <b>134 (1.4)</b>                     | <b>83 (0.9)</b>                    | <b>117 (1.2)</b>                   | <b>97 (1.0)</b>                    |
| <b>L01</b>                                                                                               | Antineoplastic agents                                      | 4 (0.0)                              | 3 (0.0)                            | 4 (0.0)                            | 1 (0.0)                            |
| <b>L03</b>                                                                                               | <i>Immunostimulants</i>                                    | 96 (1.0)                             | 58 (0.6)                           | 86 (0.9)                           | 78 (0.8)                           |
| <b>L04</b>                                                                                               | Immunosuppressants                                         | 34 (0.4)                             | 22 (0.2)                           | 27 (0.3)                           | 18 (0.2)                           |
| <b>M</b>                                                                                                 | <b>Musculo-skeletal system</b>                             | <b>571 (6.0)</b>                     | <b>416 (4.4)</b>                   | <b>437 (4.6)</b>                   | <b>380 (4.0)</b>                   |
| <b>M01</b>                                                                                               | <i>Antiinflammatory and antirheumatic products</i>         | 515 (5.4)                            | 378 (4.0)                          | 396 (4.2)                          | 342 (3.6)                          |
| <b>M02</b>                                                                                               | Topical products for joint and muscular pain               | 54 (0.6)                             | 37 (0.4)                           | 41 (0.4)                           | 41 (0.4)                           |
| <b>M03</b>                                                                                               | Muscle relaxants                                           | 8 (0.1)                              | 8 (0.1)                            | 4 (0.0)                            | 1 (0.0)                            |
| <b>M05</b>                                                                                               | Drugs for treatment of bone diseases                       | 1 (0.0)                              | -                                  | 1 (0.0)                            | -                                  |
| <b>M09</b>                                                                                               | Other drugs for disorders of the musculo-skeletal system   | 2 (0.0)                              | 2 (0.0)                            | 2 (0.0)                            | 2 (0.0)                            |
| -                                                                                                        | Unspecified medications for headache                       | 2 (0.0)                              | 1 (0.0)                            | 1 (0.0)                            | 1 (0.0)                            |
| <b>N</b>                                                                                                 | <b>Nervous system</b>                                      | <b>5,441 (57.5)</b>                  | <b>3,638 (38.5)</b>                | <b>4,247 (44.9)</b>                | <b>3,449 (36.5)</b>                |
| <b>N01</b>                                                                                               | Anaesthetics                                               | 13 (0.1)                             | 10 (0.1)                           | 7 (0.1)                            | 8 (0.1)                            |
| <b>N02</b>                                                                                               | <i>Analgesics</i>                                          | 5,297 (56.0)                         | 3,562 (37.7)                       | 4,171 (44.1)                       | 3,387 (35.8)                       |
| <b>N03</b>                                                                                               | Antiepileptics                                             | 76 (0.8)                             | 46 (0.5)                           | 49 (0.5)                           | 42 (0.4)                           |
| <b>N05</b>                                                                                               | <i>Psycholeptics</i>                                       | 210 (2.2)                            | 173 (1.8)                          | 164 (1.7)                          | 138 (1.5)                          |
| <b>N06</b>                                                                                               | <i>Psychoanaleptics</i>                                    | 275 (2.9)                            | 211 (2.2)                          | 213 (2.3)                          | 179 (1.9)                          |
| <b>N07</b>                                                                                               | Other nervous system drugs                                 | 6 (0.1)                              | 4 (0.0)                            | 5 (0.1)                            | 3 (0.0)                            |
| -                                                                                                        | Unspecified analgesics/medications for the nervous system  | 52 (0.5)                             | 38 (0.4)                           | 43 (0.5)                           | 35 (0.4)                           |
| <b>P</b>                                                                                                 | <b>Antiparasitic products, insecticides and repellents</b> | <b>26 (0.3)</b>                      | <b>20 (0.2)</b>                    | <b>22 (0.2)</b>                    | <b>16 (0.2)</b>                    |
| <b>P01</b>                                                                                               | <i>Antiprotozoals</i>                                      | 25 (0.3)                             | 20 (0.2)                           | 22 (0.2)                           | 16 (0.2)                           |
| <b>P02</b>                                                                                               | Anthelmintics                                              | 1 (0.0)                              | -                                  | -                                  | -                                  |
| <b>R</b>                                                                                                 | <b>Respiratory system</b>                                  | <b>2,609 (27.6)</b>                  | <b>1,878 (19.9)</b>                | <b>2,047 (21.6)</b>                | <b>1,702 (18.0)</b>                |
| <b>R01</b>                                                                                               | <i>Nasal preparations</i>                                  | 1,547 (16.4)                         | 1,079 (11.4)                       | 1,229 (13.0)                       | 1,046 (11.1)                       |

| Anatomical Therapeutic Chemical (ATC) classification index<br>1 <sup>st</sup> and 2 <sup>nd</sup> levels |                                                   | Anytime during<br>pregnancy<br>n (%) | 1 <sup>st</sup> trimester<br>n (%) | 2 <sup>nd</sup> trimester<br>n (%) | 3 <sup>rd</sup> trimester<br>n (%) |
|----------------------------------------------------------------------------------------------------------|---------------------------------------------------|--------------------------------------|------------------------------------|------------------------------------|------------------------------------|
| <b>R02</b>                                                                                               | Throat preparations                               | 167 (1.8)                            | 110 (1.2)                          | 131 (1.4)                          | 122 (1.3)                          |
| <b>R03</b>                                                                                               | <i>Drugs for obstructive airway diseases</i>      | 396 (4.2)                            | 269 (2.8)                          | 304 (3.2)                          | 242 (2.6)                          |
| <b>R05</b>                                                                                               | Cough and cold preparations                       | 152 (1.6)                            | 103 (1.1)                          | 125 (1.3)                          | 101 (1.1)                          |
| <b>R06</b>                                                                                               | <i>Antihistamines for systemic use</i>            | 912 (9.6)                            | 777 (8.2)                          | 740 (7.8)                          | 580 (6.1)                          |
| <b>R07</b>                                                                                               | Other respiratory system products                 | 3 (0.0)                              | 2 (0.0)                            | 3 (0.0)                            | 3 (0.0)                            |
| -                                                                                                        | Unspecified medications of the respiratory system | 142 (1.5)                            | 101 (1.1)                          | 118 (1.2)                          | 99 (1.0)                           |
| <b>S</b>                                                                                                 | <b>Sensory organs</b>                             | <b>45 (0.5)</b>                      | <b>33 (0.3)</b>                    | <b>38 (0.4)</b>                    | <b>28 (0.3)</b>                    |
| <b>S01</b>                                                                                               | <i>Ophthalmologicals</i>                          | 33 (0.3)                             | 24 (0.3)                           | 28 (0.3)                           | 23 (0.2)                           |
| <b>S02</b>                                                                                               | Otologicals                                       | 5 (0.1)                              | 3 (0.0)                            | 4 (0.0)                            | 2 (0.0)                            |
| <b>S03</b>                                                                                               | Ophthalmological and otological preparations      | 3 (0.0)                              | 2 (0.0)                            | 2 (0.0)                            | 2 (0.0)                            |
| -                                                                                                        | Unspecified medications for eye disorders         | 5 (0.1)                              | 4 (0.0)                            | 5 (0.1)                            | 2 (0.0)                            |
| <b>V</b>                                                                                                 | <b>Various</b>                                    | 15 (0.2)                             | 10 (0.1)                           | 11 (0.1)                           | 9 (0.1)                            |
| <b>Total medication use (any ATC)</b>                                                                    |                                                   | <b>7,678 (81.2)</b>                  | <b>4,710 (49.8)</b>                | <b>5,538 (58.5)</b>                | <b>4,663 (49.3)</b>                |

\*The most common medication groups within each ATC class are in italics. Exposure timing is defined as follows: 1<sup>st</sup> trimester (gestational weeks 0-12), 2<sup>nd</sup> trimester (gestational week 13-24), 3<sup>rd</sup> trimester (gestational week 25 and up to childbirth).

**Appendix 6:** Prevalence of acute/short-term illnesses and most common medications used at any time during pregnancy by ATC level, indication for use and region (n=9,459) <sup>\*†</sup>

| Prevalence of acute/short-term illnesses in pregnancy and related medication use, overall and by drug groups | REGION                             |                                     |                                    |                                 |                                 |                             | Total               |
|--------------------------------------------------------------------------------------------------------------|------------------------------------|-------------------------------------|------------------------------------|---------------------------------|---------------------------------|-----------------------------|---------------------|
|                                                                                                              | Western Europe<br>n=3,201<br>n (%) | Northern Europe<br>n=2,820<br>n (%) | Eastern Europe<br>n=2,342<br>n (%) | North America<br>n=533<br>n (%) | South America<br>n=346<br>n (%) | Australia<br>n=217<br>n (%) |                     |
| <b>Prevalence of headache</b>                                                                                | 1,699 (53.1)                       | 1,657 (58.8)                        | 1,138 (48.6)                       | 373 (70.0)                      | 197 (56.9)                      | 147 (67.7)                  | 5,211 (55.1)        |
| <b>Medication use for headache, total</b>                                                                    | <b>1,027 (32.1)</b>                | <b>1,057 (37.5)</b>                 | <b>522 (22.3)</b>                  | <b>226 (42.4)</b>               | <b>121 (35.0)</b>               | <b>109 (50.2)</b>           | <b>3,062 (32.4)</b> |
| <i>By drug group</i>                                                                                         |                                    |                                     |                                    |                                 |                                 |                             |                     |
| Paracetamol (incl. combinations) (N02BE)                                                                     | 994 (31.1)                         | 1,009 (35.8)                        | 372 (15.9)                         | 206 (38.6)                      | 92 (26.6)                       | 101 (46.5)                  | 2,774 (29.3)        |
| Non-steroidal antiinflammatory drugs (M01A)                                                                  | 28 (0.9)                           | 78 (2.8)                            | 37 (1.6)                           | 18 (3.0)                        | 18 (5.2)                        | 2 (0.9)                     | 179 (1.9)           |
| Acetylsalicylic acid (incl. combinations) (N02BA)                                                            | 7 (0.2)                            | 4 (0.1)                             | 81 (3.5)                           | 1 (0.2)                         | 4 (1.2)                         | 2 (0.9)                     | 99 (1.0)            |
| Opioid analgesics (N02A)                                                                                     | 14 (0.4)                           | 46 (1.6)                            | 3 (0.1)                            | 3 (0.6)                         | -                               | 13 (6.0)                    | 79 (0.8)            |
| Selective serotonin (5-HT <sub>1</sub> ) agonists (N02CC)                                                    | 6 (0.2)                            | 22 (0.8)                            | 2 (0.1)                            | 3 (0.6)                         | -                               | 1 (0.5)                     | 34 (0.4)            |
| <b>Prevalence of heartburn</b>                                                                               | 2,196 (68.6)                       | 1,875 (66.5)                        | 1,425 (60.8)                       | 374 (70.2)                      | 248 (71.7)                      | 141 (65.0)                  | 6,259 (66.2)        |
| <b>Medication use for heartburn, total</b>                                                                   | <b>984 (30.7)</b>                  | <b>885 (31.4)</b>                   | <b>525 (22.4)</b>                  | <b>202 (37.9)</b>               | <b>88 (25.4)</b>                | <b>72 (33.2)</b>            | <b>2,756 (29.1)</b> |
| <i>By drug group</i>                                                                                         |                                    |                                     |                                    |                                 |                                 |                             |                     |
| Antacids (aluminium, salts combinations, antifatulents)                                                      | 384 (12.0)                         | 503 (17.8)                          | 440 (18.8)                         | 51 (9.6)                        | 63 (18.2)                       | 20 (9.2)                    | 1,461 (15.4)        |
| Alginic acid complex/sucralfate/bismuth (A02BX)                                                              | 569 (17.8)                         | 332 (11.8)                          | 86 (3.7)                           | 4 (0.8)                         | 3 (0.9)                         | 14 (6.5)                    | 1,008 (10.7)        |
| Proton pump inhibitors (A02BC)                                                                               | 77 (2.4)                           | 86 (3.0)                            | 4 (0.2)                            | 13 (2.4)                        | 3 (0.9)                         | 7 (3.2)                     | 190 (2.0)           |
| Antacid with calcium (A02AC)                                                                                 | 20 (0.6)                           | 13 (0.5)                            | 10 (0.4)                           | 123 (23.1)                      | 2 (0.6)                         | 9 (4.1)                     | 177 (1.9)           |
| H <sub>2</sub> receptor antagonists (A02BA)                                                                  | 27 (0.8)                           | 27 (1.0)                            | 7 (0.3)                            | 45 (8.4)                        | 5 (1.4)                         | 38 (17.5)                   | 149 (1.6)           |
| <b>Prevalence of pain</b>                                                                                    | 2,150 (67.2)                       | 2,067 (73.3)                        | 1,484 (63.4)                       | 369 (69.2)                      | 248 (71.7)                      | 157 (72.4)                  | 6,475 (68.5)        |
| <b>Medication use for pain, total</b>                                                                        | <b>533 (16.7)</b>                  | <b>426 (15.1)</b>                   | <b>147 (6.3)</b>                   | <b>110 (20.6)</b>               | <b>80 (23.1)</b>                | <b>59 (27.2)</b>            | <b>1,355 (14.3)</b> |
| <i>By drug group</i>                                                                                         |                                    |                                     |                                    |                                 |                                 |                             |                     |
| Paracetamol (incl. combinations) (N02BE)                                                                     | 444 (13.9)                         | 374 (13.3)                          | 65 (2.8)                           | 99 (18.6)                       | 44 (12.7)                       | 55 (25.3)                   | 1,081 (11.4)        |



1  
2  
3  
4  
5  
6  
7  
8  
9  
10  
11  
12  
13  
14  
15  
16  
17  
18  
19  
20  
21  
22  
23  
24  
25  
26  
27  
28  
29  
30  
31  
32  
33  
34  
35  
36  
37  
38  
39  
40  
41  
42  
43  
44  
45  
46  
47

|                                                                                                                     | REGION                |                        |                       |                      |                      |                   |                     |
|---------------------------------------------------------------------------------------------------------------------|-----------------------|------------------------|-----------------------|----------------------|----------------------|-------------------|---------------------|
| <b>Prevalence of acute/short-term illnesses in pregnancy and related medication use, overall and by drug groups</b> | <b>Western Europe</b> | <b>Northern Europe</b> | <b>Eastern Europe</b> | <b>North America</b> | <b>South America</b> | <b>Australia</b>  | <b>Total</b>        |
|                                                                                                                     | <b>n=3,201</b>        | <b>n=2,820</b>         | <b>n=2,342</b>        | <b>n=533</b>         | <b>n=346</b>         | <b>n=217</b>      | <b>n=9,459</b>      |
|                                                                                                                     | <b>n (%)</b>          | <b>n (%)</b>           | <b>n (%)</b>          | <b>n (%)</b>         | <b>n (%)</b>         | <b>n (%)</b>      | <b>n (%)</b>        |
| Non-steroidal antiinflammatory drugs (M01A)                                                                         | 19 (0.6)              | 36 (1.3)               | 21 (0.9)              | 11 (2.1)             | 24 (6.9)             | 3 (1.4)           | 114 (1.2)           |
| Opioid analgesics (N02A)                                                                                            | 39 (1.2)              | 51 (1.8)               | 2 (0.1)               | 4 (0.8)              | -                    | 12 (5.5)          | 108 (1.1)           |
| <b>Prevalence of nausea</b>                                                                                         | <b>2,324 (72.6)</b>   | <b>2,244 (79.6)</b>    | <b>1,503 (64.2)</b>   | <b>409 (76.7)</b>    | <b>238 (68.8)</b>    | <b>173 (79.7)</b> | <b>6,891 (72.9)</b> |
| <b>Medication use for nausea, total</b>                                                                             | <b>413 (12.9)</b>     | <b>380 (13.5)</b>      | <b>140 (6.0)</b>      | <b>128 (24.0)</b>    | <b>71 (20.5)</b>     | <b>39 (18.0)</b>  | <b>1,171 (12.4)</b> |
| <i>By drug group</i>                                                                                                |                       |                        |                       |                      |                      |                   |                     |
| First generation antihistamines (R06A)                                                                              | 150 (4.7)             | 259 (9.2)              | 21 (0.9)              | 84 (15.9)            | 9 (2.6)              | 4 (1.8)           | 527 (5.6)           |
| Metoclopramide/domperidone/bromopride (A03FA)                                                                       | 134 (4.2)             | 69 (2.4)               | 27 (1.2)              | 10 (1.9)             | 45 (13.0)            | 25 (11.5)         | 310 (3.3)           |
| Serotonin antagonists (A04AA)                                                                                       | 4 (0.1)               | 8 (0.3)                | 1 (0.0)               | 28 (5.3)             | 1 (0.3)              | 11 (5.1)          | 53 (0.6)            |
| <b>Prevalence of UTI</b>                                                                                            | <b>513 (16.0)</b>     | <b>327 (11.6)</b>      | <b>452 (19.3)</b>     | <b>93 (17.4)</b>     | <b>92 (26.6)</b>     | <b>25 (11.5)</b>  | <b>1,502 (15.9)</b> |
| <b>Medication use for UTI, total</b>                                                                                | <b>315 (9.8)</b>      | <b>221 (7.8)</b>       | <b>192 (8.2)</b>      | <b>56 (10.5)</b>     | <b>63 (18.2)</b>     | <b>17 (7.8)</b>   | <b>864 (9.1)</b>    |
| <i>By drug group</i>                                                                                                |                       |                        |                       |                      |                      |                   |                     |
| Unspecified penicillins (J01C-)                                                                                     | 94 (2.9)              | 99 (3.5)               | 46 (2.0)              | 16 (3.0)             | 17 (4.9)             | 1 (0.5)           | 273 (2.9)           |
| NOS Antibacterials for systemic use (J01-)                                                                          | 116 (3.6)             | 85 (3.0)               | 25 (1.1)              | 20 (3.8)             | 14 (4.0)             | 6 (2.8)           | 266 (2.8)           |
| Penicillins with extended spectrum +/- beta-lactamase inhibitors (J01CA/J01CR)                                      | 85 (2.7)              | 78 (2.8)               | 44 (1.9)              | 14 (2.6)             | 17 (4.9)             | 1 (0.5)           | 239 (2.5)           |
| Nitrofurantoin (J01XE)                                                                                              | 7 (0.2)               | 25 (0.9)               | 54 (2.3)              | 10 (1.9)             | 3 (0.9)              | 1 (0.5)           | 100 (1.1)           |
| Cephalosporins (J01D)                                                                                               | 20 (0.6)              | 10 (0.4)               | 36 (1.5)              | 2 (0.4)              | 11 (3.2)             | 6 (2.8)           | 85 (0.9)            |
| <b>Total prevalence of any acute/short-term illness</b>                                                             | <b>3,159 (98.7)</b>   | <b>2,803 (99.4)</b>    | <b>2,299 (98.2)</b>   | <b>523 (98.1)</b>    | <b>341 (98.6)</b>    | <b>214 (98.6)</b> | <b>9,339 (98.7)</b> |
| <b>Total medication use for any acute/short-term illness</b>                                                        | <b>2,224 (69.5)</b>   | <b>1,954 (69.3)</b>    | <b>1,474 (62.9)</b>   | <b>403 (75.6)</b>    | <b>250 (72.3)</b>    | <b>164 (75.6)</b> | <b>6,469 (68.4)</b> |

\*Countries are grouped into regions as shown in Figure 1.

†Sums of percentages do not add up to total medication use as only most common medication groups are presented. Rates do not include mineral supplements, vitamins, iron, and herbal or alternative medicine products.

Abbreviations: UTI: Urinary tract infection; NOS: Not otherwise specified.

**Appendix 7: Prevalence of chronic/long-term disorders and most common medications used at any time during pregnancy by ATC level, indication for use and region (n=9,459) \*†**

|                                                                                                                      | REGION           |                  |                 |                 |                 |                  | Total            |
|----------------------------------------------------------------------------------------------------------------------|------------------|------------------|-----------------|-----------------|-----------------|------------------|------------------|
|                                                                                                                      | Western Europe   | Northern Europe  | Eastern Europe  | North America   | South America   | Australia        |                  |
| <b>Prevalence of chronic/long-term disorders in pregnancy and related medication use, overall and by drug groups</b> | <b>n=3,201</b>   | <b>n=2,820</b>   | <b>n=2,342</b>  | <b>n=533</b>    | <b>n=346</b>    | <b>n=217</b>     | <b>n=9,459</b>   |
|                                                                                                                      | <i>n (%)</i>     | <i>n (%)</i>     | <i>n (%)</i>    | <i>n (%)</i>    | <i>n (%)</i>    | <i>n (%)</i>     | <i>n (%)</i>     |
| <b>Prevalence of hypothyroidism</b>                                                                                  | 130 (4.1)        | 118 (4.2)        | 105 (4.5)       | 22 (4.1)        | 11 (3.2)        | 6 (2.8)          | 392 (4.1)        |
| <b>Medication use for hypothyroidism, total</b>                                                                      | <b>118 (3.7)</b> | <b>113 (4.0)</b> | <b>96 (4.1)</b> | <b>21 (3.9)</b> | <b>9 (2.6)</b>  | <b>6 (2.8)</b>   | <b>363 (3.8)</b> |
| <i>By drug group</i>                                                                                                 |                  |                  |                 |                 |                 |                  |                  |
| Thyroid hormone, levothyroxine (H03AA01)                                                                             | 117 (3.7)        | 112 (4.0)        | 89 (3.8)        | 21 (3.9)        | 9 (2.6)         | 6 (2.8)          | 354 (3.7)        |
| <b>Prevalence of asthma</b>                                                                                          | 163 (5.1)        | 193 (6.8)        | 58 (2.5)        | 43 (8.1)        | 12 (3.5)        | 24 (11.1)        | 493 (5.2)        |
| <b>Medication use for asthma, total</b>                                                                              | <b>122 (3.8)</b> | <b>133 (4.7)</b> | <b>38 (1.6)</b> | <b>35 (6.6)</b> | <b>8 (2.3)</b>  | <b>24 (11.1)</b> | <b>360 (3.8)</b> |
| <i>By drug group</i>                                                                                                 |                  |                  |                 |                 |                 |                  |                  |
| Inhalant selective beta-2 agonists (R03AC)                                                                           | 94 (2.9)         | 66 (2.3)         | 26 (1.1)        | 32 (6.0)        | 7 (2.0)         | 24 (11.1)        | 249 (2.6)        |
| Adrenergics and other drugs for COPD (R03AK)                                                                         | 33 (1.0)         | 46 (1.6)         | 10 (0.4)        | 3 (0.6)         | 2 (0.6)         | 7 (3.2)          | 101 (1.1)        |
| Inhalant glucocorticoids (R03BA)                                                                                     | 28 (0.9)         | 40 (1.4)         | 13 (0.6)        | 12 (2.3)        | -               | 4 (1.8)          | 97 (1.0)         |
| Systemic selective beta-2 agonists (R03CC)                                                                           | -                | 30 (1.1)         | -               | 2 (0.4)         | -               | -                | 32 (0.3)         |
| <b>Prevalence of allergy</b>                                                                                         | 205 (6.4)        | 372 (13.2)       | 163 (7.0)       | 51 (9.6)        | 20 (5.8)        | 23 (10.6)        | 834 (8.8)        |
| <b>Medication use for allergy, total</b>                                                                             | <b>66 (2.1)</b>  | <b>171 (6.1)</b> | <b>65 (2.8)</b> | <b>24 (4.5)</b> | <b>13 (3.8)</b> | <b>17 (7.8)</b>  | <b>356 (3.8)</b> |
| <i>By drug group</i>                                                                                                 |                  |                  |                 |                 |                 |                  |                  |
| Second generation antihistamines (R06A)                                                                              | 29 (0.9)         | 104 (3.7)        | 27 (1.2)        | 17 (3.2)        | 4 (1.2)         | 5 (2.3)          | 186 (2.0)        |
| Nasal corticosteroids (R01AD)                                                                                        | 11 (0.3)         | 32 (1.1)         | 17 (0.7)        | -               | -               | 7 (3.2)          | 67 (0.7)         |
| First generation antihistamines (R06A)                                                                               | 13 (0.4)         | 29 (1.0)         | 10 (0.4)        | 9 (1.7)         | 6 (1.7)         | 4 (1.8)          | 71 (0.8)         |
| <b>Prevalence of depression</b>                                                                                      | 95 (3.0)         | 144 (5.1)        | 29 (1.2)        | 52 (9.8)        | 4 (1.2)         | 25 (11.5)        | 349 (3.7)        |
| <b>Medication use for depression, total</b>                                                                          | <b>61 (1.9)</b>  | <b>100 (3.5)</b> | <b>11 (0.5)</b> | <b>29 (5.4)</b> | <b>1 (0.3)</b>  | <b>23 (10.6)</b> | <b>225 (2.4)</b> |
| <i>By drug group</i>                                                                                                 |                  |                  |                 |                 |                 |                  |                  |
| SSRI antidepressants (N06AB)                                                                                         | 44 (1.4)         | 82 (2.9)         | 6 (0.3)         | 14 (2.6)        | -               | 14 (6.5)         | 160 (1.7)        |
| SNRIs/mianserin/trazodone/mirtazapine/bupropion                                                                      | 9 (0.3)          | 11 (0.4)         | 1 (0.0)         | 15 (2.8)        | -               | 7 (3.2)          | 43 (0.5)         |

|                                                                                                                      | REGION                |                        |                       |                      |                      |                     |                     |
|----------------------------------------------------------------------------------------------------------------------|-----------------------|------------------------|-----------------------|----------------------|----------------------|---------------------|---------------------|
| <b>Prevalence of chronic/long-term disorders in pregnancy and related medication use, overall and by drug groups</b> | <b>Western Europe</b> | <b>Northern Europe</b> | <b>Eastern Europe</b> | <b>North America</b> | <b>South America</b> | <b>Australia</b>    | <b>Total</b>        |
|                                                                                                                      | <b>n=3,201</b>        | <b>n=2,820</b>         | <b>n=2,342</b>        | <b>n=533</b>         | <b>n=346</b>         | <b>n=217</b>        | <b>n=9,459</b>      |
|                                                                                                                      | <b><i>n (%)</i></b>   | <b><i>n (%)</i></b>    | <b><i>n (%)</i></b>   | <b><i>n (%)</i></b>  | <b><i>n (%)</i></b>  | <b><i>n (%)</i></b> | <b><i>n (%)</i></b> |
| Anxiolytics, benzodiazepine (N05BA)                                                                                  | 6 (0.2)               | 2 (0.1)                | 5 (0.2)               | -                    | -                    | 1 (0.5)             | 14 (0.1)            |
| Antipsychotics quetiapine/olanzapine (N05AH)                                                                         | 2 (0.1)               | 4 (0.1)                | -                     | 3 (0.6)              | -                    | 3 (1.4)             | 12 (0.1)            |
| <b>Total prevalence of any chronic/long-term disorder</b>                                                            | <b>617 (19.3)</b>     | <b>831 (29.5)</b>      | <b>576 (24.6)</b>     | <b>154 (28.9)</b>    | <b>51 (14.7)</b>     | <b>72 (33.2)</b>    | <b>2,301 (24.3)</b> |
| <b>Total medication use for any chronic/long-term disorder</b>                                                       | <b>462 (14.4)</b>     | <b>593 (21.0)</b>      | <b>322 (13.7)</b>     | <b>119 (22.3)</b>    | <b>38 (11.0)</b>     | <b>70 (32.3)</b>    | <b>1,604 (17.0)</b> |

\*Countries are grouped into regions as shown in Figure 1.

†Sums of percentages do not add up to total medication use as only most common medication groups are presented. Rates do not include mineral supplements, vitamins, iron, and herbal or alternative medicine products.

Abbreviations: COPD: Chronic obstructive pulmonary disease; SSRI: Selective serotonin re-uptake inhibitors; SNRI: Serotonin–noradrenaline reuptake inhibitors.

STROBE Statement—Checklist of items that should be included in reports of *cross-sectional studies*

|                              | Item No | Recommendation                                                                                                                                                                                                 |
|------------------------------|---------|----------------------------------------------------------------------------------------------------------------------------------------------------------------------------------------------------------------|
| <b>Title and abstract</b>    | 1       | ✗ (a) Indicate the study's design with a commonly used term in the title or the abstract                                                                                                                       |
|                              |         | ✗ (b) Provide in the abstract an informative and balanced summary of what was done and what was found                                                                                                          |
| <b>Introduction</b>          |         |                                                                                                                                                                                                                |
| Background/rationale         | 2       | ✗ Explain the scientific background and rationale for the investigation being reported                                                                                                                         |
| Objectives                   | 3       | ✗ State specific objectives, including any prespecified hypotheses                                                                                                                                             |
| <b>Methods</b>               |         |                                                                                                                                                                                                                |
| Study design                 | 4       | ✗ Present key elements of study design early in the paper                                                                                                                                                      |
| Setting                      | 5       | ✗ Describe the setting, locations, and relevant dates, including periods of recruitment, exposure, follow-up, and data collection                                                                              |
| Participants                 | 6       | ✗ (a) Give the eligibility criteria, and the sources and methods of selection of participants                                                                                                                  |
| Variables                    | 7       | ✗ Clearly define all outcomes, exposures, predictors, potential confounders, and effect modifiers. Give diagnostic criteria, if applicable                                                                     |
| Data sources/<br>measurement | 8*      | ✗ For each variable of interest, give sources of data and details of methods of assessment (measurement). Describe comparability of assessment methods if there is more than one group                         |
| Bias                         | 9       | ✗ Describe any efforts to address potential sources of bias                                                                                                                                                    |
| Study size                   | 10      | ✗ Explain how the study size was arrived at                                                                                                                                                                    |
| Quantitative variables       | 11      | ✗ Explain how quantitative variables were handled in the analyses. If applicable, describe which groupings were chosen and why                                                                                 |
| Statistical methods          | 12      | ✗ (a) Describe all statistical methods, including those used to control for confounding                                                                                                                        |
|                              |         | (b) Describe any methods used to examine subgroups and interactions                                                                                                                                            |
|                              |         | ✗ (c) Explain how missing data were addressed                                                                                                                                                                  |
|                              |         | (d) If applicable, describe analytical methods taking account of sampling strategy                                                                                                                             |
|                              |         | (e) Describe any sensitivity analyses                                                                                                                                                                          |
| <b>Results</b>               |         |                                                                                                                                                                                                                |
| Participants                 | 13*     | ✗ (a) Report numbers of individuals at each stage of study—eg numbers potentially eligible, examined for eligibility, confirmed eligible, included in the study, completing follow-up, and analysed            |
|                              |         | (b) Give reasons for non-participation at each stage                                                                                                                                                           |
|                              |         | (c) Consider use of a flow diagram                                                                                                                                                                             |
| Descriptive data             | 14*     | ✗ (a) Give characteristics of study participants (eg demographic, clinical, social) and information on exposures and potential confounders                                                                     |
|                              |         | (b) Indicate number of participants with missing data for each variable of interest                                                                                                                            |
| Outcome data                 | 15*     | ✗ Report numbers of outcome events or summary measures                                                                                                                                                         |
| Main results                 | 16      | ✗ (a) Give unadjusted estimates and, if applicable, confounder-adjusted estimates and their precision (eg, 95% confidence interval). Make clear which confounders were adjusted for and why they were included |
|                              |         | ✗ (b) Report category boundaries when continuous variables were categorized                                                                                                                                    |
|                              |         | (c) If relevant, consider translating estimates of relative risk into absolute risk for a                                                                                                                      |

|                          |    |                                                                                                                                                                              |
|--------------------------|----|------------------------------------------------------------------------------------------------------------------------------------------------------------------------------|
|                          |    | meaningful time period                                                                                                                                                       |
| Other analyses           | 17 | Report other analyses done—eg analyses of subgroups and interactions, and sensitivity analyses                                                                               |
| <b>Discussion</b>        |    |                                                                                                                                                                              |
| Key results              | 18 | ✗ Summarise key results with reference to study objectives                                                                                                                   |
| Limitations              | 19 | ✗ Discuss limitations of the study, taking into account sources of potential bias or imprecision. Discuss both direction and magnitude of any potential bias                 |
| Interpretation           | 20 | ✗ Give a cautious overall interpretation of results considering objectives, limitations, multiplicity of analyses, results from similar studies, and other relevant evidence |
| Generalisability         | 21 | ✗ Discuss the generalisability (external validity) of the study results                                                                                                      |
| <b>Other information</b> |    |                                                                                                                                                                              |
| Funding                  | 22 | ✗ Give the source of funding and the role of the funders for the present study and, if applicable, for the original study on which the present article is based              |

\*Give information separately for exposed and unexposed groups.

**Note:** An Explanation and Elaboration article discusses each checklist item and gives methodological background and published examples of transparent reporting. The STROBE checklist is best used in conjunction with this article (freely available on the Web sites of PLoS Medicine at <http://www.plosmedicine.org/>, Annals of Internal Medicine at <http://www.annals.org/>, and Epidemiology at <http://www.epidem.com/>). Information on the STROBE Initiative is available at [www.strobe-statement.org](http://www.strobe-statement.org).
